# Supplementary material for: Equipped for Sexual Stings? Male-Specific Venom Peptides in Euscorpius italicus
Source: MDPI journal article supplement (doi:10.3390/ijms231911020), 2022-09-20
Supplement: s1 [file s1]

**Supplementary Material Table S1:** Table of all venom compounds identified in *E. italicus* by a combined transcriptomic and proteomic approach.

**Supplementary Material Figure S1:** Compilation of MALDI TOF mass spectra of 20 venom samples from 10 individuals of *E. italicus* demonstrating a male specific expression of venom compounds. **(a)** Mass range from m/z 800 to 4500. **(b)** Mass range from m/z 3000 – 10,000.

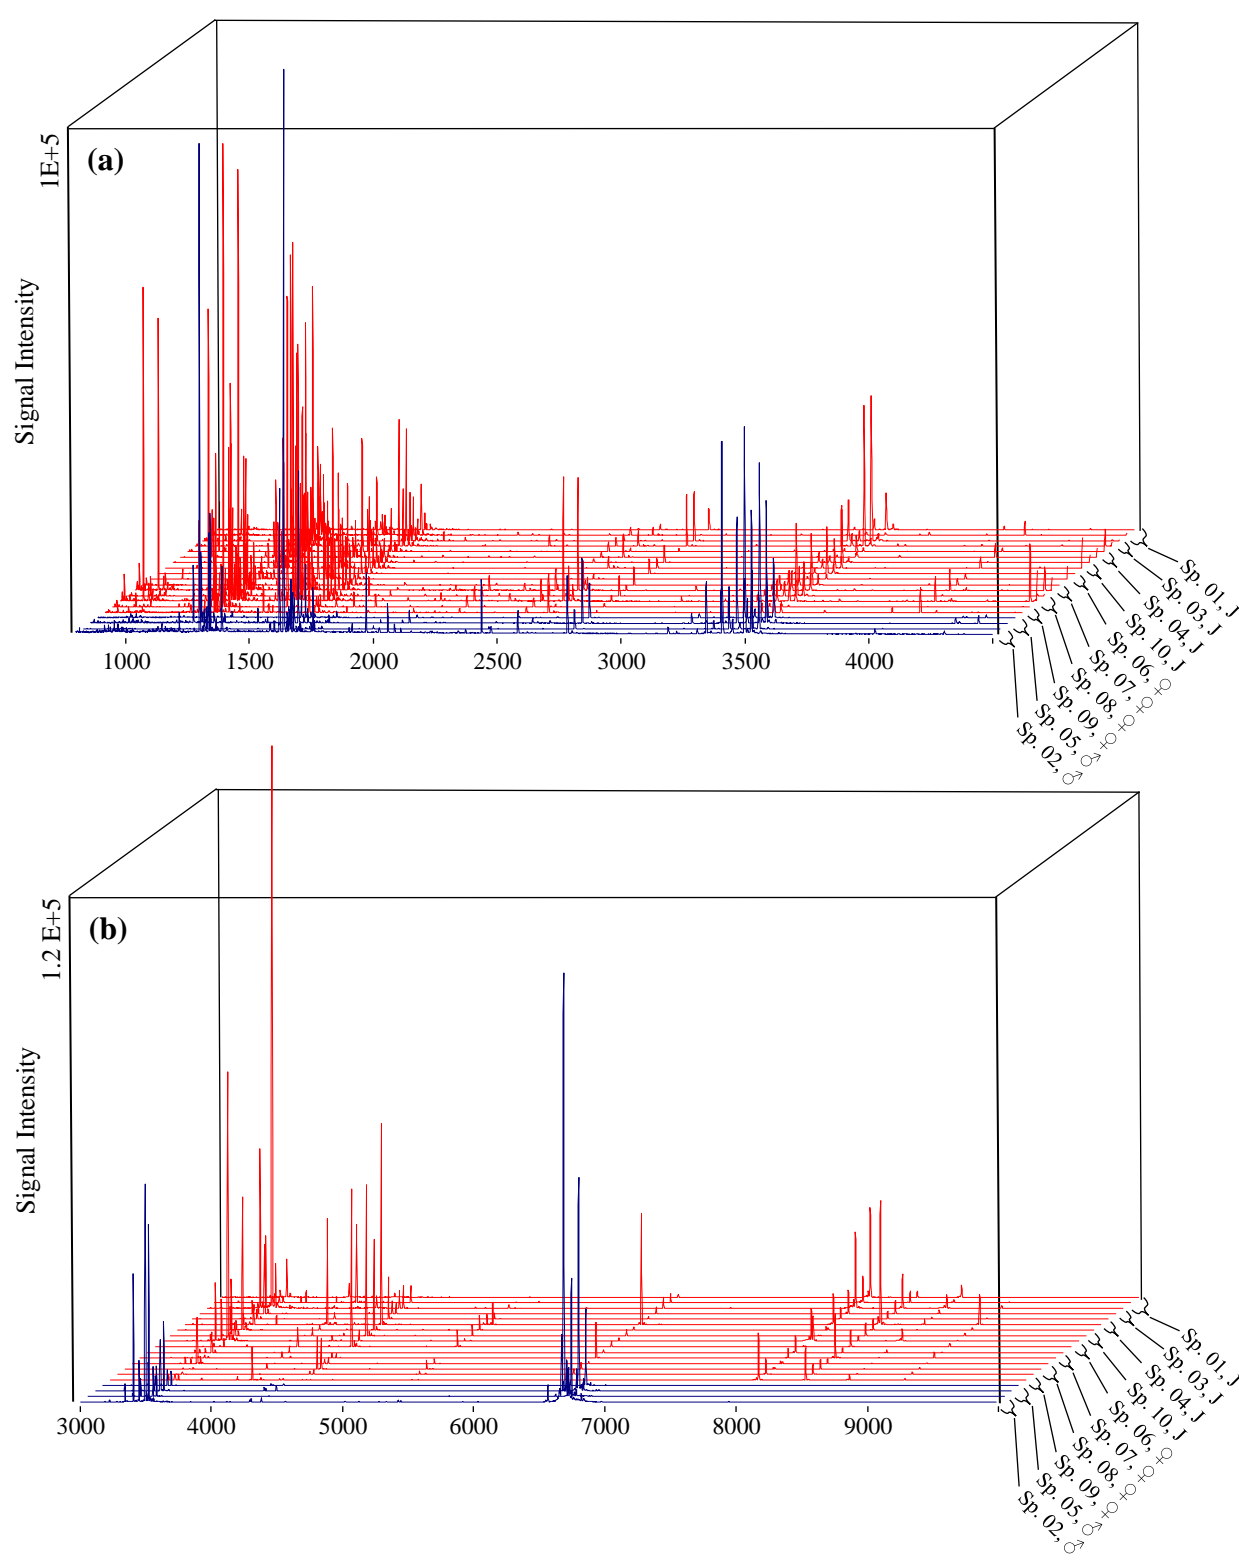

**Supplementary Material Figure S2:** Comparison of MALDI-TOF mass fingerprints (m/z 3000 – 10,000) of venom extracted from one specimen of *E. italicus* before (a) and after (b) transition to an adult male. Male-specific ion signals are highlighted in blue; ion signals that are missing in mass spectra of venom from males are highlighted in beige.

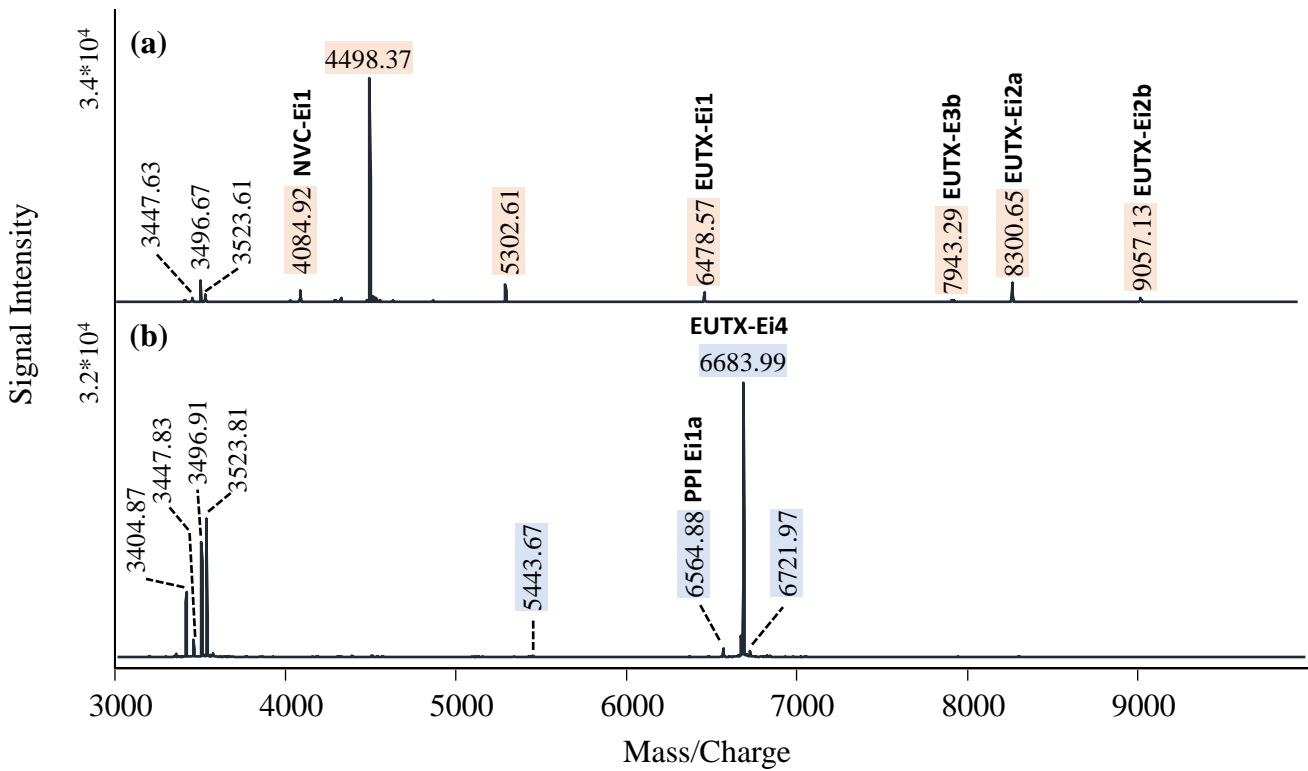

**Supplementary Material Figure S3:** Documentation of mating behavior for *E. italicus* (a) Promenade a deux (b) Sexual sting (c) Placement of the spermatophore (d) Close-up of the spermatophore.

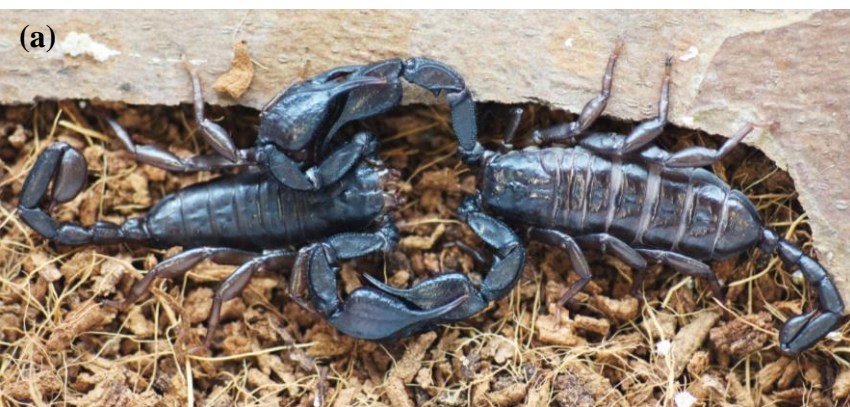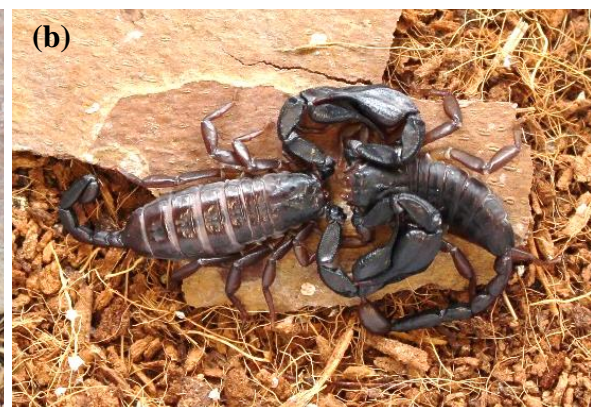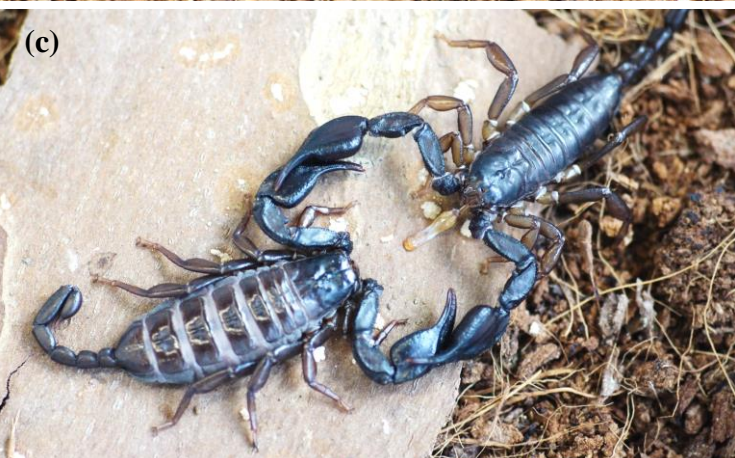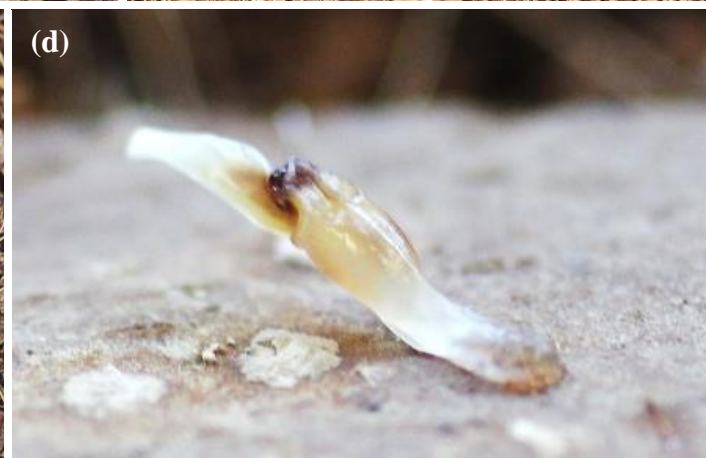

**Supplementary Material Figure S4:** To assess whether sex has a significant impact on the released venom amount from *E. italicus*, a linear model including specimens as fixed effects was applied, utilizing the software R (R Core Team (2022)). The venom amount was set as dependent variable with sex and maturity as explanatory variables. Venom was extracted from adult males (6 extractions; 2 specimens), adult females (12 extractions; 4 specimens), male juveniles (6 extractions; 2 specimens) and female juveniles (6 extractions; 2 specimens).

|                    |                       |
|--------------------|-----------------------|
| Observations       | 30                    |
| Dependent variable | Volume[μl]            |
| Type               | OLS linear regression |

|                     |       |
|---------------------|-------|
| F(10,20)            | 34.30 |
| R <sup>2</sup>      | 0.94  |
| Adj. R <sup>2</sup> | 0.92  |

|                 | Est. | S.E. | t val. | p    |
|-----------------|------|------|--------|------|
| Sex             | 0.50 | 0.24 | 2.12   | 0.05 |
| Maturity        | 0.67 | 0.24 | 2.83   | 0.01 |
| No. of groups:  |      |      |        |      |
| Specimen        | 10   |      |        |      |
| Standard errors | OLS  |      |        |      |

References

R Core Team (2022). R: A language and environment for statistical computing. R Foundation for Statistical Computing, Vienna, Austria.URL <https://www.R-project.org/>.
