# Supplementary material for: Equipped for Sexual Stings? Male-Specific Venom Peptides in Euscorpius italicus
Source: Int J Mol Sci. 2022 Sep 20;23(19):11020. doi: 10.3390/ijms231911020 (PMC9570025; doi:10.3390/ijms231911020)
Supplement: Supplementary file 1 [file ijms-23-11020-s001.zip › ijms-1887361-Supplementary Material Table S1.csv]

Name;Classification based on Similarity (BLAST hits with Uniprot toxins);Sex Specific (MALDI (Sex-specific signal: Corresponding MALDI signal only present in one sex)	Expressionlevel (regarded as sex-specific if expression level exceeds 100 tpm and is 10 times higher than in other sex)	Absence (no BLAST hit with Transcriptome/Orbitrap-data of other sex));Signal Peptide (Cleavage Side);Stop codon;Peaks Acc;Orbitrap run: Digestion Male: Specimen 2 (Coverage	Probability);Orbitrap run: Reduced Male: Specimen 2 (Coverage	Probability);Orbitrap run: Digestion Female: Specimen 9 (Coverage	Probability);Orbitrap run: Reduced Female: Specimen 9 (Coverage	Probability);TranscriptomeID Male;TranscriptomeID Female;Sequence Trinity;Sequence 6F ORF;Sequence Length ORF;BLAST_Negative Control (Blasthit	Identity	Length	Coverage);Expressionlevel Male (tpm);Expressionlevel Female (tpm);Expressionlevel Negative control (tpm);Blasthit with Uniprot Toxins (ID	Length);Description of Blast-hit with Uniprot Toxins;Quality of Blasthit with Uniprot Toxins (Identity	Alignment length	E-value);Blasthit with Uniprot Metazoa (ID	Length);Description of Blast-hit with Uniprot Metazoa;Quality of Blasthit with Uniprot Metazoa (Identity	Alignment length	E-value);Presence in other Sex (Orbitrapmatches	Transcriptome);BLAST_OtherSex_Orbitrapmatches(Blasthit	Identity	Length(Blastmatch)	Coverage(Query));BLAST_OtherSex_Transcriptome(Blasthit	Identity	Length(Blastmatch)	Coverage(Query));Gene Ontology terms (ID: Name [Class]);Interproscan results (Database/Analysis	Description	Accession	E-Value);Number of Cysteines;Number of Amino Acids (if a signal peptide is predicted	the length of the SP is substracted from the Amino Acid number);Theoretical Mass;MALDI matches with all precursor fractions considering signal peptide and potential cleavage sites	MALE;MALDI matches with all precursor fractions considering signal peptide and potential cleavage sites	FEMALE
U-Euscorpiustoxin-Ei1;Toxin;Female	MALDI+Expressionlevel;Signal Peptide	CS pos: 21-22. Pr: 0.9839	0.9839;Stop codon present;131	Digestion Sp2;31	113.61;36	134.40;55	146.04;68	231.53;>TRINITY_DN419_c0_g2_i1:False:1222;>TRINITY_DN1164_c0_g2_i2:False:1202;ACAATTAATCAAAGAAAGAAATGAAATAGTTAAAGAAAATGCTAAAATAATTGTTTATTTAATAAACTTTTAAGACGTTTCGATCCAATTTGTAGTTCACGCTAAATATGGATTTTATTCCTTTAACTTATTCGAAATAAAGTTTGTTTCTTTCATTACTTTTATACGCATTTTAATGCCAGTTCTTAATAAAAGGATAAGATGTAGAGAAACGTGCTCTCCAGAACATGGAATCATACGAAATTATGTCCAGTATGTTACTATGTAATTACGCTTAATAAAAATCAATTTATAACCAGGTAGACAATACTATTGATTCCT…	80; Putative Potassium channel toxin OS=Megacormus gertschi OX=1843536 PE=4 SV=1;63.291	79	2.78e-33;tr|A0A224XGQ4|A0A224XGQ4_9SCOR	80; Putative Potassium channel toxin OS=Megacormus gertschi OX=1843536 PE=4 SV=1;63.291	79	4.96e-30;Orbitrapmatches	Transcriptome;Insolution_Sp9Female	TRINITY_DN1164_c0_g2_i2:False:1202	100.000	79	1.0;Transcriptome_Sp9Female	TRINITY_DN1164_c0_g2_i2:False:1202	100.000	79	1.0;NA;ProSiteProfiles	BetaSPN-type cysteine-stabilized alpha/beta (CS-alpha/beta) domain profile.	9.998| Pfam	Potassium channel toxin	PF14866	2.3E-17;6;58;6485.02671;Mass: 6478.966709999998 (KKTFMEKAKSVFSKAGNKIKEIAGKSEYMCPVVSSFCEQHCARQEKSGECDFNKCTCS)	PTMs: C-C;Mass: 6478.966709999998 (KKTFMEKAKSVFSKAGNKIKEIAGKSEYMCPVVSSFCEQHCARQEKSGECDFNKCTCS)	PTMs: C-C
U-Euscorpiustoxin-Ei2a;Toxin;Female	MALDI+Confirmed;Signal Peptide	CS pos: 19-20. Pr: 0.9842	0.9842;Stop codon present;132	Digestion Sp2;43	113.2;56	164.76;52	168.51;64	311.96;>TRINITY_DN28153_c0_g1_i1:True:110;>TRINITY_DN694_c0_g1_i2:True:209;GTTGCAAGTATTCACAACTGGTATTAGTCACTAAGTTATTAGTTTCCAATAGAGAAACATGCGCAATCATTGGGGAATAGGTATATAAATGTTACTGGGTCTAAATCTAAACGTTACTTTACATCTGTCTTTTTTATTCTCAAAAGGATTTCCATCACATTCTGACTATCACCATTATGAATGCCAAACTAACTGTTCTACTTTTTCTGGCCATGGTGGCAATAGCTTCTTGTGGATGGATAAATGAGAAAAGGGTTCAAAGTTACATAGATGAGAAAATCCCTAACGGAGTTATGAAAGGGGCAATTAAAGCGGTGGTACATA…	98; Putative Sodium channel toxin OS=Megacormus gertschi OX=1843536 PE=4 SV=1;71.134	97	5.64e-48;tr|A0A224XBU0|A0A224XBU0_9SCOR	98; Putative Sodium channel toxin OS=Megacormus gertschi OX=1843536 PE=4 SV=1;71.134	97	1.01e-44;Orbitrapmatches	Transcriptome;Insolution_Sp9Female	TRINITY_DN694_c0_g1_i4:True:1	100.000	98	1.0;Transcriptome_Sp9Female	TRINITY_DN694_c0_g1_i1:True:526	100.000	98	1.0;NA;ProSiteProfiles	BetaSPN-type cysteine-stabilized alpha/beta (CS-alpha/beta) domain profile.	10.039| ProSiteProfiles	Prokaryotic membrane lipoprotein lipid attachment site profile.	PS51257	5.0| Pfam	Potassium channel toxin	PF14866	4.2E-11;6;79;8747.41056;Mass: 8301.05338 (GWINEKRVQSYIDEKIPNGVMKGAIKAVVHKIAKNEYGCVANIDTVSQCNKHCIAAGSEKGVCHGTKCKCDKELSY)	PTMs: C-C;Mass: 8301.05338 (GWINEKRVQSYIDEKIPNGVMKGAIKAVVHKIAKNEYGCVANIDTVSQCNKHCIAAGSEKGVCHGTKCKCDKELSY)	PTMs: C-C
U-Euscorpiustoxin-Ei2b;Antimicrobial peptide;Female	MALDI+Expressionlevel+Confirmed;Signal Peptide	CS pos: 19-20. Pr: 0.9741	0.9741;Stop codon present;134_2	Digestion Sp2;27	112.1;48	153.95;63	177.40;66	337.70;>TRINITY_DN2538_c0_g1_i5:False:1003;>TRINITY_DN6272_c0_g1_i2:True:68;CGCAACTCTTCAATACGAGTGTTAATAAGCTTTATTTTATACGCAAAGCACTTTCAAGTTACCAACACAAACTCGTCTTCAATGCAGAAACTGAACGAATTCAAATGCCGACAGATGCGAACATAAATAGTATTCTAGAACATTCACTGTTCGCTGGTGTAGTTAAACATTCACTGTTTAAACAAAATGTGCCGGTCCTTTACCAAGACTTATATTTAGTTCTTGGCAACTCATAACCAACTTATATTTATTTTCTGATTTTGAACAGACGTGTGTGCATTTACCTTCATATTTTAAGAGTAAATATCACAAATATCCATACT…	104; Antimicrobial peptide OS=Hadrurus spadix OX=141984 PE=4 SV=1;66.019	103	1.45e-48;tr|A0A1W7RB12|A0A1W7RB12_9SCOR	104; Antimicrobial peptide OS=Hadrurus spadix OX=141984 PE=4 SV=1;66.019	103	2.60e-45;Orbitrapmatches	Transcriptome;Insolution_Sp9Female	TRINITY_DN6272_c0_g1_i1:True:154	100.000	105	1.0;Transcriptome_Sp9Female	TRINITY_DN6272_c0_g1_i1:True:154	100.000	105	1.0;NA;Pfam	Potassium channel toxin	8.5E-9| ProSiteProfiles	Prokaryotic membrane lipoprotein lipid attachment site profile.	PS51257	5.0| ProSiteProfiles	BetaSPN-type cysteine-stabilized alpha/beta (CS-alpha/beta) domain profile.	PS51862	10.141;6;86;9446.85727;Mass: 9056.512390000002 (GILREKYFHQAVDKVAPMIPLPVVSQVVGNVAKQIVHKFAKNEALCMFNKDVAGMCDKSCKEAGKSNGICHGTKCKCDKPLSY)	PTMs: C-C;Mass: 9056.512390000002 (GILREKYFHQAVDKVAPMIPLPVVSQVVGNVAKQIVHKFAKNEALCMFNKDVAGMCDKSCKEAGKSNGICHGTKCKCDKPLSY)	PTMs: C-C
U-Euscorpiustoxin-Ei3a;Toxin;Female	MALDI+Confirmed;Signal Peptide	CS pos: 23-24. Pr: 0.9918	0.9918;Stop codon present;138	Digestion Sp2;39	110.1;18	53.82;68	161.56;54	204.69;>TRINITY_DN3428_c0_g1_i1:True:70;>TRINITY_DN1_c0_g1_i19:True:95;AGGATAAAGTGTACGTCATTATATGCATTAGAAAGCTGCGCGTAAAATGACGTTCTTCGTCGTCCAATGATTTTGCTTGTTCCCTCCAGATAAATATAAGTTATGGAAGCGGCCACAATTTACCGTTGTTTGTATAATTGCTGTGTTTGCCGTAATTATGAAGCGTTTACAGGTTGCTGCTCTTGTCTGTTTATTGCTGTGTGCCCTTTTTTCTTTATCGGCAGGGGCTGGCGAAATCTGCGAAGCAAATGGTTTGTCGATACCGGTCGGTCAGGACAAACAAGACCCAAAAAGTTGCGATTTGTACAAATGTATTATGCAAAATAAT…	100.000	70	1.0;8058.69;29307.7;2.73444;sp|L0GB04|LA1F_UROYA	104; La1-like protein 15 OS=Urodacus yaschenkoi OX=1273102 PE=2 SV=1;51.456	103	6.15e-33;tr|A0A224X3P2|A0A224X3P2_9SCOR	105; Putative La1-like peptide OS=Megacormus gertschi OX=1843536 PE=4 SV=1;69.903	103	7.52e-44;Orbitrapmatches	Transcriptome;Insolution_Sp9Female	TRINITY_DN1_c0_g1_i19:True:95	100.000	102	1.0;Transcriptome_Sp9Female	TRINITY_DN1_c0_g1_i19:True:95	100.000	102	1.0;NA;NA;8;79;8645.19649;Mass: 8637.116489999999 (AGEICEANGLSIPVGQDKQDPKSCDLYKCIMQNNRLVLDKFSCATLKRKRGCKIVPGDSKAAFPKCCPTSNCRGAQWDQ)	PTMs: C-C;Mass: 8637.116489999999 (AGEICEANGLSIPVGQDKQDPKSCDLYKCIMQNNRLVLDKFSCATLKRKRGCKIVPGDSKAAFPKCCPTSNCRGAQWDQ)	PTMs: C-C
U-Euscorpiustoxin-Ei3b;Toxin;Female	MALDI;Signal Peptide	CS pos: 24-25. Pr: 0.9821	0.9821;Stop codon present;114	Digestion Sp2;35	126.37;34	162.68;36	129.31;39	131.21;>TRINITY_DN1399_c0_g1_i4:True:0;>TRINITY_DN3660_c0_g2_i1:True:1;CAGGAACGTAAATTGAATTTAACTCTCATTTTTAATACCCAGAGGCCCAATGTTGTAAATGTACCCCATCAGCTAACTCTATTTGCTTCCGCCCGCGTAGTTATAAGTACTCGCGCACCTGGGAAACCATCCACGTCTATTATCATTAAAACTGCGTACCGCTTTGCAATTATGGAGAACGCACTCGGAGGTGTAATGTTGGGCAGTTTGCTCTTGCTGTCCTTGTTTTCCGCGTCGCTGGCAATTGGAGAAAAGTGCGAGACGGGACAGCATGTTATAGATGTGGGCAAACAGGTGCAGGATTCTAAAAGCTGTACTTTGTATAAAT…	98.969	97	0.9897959183673469;2320.13;18041.9;3.48932;sp|L0GCJ1|LA1D_UROYA	99; La1-like protein 13 OS=Urodacus yaschenkoi OX=1273102 PE=2 SV=1;57.143	98	3.31e-39;tr|A0A224X3N5|A0A224X3N5_9SCOR	99; Putative La1-like peptide OS=Megacormus gertschi OX=1843536 PE=4 SV=1;68.367	98	9.29e-45;Orbitrapmatches	Transcriptome;Insolution_Sp9Female	TRINITY_DN3660_c0_g2_i1:True:1	98.980	98	1.0;Transcriptome_Sp9Female	TRINITY_DN3660_c0_g2_i2:True:1	98.980	98	1.0;NA;NA;8;74;8008.86869;Mass: 7942.787229999999 (IGEKCETGQHVIDVGKQVQDSKSCTLYKCINYNRKYALETLTCASQKLKSGCRSIPGAANTPFPNCCPTVICQ)	PTMs: A	C-C	Mass: 1526.7493000000002 (IGEKCETGQHVIDV)	PTMs: A;NA
U-Euscorpiustoxin-Ei4;Toxin;Male	MALDI+Absence+Confirmed;Signal Peptide	CS pos: 23-24. Pr: 0.9796	0.9796;Stop codon present;26_2	Digestion Sp2;64	238.49;65	277.37;NA;NA;>TRINITY_DN201_c1_g1_i7:False:598;;GCAATTGGACATGGCGGTACTGCAAAAATGATTGCAATCCGAGAAAAAAAGATGCAGGGCTATTGTAAACAAGCAGGGCTGCCAAATTGAGCATGACAGAACCAAAACCTATGAATTGTGTAAATAAAAGTTTTTATTCTAGAATGATTCCCATATGTGTTAATGAGCCACCATAGTTAAACCTTTACAAAATTGTTTTCATATCTTCAAAGAAACACACTGTCAATACAGTTTTGCGCAATAAGTGTATAGTTTATTTTCTTCGAATATTGGTAAGGATAAGACTACATTTTACGATTTTACTCTGCCATAAGCAATTACACATGTATTCAGCCTTTCCATATCTTAACA…	46.512	86	0.8349514563106796;8482.11;NA;17.5355;tr|A0A1V1WBR1|A0A1V1WBR1_9SCOR	80; Putative Na+ channel toxin OS=Superstitionia donensis OX=311983 PE=4 SV=1;50.000	80	1.33e-21;tr|A0A1V1WBR1|A0A1V1WBR1_9SCOR	80; Putative Na+ channel toxin OS=Superstitionia donensis OX=311983 PE=4 SV=1;50.000	80	2.37e-18;;Insolution_Sp9Female	TRINITY_DN859_c0_g1_i1:False:385	97.500	80	1.0;Transcriptome_Sp9Female	TRINITY_DN859_c0_g1_i1:False:385	97.500	80	1.0;GO:0008200: ion channel inhibitor activity (molecular_function)| GO:0005576: extracellular region (cellular_component)| GO:0009405: pathogenesis (biological_process)| GO:0019871: sodium channel inhibitor activity (molecular_function);ProSiteProfiles	LCN-type cysteine-stabilized alpha/beta (CS-alpha/beta) domain profile.	14.094| SUPERFAMILY	Scorpion toxin-like	SSF57095	4.44E-14| Pfam	Scorpion toxin-like domain	PF00537	7.4E-7| Gene3D	-	G3DSA:3.30.30.10	2.5E-16;6;57;6748.00944;Mass: 6683.947979999999 (EKEGYPLDATRNIYQCYDLGENDYCEKKCKEFGGHGYCYGFACYCKYIRDDVKIWK)	PTMs: A	C-C	Mass: 3405.4834800000003 (CKEFGGHGYCYGFACYCKYIRDDVKIWKG)	PTMs: C-C;NA
U-Euscorpiustoxin-Ei4_variant;Toxin;Male	MALDI+Absence;Signal Peptide	CS pos: 23-24. Pr: 0.9814	0.9814;Stop codon present;26_3	Digestion Sp2;57	238.49;58	277.37;NA;NA;>TRINITY_DN201_c1_g1_i6:False:2129;;CGCTCTTTGAAATTTAAATGCTACATAACGTTGGACATTCTAATGCCATATCTTGCATTCTATGAGCCAGCACTCTCAGTTAATAACGCAATCATTCTCGAACCAATCTAAGAGAGCTGAAAGCTCGAAACAGGTTTGGCAGATTTGATGTTGGAGAAAAAATGTGTCCCTTCTAAAACCGAAATGTATTCGGTTTTAGAATTTTAAGTTTCCTTCATGCAATGAATGGTAGCAATGCGTCTTCAGAGTCTATGTTGGTTGGACATTTTTGCTGTTGTAAAATCCAGCCTGAATAAGCTGTTGTATAATATGACTGTTAAAAATGTTTTTATATTTTACATTTTTTGCTT…	39.796	98	0.9514563106796117;4.09613;NA;17.5355;tr|A0A1V1WBR1|A0A1V1WBR1_9SCOR	80; Putative Na+ channel toxin OS=Superstitionia donensis OX=311983 PE=4 SV=1;50.000	80	5.07e-21;tr|A0A1V1WBR1|A0A1V1WBR1_9SCOR	80; Putative Na+ channel toxin OS=Superstitionia donensis OX=311983 PE=4 SV=1;50.000	80	9.05e-18;;Insolution_Sp9Female	TRINITY_DN859_c0_g1_i1:False:385	96.250	80	1.0;Transcriptome_Sp9Female	TRINITY_DN859_c0_g1_i1:False:385	96.250	80	1.0;NA;NA;6;57;6748.00944;Mass: 6683.947979999999 (EKEGYPLDATRNIYQCYDLGENDYCEKKCKEFGGHGYCYGFACYCKYIRDDVKIWK)	PTMs: A	C-C	Mass: 3405.4834800000003 (CKEFGGHGYCYGFACYCKYIRDDVKIWKG)	PTMs: C-C;NA
U-Euscorpiustoxin-Ei4_variant;Toxin;Male	MALDI+Absence;Signal Peptide	CS pos: 23-24. Pr: 0.9796	0.9796;Stop codon present;26_5	Digestion Sp2;53	238.49;54	277.37;NA;NA;>TRINITY_DN201_c1_g1_i4:False:655;;GCAATTGGACATGGCGGTACTGCAAAAATGATTGCAATCCGAGAAAAAAAGATGCAGGGCTATTGTAAACAAGCAGGGCTGCCAAATTGAGCATGACAGAACCAAAACCTATGAATTGTGTAAATAAAAGTTTTTATTCTAGAATGATTCCCATATGTGTTAATGAGCCACCATAGTTAAACCTTTACAAAATTGTTTTCATATCTTCAAAGAAACACACTGTCAATACAGTTTTGCGCAATAAGTGTATAGTTTATTTTCTTCGAATATTGGTAAGGATAAGACTACATTTTACGATTTTACTCTGCCATAAGCAATTACACATGTATTCAGCCTTTCCATATCTTAACA…	42.391	92	0.8932038834951457;12.2398;NA;17.5355;tr|A0A1V1WBR1|A0A1V1WBR1_9SCOR	80; Putative Na+ channel toxin OS=Superstitionia donensis OX=311983 PE=4 SV=1;50.000	80	1.02e-21;tr|A0A1V1WBR1|A0A1V1WBR1_9SCOR	80; Putative Na+ channel toxin OS=Superstitionia donensis OX=311983 PE=4 SV=1;50.000	80	1.83e-18;;Insolution_Sp9Female	TRINITY_DN859_c0_g1_i1:False:385	97.500	80	1.0;Transcriptome_Sp9Female	TRINITY_DN859_c0_g1_i1:False:385	97.500	80	1.0;NA;NA;6;57;6748.00944;Mass: 6683.947979999999 (EKEGYPLDATRNIYQCYDLGENDYCEKKCKEFGGHGYCYGFACYCKYIRDDVKIWK)	PTMs: A	C-C	Mass: 3405.4834800000003 (CKEFGGHGYCYGFACYCKYIRDDVKIWKG)	PTMs: C-C;NA
U-Euscorpiustoxin-Ei4_variant;Toxin;Male	MALDI+Expressionlevel;Signal Peptide	CS pos: 23-24. Pr: 0.9811	0.9811;Stop codon present;26_6	Digestion Sp2;64	238.49;65	277.37;55	99.70;64	82.72;>TRINITY_DN201_c1_g1_i8:False:2096;>TRINITY_DN859_c0_g1_i1:False:385;CGCTCTTTGAAATTTAAATGCTACATAACGTTGGACATTCTAATGCCATATCTTGCATTCTATGAGCCAGCACTCTCAGTTAATAACGCAATCATTCTCGAACCAATCTAAGAGAGCTGAAAGCTCGAAACAGGTTTGGCAGATTTGATGTTGGAGAAAAAATGTGTCCCTTCTAAAACCGAAATGTATTCGGTTTTAGAATTTTAAGTTTCCTTCATGCAATGAATGGTAGCAATGCGTCTTCAGAGTCTATGTTGGTTGGACATTTTTGCTGTTGTAAAATCCAGCCTGAATAAGCTGTTGTATAATATGACTGTTAAAAAT…	46.512	86	0.8349514563106796;1961.83;60.9587;17.5355;tr|A0A1V1WBR1|A0A1V1WBR1_9SCOR	80; Putative Na+ channel toxin OS=Superstitionia donensis OX=311983 PE=4 SV=1;51.250	80	5.91e-22;tr|A0A1V1WBR1|A0A1V1WBR1_9SCOR	80; Putative Na+ channel toxin OS=Superstitionia donensis OX=311983 PE=4 SV=1;51.250	80	1.06e-18;Orbitrapmatches	Transcriptome;Insolution_Sp9Female	TRINITY_DN859_c0_g1_i1:False:385	98.750	80	1.0;Transcriptome_Sp9Female	TRINITY_DN859_c0_g1_i1:False:385	98.750	80	1.0;GO:0008200: ion channel inhibitor activity (molecular_function)| GO:0005576: extracellular region (cellular_component)| GO:0009405: pathogenesis (biological_process)| GO:0019871: sodium channel inhibitor activity (molecular_function);ProSiteProfiles	LCN-type cysteine-stabilized alpha/beta (CS-alpha/beta) domain profile.	14.094| SUPERFAMILY	Scorpion toxin-like	SSF57095	4.44E-14| Pfam	Scorpion toxin-like domain	PF00537	7.4E-7| Gene3D	-	G3DSA:3.30.30.10	2.5E-16;6;57;6748.00944;Mass: 6683.947979999999 (EKEGYPLDATRNIYQCYDLGENDYCEKKCKEFGGHGYCYGFACYCKYIRDDVKIWK)	PTMs: A	C-C	Mass: 3405.4834800000003 (CKEFGGHGYCYGFACYCKYIRDDVKIWKG)	PTMs: C-C;Mass: 6683.947979999999 (EKEGYPLDATRNIYQCYDLGENDYCEKKCKEFGGHGYCYGFACYCKYIRDDVKIWK)	PTMs: A	C-C	Mass: 3405.4834800000003 (CKEFGGHGYCYGFACYCKYIRDDVKIWKG)	PTMs: C-C
U-Euscorpiustoxin-Ei5;Toxin;Male	MALDI+Expressionlevel+Confirmed;Signal Peptide	CS pos: 20-21. Pr: 0.9817	0.9817;Stop codon present;232	Digestion Sp2;23	51.52;48	190.08;NA;NA;>TRINITY_DN7163_c0_g1_i1:True:149;>TRINITY_DN50413_c0_g1_i1:True:2;GCTTGGTTTATTGCGAAATTAATCTTGGAATAGCCAATGAGATTAGTTTTAAATTACTCATTGCAACAATTCAAAACAGAAAGATGACTGAAACACTCATCCTTCAATTTCTATATAATCACCATTTACTCTATATCGAATATTACTGAATACTGGTATTTGTAGAAAAAGGCAAAGTGATGAAAGGTGTAACGATGAACCTCATCATTATTTTCACGCTTTTACTTTCCAGCCCTTTCATAGAAGTTGAGGGTTCTCAAGTTAATGCAAGAGCATCGTGCACTAATTCTGGTGTCTGTCGAAGTTCCACCTGCCCTTC…	50.000	62	0.8157894736842105;1812.84;23.4752;163.269;tr|A0A1W7RB23|A0A1W7RB23_9SCOR	62; AKTx OS=Hadrurus spadix OX=141984 PE=4 SV=1;35.000	60	1.22e-07;NA;NA;NA;Transcriptome;Insolution_Sp9Female	TRINITY_DN15708_c0_g1_i3:False:1491	50.000	60	1.0;Transcriptome_Sp9Female	TRINITY_DN50413_c0_g1_i1:True:2	100.000	60	1.0;GO:0005576: extracellular region (cellular_component)| GO:0008200: ion channel inhibitor activity (molecular_function)| GO:0009405: pathogenesis (biological_process);Pfam	Scorpion short toxin	BmKK2	5.7E-6| SUPERFAMILY	Scorpion toxin-like	SSF57095	2.63E-5;8;40;4309.86251;Mass: 4301.782510000001 (SQVNARASCTNSGVCRSSTCPSRGCRSGKCINRKCTCYYC)	PTMs: C-C;NA
U-Euscorpiustoxin-Ei6;Toxin;Male	Absence;Signal Peptide	CS pos: 23-24. Pr: 0.9819	0.9819;Stop codon present;66_1	Digestion Sp2;54	172.53;57	195.07;NA;NA;>TRINITY_DN296_c1_g1_i3:False:408;;TTTTTTTTTTTTGCGCAATAAGTGTATAGTTTATTTTCTTCGAATACTAGTAAGGTAAAGACTACATTTTACGATTTTACTCTGCCATAAGGAATTACACATGTATTCACCCTTTCCATATCTTAACATCATCACGTATTCCTTTACAGTAGCAAGCGAATGCATAGCAATAACCATGCCCTCCAAAATCTTTGCAGCGCTTCTCACAGTAATCATTCTCACCCAACTCGTAACATTGGTATATAGAGCGACTTGCATCTATAGGATATCCATCCTTTTCACCATACACATCTTGAAATTCATAGATGAAGGTGACTAAACAAAACATAAAAACAGTACAGCATTTCATGA…	45.918	98	0.9514563106796117;3039.38;NA;17.5355;tr|A0A1V1WBR1|A0A1V1WBR1_9SCOR	80; Putative Na+ channel toxin OS=Superstitionia donensis OX=311983 PE=4 SV=1;52.500	80	6.23e-24;tr|A0A1V1WBR1|A0A1V1WBR1_9SCOR	80; Putative Na+ channel toxin OS=Superstitionia donensis OX=311983 PE=4 SV=1;52.500	80	1.11e-20;;Insolution_Sp9Female	TRINITY_DN690_c1_g1_i1:True:0	100.000	73	0.9125;Transcriptome_Sp9Female	TRINITY_DN690_c1_g1_i1:True:0	100.000	73	0.9125;NA;NA;6;57;6628.94717;NA;NA
U-Euscorpiustoxin-Ei7;Toxin;Unspecific;Signal Peptide	CS pos: 23-24. Pr: 0.9811	0.9811;Stop codon present;125_1	Digestion Sp2;54	119.56;NA;NA;NA;>TRINITY_DN201_c0_g1_i1:False:379;>TRINITY_DN3074_c0_g1_i2:False:378;TTTTTTTTTTTTTTTTGTGCAATAAGTGCATGCTTTATTTTCCTCAAATACTCATAACGTTAAGATTACATTCTGCATATCTCTGCCATAAAGAATTACACACCGATTTACCCTTCCCATACCTTAACATCATCATTCATTCCTTCACAGTAGCAACCGAAACCATAGCAATAACCATATGCTTTGTAGCGTCTGCAAATGGCCTCGCAGAATCTATTGTCACCCAACATGCCGGCAACACAATCATGTTTCATACCTTTCGTAGTCAGAGGATATCCATTCTTTCCGTGCACGTCTCCAAATTCATAAATGAA…	95.082	61	1.0;467.455;121.646;2.78033;tr|A0A224X3Y8|A0A224X3Y8_9SCOR	84; Putative Sodium channel toxin OS=Megacormus gertschi OX=1843536 PE=4 SV=1;72.840	81	1.47e-39;tr|A0A224X3Y8|A0A224X3Y8_9SCOR	84; Putative Sodium channel toxin OS=Megacormus gertschi OX=1843536 PE=4 SV=1;72.840	81	2.63e-36;Orbitrapmatches	Transcriptome;Insolution_Sp9Female	TRINITY_DN3074_c0_g1_i2:False:378	100.000	81	1.0;Transcriptome_Sp9Female	TRINITY_DN3074_c0_g1_i2:False:378	100.000	81	1.0;GO:0005576: extracellular region (cellular_component)| GO:0008200: ion channel inhibitor activity (molecular_function)| GO:0009405: pathogenesis (biological_process)| GO:0019871: sodium channel inhibitor activity (molecular_function);Pfam	Scorpion toxin-like domain	1.1E-6| Gene3D	-	G3DSA:3.30.30.10	1.6E-16| ProSiteProfiles	LCN-type cysteine-stabilized alpha/beta (CS-alpha/beta) domain profile.	PS51863	12.728| SUPERFAMILY	Scorpion toxin-like	SSF57095	9.27E-13;6;58;6585.88408;NA;NA
U-Euscorpiustoxin-Ei8;Other;Female	MALDI+Confirmed;Signal Peptide	CS pos: 20-21. Pr: 0.9801	0.9801;Stop codon present;119	Digestion Sp2;38	123.96;4	21.98;18	59.51;NA;>TRINITY_DN38071_c0_g1_i1:False:821;>TRINITY_DN49596_c0_g1_i1:False:809;ATGAATACGACTGCGTTGGCATCGCACGTGAACTTCTTTATTTCTCTTGATGATAACAGATGAACCAACAAAAACGGTTTATAAATAAAAATAAACGTAACGACCGAACAAATGACATTAAATACGATGAGAACAAAATGGAGGACGCTGGTGGCATTAAGTACATAGATTCGGAGTTATATTACACTCGATGAAGATGGTACAGCTGTGGAGGATATATCTTGGTGTGCAAGGAAGGATTTACTGTTGCGGACGTCATAGCTTACCGAGAGTGGGGCGCCTTCGCCGATTTATACGTATTTCGCAAGAACAACCGCT…	92.188	64	0.7032967032967034;104.191;38.9359;2.51089;tr|A0A2D4JH40|A0A2D4JH40_MICLE	214; Brain-derived neurotrophic factor (Fragment) OS=Micrurus lemniscatus lemniscatus OX=129467 PE=3 SV=1;30.556	72	0.031;tr|A0A1W7R976|A0A1W7R976_9SCOR	167; Venom protein OS=Hadrurus spadix OX=141984 PE=4 SV=1;82.635	167	1.87e-99;Orbitrapmatches	Transcriptome;Insolution_Sp9Female	TRINITY_DN49596_c0_g1_i1:False:809	100.000	167	1.0;Transcriptome_Sp9Female	TRINITY_DN49596_c0_g1_i1:False:809	100.000	167	1.0;NA;NA;7;147;17167.65367;Mass: 6478.29509 (RPSSVHGWKLGRRNRNWLWDSGIKKRSHTVFRNTQYAECCPSVTELVQPKGGVSKSG)	PTMs: C-C;Mass: 6478.29509 (RPSSVHGWKLGRRNRNWLWDSGIKKRSHTVFRNTQYAECCPSVTELVQPKGGVSKSG)	PTMs: C-C
U-Euscorpiustoxin-Ei9;Toxin;Unspecific;Signal Peptide	CS pos: 19-20. Pr: 0.9845	0.9845;Stop codon present;139	Digestion Sp2;47	109.19;NA;55	103.11;NA;>TRINITY_DN863_c0_g1_i3:True:0;>TRINITY_DN813_c0_g2_i3:True:0;TTTTTTTTTTTTTTTTTTATTATTTTTTTTTTTTTTTTTTTTTTTTTTTTTTTTTATTTTTTTTTTTTTTTTTTTTTTATATTTTTTTTTTTTTTTTTTTCATTAGCCAAGATGAAAGCAGGGTGTGCCCTGACGCTTTTCTTCCTGTTTATTTACGCCGTCAACGCGGCTCAGATCACCAGAACAACTTGCAGGACAAGAACGGGGATAATTTTAAGGGAAGGTGAAGAATGGAGAGACCCTCATTACTGTTCTATATATAGGTGCACTAATTACAACGGAGAGGCTGAACTCAATGGCCTGACATGTGCCGCTTATGGGATCCCA…	100.000	94	1.0;449.227;788.699;3.7772;sp|C5J895|LA1_OPICY	99; Venom toxin OcyC11 OS=Opisthacanthus cayaporum OX=573324 PE=1 SV=1;55.319	94	6.52e-33;tr|A0A224X3M2|A0A224X3M2_9SCOR	94; Putative La1-like peptide OS=Megacormus gertschi OX=1843536 PE=4 SV=1;72.917	96	1.45e-45;Orbitrapmatches	Transcriptome;Insolution_Sp9Female	TRINITY_DN813_c0_g2_i2:True:0	100.000	96	1.0;Transcriptome_Sp9Female	TRINITY_DN813_c0_g2_i2:True:0	100.000	96	1.0;NA;NA;8;77;8703.03194;NA;NA
U-Euscorpiustoxin-Ei10;Toxin;Male	Expressionlevel;Signal Peptide	CS pos: 23-24. Pr: 0.9795	0.9795;Stop codon present;159_3	Digestion Sp2;56	97.64;NA;22	55.49;NA;>TRINITY_DN3881_c2_g1_i5:False:936;>TRINITY_DN43210_c0_g1_i1:False:365;TAAACTACACAGTTAATAGTCTTTGGCTTAATTTTATTAAAACGGATATACAATTTCTTGATAGTGACAATCTAAATTTATTTTATGTATGATCGGATGTGGTTTGTCCATTTTTTACATTATTTCAATTAAAGTCTACAAATGTATCCTTAGTTATTTAATATCTTTCCAAAATTACTTCTCTGACAAAACAGATAAACTACTGATTGCTTTGGGAAAGCTATAAATTGTAATAAATATTGTATTCTCTATGCCCATGAAAGAATTAAATAACACTTGATTGGATTTACATTGCCAATGTTTGCTGTTAAATTGTTAA…	67; Neurotoxin alpha-KTx 30.1 OS=Scorpiops margerisonae OX=856992 PE=2 SV=1;37.736	53	3.33e-06;NA;NA;NA;Orbitrapmatches	Transcriptome;Insolution_Sp9Female	TRINITY_DN43210_c0_g1_i1:False:365	100.000	62	1.0;Transcriptome_Sp9Female	TRINITY_DN43210_c0_g1_i1:False:365	100.000	62	1.0;NA;NA;8;39;4570.04277;NA;NA
U-Euscorpiustoxin-Ei10_variant;Toxin;Male	Absence;Signal Peptide	CS pos: 25-26. Pr: 0.9780	0.9780;Stop codon present;159_4	Digestion Sp2;51	97.64;NA;NA;NA;>TRINITY_DN3881_c2_g1_i3:False:954;;TAAACTACACAGTTAATAGTCTTTGGCTTAATTTTATTAAAACGGATATACAATTTCTTGATAGTGACAATCTAAATTTATTTTATGTATGATCGGATGTGGTTTGTCCATTTTTTACATTATTTCAATTAAAGTCTACAAATGTATCCTTAGTTATTTAATATCTTTCCAAAATTACTTCTCTGACAAAACAGATAAACTACTGATTGCTTTGGGAAAGCTATAAATTGTAATAAATATTGTATTCTCTATGCCCATGAAAGAATTAAATAACACTTGATTGGATTTACATTGCCAATGTTTGCTGTTAAATTGTTAACCATTTTAGAATATATATTTTGTTTATTT…	63; Potassium channel toxin OS=Urodacus yaschenkoi OX=1273102 PE=2 SV=1;35.938	64	1.59e-05;NA;NA;NA;;Insolution_Sp9Female	TRINITY_DN43210_c0_g1_i1:False:365	91.837	49	0.765625;Transcriptome_Sp9Female	TRINITY_DN43210_c0_g1_i1:False:365	91.837	49	0.765625;NA;NA;8;39;4570.04277;NA;NA
U-Euscorpiustoxin-Ei11;Toxin;Unspecific;Signal Peptide	CS pos: 16-17. Pr: 0.9842	0.9842;Stop codon present;173	Digestion Sp2;29	89.22;54	151.81;29	97.41;46	140.26;>TRINITY_DN36_c0_g2_i3:True:114;>TRINITY_DN2_c0_g1_i1:True:73;CTAATAAATTAGCAGTTATAATACACTAAGCAGGTGTGGAGGATCGTTCAGGAAAAATTACAAGGTAAATTCCTTTAAACAGCCTCTGTTCCCAGAATATAAAAATGCTTATAAAACGTACAAATCTCTAGTTCGAAGCCAACCTACACAGCATCAAGCACAATGAAGACCGTTTTCATTCTGATTCTGCTGGCTATTGCCGTCGCCGCATCAGACAACTCGTTTGAGTGCGAGGAAGCAGGCGAATTCCAGCATCCTGACGACTGTACAAGTTTCATCATTTGCTATAACAAAACAGCCAGTCCACCAGTTAAATGCGGACCGGGCCTT…	31.325	83	0.07242582897033159;3670.09;9101.09;6.18954;sp|P0DPW3|TX11A_THELO	89; U-scoloptoxin(01)-Tl1a OS=Thereuopoda longicornis OX=353555 PE=3 SV=1;25.641	78	5.63e-06;tr|A0A1B3IJ08|A0A1B3IJ08_9SCOR	80; Venom peptide HtC6Tx1 OS=Hadogenes troglodytes OX=1577150 PE=2 SV=1;58.442	77	1.25e-22;Orbitrapmatches	Transcriptome;Insolution_Sp9Female	TRINITY_DN2_c0_g1_i1:True:73	100.000	79	1.0;Transcriptome_Sp9Female	TRINITY_DN2_c0_g1_i1:True:73	100.000	79	1.0;GO:0005576: extracellular region (cellular_component)| GO:0008061: chitin binding (molecular_function);SMART	chi_10	1.5E-8| ProSiteProfiles	Chitin-binding type-2 domain profile.	PS50940	12.277| Pfam	Chitin binding Peritrophin-A domain	PF01607	1.1E-12| SUPERFAMILY	Invertebrate chitin-binding proteins	SSF57625	3.4E-14| Gene3D	Antimicrobial Protein	G3DSA:2.170.140.10	8.3E-14;6;63;6899.98585;NA;NA
U-Euscorpiustoxin-Ei11_variant;Toxin;Female	Expressionlevel;Signal Peptide	CS pos: 16-17. Pr: 0.9842	0.9842;Stop codon present;173_1	Digestion Sp2;28	89.22;31	75.45;29	97.41;46	140.26;>TRINITY_DN36_c0_g2_i2:True:114;>TRINITY_DN2_c0_g1_i1:True:73;CTAATAAATTAGCAGTTATAATACACTAAGCAGGTGTGGAGGATCGTTCAGGAAAAATTACAAGGTAAATTCCTTTAAACAGCCTCTGTTCCCAGAATATAAAAATGCTTATAAAACGTACAAATCTCTAGTTCGAAGCCAACCTACACAGCATCAAGCACAATGAAGACCGTTTTCATTCTGATTCTGCTGGCTATTGCCGTCGCCGCATCAGACAACTCGTTTGAGTGCGAGGAAGCAGGCGAATTCCAGCATCCTGACGACTGTACAAGTTTCATCATTTGCTATAACAAAACAGCCAGTCCACCAGTTAAATGCGGACCGGGCCTT…	30.667	75	0.06544502617801047;116.849;9101.09;6.18954;sp|P0DPW3|TX11A_THELO	89; U-scoloptoxin(01)-Tl1a OS=Thereuopoda longicornis OX=353555 PE=3 SV=1;25.641	78	6.81e-06;tr|A0A1B3IJ08|A0A1B3IJ08_9SCOR	80; Venom peptide HtC6Tx1 OS=Hadogenes troglodytes OX=1577150 PE=2 SV=1;58.442	77	1.22e-22;Orbitrapmatches	Transcriptome;Insolution_Sp9Female	TRINITY_DN2_c0_g1_i4:True:73	100.000	85	1.0;Transcriptome_Sp9Female	TRINITY_DN2_c0_g1_i4:True:73	100.000	85	1.0;GO:0005576: extracellular region (cellular_component)| GO:0008061: chitin binding (molecular_function);SMART	chi_10	1.5E-8| ProSiteProfiles	Chitin-binding type-2 domain profile.	PS50940	12.277| Pfam	Chitin binding Peritrophin-A domain	PF01607	1.4E-12| Gene3D	Antimicrobial Protein	G3DSA:2.170.140.10	6.5E-14| SUPERFAMILY	Invertebrate chitin-binding proteins	SSF57625	4.71E-14;6;69;7699.42714;NA;NA
U-Euscorpiustoxin-Ei12;Toxin;Male	Expressionlevel;Signal Peptide	CS pos: 22-23. Pr: 0.9781	0.9781;Stop codon present;180_2	Digestion Sp2;17	85.12;15	62.22;16	38.98;NA;>TRINITY_DN307_c0_g1_i9:True:137;>TRINITY_DN1499_c0_g1_i1:False:366;ATAAAACGAATGCTGTTAATGGCATTGAAGTGCATTCGCTGTATGGAAAAATAGAGGAACAATTATTTTTATTGTCCTCTATAACTCAGAAAATTAAACTCTCGTAGAGTATATAAGCATTCGATGCTCTTCCATAAGCAACTACTTCAGCCGAAGAAATGAGCCTAGCAAAGAAGTTCACGATTCTACTTCTGGTGGCTTTAGTGATTTCTGTCACTTCAGGTCGATATGTTGCCGATTCGCTTGAAAACTACGATGAAAGGGATTCAGAAAGAGATCTTAAGAAGGGTGATCTTTATGACACTTGCGTTCGTCCCAGAAA…	76; Phi-liotoxin-Lw1a OS=Liocheles waigiensis OX=27399 PE=1 SV=1;47.826	69	2.68e-19;tr|T1DPA2|T1DPA2_UROMN	76; DDH-Uro-1 OS=Urodacus manicatus OX=1330407 PE=2 SV=1;52.174	69	1.25e-18;Orbitrapmatches	Transcriptome;Insolution_Sp9Female	TRINITY_DN1499_c0_g1_i1:False:366	100.000	71	1.0;Transcriptome_Sp9Female	TRINITY_DN1499_c0_g1_i1:False:366	100.000	71	1.0;NA;NA;4;49;5733.82898;NA;NA
U-Euscorpiustoxin-Ei13;Toxin;Unspecific;Signal Peptide	CS pos: 21-22. Pr: 0.9739	0.9739;Stop codon present;196_1	Digestion Sp2;35	72.02;42	105.36;52	93.88;55	109.70;>TRINITY_DN1268_c1_g3_i2:True:170;>TRINITY_DN409_c0_g1_i1:False:375;ACTTTGGTCTGAGTGACCGTTAATACTGAATTTAGCATCAAAATAACGTCGCTATTTGTCAAGAACCAATTAAAGCAGAGACAACAATATTATATATGAACAGCGTGATCATAAACCGTTTGCAGAACAAGTCACCATTTAAGTGGAAAGGCTTCCATACGATTGGGTAATATTTTAAAATGAAACTGTTCGTCATAACAATGGTCGCATATTTGTTGATGTGCACTGAAGAAGCTTTCTCGATGGACGAAAGAAATACGCTCGAGGAAACGTCACGAAAATGTATTCCAAGACAGGGAACCTGTACTCACAACATGAATGGAT…	38.750	80	0.7619047619047619;656.024;4082.31;58.1029;tr|A0A0K1D974|A0A0K1D974_9ARAC	82; Putative neurotoxin LTDF 04-02 OS=Dolomedes fimbriatus OX=1432569 PE=2 SV=1;31.507	73	8.34e-08;tr|A0A1W7R975|A0A1W7R975_9SCOR	78; Venom protein OS=Hadrurus spadix OX=141984 PE=4 SV=1;50.000	74	2.40e-19;Orbitrapmatches	Transcriptome;Insolution_Sp9Female	TRINITY_DN409_c0_g1_i1:False:375	100.000	74	1.0;Transcriptome_Sp9Female	TRINITY_DN409_c0_g1_i1:False:375	100.000	74	1.0;GO:0005576: extracellular region (cellular_component)| GO:0008200: ion channel inhibitor activity (molecular_function)| GO:0009405: pathogenesis (biological_process);CDD	Spider_toxin	1.84789E-4| Pfam	Spider toxin	PF02819	3.2E-7| SUPERFAMILY	omega toxin-like	SSF57059	3.91E-6| Gene3D	-	G3DSA:4.10.40.10	1.4E-5;8;53;5820.52817;NA;NA
U-Euscorpiustoxin-Ei14;Toxin;Unspecific;Signal Peptide	CS pos: 38-39. Pr: 0.9772	0.9772;Stop codon present;197_2	Digestion Sp2;34	71.77;40	100.86;16	39.90;41	78.59;>TRINITY_DN212_c0_g1_i1:False:484;>TRINITY_DN366_c0_g1_i15:True:501;TTTTTTTTTTTTTTCAATAATGCAATTTACGAATTTATTTATTTTTTACATTATATTTTTTCTGATTTATATAAACCGAGCTACAACCGATTCTTTGTGGTGTCCATGGACATTATTGATTTCCACAGGGCGTAGCTCTTTACACGGTAAGGTTCTTCCTCCACCTGGTGGCTTCCGTAGGAACTACAAGACGGTGCCAAGTTTCTAGCATAGGACGATCGAATATCTATATCCATCGAGTCATCTGGAAATATGTTTATCTTCTTGATACTCCTACGTTTTCTGTTGTAGTTGAAGCAGCATGCTCTAAACATGGCCGTTCCGC…	121; U-scoloptoxin(20)-Cw1a OS=Cormocephalus westwoodi OX=1096223 PE=2 SV=1;68.750	32	4.12e-12;tr|A0A6M2D970|A0A6M2D970_RHIMP	130; Putative secreted protein synganglion overexpressed OS=Rhipicephalus microplus OX=6941 PE=4 SV=1;64.583	48	4.01e-11;Orbitrapmatches	Transcriptome;Insolution_Sp9Female	TRINITY_DN366_c0_g1_i12:True:1233	100.000	134	1.0;Transcriptome_Sp9Female	TRINITY_DN366_c0_g1_i12:True:1233	100.000	134	1.0;NA;NA;7;96;10943.07075;NA;NA
U-Euscorpiustoxin-Ei15;Toxin;Female	Expressionlevel;Signal Peptide	CS pos: 21-22. Pr: 0.9822	0.9822;Stop codon present;214	Digestion Sp2;37	62.3;NA;38	53.94;21	72.49;>TRINITY_DN293_c0_g1_i1:False:844;>TRINITY_DN15708_c0_g1_i3:False:1491;ATATTTTAATACTATAATAGTTTTATTGTTTAACATATTATGCCGAAAAAGTCAATATTCTCTCTGGAATTCCACATAGCAGAGAACTGTTTTTGGCCACTGAATTTCTTTATTTTTACCCATACCAAGACAATTTAATTTAAGAATGATCAAACAAATAAAATCACTTTAAGCTGAGAAGCAAATATTATCTAAAGTTTTCTTCAATTCCTATAATAATGATTTGGGTTTAATTTCGCACCCTTACGTTTTATTAATATCATCAGTATCCACCAAAGAAAACGTTAATAGATTTTCAACTTTAATAGACTAACGATTAACA…	61.905	63	0.8289473684210527;27.4444;445.702;163.269;tr|A0A1B3IJ17|A0A1B3IJ17_9SCOR	57; Venom peptide HtKTx3 OS=Hadogenes troglodytes OX=1577150 PE=2 SV=1;55.932	59	2.41e-18;tr|A0A1B3IJ17|A0A1B3IJ17_9SCOR	57; Venom peptide HtKTx3 OS=Hadogenes troglodytes OX=1577150 PE=2 SV=1;55.932	59	4.30e-15;Orbitrapmatches	Transcriptome;Insolution_Sp9Female	TRINITY_DN15708_c0_g1_i3:False:1491	100.000	60	1.0;Transcriptome_Sp9Female	TRINITY_DN15708_c0_g1_i3:False:1491	100.000	60	1.0;GO:0005576: extracellular region (cellular_component)| GO:0008200: ion channel inhibitor activity (molecular_function)| GO:0009405: pathogenesis (biological_process);Pfam	Scorpion short toxin	BmKK2	1.0E-9| ProSitePatterns	Scorpion short toxins signature.	PS01138	-| Gene3D	-	G3DSA:3.30.30.10	6.5E-7| SUPERFAMILY	Scorpion toxin-like	SSF57095	2.31E-8;8;39;4367.9634;NA;NA
U-Euscorpiustoxin-Ei16;Toxin;Male	Absence;Signal Peptide	CS pos: 23-24. Pr: 0.9725	0.9725;No Stop codon present;251	Digestion Sp2;19	44.5;25	44.87;NA;NA;>TRINITY_DN296_c1_g1_i1:False:191;;GTCGCCCAACTCGTAACACTGGTATATATTACGAGTTGCATCTAAAGGATATCCATCCTTTTCACCATACACCTCTTGAAATTCATAGATGTAGGTGACTAAACAAAACATAAAAACAGTACAGCATTTCATGATGACAACATGTGTCTTCACAGCACGTACACCACACGGCCTGGAGTCAAACCAGGATCCTCACCTAAGTGCGGTGATGC;MKCCTVFMFCLVTYIYEFQEVYGEKDGYPLDATRNIYQCYELGD;44;TRINITY_DN1571_c0_g1_i5:True:20	46.939	49	0.47572815533980584;41.9769;NA;17.5355;tr|A0A224X3Y8|A0A224X3Y8_9SCOR	84; Putative Sodium channel toxin OS=Megacormus gertschi OX=1843536 PE=4 SV=1;51.282	39	1.11e-06;NA;NA;NA;;Insolution_Sp9Female	TRINITY_DN859_c0_g1_i2:False:385	86.364	44	1.0;Transcriptome_Sp9Female	TRINITY_DN859_c0_g1_i2:False:385	86.364	44	1.0;NA;NA;1;21;2463.09541;NA;NA
U-Euscorpiustoxin-Ei17;Toxin;Unspecific;Signal Peptide	CS pos: 21-22. Pr: 0.9829	0.9829;Stop codon present;71	Reduced Sp2;NA;51	68.74;38	82.21;56	146.01;>TRINITY_DN419_c0_g2_i2:False:339;>TRINITY_DN1164_c0_g2_i1:False:373;GTGATTAATAAATAAAGAGGACATTTGAACAGTAGCATGCTGTAATAATAACTATATCTATCACATTAGAAAAAGATGTATTCTTTGACACGAAGAGGGAAGATACATATTGGCATTGCTCTTAGATAACAGTGTTGGGTGGTTTATAATTCTCGTGCGCTTGAAGTAATTGGTTCAGAACTCCTCTTTTTTGAAACTTTTCAGTGGCACGCTCTTCTTTCGAGAATACACTTTTTGCTTTCTCCATAAAAGTTTTCTTTGCATCGACAAGTGAAGATATTAACATTATTACGAGAAATGCTGCAACAAGCTGTTTGACCATG…	80; Potassium channel toxin OS=Hemiscorpius lepturus OX=520031 PE=2 SV=1;68.571	35	6.84e-09;NA;NA;NA;Orbitrapmatches	Transcriptome;Insolution_Sp9Female	TRINITY_DN1164_c0_g2_i1:False:373	100.000	66	1.0;Transcriptome_Sp9Female	TRINITY_DN1164_c0_g2_i1:False:373	100.000	66	1.0;NA;NA;0;45;5290.83422;NA;NA
U-Euscorpiustoxin-Ei18;Toxin;Unspecific;Signal Peptide	CS pos: 18-19. Pr: 0.9821	0.9821;Stop codon present;52	Digestion Sp9;NA;NA;36	145.38;NA;>TRINITY_DN337_c0_g2_i1:True:0;>TRINITY_DN439_c0_g1_i1:True:23;AATTCGGCACAATAATCCAATGAAATCATTACGCAATACGTTCGTCAGAAACATATTGTTCTTCAGAACCGGTATTACCAACCATGAAGCTAAGGTTATTTATCATTACATGTTACACAATTACGTGTTCTTTGTCTTTAAATGATGATCCTAAACCACATATCATTTTTCCGGAAAAAGAGAAATCTATTTGCATTATTGGTAATAGCGATTGTATTCAACCCTTAAAAAGAATTCAGTGGTATATGACATATATACTCAATGTTGAGCGTTCAAAGGTTACGAAAGGTCAGTTTGAAAAACTACCTATTGCAACAAACATGTTA…	29.648	199	0.44222222222222224;21.2487;90.4432;35.7299;sp|A9QQ26|VA5_LYCSI	376; Venom allergen 5 OS=Lycosa singoriensis OX=434756 PE=2 SV=1;28.372	215	3.86e-15;tr|A0A1L4BJ74|A0A1L4BJ74_HEMLE	424; Venom toxin OS=Hemiscorpius lepturus OX=520031 PE=2 SV=1;30.803	461	1.03e-54;Transcriptome;Insolution_Sp2Male	TRINITY_DN42974_c0_g1_i1:True:0	30.151	199	0.44320712694877507;Transcriptome_Sp2Male	TRINITY_DN337_c0_g2_i1:True:0	99.777	449	1.0;NA;NA;17;431;49223.8576;NA;NA
U-Euscorpiustoxin-Ei19;Toxin;Female	Absence;Signal Peptide	CS pos: 23-24. Pr: 0.9821	0.9821;Stop codon present;106	Digestion Sp9;NA;NA;55	99.70;64	82.72;;>TRINITY_DN859_c0_g1_i2:False:385;TTTTTTTTTTTTTTACAGTTTTGCGCAATAAGTGTATAGTTTATTTTCTTCGAATATTGGTAAGGATAAGACTACATTTTACGATTTTACTCTGCCATAAGCAATTACACATGTATTCAGCCTTTCCATATCTTAACATCATCACGTATATATTTACAGTAGCAAGCGAATCCATAGCAATAACCATGCCCTCCAAACTCTTTGCATTTCTTCTCACAGTAATCATTCTCGCCCAAATCGTAACACTGGTATATATTACGAGTTGCATCTAAAGGATATCCCTCCTTTTCACCATACACATCTTGAAATTCATAGATGAAGGTGACTAAACAATACATGAAAACAGTACAGCACTTCA…	47.674	86	0.8349514563106796;;52.2503;17.5355;tr|A0A1V1WBR1|A0A1V1WBR1_9SCOR	80; Putative Na+ channel toxin OS=Superstitionia donensis OX=311983 PE=4 SV=1;51.250	80	9.68e-22;tr|A0A1V1WBR1|A0A1V1WBR1_9SCOR	80; Putative Na+ channel toxin OS=Superstitionia donensis OX=311983 PE=4 SV=1;51.250	80	1.73e-18;;Insolution_Sp2Male	TRINITY_DN201_c1_g1_i5:False:2169	95.000	80	1.0;Transcriptome_Sp2Male	TRINITY_DN201_c1_g1_i6:False:2129	95.000	80	1.0;GO:0008200: ion channel inhibitor activity (molecular_function)| GO:0005576: extracellular region (cellular_component)| GO:0009405: pathogenesis (biological_process)| GO:0019871: sodium channel inhibitor activity (molecular_function);ProSiteProfiles	LCN-type cysteine-stabilized alpha/beta (CS-alpha/beta) domain profile.	14.094| SUPERFAMILY	Scorpion toxin-like	SSF57095	4.44E-14| Gene3D	-	G3DSA:3.30.30.10	2.5E-16| Pfam	Scorpion toxin-like domain	PF00537	7.4E-7;6;57;6748.00944;NA;Mass: 6683.947979999999 (EKEGYPLDATRNIYQCYDLGENDYCEKKCKEFGGHGYCYGFACYCKYIRDDVKIWK)	PTMs: A	C-C	Mass: 3405.4834800000003 (CKEFGGHGYCYGFACYCKYIRDDVKIWKG)	PTMs: C-C
U-Euscorpiustoxin-Ei20;Toxin;Female	Absence;Signal Peptide	CS pos: 23-24. Pr: 0.9811	0.9811;Stop codon present;108_1	Digestion Sp9;NA;NA;38	99.30;NA;;>TRINITY_DN3074_c0_g1_i4:False:426;TTTTTTTTTTTTTTTGTGCAATAAGTGCATGCTTTATTTTCCTCAAATACTCATAACGTTAAGATTACATTCTGCATATCTCTGCCATAAAGAATTACACACCGATTTACCCTTCCCATACCTTAACATCATCATTCATTCCTTCACAGTAGCAACCGAAACCATAGCAATAACCATATGCTTTGTAGCGTCTGCAAATGGCCTCGCAGAATCTATTGTCACCCAACATGCCGGCAACACAATCATGTTTCATACCTTTCGTAGTCAGAGGATATCCATTCTTTCCGTGCACGTCTCCAAATTCATAAATGAAGGCGACTAAACAAAACATAAAAGCAGTACCGCGTTTCATGA…	95.082	61	1.0;;1.99595;2.78033;tr|A0A224X3Y8|A0A224X3Y8_9SCOR	84; Putative Sodium channel toxin OS=Megacormus gertschi OX=1843536 PE=4 SV=1;72.840	81	1.51e-39;tr|A0A224X3Y8|A0A224X3Y8_9SCOR	84; Putative Sodium channel toxin OS=Megacormus gertschi OX=1843536 PE=4 SV=1;72.840	81	2.69e-36;;Insolution_Sp2Male	TRINITY_DN201_c0_g1_i1:False:379	97.531	81	1.0;Transcriptome_Sp2Male	TRINITY_DN201_c0_g1_i1:False:379	97.531	81	1.0;NA;NA;6;58;6585.88408;NA;NA
U-Euscorpiustoxin-Ei21;Toxin;Unspecific;Signal Peptide	CS pos: 23-24. Pr: 0.9830	0.9830;Stop codon present;138	Digestion Sp9;NA;NA;60	84.90;NA;>TRINITY_DN39073_c0_g1_i1:False:516;>TRINITY_DN6_c0_g1_i1:False:518;TTTTTTTTTTTTAATTTAATAATGTTTTTTTAATAAAACAAAATCCCATTACAATTACAACATATATATTTAGCTATTTTGCAAACAGTGTAACATGCAAGTGAATGACATGATTACACTTGGTTATTTAAAGCCATAAACGTTTATCTTTATGTTAACGTGTATGTTTTAATTTCCTTAGCACACGACTTTAGGACAACAGTCAGGATAGTGGCCAGGATTTTCGACTATCCTACATCCACCAGCCGGATGCAAGTCTCCAGGACAGTCTGTGCTAATTAGAAACAACCAGCTGCTATTCGATTCCGATTTCTCGCAATCC…	98.214	112	0.8818897637795275;63.3468;440.335;179.22;sp|L0GCW8|TXUE_UROYA	105; Toxin-like protein 14 OS=Urodacus yaschenkoi OX=1273102 PE=2 SV=1;36.697	109	1.19e-16;sp|L0GCW8|TXUE_UROYA	105; Toxin-like protein 14 OS=Urodacus yaschenkoi OX=1273102 PE=2 SV=1;36.697	109	2.13e-13;Transcriptome;No hits in Other Sex;Transcriptome_Sp2Male	TRINITY_DN39073_c0_g1_i1:False:516	100.000	107	1.0;NA;Pfam	Single domain von Willebrand factor type C	3.2E-8| SMART	SVWC_2	SM01318	0.0049;8;84;9323.21726;NA;NA
U-Euscorpiustoxin-Ei22;Toxin;Unspecific;Signal Peptide	CS pos: 21-22. Pr: 0.9829	0.9829;Stop codon present;145	Digestion Sp9;NA;NA;38	82.21;56	146.01;>TRINITY_DN419_c0_g2_i2:False:339;>TRINITY_DN1164_c0_g2_i1:False:373;TTTTTTTTTTTTCTGCTTCTCAACTCTCTTTATTGTGATTAATAAATAAAGAGGACATTTGAACAGTAGCATGCTGTAATAATAACTATATCTATCACATTAGAAAAAGATGTATTCTTTGACACGAAGAGGGAAGATACATATTGGCATTGCTCTTAGATAACAGTGTTGGGTGGTTTATAATTCTCGTGCGCTTGAAGTAATTGGTTCAGAACTCCTCTTTTTTGAAACTTTTCAGTGGCACGCTCTTCTTTCGAGAATACACTTTTTGCTTTCTCCATAAAAGTTTTCTTTGCATCGACAAGTGAAGATATTAACATTAT…	80; Potassium channel toxin OS=Hemiscorpius lepturus OX=520031 PE=2 SV=1;68.571	35	6.84e-09;NA;NA;NA;Transcriptome;Insolution_Sp2Male	TRINITY_DN419_c0_g2_i1:False:1222	100.000	35	0.5303030303030303;Transcriptome_Sp2Male	TRINITY_DN419_c0_g2_i2:False:339	100.000	66	1.0;NA;NA;0;45;5290.83422;NA;NA
U-Euscorpiustoxin-Ei23;Toxin;Female	Absence;Signal Peptide	CS pos: 23-24. Pr: 0.9818	0.9818;Stop codon present;164	Digestion Sp9;NA;NA;35	75.01;NA;;>TRINITY_DN3074_c0_g1_i1:False:667;CTCACATACATAGATTTTGAAATAATACTATAAGTGGTTATTGCACATTGAAATCAAAAGATGTGTTCATGTTACATGTGTTGTTAAGATTGGTTGAGTGTAACATCAAGAAATGTTTTTAAAGTTATGTTTAGTCACAATGAATATGTGAAAGAAAATCACTAATGGCAATATTTTAGTAAAAAACACTAAATCCAAAATTAGGTAAAAATTTATAACATTGATGTCATATCGTCAATACTGTTTTGTCGTGCAATAAATGTGTAATGTATTTTCCTTAAACACTTATAACTTTTACATAAAGATTACATTCTATCTATCTTTGCCATAAAGAATTGCACACCGTTTCAACCT…	95.082	61	1.0;;6.71641;2.78033;tr|A0A224X3Y8|A0A224X3Y8_9SCOR	84; Putative Sodium channel toxin OS=Megacormus gertschi OX=1843536 PE=4 SV=1;74.074	81	8.07e-40;tr|A0A224X3Y8|A0A224X3Y8_9SCOR	84; Putative Sodium channel toxin OS=Megacormus gertschi OX=1843536 PE=4 SV=1;74.074	81	1.44e-36;;Insolution_Sp2Male	TRINITY_DN201_c0_g1_i1:False:379	95.062	81	1.0;Transcriptome_Sp2Male	TRINITY_DN201_c0_g1_i1:False:379	95.062	81	1.0;GO:0005576: extracellular region (cellular_component)| GO:0008200: ion channel inhibitor activity (molecular_function)| GO:0009405: pathogenesis (biological_process)| GO:0019871: sodium channel inhibitor activity (molecular_function);Pfam	Scorpion toxin-like domain	2.7E-7| ProSiteProfiles	LCN-type cysteine-stabilized alpha/beta (CS-alpha/beta) domain profile.	PS51863	13.464| Gene3D	-	G3DSA:3.30.30.10	5.2E-17| SUPERFAMILY	Scorpion toxin-like	SSF57095	6.74E-13;6;58;6563.85211;NA;NA
U-Euscorpiustoxin-Ei24;Toxin;Unspecific;Signal Peptide	CS pos: 23-24. Pr: 0.9817	0.9817;Stop codon present;183	Digestion Sp9;NA;NA;39	65.13;NA;>TRINITY_DN1803_c0_g2_i3:True:2;>TRINITY_DN690_c0_g1_i2:True:59;CCTAATTCTAATGGTATATAAGCCAAAGAAATTGATAGTGTAGCATTAGTTCCTGGTAACAGCAAAACTATCTTCAAGCAACACCCTCATTGGACGCTGAACGGAGGAAACGTCTCGTTATCATGAAAGGCTCTACTGCTTTTATGTTTTGTGTATTCATCTTTATTTATGAATTTGGAGATGTGTGTGGTAGCAAGGATGGATATCCTAAGAATGATCGAGGCGCTGCATTTAGATGTGGCACGTTGGGCAAAAGTGATTACTGTGAGGGCGTCTGCAAACGTTACAATGGGTACGGTTATTGTTATGCATGGAGTTGCTACTGT…	99.029	103	1.0;110.758;523.907;17.5355;tr|A0A224X3Y8|A0A224X3Y8_9SCOR	84; Putative Sodium channel toxin OS=Megacormus gertschi OX=1843536 PE=4 SV=1;49.383	81	4.25e-20;tr|A0A224X3Y8|A0A224X3Y8_9SCOR	84; Putative Sodium channel toxin OS=Megacormus gertschi OX=1843536 PE=4 SV=1;49.383	81	7.58e-17;Transcriptome;Insolution_Sp2Male	TRINITY_DN296_c1_g1_i3:False:408	53.165	79	0.9634146341463414;Transcriptome_Sp2Male	TRINITY_DN1803_c0_g2_i3:True:2	98.780	82	1.0;NA;NA;6;59;6604.90678;NA;NA
U-Euscorpiustoxin-Ei25;Toxin;Unspecific;Signal Peptide	CS pos: 23-24. Pr: 0.9830	0.9830;Stop codon present;194	Digestion Sp9;NA;NA;27	61.92;NA;>TRINITY_DN360_c0_g1_i1:True:65;>TRINITY_DN6_c0_g2_i1:False:634;TTTTTTTTTTTTTAATTTGATATTTATTTATTTAAATTAAAATCACACTAACATTTATATATGTACATGGGTCAGAAGTCTGTTACCATTATATTAATAATTAAGTGTTTACCATATTCCTTTTAGGAAGGTCATCACATCATACTTCATCAATGCTTTGATATCTTCCTTAGCTTGTTGGACTTTGCAATTAACGTAATATGTTAGCGCCTTACATGATTAACTTGATTATATAAAGCCACAAACTTTCTATAATAAGCTGCATTTCGACTTTCGAGCAGTTGAAGTTTATGCATTTATCTGGTGTAGCAGTTGGGAGTCGAACA…	100.000	112	1.0;17.2025;74.2212;28.1765;sp|L0GCW8|TXUE_UROYA	105; Toxin-like protein 14 OS=Urodacus yaschenkoi OX=1273102 PE=2 SV=1;43.810	105	1.10e-24;tr|A0A1W7R989|A0A1W7R989_9SCOR	96; Venom protein OS=Hadrurus spadix OX=141984 PE=4 SV=1;54.945	91	1.71e-25;Transcriptome;Insolution_Sp2Male	TRINITY_DN863_c0_g1_i1:True:0	30.000	60	0.5660377358490566;Transcriptome_Sp2Male	TRINITY_DN360_c0_g1_i1:True:65	100.000	106	1.0;NA;Pfam	Single domain von Willebrand factor type C	4.8E-10| SMART	SVWC_2	SM01318	3.0E-9;8;83;9146.1006;NA;NA
U-Euscorpiustoxin-Ei26;Toxin;Female	Absence;Signal Peptide	CS pos: 24-25. Pr: 0.9787	0.9787;Stop codon present;217	Digestion Sp9;NA;NA;19	54.16;NA;;>TRINITY_DN690_c0_g1_i1:True:59;CCTAATTCTAATGGTATATAAGCCAAAGAAATTGATAGTGTAGCATTAGTTCCTGGTAACAGCAAAACTATCTTCAAGCAACACCCTCATTGGACGCTGAACGGAGGAAACGTCTCGTTATCATGAAAGGCTCTACTGCTTTTATGTTTTGTGTATTCGTCTTCATTTATGAATTTCGAGATATGTGTTGTAGCAAGGATGGATATCCTGCGAATAATAAAGGCACTGTATTTGGATGTGGCACGTTGGGCAAAAATCATTACTGTGAGGGCGTCTGCAAACGTTACAATGGGTACGGTTATTGTTATGCATGGAGTTGCTACTGTGAAGGAATCGATGATGATACCGAGTTAGCGA…	99.038	104	1.0;;133.941;9.04538;tr|A0A224X3Y8|A0A224X3Y8_9SCOR	84; Putative Sodium channel toxin OS=Megacormus gertschi OX=1843536 PE=4 SV=1;45.679	81	1.14e-18;tr|A0A224X3Y8|A0A224X3Y8_9SCOR	84; Putative Sodium channel toxin OS=Megacormus gertschi OX=1843536 PE=4 SV=1;45.679	81	2.03e-15;;Insolution_Sp2Male	TRINITY_DN296_c1_g1_i3:False:408	51.948	77	0.927710843373494;Transcriptome_Sp2Male	TRINITY_DN1803_c0_g2_i2:True:2	96.386	83	1.0;NA;NA;6;59;6531.73765;NA;NA
U-Euscorpiustoxin-Ei26_variant;Toxin;Female	Absence;Signal Peptide	CS pos: 24-25. Pr: 0.9787	0.9787;Stop codon present;217_1	Digestion Sp9;NA;NA;19	54.16;NA;;>TRINITY_DN690_c0_g1_i3:True:59;CCTAATTCTAATGGTATATAAGCCAAAGAAATTGATAGTGTAGCATTAGTTCCTGGTAACAGCAAAACTATCTTCAAGCAACACCCTCATTGGACGCTGAACGGAGGAAACGTCTCGTTATCATGAAAGGCTCTACTGCTTTTATGTTTTGTGTATTCGTCTTCATTTATGAATTTCGAGATATGTGTTGTAGCAAGGATGGATATCCTGCGAATAATAAAGGCACTGTATTTGGATGTGGCACGTTGGGCAAAAATCATTACTGTGAGGGCGTCTGCAAACGTTACAATGGGTACGGTTATTGTTATGCATGGAGTTGCTACTGTGAAGGAATCGATGATGATACCGAGTTAGCGA…	98.058	103	0.9903846153846154;;8.57923;9.04538;tr|A0A224X3Y8|A0A224X3Y8_9SCOR	84; Putative Sodium channel toxin OS=Megacormus gertschi OX=1843536 PE=4 SV=1;45.679	81	1.03e-18;tr|A0A224X3Y8|A0A224X3Y8_9SCOR	84; Putative Sodium channel toxin OS=Megacormus gertschi OX=1843536 PE=4 SV=1;45.679	81	1.84e-15;;Insolution_Sp2Male	TRINITY_DN296_c1_g1_i3:False:408	51.948	77	0.927710843373494;Transcriptome_Sp2Male	TRINITY_DN1803_c0_g2_i2:True:2	95.122	82	0.9879518072289156;NA;NA;6;59;6513.79985;NA;NA
U-Euscorpiustoxin-Ei27;Toxin;Female	Expressionlevel;Signal Peptide	CS pos: 24-25. Pr: 0.9722	0.9722;Stop codon present;237	Digestion Sp9;NA;NA;30	46.76;NA;>TRINITY_DN34792_c0_g1_i1:False:274;>TRINITY_DN41133_c0_g1_i1:False:302;TTTTTTTTATATTTTATAAATTATTTATTCATTTGAAACATTTATATGTAACATAAAGCTGTGCACTTTACAAAGAGACATCTATAAATGTCATAACATTAGAGTGCAACACATTTCTCCCGCTGGGCATTTCACGGAATTTGTCTCTTGTCTGATTTTTGGATGACAGTACGTCATACACACACCAGTCTCGCTGCAATTATCAAAACTTGCATCTTTGGCAGCTTCGCTTGTACTAAGCACGGCTCCTGCTATCAGTAGAGAGAAAACAAAGAAAACACGTACGGCAACCATGTTTGTACACTAACAACTTATGTG…	48.276	29	0.3625;10.6532;137.931;70.0163;sp|P0DL62|KA311_BUTOC	40; Potassium channel toxin alpha-KTx 31.1 OS=Buthus occitanus tunetanus OX=6871 PE=1 SV=1;62.162	37	4.31e-10;tr|B8XH49|B8XH49_BUTOS	66; Putative toxin Tx277 OS=Buthus occitanus israelis OX=539894 PE=2 SV=1;51.515	66	6.03e-16;Transcriptome;No hits in Other Sex;Transcriptome_Sp2Male	TRINITY_DN34792_c0_g1_i1:False:274	100.000	67	1.0;NA;NA;6;43;4715.01492;NA;NA
U-Euscorpiustoxin-Ei28;Toxin;Female	Expressionlevel;Signal Peptide	CS pos: 24-25. Pr: 0.9800	0.9800;Stop codon present;264	Digestion Sp9;NA;NA;25	39.44;17	38.83;>TRINITY_DN5314_c0_g1_i2:True:51;>TRINITY_DN544_c0_g1_i5:True:296;ATATATTCGGTGTTTGAGTAATCTGGATTCACATAAAAACAAACAAATTGTCCTGAATGTTATAATCTTGCAAAACAGTAAAGGCTATTGGAGCAAGATGGTAGCTGAAGATCTGAAGAAAACCATTCTGCTATGAAAAGAACATTCATCATCATCATCATGAACAGATGCGGTTTAGATCCTAGGACATGTTCTGCTTAAGGCTTGAGGTGCCCCTGGTCTTTCCTTCTTCTTGGACGACCTACGGCCCTCATCCTTCTTGGTTGGTATCTGAAGGCCATTTCTGAATCTATTAACGAGAAATGAATAAGAAGTTTATTCCCATCC…	64; Putative Potassium channel toxin OS=Megacormus gertschi OX=1843536 PE=4 SV=1;65.079	63	1.57e-23;tr|A0A224XGD9|A0A224XGD9_9SCOR	64; Putative Potassium channel toxin OS=Megacormus gertschi OX=1843536 PE=4 SV=1;65.079	63	2.81e-20;Transcriptome;Insolution_Sp2Male	TRINITY_DN3881_c2_g1_i5:False:936	32.787	61	0.9682539682539683;Transcriptome_Sp2Male	TRINITY_DN5314_c0_g1_i2:True:51	100.000	63	1.0;GO:0005576: extracellular region (cellular_component)| GO:0008200: ion channel inhibitor activity (molecular_function)| GO:0009405: pathogenesis (biological_process);ProSitePatterns	Scorpion short toxins signature.	-| Gene3D	-	G3DSA:3.30.30.10	5.4E-5| SUPERFAMILY	Scorpion toxin-like	SSF57095	1.62E-6| Pfam	Scorpion short toxin	BmKK2	PF00451	5.1E-6;8;39;4431.83054;NA;NA
U-Euscorpiustoxin-Ei29;Toxin;Female	MALDI+Absence;Signal Peptide	CS pos: 22-23. Pr: 0.9887	0.9887;Stop codon present;291	Digestion Sp9;NA;NA;16	32.18;NA;;>TRINITY_DN1499_c0_g1_i2:False:345;TTTTTTTTTTCGATTGCATTAATTAACTTTATTTAAACATTTTTTGTTTTAACAATAATTAACTCACAATCATCTAGTAACTGTCGTACAATCAGAAGACTATCTTGATTTATAAGACTTAGGCTTTGACACAAATTTGTGACTTGTTGCAACGCAGACCGGGTTTACATTTTCTGGGAGGAACGCAAGAGTCATAAAGATTACCCTTCTGAAGTTCTCTTTTTAAGTCCCTTTCTTCGTAGTTTTCAAGAGATTCGGCAACATGTCGACCTGAAATGACAGAAATCACTAAAGCCACCAGAAGTAGAATCGTGAACTTCTTTGCTAGGCTCATTTCTTCGGCTGAAG;MSLAK…	76; Phi-liotoxin-Lw1a OS=Liocheles waigiensis OX=27399 PE=1 SV=1;46.377	69	1.51e-17;tr|T1DPA2|T1DPA2_UROMN	76; DDH-Uro-1 OS=Urodacus manicatus OX=1330407 PE=2 SV=1;49.275	69	7.73e-18;;Insolution_Sp2Male	TRINITY_DN307_c0_g1_i9:True:137	84.507	71	1.0;Transcriptome_Sp2Male	TRINITY_DN307_c0_g1_i9:True:137	84.507	71	1.0;NA;NA;4;49;5700.89152;NA;Mass: 1859.87036 (RHVAESLENYEERDL)	PTMs:
U-Euscorpiustoxin-Ei30;Toxin;Female	Expressionlevel;Signal Peptide	CS pos: 25-26. Pr: 0.9706	0.9706;Stop codon present;71_1	Reduced Sp9;NA;NA;NA;16	68.75;>TRINITY_DN33155_c0_g1_i1:False:527;>TRINITY_DN6735_c0_g1_i1:False:529;TTTTTTTTTTCTCTTATAATCACGTTTAATTTCGTAAAGATGATTTTGTTGCGATTACCTGACGAATGTATACATAAAATTGGGTTTATTCGGAATTATTAATAACTGAATGTTTGCATAAAAGACTAAATGTAACATTTGCATTCAGAACTACTACTTCCGACGCATTTCCCCTTTCTTCCAAACTGACCCCTTCTGCAATAACCGCTGCATAACTTTTGACTCAGAGGACAACCCGCCGATATCCCGTCGATGACAGCCACTTCGCATGTGAAGATGACCATCACCGAAATCAGAATGTAGAAACACAATTTATTCATCT…	95.714	70	0.7291666666666666;33.4407;527.657;3.06577;sp|A9QLM3|KA11L_LYCMC	66; Toxin KTx8 OS=Lychas mucronatus OX=172552 PE=2 SV=1;40.000	65	8.62e-10;tr|A0A224XGT0|A0A224XGT0_9SCOR	70; Putative Potassium channel toxin OS=Megacormus gertschi OX=1843536 PE=4 SV=1;69.355	62	7.92e-22;Transcriptome;No hits in Other Sex;Transcriptome_Sp2Male	TRINITY_DN33155_c0_g1_i1:False:527	100.000	64	1.0;NA;NA;6;39;4146.94062;NA;NA
Antimicrobial Peptide Ei1;Antimicrobial peptide;Female	MALDI+Confirmed;Signal Peptide	CS pos: 23-24. Pr: 0.9783	0.9783;Stop codon present;176	Digestion Sp2;27	87.83;27	123.47;36	97.53;40	256.63;>TRINITY_DN379_c0_g1_i1:False:340;>TRINITY_DN988_c0_g2_i1:True:75;TTTTTTTTTTTGCAAGAAAAATATTTAAATTTATTCAAATTTTAAATGTGCATTATTCAATCACTGTTTCAGTTTAAGTCCAGTTTCGATAAAAAACGATCAAACCGATCAAGTTCTAAATCCAAATCCTTCTGGTAGGGTTCAAAGAAATTTTCAATTTCTCGTTTCGACTTTTCAGATGAACTTCCAAACAGCGATGGGACTACCTTCGTTGCTAGCTTCGCCAGAAATCCCCAGAAGGCTTCGGCTTCATCAGTCACTAAGAGATAGGACAAAAATATTACCAACAAAGTCTTGTTGAAGTGCATGGTGAAAGAGGAACAGAT…	81; Probable antimicrobial peptide Con10 OS=Opisthacanthus cayaporum OX=573324 PE=3 SV=1;63.934	61	9.25e-22;tr|A0A224XFL9|A0A224XFL9_9SCOR	77; Putative Non Disulfide Bridge Peptide OS=Megacormus gertschi OX=1843536 PE=4 SV=1;81.013	79	2.56e-38;Orbitrapmatches	Transcriptome;Insolution_Sp9Female	TRINITY_DN988_c0_g2_i1:True:75	100.000	79	1.0;Transcriptome_Sp9Female	TRINITY_DN988_c0_g2_i1:True:75	100.000	79	1.0;NA;NA;0;56;6613.42663;Mass: 2586.3787399999997 (FWGFLAKLATKVVPSLFGSSSEKS)	PTMs:;Mass: 2586.3787399999997 (FWGFLAKLATKVVPSLFGSSSEKS)	PTMs:
Antimicrobial Peptide Ei2a;Antimicrobial peptide;Female	MALDI;Signal Peptide	CS pos: 23-24. Pr: 0.9820	0.9820;Stop codon present;281_2	Digestion Sp2;12	32.74;15	95.39;45	76.64;43	160.17;>TRINITY_DN51_c0_g3_i1:False:388;>TRINITY_DN153_c0_g2_i1:False:394;TTTTTTTTTTTTCAATTTTGCAAAACAATTTATTACAATAATTTCAAGCAAGAAGAATTTACAACTTGTACTAACATGGTGTTTCTTAAACAGAAGTTAACGAAGTAAAACCTTTTTCTGTACAGACTTCTTTACTTCAATAATTCCTGCAAAAATTTAAGATCTGCAGCCGAAAGATCGTCATCGAAGACATCGTCAAACTGATCCCGGTTGATCAAGGGTCTCTGTGGAAAGAGACCCCTCTTTCCAAATAGACCCTTGATTCCATTCCATATGTCACTTAAAATTGCCTCCGATGGGGAAAACAATTGTAAGAGCACTACAG…	69; Antimicrobial peptide UyCT3 OS=Urodacus yaschenkoi OX=1273102 PE=1 SV=1;59.459	74	1.67e-23;tr|A0A1V1WBL7|A0A1V1WBL7_9SCOR	73; Putative NDBP OS=Superstitionia donensis OX=311983 PE=4 SV=1;60.000	75	9.62e-21;Orbitrapmatches	Transcriptome;Insolution_Sp9Female	TRINITY_DN153_c0_g2_i1:False:394	98.649	74	1.0;Transcriptome_Sp9Female	TRINITY_DN153_c0_g2_i1:False:394	98.649	74	1.0;NA;NA;0;51;5890.11507;Mass: 1474.8277999999998 (ILSDIWNGIKGLF)	PTMs: A	Mass: 1474.8277999999998 (ILSDIWNGIKGLF)	PTMs: A;Mass: 1474.8277999999998 (ILSDIWNGIKGLF)	PTMs: A	Mass: 1474.8277999999998 (ILSDIWNGIKGLF)	PTMs: A
Antimicrobial Peptide Ei2a_variant;Other;Male	Absence;Signal Peptide	CS pos: 23-24. Pr: 0.9821	0.9821;Stop codon present;281_1	Digestion Sp2;12	32.74;15	115.65;NA;NA;>TRINITY_DN51_c0_g2_i1:False:383;;TTTTTTTTTTTTTTCAATTCTGCATAAGTTTTATTATAACATTTTCAAGTTTTGTGCATTCAGGTCAAGTGTTAAGAACGTAAATGTAAACCAACACATTAAAAACTTTTCCGTTGTAGACAGACATCTTTATCTGAATAATTCCTGTAAAACTTTAAGATCTGCAGCCGAAAGATCGTCATCAAAGGCATCATCGTCGAAGATATCGTCAAATTGATCTAGGTTTCGGAGACCCCTTTTTCCAAATAAGCTCTTGATTCCATTCCATATATCACTTAAAATTGCCTCCGATGGGGAAAACAATTGTAGGAGAACTACGGCGATTACCAAGATGACGAATTGGTTCTTCATT…	70; Amphipathic peptide CT2 OS=Vaejovis mexicanus smithi OX=1562928 PE=2 SV=1;61.644	73	2.65e-25;tr|A0A1V1WBL7|A0A1V1WBL7_9SCOR	73; Putative NDBP OS=Superstitionia donensis OX=311983 PE=4 SV=1;67.123	73	7.53e-26;;Insolution_Sp9Female	TRINITY_DN153_c0_g1_i5:False:316	82.192	73	1.0;Transcriptome_Sp9Female	TRINITY_DN153_c0_g1_i4:False:265	86.301	73	1.0;NA;NA;0;50;5772.90045;Mass: 1474.8277999999998 (ILSDIWNGIKGLF)	PTMs: A	Mass: 1474.8277999999998 (ILSDIWNGIKGLF)	PTMs: A;NA
Antimicrobial Peptide Ei2b;Antimicrobial peptide;Female	MALDI;Signal Peptide	CS pos: 23-24. Pr: 0.9817	0.9817;Stop codon present;37_1	Reduced Sp2;8	32.74;11	115.65;NA;26	162.90;>TRINITY_DN51_c0_g1_i2:False:718;>TRINITY_DN153_c0_g1_i6:False:1368;TTTTTTTTTGTTTAAATTCCAGTAAATTTTATTACCCTCTTTGATAGTTTACACAATTTTATCGTTTAATAGTTTGGCGATTGTCATGATTAGCAGGCCACAATTTGTGCAATCGTTCCCAAATAATGTTATTCCCTGAGATAAAATGAAGTATTAGAGGAACGTACCTAAGCGTGTTTCAACTGTTTTTATTTTACTGATTTTATGTATCGTCTGTTGAAATAAATTATAAATCTTAAACTTCAATTCTGCAGAATGTTTTATTACAATGTTTTTAAGTATGGGGAATTTAGGTCAAGTCTAAAGAACGTAAACGAAAACCAA…	69; Antimicrobial peptide UyCT3 OS=Urodacus yaschenkoi OX=1273102 PE=1 SV=1;64.706	68	4.21e-27;tr|T1E7M2|T1E7M2_9SCOR	69; CYLIP-Cer-3 OS=Cercophonius squama OX=1330404 PE=2 SV=1;66.176	68	2.26e-26;Orbitrapmatches	Transcriptome;Insolution_Sp9Female	TRINITY_DN153_c0_g1_i6:False:1368	100.000	68	1.0;Transcriptome_Sp9Female	TRINITY_DN153_c0_g1_i6:False:1368	100.000	68	1.0;NA;NA;0;45;5267.73082;Mass: 1504.83837 (ILSDIWNGIKSIF)	PTMs: A	Mass: 1504.83837 (ILSDIWNGIKSIF)	PTMs: A;Mass: 1504.83837 (ILSDIWNGIKSIF)	PTMs: A	Mass: 1504.83837 (ILSDIWNGIKSIF)	PTMs: A
Antimicrobial Peptide Ei2c;Antimicrobial peptide;Female	MALDI;Signal Peptide	CS pos: 23-24. Pr: 0.9800	0.9800;Stop codon present;30_1	Reduced Sp2;NA;13	125.63;17	66.52;30	148.06;>TRINITY_DN51_c0_g2_i2:False:434;>TRINITY_DN153_c0_g1_i9:False:331;TTTTTTTTTTTTTTCAATTCTGCATAAGTTTTATTATAACATTTTCAAGTTTTGTGCATTCAGGTCAAGTGTTAAGAACGTAAATGTAAACCAACACATTAAAAACTTTTCCGTTGTAGACAGACATCTTTATCTGAATAATTCCTGTAAAACTTTAAGATCTGCAGCCGAAAGATCGTCATCAAAGGCATCATCGTCGAAGATATCGTCAAATTGATCTAGGTTTCGGAGACCCCTTTTTCCAAATAAGCTCTTGATTCCATTCCATATATCACCTAAAATTGCCTCCGATGGAAAAACCAATTGCAAGAGAACTACGGCGATC…	69; Antimicrobial peptide UyCT3 OS=Urodacus yaschenkoi OX=1273102 PE=1 SV=1;61.644	73	1.21e-25;tr|A0A1V1WBL7|A0A1V1WBL7_9SCOR	73; Putative NDBP OS=Superstitionia donensis OX=311983 PE=4 SV=1;67.123	73	5.09e-25;Orbitrapmatches	Transcriptome;Insolution_Sp9Female	TRINITY_DN153_c0_g1_i9:False:331	100.000	73	1.0;Transcriptome_Sp9Female	TRINITY_DN153_c0_g1_i9:False:331	100.000	73	1.0;NA;NA;0;50;5742.88988;Mass: 1474.8278 (ILGDIWNGIKSLF)	PTMs: A	Mass: 1474.8278 (ILGDIWNGIKSLF)	PTMs: A;Mass: 1474.8278 (ILGDIWNGIKSLF)	PTMs: A	Mass: 1474.8278 (ILGDIWNGIKSLF)	PTMs: A
Antimicrobial Peptide Ei2d;Antimicrobial peptide;Female	MALDI+Absence;Signal Peptide	CS pos: 23-24. Pr: 0.9817	0.9817;Stop codon present;21_1	Reduced Sp9;NA;NA;NA;44	163.58;;>TRINITY_DN153_c0_g1_i4:False:265;TACTTTTCCGTTATAGACAGCCATCTTTATCTGAATAATTCCTGCAAAGCTTTAAGATCTGCAGCCGAGACATCGCCGTCGAAGAGATCGTCAAATCGATCTAGGTTTCGAAGACCCCTCTTTCCAAATAAACTCTTGATTCCATTCCATATATCACTTAAAATTGCCTCCGATGGGGAAAACAATTGTAGGAGAACTACGGCGATTACCAAGATGACGAATTGGTTCTTCATTTTATTGTTATGCTCAAAGTGAACGAACGTTAGCTAACCTAAGATCCAATGAACG;MKNQFVILVIAVVLLQLFSPSEAILSDIWNGIKSLFGKRGLRNLDRFDDLFDGDVSAADLKALQELFR…	69; Antimicrobial peptide UyCT3 OS=Urodacus yaschenkoi OX=1273102 PE=1 SV=1;67.647	68	2.72e-28;tr|A0A4Q8K3I5|A0A4Q8K3I5_9ARAC	69; U27-Liphistoxin-Lsp1a_1 OS=Liphistius sp. SGP-2016 OX=1905180 PE=4 SV=1;70.588	68	1.53e-25;;Insolution_Sp2Male	TRINITY_DN51_c0_g1_i2:False:718	94.118	68	1.0;Transcriptome_Sp2Male	TRINITY_DN469_c0_g1_i1:False:406	77.941	68	1.0;NA;NA;0;45;5137.70421;NA;Mass: 1504.83837 (ILSDIWNGIKSLF)	PTMs: A	Mass: 1504.83837 (ILSDIWNGIKSLF)	PTMs: A
Antimicrobial Peptide Ei3;Antimicrobial peptide;Female	MALDI;Signal Peptide	CS pos: 22-23. Pr: 0.8783	0.8783;Stop codon present;189	Digestion Sp2;24	78.06;17	28.26;24	103.32;27	182.70;>TRINITY_DN1593_c0_g1_i4:False:307;>TRINITY_DN14_c1_g2_i1:True:157;TTTTTTTTTTTTTTTGTGTGTTATAGCAGTTTATTTAATCTAGTCCAATTCCGAGATTACAGTTGTAACTGTTGTTGCAGCTAGTATTCAGCCAGTTTCGACAATATGTCGTCCAGATCCAACTCTCGTTTTCTAACGTCGATATATCTTTGAGACTCAGCATGTCGTTTCCCAAGTTTCTTGATTGCCGAGATTGCCGATGGTAGAAAACTCAAAAGTAAAGGGAATAATGAGTGGCAATAGTCAACAACTATTAACAGGACAAAGAAAACTGGCATCAAGTTGACCAATTTCATTTTTTTTCTTTTTTAGTTATAGTTTATCC…	74; Putative antimicrobial peptide clone 4 OS=Tityus costatus OX=309814 PE=3 SV=1;39.726	73	4.10e-13;tr|A0A0N9LWM6|A0A0N9LWM6_9SCOR	77; Amp1 OS=Vaejovis punctatus OX=1579313 PE=2 SV=1;61.842	76	1.13e-24;Orbitrapmatches	Transcriptome;Insolution_Sp9Female	TRINITY_DN14_c1_g2_i1:True:157	100.000	71	1.0;Transcriptome_Sp9Female	TRINITY_DN14_c1_g2_i1:True:157	100.000	71	1.0;NA;NA;0;49;5669.17656;Mass: 1702.00107 (LFPLLLSFLPSAISAI)	PTMs:;Mass: 1702.00107 (LFPLLLSFLPSAISAI)	PTMs:
Antimicrobial Peptide Ei4;Antimicrobial peptide;Male	Absence;Signal Peptide	CS pos: 24-25. Pr: 0.9814	0.9814;Stop codon present;250	Digestion Sp2;16	44.62;NA;NA;NA;>TRINITY_DN24409_c0_g1_i1:True:120;;CGATCTTAGGAACTTCTATAATATTGCGTAACTTAGAATTCCAGGTGTTCGCGTACTTCCTGTACGGGGAACGTACGCTGTATAAAGGAAGCAAATCGACTAATTTTCTGGTGTCTGTGAAATCCACCAAGTGTATGTTTCGTTAGTTTTCACCTGCATCCAAAAATGAAGTTCGTAGCCCTTATTTTCGTATCCCTTTTTGCAGTTTGCTTTCTGGAAAATTTAATGGTAGAAGCTGGGTATGGATGCCCCTATCAACCATTTGTATGTAAGACTACCTGTCAGAGTAAAGGATGGAGAAGAGGAATCTGCAAATTGAACAAGTGCATTTGCAAAGACAAAATAAAA…	59.016	61	0.8133333333333334;129.661;NA;12.3485;tr|A0A224X3K1|A0A224X3K1_9SCOR	62; Putative Defensin 1 OS=Megacormus gertschi OX=1843536 PE=4 SV=1;53.061	49	5.57e-11;tr|A0A224X3K1|A0A224X3K1_9SCOR	62; Putative Defensin 1 OS=Megacormus gertschi OX=1843536 PE=4 SV=1;53.061	49	9.94e-08;;No hits in Other Sex;Transcriptome_Sp9Female	TRINITY_DN1488_c0_g1_i3:False:298	63.265	49	0.8032786885245902;NA;NA;6;37;4253.10689;NA;NA
Antimicrobial Peptide Ei5;Antimicrobial peptide;Female	AbsenceNo;Signal Peptide	CS pos: 23-24. Pr: 0.9769	0.9769;Stop codon present;56	Reduced Sp2;NA;12	87.41;71	167.11NA;19	128.4927	135.44;>TRINITY_DN51_c0_g1_i1:False:365;>TRINITY_DN153_c0_g1_i12:False:1272;AAACCAACACATTAAAAACTTTTCCGTTGTAGACAGACATCTTTATCTGAATAATTCCTGCAAAGCTTTAAGATCTGCAGCCGAGAGATCGTCGTCGAAGATATCATCATATTGATCTAGGTTTCTAAGACCCCTCTTTCCAAATAGACCCTTGATTCCATTCCATATAGCCTTAAAAATTGCCTCAGATGGGAAAACCAATTGTAGGAGAACTATGGCGATTATCAAAATGACGAATTGGTTCTTCATTTTGCCGATATGCTGAAAGTGAACGAAAGCTAACCTAAGATCCAATGAATGAATATGTATGTTGGCGGGACACT…	69; Antimicrobial peptide UyCT3 OS=Urodacus yaschenkoi OX=1273102 PE=1 SV=1;64.706	68	8.98e-28;tr|A0A1V1WBL7|A0A1V1WBL7_9SCOR	73; Putative NDBP OS=Superstitionia donensis OX=311983 PE=4 SV=1;69.444	72	1.34e-24;Orbitrapmatches	Transcriptome;Insolution_Sp9Female	TRINITY_DN153_c0_g1_i2:False:818	100.000	68	1.0;Transcriptome_Sp9Female	TRINITY_DN153_c0_g1_i12:False:1272	100.000	68	1.0;NA;NA;0;45;5198.72461;NA;NA
Antimicrobial Peptide Ei6;Antimicrobial peptide;Female	MALDI;Signal Peptide	CS pos: 22-23. Pr: 0.9811	0.9811;Stop codon present;151_1	Digestion Sp9;NA;NA;33	79.54;59	237.90;>TRINITY_DN330_c0_g1_i1:False:366;>TRINITY_DN95_c0_g2_i3:True:270;ATTATTTTATTTTTGATTATTTTCAAATTTCTTAGTAATAACTCCGGTATTTTAACGTTAGCAACGAGTTCGCTTTACGTCATTCGATGGAAACGTGAGGAATCTCGAAGCAAGAAAAAAACCGAAGTATGCACCATAGCACAGCTGTGTTAATCGTCGAACAATATATAAAGTCAAGAGACGCTTTGGGAGATTATCTTCCTTCTCCCTCGCCAGATTTCTCTCCCCTGTCGATATTCATTTGTGAGCTTTTCGGAGCAAGAATCATAGAAAATGAACGCGAAAACTTTTCTCGTTGTCTGCATGATCGCAATGCTGGTGATGGA…	83; Vejovine OS=Vaejovis mexicanus OX=993612 PE=1 SV=1;70.732	82	1.20e-39;tr|A0A224X3W5|A0A224X3W5_9SCOR	83; Putative Non Disulfide Bridge Peptide OS=Megacormus gertschi OX=1843536 PE=3 SV=1;80.488	82	2.49e-42;Transcriptome;No hits in Other Sex;Transcriptome_Sp2Male	TRINITY_DN330_c0_g1_i1:False:366	100.000	82	1.0;GO:0005576: extracellular region (cellular_component);Pfam	Scorpion antimicrobial peptide	9.5E-8;0;60;6629.42561;NA;Mass: 2568.21816 (IGVPPEKAAQMTLDEIVDAMYYN)	PTMs:
Antimicrobial Peptide Ei7;Antimicrobial peptide;Unspecific;Signal Peptide	CS pos: 22-23. Pr: 0.9811	0.9811;Stop codon present;162	Digestion Sp9;NA;NA;60	75.44;56	188.63;>TRINITY_DN330_c0_g2_i2:False:438;>TRINITY_DN95_c0_g1_i2:True:105;CATATAAAGCCAAGACTTGCGCTGAGAGAATATCTTCCTTCTTCTCCGCCAGATTTTTCTCCTGCCCAATATTCAGTCCTGTGCTTTTCGGAGCAAGAATCATAAAAAATGAACGCTAAGACTTTCCTGGTTGTCTGCATGGTCGCAATGCTGGTGCTGGATCAAGCAGAGGCAGGATTCTTCAGCAAACTTGTAGGCTGGGGAAAGAAAGCATGGAAGTCTAAATTAGGAAAGTCACTGCGAAAGCAGGCAGCTGGTGCAATTAGCAATCTTGTTGCACCTGAAGCGGCACCAGAAGCGACACTGGACGAACTTGTGGATGCCCT…	83; Vejovine OS=Vaejovis mexicanus OX=993612 PE=1 SV=1;50.000	80	5.27e-21;tr|A0A224X3W5|A0A224X3W5_9SCOR	83; Putative Non Disulfide Bridge Peptide OS=Megacormus gertschi OX=1843536 PE=3 SV=1;58.537	82	6.14e-27;Transcriptome;No hits in Other Sex;Transcriptome_Sp2Male	TRINITY_DN330_c0_g2_i2:False:438	100.000	76	1.0;NA;NA;0;54;5773.14122;NA;NA
Antimicrobial Peptide Ei8;Antimicrobial peptide;Female	MALDI+Absence;Signal Peptide	CS pos: 23-24. Pr: 0.9807	0.9807;Stop codon present;179	Digestion Sp9;NA;NA;18	66.52;44	156.65;;>TRINITY_DN153_c0_g1_i5:False:316;TACTTTTCCGTTATAGACAGCCATCTTTATCTGAATAATTCCTGCAAAGCTTTAAGATCTGCAGCCGAGACATCGCCGTCGAAGAGATCGTCAAATCGATCTAGGTTTCGAAGACCCCTCTTTCCAAATAAACTCTTGATTCCATTCCATATATCACCTAAAATTGCCTCCGATGGAAAAACCAATTGCAAGAGAACTACGGCGATCACCAAGATGACGAATTGGTTCTTCATTTTATAGATATGCTGAAAGTGAATGAATGCTATCCTACGATCCAATGAACGAATATGAATGTTGGCGGACACCGTGGTGTTTTCTTATATACTATTACTGAAAACGTGCCTTTTCGTGAATACT…	69; Antimicrobial peptide UyCT3 OS=Urodacus yaschenkoi OX=1273102 PE=1 SV=1;67.647	68	1.83e-29;sp|L0GCI6|NDB4H_UROYA	69; Antimicrobial peptide UyCT3 OS=Urodacus yaschenkoi OX=1273102 PE=1 SV=1;67.647	68	3.28e-26;;Insolution_Sp2Male	TRINITY_DN51_c0_g2_i1:False:383	79.452	73	1.0735294117647058;Transcriptome_Sp2Male	TRINITY_DN469_c0_g1_i1:False:406	79.412	68	1.0;NA;NA;0;45;5107.69364;NA;Mass: 1474.8278 (ILGDIWNGIKSLF)	PTMs: A	Mass: 1474.8278 (ILGDIWNGIKSLF)	PTMs: A
Antimicrobial Peptide Ei8_variant;Antimicrobial peptide;Female	MALDI+Absence;Signal Peptide	CS pos: 23-24. Pr: 0.9801	0.9801;Stop codon present;179_1	Digestion Sp9;NA;NA;17	66.52;30	148.06;;>TRINITY_DN153_c0_g1_i7:False:783;TTTTTTTTTTTGATCTGCAGAGGTATGTTTATTTTGAAAGAGAGTTTGATAATTATCAAGAAATTTACTATTTTATTCATTGCGGTTTAAAATTCGTTCATGAATCAATTGAGTAATAATTAGTAAGTTCCAGCAGATAGTAGTACGACTTTATTACCCCTTTAATAGTTTACACAATTTAATAGTTTGGCGATTGTAATGATTAGCAGGCCACAGTTTGTGCAGTCGTTACCCAAATAATGTTCTTCCCTGTGAGGAAGAAGTATTAGAGAAAAGTACTTTAGCCTTTTTCAACTGTTTTTATTTTGCTGATTTTAAGTAGCGTCTGTTAAAACAAATTATGCATAAATAAATCTT…	69; Antimicrobial peptide UyCT3 OS=Urodacus yaschenkoi OX=1273102 PE=1 SV=1;61.644	73	6.25e-26;tr|A0A1V1WBL7|A0A1V1WBL7_9SCOR	73; Putative NDBP OS=Superstitionia donensis OX=311983 PE=4 SV=1;67.123	73	2.91e-25;;Insolution_Sp2Male	TRINITY_DN51_c0_g2_i1:False:383	93.151	73	1.0;Transcriptome_Sp2Male	TRINITY_DN51_c0_g2_i2:False:434	97.260	73	1.0;NA;NA;0;50;5730.88989;NA;Mass: 1474.8278 (ILGDIWNGIKSLF)	PTMs: A	Mass: 1474.8278 (ILGDIWNGIKSLF)	PTMs: A
Antimicrobial Peptide Ei8_variant;Antimicrobial peptide;Female	MALDI;Signal Peptide	CS pos: 23-24. Pr: 0.9800	0.9800;Stop codon present;179_2	Digestion Sp9;NA;NA;17	66.52;30	148.06;>TRINITY_DN51_c0_g2_i2:False:434;>TRINITY_DN153_c0_g1_i9:False:331;AACTTCTCCGTTATAGACAGACATCTTTATCTGAATAATTCCTGTAAAACTTTAAGATCTGCAGCCGAAAGATCGTCATCAAAGGCATCATCGTCGAAGATATCGTCAAATTGATCTAGGTTTCGGAGACCCCTTTTTCCAAATAAGCTCTTGATTCCATTCCATATATCACCTAAAATTGCCTCCGATGGAAAAACCAATTGCAAGAGAACTACGGCGATCACCAAGATGACGAATTGGTTCTTCATTTTATAGATATGCTGAAAGTGAATGAATGCTATCCTACGATCCAATGAACGAATATGAATGTTGGCGGACACCGTGG…	69; Antimicrobial peptide UyCT3 OS=Urodacus yaschenkoi OX=1273102 PE=1 SV=1;61.644	73	1.21e-25;tr|A0A1V1WBL7|A0A1V1WBL7_9SCOR	73; Putative NDBP OS=Superstitionia donensis OX=311983 PE=4 SV=1;67.123	73	5.09e-25;Transcriptome;Insolution_Sp2Male	TRINITY_DN51_c0_g2_i1:False:383	95.890	73	1.0;Transcriptome_Sp2Male	TRINITY_DN51_c0_g2_i2:False:434	100.000	73	1.0;NA;NA;0;50;5742.88988;NA;Mass: 1474.8278 (ILGDIWNGIKSLF)	PTMs: A	Mass: 1474.8278 (ILGDIWNGIKSLF)	PTMs: A
Antimicrobial Peptide Ei9;Antimicrobial peptide;Unspecific;Signal Peptide	CS pos: 23-24. Pr: 0.9800	0.9800;Stop codon present;254_4	Digestion Sp9;NA;NA;11	41.52;26	94.16;>TRINITY_DN469_c0_g1_i1:False:406;>TRINITY_DN3033_c0_g2_i1:False:399;TTTTTTTTTTTTTTCAATTTTGCAAAATATTTTATTACATATTTTCAAGAATGGTGAATTTACAAGATGTACAAGTGCTCCTTAAACTAAAGTTAACGAAGTAAGAACATTTTAAGTACAGACATCTTTACTTCAATAATTCTTGCAAAATTTTAAGATCTGCAGCCGAAAGATCGTCATTGAAGACATCGTCAAACTGATCTAGGTTGCGAAGACCCCTCTTTCCAAATAGACTCTTGATTCCATTCCATATAGCACCTAAAATTGCCTCTGATTGCGAAACCAGTTGTAAGAGAAATACAGCGATTAGCAAAATAACGAACT…	69; Antimicrobial peptide UyCT3 OS=Urodacus yaschenkoi OX=1273102 PE=1 SV=1;64.706	68	1.99e-27;tr|A0A1V1WBL7|A0A1V1WBL7_9SCOR	73; Putative NDBP OS=Superstitionia donensis OX=311983 PE=4 SV=1;63.889	72	2.01e-24;Transcriptome;Insolution_Sp2Male	TRINITY_DN51_c0_g3_i1:False:388	77.027	74	1.088235294117647;Transcriptome_Sp2Male	TRINITY_DN469_c0_g1_i1:False:406	98.529	68	1.0;NA;NA;0;45;5072.7392;NA;NA
Antimicrobial Peptide Ei9_variant;Antimicrobial peptide;Female	Absence;Signal Peptide	CS pos: 23-24. Pr: 0.9803	0.9803;Stop codon present;254_5	Digestion Sp9;NA;NA;11	41.52;26	94.16;;>TRINITY_DN3033_c0_g2_i2:False:399;TTTTTTTTTTTTTTCAATTTTGCAAAATATTTTATTACATATTTTCAAGAATGGTGAATTTACAAGATGTACAAGTGCTCCTTAAACTAAAGTTAACGAAGTAAGAACATTTTAAGTACAGACATCTTTACTTCAATAATTCTTGCAAAATTTTAAGATCTGCAGCCGAAAGATCGTCATTGAAGACATCGTCAAACTGATCTAGGTTGCGAAGACCCCTCTTTCCAAATAGACTCTTGATTCCATTCCATATAGCACCTAAAATTGCCTCTGATTGGGAAACCAGTTGTAAGAGAACTACAGCGATTAGCAAAATAACGAACTGATTCTTCATTTTATCGATTTGCTGATGATATC…	69; Antimicrobial peptide UyCT3 OS=Urodacus yaschenkoi OX=1273102 PE=1 SV=1;66.176	68	1.69e-28;tr|A0A1V1WBL7|A0A1V1WBL7_9SCOR	73; Putative NDBP OS=Superstitionia donensis OX=311983 PE=4 SV=1;65.278	72	2.03e-25;;Insolution_Sp2Male	TRINITY_DN51_c0_g3_i1:False:388	78.378	74	1.088235294117647;Transcriptome_Sp2Male	TRINITY_DN469_c0_g1_i1:False:406	97.059	68	1.0;NA;NA;0;45;5072.7392;NA;NA
Antimicrobial Peptide Ei10;Antimicrobial peptide;Female	Absence;Signal Peptide	CS pos: 23-24. Pr: 0.9798	0.9798;Stop codon present;44	Reduced Sp9;NA;NA;7	28.34;25	111.83;;>TRINITY_DN153_c0_g1_i10:False:528;GAATATTTTCAAGTATGGTAAATTTAGGTCAAGTTGCAGGAATGTAATTTTTCTTGCACAAAAACCAATACAGTAAGAACTTCTCAGTTATAGACAGGCATCTTTATCTAAATAATTCCTGCAAAGCTTTAAGATCTGCAGCCGAGACATCGCCGTCGAAGAGATCGTCAAATCGATCTAGGTTTCGAAGACCCCTCTTTCCAAATAGACTTTTGAGTCCACTCCAGAGTGCACCTAAAATTGCCTCCGATTGGGAAACCAATTGTAAGAGAACTACGGCGATTACCAAGATGACGAATTGGTTCTTCATTTTACCGATTTGTTGAAAGTGAACGAAAGCTAACCTACGATCCAAT…	69; Antimicrobial peptide UyCT3 OS=Urodacus yaschenkoi OX=1273102 PE=1 SV=1;67.647	68	1.45e-29;tr|A0A4Q8K3I5|A0A4Q8K3I5_9ARAC	69; U27-Liphistoxin-Lsp1a_1 OS=Liphistius sp. SGP-2016 OX=1905180 PE=4 SV=1;70.588	68	1.02e-26;;Insolution_Sp2Male	TRINITY_DN51_c0_g1_i3:False:416	79.452	73	1.0735294117647058;Transcriptome_Sp2Male	TRINITY_DN469_c0_g1_i1:False:406	79.412	68	1.0;NA;NA;0;45;5036.69291;NA;NA
Antimicrobial Peptide Ei11;Antimicrobial peptide;Unspecific;Signal Peptide	CS pos: 22-23. Pr: 0.9788	0.9788;Stop codon present;58	Reduced Sp9;NA;NA;NA;25	87.99;>TRINITY_DN1593_c0_g1_i3:False:277;>TRINITY_DN14_c1_g1_i1:True:307;GGTGGGGAATAGGAGTGAATGTGTTAGTGAGTAAACAAGGATCTATCGTTTTTAGCAATATTATTTCGGCTGAACGTGATTTTCGTACCTTACGTGAAAAACCAGAAACCATATGTTGTTTGTTTGTCACTGCATAAAAAGGCATAACTTCCATATTTGACGTATCGAAAACACTCGGTCATTATTGCTAGTCTAGTGATGACGAAACATAATGGAATACAGTTTATAAATATGTTTCTGCGTTACTAAAGAACAATAGACGATATTCTTCTCTTCGCTTCTCAGAAAAAACTAACCACCAAACTAAGAGAAAATGAAATTGACCA…	75; Antimicrobial peptide AcrAP2 OS=Androctonus crassicauda OX=122909 PE=1 SV=1;49.351	77	3.45e-14;tr|A0A1V1WBM3|A0A1V1WBM3_9SCOR	72; Putative NDBP OS=Superstitionia donensis OX=311983 PE=4 SV=1;67.606	71	1.59e-26;Transcriptome;No hits in Other Sex;Transcriptome_Sp2Male	TRINITY_DN1593_c0_g1_i3:False:277	100.000	71	1.0;NA;NA;0;49;5606.12929;NA;NA
Putative Serine Protease Inhibitor Et1a;Other;Male	MALDI+Confirmed;Signal Peptide	CS pos: 29-30. Pr: 0.9797	0.9797;Stop codon present;111_2	Digestion Sp2;52	128.2;NA;NA;NA;>TRINITY_DN58_c0_g1_i7:True:28;>TRINITY_DN53_c0_g1_i2:True:45;CGGGATCAGAGCATGACGTCAACAGTAAAGAGCTTATATAACGATGACGAATTTGAGAGAGACGGTTGCCAACATGAAGACTCTAGCAGTAACACTTCTAACTCTCGCTGCGTTTCAGCTTGTCCTACCGTATCCTCAACCCGAAGAGTCAAGTCCCCCGGAAAACTGTGGTGAAAACGAATTGTTTTATGGGAGAAGAACTTGTGCTCCCATCTGCAACGATGAAGTTTGTAAGAAACCCAGTAGAGAACCAACAGCTTGCTTCGCGATATGTTATCAGGGATGTTACTGCAAAGAGGGCTATGGAAGGAACCGCAGAAAT…	99.048	105	1.0;1712.29;218.501;88.1089;sp|A0A2R4SV19|ALL6_APICE	88; Venom serine protease inhibitor OS=Apis cerana OX=7461 PE=2 SV=1;31.395	86	0.002;NA;NA;NA;Transcriptome;Insolution_Sp9Female	TRINITY_DN53_c0_g1_i3:True:186	87.778	90	0.9;Transcriptome_Sp9Female	TRINITY_DN53_c0_g1_i2:True:45	99.000	100	1.0;NA;Gene3D	Laminin	1.4E-6| Pfam	Trypsin Inhibitor like cysteine rich domain	PF01826	1.8E-5| SUPERFAMILY	Serine protease inhibitors	SSF57567	4.71E-6;10;71;8118.5326;Mass: 6563.74734 (YPQPEESSPPENCGENELFYGRRTCAPICNDEVCKKPSREPTACFAICYQGCYCKEGY)	PTMs: A	C-C;NA
Putative Serine Protease Inhibitor Et1a_variant;Other;Male	MALDI+Absence;Signal Peptide	CS pos: 19-20. Pr: 0.9826	0.9826;Stop codon present;111	Digestion Sp2;58	128.2;NA;NA;NA;>TRINITY_DN58_c0_g1_i3:True:806;;AGTTATATAAAATTTATTTGAAAGAGCTGATATAGAAATAAATAAAATTAAATTTGTTTGAGTTATAATAATAAGAAATTGCAATATAAAATTATCCTTATTAGAGTTTTGGCTGGAATATTCAGTTCTTATTTATGCTCTAAAAACCAGTGTAGAATACAAAACAGAACACCAACTAACTTACATCTGGATAAAGACTTAAAGTATTATACAATTAAGATAGTTGACAGAAGGCTTTTCTTCAACATAAGTTTCTTTATTTTCTTCTTTTAACTTTATCAAAAACAGCTCCAATACTTGAGAAGACGTTTCGCCCAGTTTTAACTCCCAACAGTCAATACCTTTGAGCAT…	96.842	95	0.9047619047619048;4.62063;NA;88.1089;sp|A0A2R4SV19|ALL6_APICE	88; Venom serine protease inhibitor OS=Apis cerana OX=7461 PE=2 SV=1;31.646	79	0.002;tr|A0A6P7UI81|A0A6P7UI81_IXOSC	92; chymotrypsin-elastase inhibitor ixodidin-like OS=Ixodes scapularis OX=6945 GN=LOC115310925 PE=3 SV=1;37.363	91	1.89e-06;;Insolution_Sp9Female	TRINITY_DN53_c0_g1_i3:True:186	88.889	90	1.0;Transcriptome_Sp9Female	TRINITY_DN53_c0_g1_i2:True:45	97.778	90	1.0;NA;Gene3D	Laminin	1.4E-6| Pfam	Trypsin Inhibitor like cysteine rich domain	PF01826	1.8E-5| SUPERFAMILY	Serine protease inhibitors	SSF57567	4.71E-6;10;71;8118.5326;Mass: 6563.74734 (YPQPEESSPPENCGENELFYGRRTCAPICNDEVCKKPSREPTACFAICYQGCYCKEGY)	PTMs: A	C-C;NA
Putative Serine Protease Inhibitor Ei1b;Other;Male	MALDI+Confirmed;Signal Peptide	CS pos: 19-20. Pr: 0.9830	0.9830;Stop codon present;165	Digestion Sp2;35	93.39;NA;58	68.54;NA;>TRINITY_DN58_c0_g1_i10:True:630;>TRINITY_DN53_c0_g1_i1:True:186;CTTGTATCTAGCTAGAAGAAGTATGTTCCCATCCTTACTAAAAAACGATCCTTAAAGTTTGAAGTCAGTATCTTCAAATTTGATAATTAGAGTCAGAGAGGTAGAATTCAAATAGTGTCATCATCAAAGAAAGGAAGTCTCAGTACATCACATATGATCCGGATCGAAATATTCTTAGAGAAGAATAAACTTCAAGTCCATCCCGCAACCATTTGAACAGGGAACTCTGTTAACGGTATGGAACTGTTATAAAAACATACCAGTAGGCTCCCATGTGTTGGGTTTGGTTATGAATCTACTCGCGATCCGCATTGATAGGGGCGGC…	97.826	92	1.0;86.8033;64.697;27.0235;sp|A0A2R4SV19|ALL6_APICE	88; Venom serine protease inhibitor OS=Apis cerana OX=7461 PE=2 SV=1;30.000	80	0.048;tr|A0A131XJB5|A0A131XJB5_9ACAR	86; Putative serine proteinase inhibitor OS=Hyalomma excavatum OX=257692 PE=2 SV=1;38.158	76	5.16e-06;Orbitrapmatches	Transcriptome;Insolution_Sp9Female	TRINITY_DN53_c0_g1_i3:True:186	98.889	90	1.0;Transcriptome_Sp9Female	TRINITY_DN53_c0_g1_i3:True:186	98.889	90	1.0;NA;Gene3D	Laminin	2.7E-6| SUPERFAMILY	Serine protease inhibitors	SSF57567	5.23E-6| Pfam	Trypsin Inhibitor like cysteine rich domain	PF01826	2.0E-5;10;71;7894.45155;Mass: 6667.81179 (YPQPEESSPPENCGENELSYGSRTCAPICNDEVCKKPSEGLIPCLAICYQGCFCKEGYGRN)	PTMs: C-C	Mass: 6667.81179 (YPQPEESSPPENCGENELSYGSRTCAPICNDEVCKKPSEGLIPCLAICYQGCFCKEGYGRN)	PTMs: C-C;Mass: 6667.81179 (YPQPEESSPPENCGENELSYGSRTCAPICNDEVCKKPSEGLIPCLAICYQGCFCKEGYGRN)	PTMs: C-C	Mass: 6667.81179 (YPQPEESSPPENCGENELSYGSRTCAPICNDEVCKKPSEGLIPCLAICYQGCFCKEGYGRN)	PTMs: C-C
Protease inhibitor;Other;Unspecific;Signal Peptide	CS pos: 13-14. Pr: 0.9697	0.9697;Stop codon present;144_2	Digestion Sp2;13	105.45;9	46.10;NA;NA;>TRINITY_DN1148_c1_g1_i6:False:1519;>TRINITY_DN309_c0_g1_i3:True:360;TTTTTTTTTTTGAAAAGCAATACTTTTATTATTTGCCTTAAAATTTACAAAATTTTATTCAGTCGCTTATAACGAAGAATATATGTATATTTCTTATAATGGAGACAAAAATGTTTGCAAAAGTTTCGTAAATTAATAAGGACGGATCTATTTATGGCACTCAAACAATTTTCTTAAATGTAACCCACGTTTGTAACTTTCACAAAAAGGACACCTGCAAGAATTCAATCTCATCATCAGCCGCCATTCTTCCACCAAGGTTTCTTCTGAAGTACTCTTTGTCGCCAAATGCGTAAAAGGGCTTCTCTTAGCTTTTCT…	99.500	400	1.0;32.2949;4.56434;34.1881;NA;NA;NA;tr|A0A224X3W8|A0A224X3W8_9SCOR	406; Putative Protease inhibitor (Fragment) OS=Megacormus gertschi OX=1843536 PE=3 SV=1;82.707	399	0.0;Transcriptome;No hits in Other Sex;Transcriptome_Sp9Female	TRINITY_DN309_c0_g1_i3:True:360	99.492	394	1.0;GO:0005615: extracellular space (cellular_component);SUPERFAMILY	Serpins	3.14E-126| PANTHER	SERINE PROTEASE INHIBITOR	SERPIN	PTHR11461	1.6E-96| Gene3D	Antithrombin	G3DSA:3.30.497.10	3.4E-126| SMART	serpin2	SM00093	6.6E-128| Pfam	Serpin (serine protease inhibitor)	PF00079	2.7E-120| Gene3D	-	G3DSA:2.30.39.10	3.4E-126| ProSitePatterns	Serpins signature.	PS00284	-| CDD	serpinJ_IRS-2-like	cd19577	1.30863E-177| PANTHER	SERPIN B4	PTHR11461:SF186	1.6E-96;0;381;43016.12972;NA;NA
Protease inhibitor;Other;Male	Absence;Signal Peptide	CS pos: 14-15. Pr: 0.9817	0.9817;Stop codon present;144_5	Digestion Sp2;12	105.45;9	46.10;NA;NA;>TRINITY_DN1148_c1_g1_i1:False:1582;;TTTTTTTTTTTGAAAAGCAATACTTTTATTATTTGCCTTAAAATTTACAAAATTTTATTCAGTCGCTTATAACGAAGAATATATGTATATTTCTTATAATGGAGACAAAAATGTTTGCAAAAGTTTCGTAAATTAATAAGGACGGATCTATTTATGGCACTCAAACAATTTTCTTAAATGTAACCCACGTTTGTAACTTTCACAAAAAGGACACCTGCAAGAATTCAATCTCATCATCAGCCGCCATTCTTCCACCAAGGTTTCTTCTGAAGTACTCTTTGTCGCCAAATGCGTAAAAGGGCTTCTCTTAGCTTTTCTTAGAGTTCATTAACTCGTCCCATGAAAAGTAT…	95.012	421	1.0;5.31275;NA;500.355;NA;NA;NA;tr|A0A224X3U8|A0A224X3U8_9SCOR	415; Putative Protease inhibitor OS=Megacormus gertschi OX=1843536 PE=3 SV=1;79.227	414	0.0;;No hits in Other Sex;Transcriptome_Sp9Female	TRINITY_DN309_c0_g1_i3:True:360	94.177	395	1.0;NA;NA;1;381;43160.22583;NA;NA
Protease inhibitor;Other;Male	Expressionlevel;Signal Peptide	CS pos: 13-14. Pr: 0.9697	0.9697;Stop codon present;144_6	Digestion Sp2;12	105.45;9	46.10;NA;NA;>TRINITY_DN1148_c1_g1_i2:False:1582;>TRINITY_DN309_c0_g1_i3:True:360;TTTTTTTTTTTGAAAAGCAATACTTTTATTATTTGCCTTAAAATTTACAAAATTTTATTCAGTCGCTTATAACGAAGAATATATGTATATTTCTTATAATGGAGACAAAAATGTTTGCAAAAGTTTCGTAAATTAATAAGGACGGATCTATTTATGGCACTCAAACAATTTTCTTAAATGTAACCCACGTTTGTAACTTTCACAAAAAGGACACCTGCAAGAATTCAATCTCATCATCAGCCGCCATTCTTCCACCAAGGTTTCTTCTGAAGTACTCTTTGTCGCCAAATGCGTAAAAGGGCTTCTCTTAGCTTTTCT…	99.525	421	1.0;287.287;4.56434;500.355;NA;NA;NA;tr|A0A224X3U8|A0A224X3U8_9SCOR	415; Putative Protease inhibitor OS=Megacormus gertschi OX=1843536 PE=3 SV=1;81.884	414	0.0;Transcriptome;No hits in Other Sex;Transcriptome_Sp9Female	TRINITY_DN309_c0_g1_i3:True:360	99.492	394	1.0;NA;NA;0;381;43016.12972;NA;NA
Putative Ribonuclease Inhibitor;Other;Male	Absence;Signal Peptide	CS pos: 19-20. Pr: 0.9822	0.9822;Stop codon present;19	Digestion Sp2;66	252.69;4	43.84;NA;NA;>TRINITY_DN35149_c0_g1_i1:False:1835;;TTTTTTTTTTTTTTAATGGTTTTTCATTTATTTCCAAAATTGAAGAACTGGTCACACCAAGGATACAGATACTGTATTTCTGTTGACTTAATTTCTAGGCAATAAAAATGTCTATCTAACAATATATTCCGTTTCAAAACGTGGCTTCCCAACCAAATTTAAAAAATAGCCCGTATTAAAAATTGCATTGATAAGAATTTATAAATAACTATCACGACTTTTTCAAATCACAGCGATGACATTTGACCTTGCCTAATATCAGCATCCCACTAACTCAACATTATGTTCTTTCAATCGAGTCACAATTGATGTAATGTTGTCACTATAACACACCATCATATTTCCTTCT…	100.000	512	1.0;348.92;NA;7.10208;tr|A0A6P6YLC2|A0A6P6YLC2_DERPT	3196; Non-specific serine/threonine protein kinase OS=Dermatophagoides pteronyssinus OX=6956 GN=LOC113799867 PE=4 SV=1;28.182	220	1.97e-05;tr|V5HSZ7|V5HSZ7_IXORI	462; Putative membrane glycoprotein lig-1 OS=Ixodes ricinus OX=34613 PE=2 SV=1;32.110	436	3.14e-42;;Insolution_Sp9Female	TRINITY_DN60396_c0_g1_i1:True:0	100.000	115	0.22682445759368836;Transcriptome_Sp9Female	TRINITY_DN44851_c0_g1_i1:True:2	100.000	396	0.7810650887573964;GO:0005515: protein binding (molecular_function);Gene3D	Ribonuclease Inhibitor	1.1E-11| PANTHER	AGAP008170-PA	PTHR45712:SF22	1.4E-61| SMART	LRR_sd22_2	SM00365	400.0| SMART	LRR_sd22_2	SM00365	120.0| SMART	LRR_sd22_2	SM00365	270.0| SMART	LRR_sd22_2	SM00365	25.0| SMART	LRR_sd22_2	SM00365	230.0| SMART	LRR_sd22_2	SM00365	470.0| SMART	LRR_sd22_2	SM00365	700.0| SMART
Putative Metalloprotease;Enzyme;Male	Absence;Signal Peptide	CS pos: 17-18. Pr: 0.9884	0.9884;Stop codon present;67	Digestion Sp2;38	172.47;NA;NA;NA;>TRINITY_DN128_c0_g1_i3:False:2772;;CGCGTTTCAATAAAAAAAAGTAAATAATTTTTTTAGCAAAATAAAAACAAATATCGTACATTTAATCCGTAATGTTTCTCACTATTACCATTTTTAGATCCAATTTATGCACTTTTGATGTTATTCAAACAAACAGTCCTGGATTAAAAATTCAATTTATTGCACACTAGCAATATCGTCTTTATCCTTTGTTATTTAAATTCGCAGTAAATTGGCAACGAGGCTACTAGTTTAAGTGATAGTTTAAGGTGATTGTTACATTATTCTTAGGTTCAACAATTCCACGAAACAATGTGTTTCTCCACTACTTCATATGTAGTTGCTTCCACACATTCTCTTTGTGTATT…	95.681	602	0.8775510204081632;63.4345;NA;92.312;NA;NA;NA;tr|A0A1S5QMZ5|A0A1S5QMZ5_TITSE	621; Angiotensin-converting enzyme OS=Tityus serrulatus OX=6887 PE=2 SV=1;74.880	625	0.0;;Insolution_Sp9Female	TRINITY_DN1233_c0_g1_i1:True:151	48.748	599	0.9614767255216693;Transcriptome_Sp9Female	TRINITY_DN1165_c0_g1_i1:True:241	95.681	602	0.9662921348314607;GO:0006508: proteolysis (biological_process)| GO:0008237: metallopeptidase activity (molecular_function)| GO:0008241: peptidyl-dipeptidase activity (molecular_function)| GO:0016020: membrane (cellular_component);"""""""SUPERFAMILY	Metalloproteases (""""""""zincins"""""""")	catalytic domain	5.78E-226| Pfam	Angiotensin-converting enzyme	PF01401	1.9E-257| PANTHER	ANGIOTENSIN-CONVERTING ENZYME-LIKE PROTEIN ACE3	PTHR10514:SF41	3.7E-296| PRINTS	Peptidyl-dipeptidase A (M2) metalloprotease family signature	PR00791	5.0E-97| PRINTS	Peptidyl-dipeptidase A (M2) metalloprotease family signature	PR00791	5.0E-97| PRINTS	Peptidyl-dipeptidase A (M2) metalloprotease family signature	PR00791	5.0E-97| PRINTS	Peptidyl-dipeptidase A (M2) metalloprotease family signature	PR00791	5.0E-97| PRINTS	Peptidyl-dipeptidase A (M2) metalloprotease family signature	PR00791	5.0E-97| PRINTS	Peptidyl-dipeptidase A (M2) metalloprotease family signature	PR00791	5.0E-97| PRINTS	Peptidyl-dipeptidase A (M2) metalloprotease family signature	PR00791	5.0E-97| PRINTS
Putative Metalloprotease;Enzyme;Male	Absence;Signal Peptide	CS pos: 21-22. Pr: 0.3367	0.3367;Stop codon present;67_3	Digestion Sp2;43	172.47;NA;NA;NA;>TRINITY_DN128_c0_g1_i6:False:2565;;CGCGTTTCAATAAAAAAAAGTAAATAATTTTTTTAGCAAAATAAAAACAAATATCGTACATTTAATCCGTAATGTTTCTCACTATTACCATTTTTAGATCCAATTTATGCACTTTTGATGTTATTCAAACAAACAGTCCTGGATTAAAAATTCAATTTATTGCACACTAGCAATATCGTCTTTATCCTTTGTTATTTAAATTCGCAGTAAATTGGCAACGAGGCTACTAGTTTAAGTGATAGTTTAAGGTGATTGTTACATTATTCTTAGGTTCAACAATTCCACGAAACAATGTGTTTCTCCACTACTTCATATGTAGTTGCTTCCACACATTCTCTTTGTGTATT…	100.000	550	0.8017492711370262;10.0899;NA;92.312;NA;NA;NA;tr|A0A1S5QMZ5|A0A1S5QMZ5_TITSE	621; Angiotensin-converting enzyme OS=Tityus serrulatus OX=6887 PE=2 SV=1;79.091	550	0.0;;Insolution_Sp9Female	TRINITY_DN1233_c0_g1_i1:True:151	51.087	552	0.9804618117229129;Transcriptome_Sp9Female	TRINITY_DN1165_c0_g1_i1:True:241	100.000	550	0.9769094138543517;GO:0006508: proteolysis (biological_process)| GO:0008237: metallopeptidase activity (molecular_function)| GO:0008241: peptidyl-dipeptidase activity (molecular_function)| GO:0016020: membrane (cellular_component);"""""""Pfam	Angiotensin-converting enzyme	5.5E-246| PANTHER	ANGIOTENSIN-CONVERTING ENZYME-LIKE PROTEIN ACE3	PTHR10514:SF41	2.4E-285| SUPERFAMILY	Metalloproteases (""""""""zincins"""""""")	catalytic domain	SSF55486	4.72E-217| CDD	M2_ACE	cd06461	0.0| PRINTS	Peptidyl-dipeptidase A (M2) metalloprotease family signature	PR00791	2.8E-97| PRINTS	Peptidyl-dipeptidase A (M2) metalloprotease family signature	PR00791	2.8E-97| PRINTS	Peptidyl-dipeptidase A (M2) metalloprotease family signature	PR00791	2.8E-97| PRINTS	Peptidyl-dipeptidase A (M2) metalloprotease family signature	PR00791	2.8E-97| PRINTS	Peptidyl-dipeptidase A (M2) metalloprotease family signature	PR00791	2.8E-97| PRINTS	Peptidyl-dipeptidase A (M2) metalloprotease family signature	PR00791	2.8E-97| PRINTS
Putative Metalloprotease;Enzyme;Unspecific;Signal Peptide	CS pos: 23-24. Pr: 0.9821	0.9821;Stop codon present;4	Digestion Sp2;90	321.34;5	31.99;NA;NA;>TRINITY_DN354_c0_g1_i3:True:2;>TRINITY_DN293_c0_g1_i1:True:1;CATTCACCATGCGGAGTCCGGGTGTTTTGTTAACGGCAGTTGTGTGTCTTTATTTTGGACTACAGCCAGCGTCGTCGCTGATTTCTGACGAAGGAAGAGCGGAAGAATTCCTGGACGATGTAGATCGACAGCATCGAGAATGGTGTCTGGACAACACCAAACAACTGAACTATACACGGATTAGGTCGTTTGACTGGCATCACTTTTCAAATCCGGAGCTTCGGAGAGCTTTTCAATTGCTGTCAGAAACAGAATCTGCTTCGACTTATGTGCCCGACAGAGAAGACAAAGCTAAATACGAAGAATTGGAAGAAACCATGATTGT…	39.292	537	0.8261538461538461;2485.03;4466.63;20.7057;NA;NA;NA;tr|A0A1W7R9Z8|A0A1W7R9Z8_9SCOR	591; Angiotensin-converting enzyme OS=Hadrurus spadix OX=141984 PE=3 SV=1;73.905	571	0.0;Transcriptome;Insolution_Sp9Female	TRINITY_DN1233_c0_g1_i1:True:151	39.292	537	0.9163822525597269;Transcriptome_Sp9Female	TRINITY_DN293_c0_g1_i1:True:1	100.000	585	0.9982935153583617;GO:0006508: proteolysis (biological_process)| GO:0008237: metallopeptidase activity (molecular_function)| GO:0008241: peptidyl-dipeptidase activity (molecular_function)| GO:0016020: membrane (cellular_component);"""""""SUPERFAMILY	Metalloproteases (""""""""zincins"""""""")	catalytic domain	6.59E-115| CDD	M2_ACE	cd06461	5.94354E-169| PANTHER	ANGIOTENSIN-CONVERTING ENZYME	PTHR10514	1.3E-137| Pfam	Angiotensin-converting enzyme	PF01401	3.2E-131| PRINTS	Peptidyl-dipeptidase A (M2) metalloprotease family signature	PR00791	1.9E-31| PRINTS	Peptidyl-dipeptidase A (M2) metalloprotease family signature	PR00791	1.9E-31| PRINTS	Peptidyl-dipeptidase A (M2) metalloprotease family signature	PR00791	1.9E-31| PRINTS	Peptidyl-dipeptidase A (M2) metalloprotease family signature	PR00791	1.9E-31| PRINTS	Peptidyl-dipeptidase A (M2) metalloprotease family signature	PR00791	1.9E-31| PRINTS	Peptidyl-dipeptidase A (M2) metalloprotease family signature	PR00791	1.9E-31""""""";10;563;65010.28047;NA;NA
Putative Metalloprotease;Enzyme;Male	Expressionlevel;Signal Peptide	CS pos: 22-23. Pr: 0.7847	0.7847;Stop codon present;6	Digestion Sp2;83	315.27;NA;76	227.07;NA;>TRINITY_DN66_c0_g1_i6:True:75;>TRINITY_DN5487_c0_g1_i1:True:16;ATTCTAACAGCTGTCTTATAACCTGACATAAAGATAATATAAAATATTTCTAACCATATATAAATGCTAGTTTAGGATAAGAGAATAAGCCAATTCTGTGGTTGCAAACCAATAGAAATGGGTTTAATTTTACACTTGTTTCTTTCAACCTGGTTGAATCTTCAGAGCAGTGGCGTTTTCGGATCATGTCTGGTATCGCAAGATACACAGGAATTCCAGTATATGATGAACCAGAATCAGAAATTGTATGATGCCTGTATGAACAAAAGACTTCCAAACTTCGATCCTATACCAATTGAAAACTGGGAAAGTTACAGTGAACCTA…	33.455	550	0.8461538461538461;15240.1;70.1142;20.7057;NA;NA;NA;tr|A0A1W7R9Y0|A0A1W7R9Y0_9SCOR	600; Angiotensin-converting enzyme OS=Hadrurus spadix OX=141984 PE=3 SV=1;54.093	562	0.0;Orbitrapmatches	Transcriptome;Insolution_Sp9Female	TRINITY_DN5487_c0_g1_i1:True:16	100.000	595	1.0;Transcriptome_Sp9Female	TRINITY_DN5487_c0_g1_i1:True:16	100.000	595	1.0;GO:0006508: proteolysis (biological_process)| GO:0008237: metallopeptidase activity (molecular_function)| GO:0008241: peptidyl-dipeptidase activity (molecular_function)| GO:0016020: membrane (cellular_component);"""""""CDD	M2_ACE	1.81451E-129| PRINTS	Peptidyl-dipeptidase A (M2) metalloprotease family signature	PR00791	1.7E-31| PRINTS	Peptidyl-dipeptidase A (M2) metalloprotease family signature	PR00791	1.7E-31| PRINTS	Peptidyl-dipeptidase A (M2) metalloprotease family signature	PR00791	1.7E-31| PRINTS	Peptidyl-dipeptidase A (M2) metalloprotease family signature	PR00791	1.7E-31| PRINTS	Peptidyl-dipeptidase A (M2) metalloprotease family signature	PR00791	1.7E-31| Coils	Coil	Coil	-| Pfam	Angiotensin-converting enzyme	PF01401	1.3E-97| PANTHER	ANGIOTENSIN-CONVERTING ENZYME	PTHR10514	4.3E-101| SUPERFAMILY	Metalloproteases (""""""""zincins"""""""")	catalytic domain
Putative Metalloprotease;Enzyme;Unspecific;Signal Peptide	CS pos: 22-23. Pr: 0.7847	0.7847;Stop codon present;10	Digestion Sp2;83	309.6;NA;76	227.07;NA;>TRINITY_DN66_c0_g1_i11:True:75;>TRINITY_DN5487_c0_g1_i1:True:16;ATTCTAACAGCTGTCTTATAACCTGACATAAAGATAATATAAAATATTTCTAACCATATATAAATGCTAGTTTAGGATAAGAGAATAAGCCAATTCTGTGGTTGCAAACCAATAGAAATGGGTTTAATTTTACACTTGTTTCTTTCAACCTGGTTGAATCTTCAGAGCAGTGGCGTTTTCGGATCATGTCTGGTATCGCAAGATACACAGGAATTCCAGTATATGATGAACCAGAATCAGAAATTGTATGATGCCTGTATGAACAAAAGACTTCCAAACTTCGATCCTATACCAATTGAAAACTGGGAAAGTTACAGTGAACCT…	35.963	545	0.7944606413994169;82.5785;70.1142;92.312;NA;NA;NA;tr|A0A1W7R9Y0|A0A1W7R9Y0_9SCOR	600; Angiotensin-converting enzyme OS=Hadrurus spadix OX=141984 PE=3 SV=1;54.626	562	0.0;Orbitrapmatches	Transcriptome;Insolution_Sp9Female	TRINITY_DN5487_c0_g1_i1:True:16	98.487	595	1.0;Transcriptome_Sp9Female	TRINITY_DN5487_c0_g1_i1:True:16	98.487	595	1.0;GO:0006508: proteolysis (biological_process)| GO:0008237: metallopeptidase activity (molecular_function)| GO:0008241: peptidyl-dipeptidase activity (molecular_function)| GO:0016020: membrane (cellular_component);"""""""CDD	M2_ACE	3.53873E-129| PRINTS	Peptidyl-dipeptidase A (M2) metalloprotease family signature	PR00791	1.1E-31| PRINTS	Peptidyl-dipeptidase A (M2) metalloprotease family signature	PR00791	1.1E-31| PRINTS	Peptidyl-dipeptidase A (M2) metalloprotease family signature	PR00791	1.1E-31| PRINTS	Peptidyl-dipeptidase A (M2) metalloprotease family signature	PR00791	1.1E-31| PRINTS	Peptidyl-dipeptidase A (M2) metalloprotease family signature	PR00791	1.1E-31| SUPERFAMILY	Metalloproteases (""""""""zincins"""""""")	catalytic domain	SSF55486	1.38E-80| PANTHER	ANGIOTENSIN-CONVERTING ENZYME	PTHR10514	9.2E-102| Coils	Coil	Coil	-| Pfam	Angiotensin-converting enzyme	PF01401
Putative Metalloprotease;Enzyme;Male	Absence;Signal Peptide	CS pos: 21-22. Pr: 0.8158	0.8158;Stop codon present;15	Digestion Sp2;71	274.38;NA;NA;NA;>TRINITY_DN62_c0_g1_i1:False:1924;;TTTTTTTTTTTGCTTCTTAAGAATATATTTATTGCATATATAATTTGAGCCAACGAATCAAAAAAGCATTTAGTAATACACCTATAAATTTAAGTACATAATGGATTTGATGCGCTATTTTGGGGGCACACCATTGGATCATCACTCTTCCATCCTACGGTTTCATCTTTGTTTTCTTTCTTCAGCCATTCGTACAAAGGTTGAAAGTACTCCAAAAGTGGATCTGTGTCCATTTTATCGGATGCGCCATTTGTCATTATAGATATCGCTTCGGGAGATGGTACTGAGTTTCCAAGATAAATAATATTTCTGATTTTGTCTCCAAATGCCTTTTCTCCGTACAAGCTA…	34.501	571	0.8784615384615385;286.724;NA;20.7057;NA;NA;NA;tr|A0A1W7RA12|A0A1W7RA12_9SCOR	523; Angiotensin-converting enzyme OS=Hadrurus spadix OX=141984 PE=3 SV=1;39.089	527	5.09e-124;;Insolution_Sp9Female	TRINITY_DN1387_c0_g1_i1:True:0	54.153	602	0.9933993399339934;Transcriptome_Sp9Female	TRINITY_DN6967_c0_g1_i3:False:1888	70.100	602	0.9933993399339934;GO:0006508: proteolysis (biological_process)| GO:0008237: metallopeptidase activity (molecular_function)| GO:0008241: peptidyl-dipeptidase activity (molecular_function)| GO:0016020: membrane (cellular_component);"""""""PRINTS	Peptidyl-dipeptidase A (M2) metalloprotease family signature	2.1E-24| PRINTS	Peptidyl-dipeptidase A (M2) metalloprotease family signature	PR00791	2.1E-24| PRINTS	Peptidyl-dipeptidase A (M2) metalloprotease family signature	PR00791	2.1E-24| PRINTS	Peptidyl-dipeptidase A (M2) metalloprotease family signature	PR00791	2.1E-24| PANTHER	ANGIOTENSIN-CONVERTING ENZYME	PTHR10514	6.6E-100| SUPERFAMILY	Metalloproteases (""""""""zincins"""""""")	catalytic domain	SSF55486	6.11E-85| CDD	M2_ACE	cd06461	1.93116E-135| Pfam	Angiotensin-converting enzyme	PF01401	5.5E-103""""""";11;585;68519.00596;NA;NA
Putative Metalloprotease;Enzyme;Unspecific;Signal Peptide	CS pos: 19-20. Pr: 0.9817	0.9817;Stop codon present;17	Digestion Sp2;70	271.46;NA;74	237.65;7	92.05;>TRINITY_DN337_c0_g1_i6:False:2566;>TRINITY_DN149_c0_g1_i5:True:137;ATTGCATGAAATTTTTAAAGTAGCAGGCATAATATCTCTACTGGAAGATCTGGTAAGCAAATAATGACGTACTTGCTACGTTCCTACTATGATTATTTATTTAACTTTTACAGGTAATTGATTTTATTAAATTGTAACAATTTTAAATTCTACTGAACACTAAATGATATATGATTTTATTAGTTATTGCGTTTAGTCAATGTAGTTGGACAGTGTAATTTGATCTGGTAATAACTTTTAGTATAACAAGTTTACATTGTATTAATGTATATTCGACATAAATATCTTTATTGATTTCCAATAATATCATTAATACATTTTTTCG…	48.553	622	0.9569230769230769;1086.26;1446.79;20.7057;NA;NA;NA;tr|A0A1W7RB55|A0A1W7RB55_9SCOR	621; Angiotensin-converting enzyme OS=Hadrurus spadix OX=141984 PE=3 SV=1;47.994	623	0.0;Orbitrapmatches	Transcriptome;Insolution_Sp9Female	TRINITY_DN149_c0_g1_i5:True:137	100.000	621	1.0;Transcriptome_Sp9Female	TRINITY_DN149_c0_g1_i5:True:137	100.000	621	1.0;GO:0006508: proteolysis (biological_process)| GO:0008237: metallopeptidase activity (molecular_function)| GO:0008241: peptidyl-dipeptidase activity (molecular_function)| GO:0016020: membrane (cellular_component);"""""""SUPERFAMILY	Metalloproteases (""""""""zincins"""""""")	catalytic domain	2.56E-166| PRINTS	Peptidyl-dipeptidase A (M2) metalloprotease family signature	PR00791	3.3E-49| PRINTS	Peptidyl-dipeptidase A (M2) metalloprotease family signature	PR00791	3.3E-49| PRINTS	Peptidyl-dipeptidase A (M2) metalloprotease family signature	PR00791	3.3E-49| PRINTS	Peptidyl-dipeptidase A (M2) metalloprotease family signature	PR00791	3.3E-49| PRINTS	Peptidyl-dipeptidase A (M2) metalloprotease family signature	PR00791	3.3E-49| PRINTS	Peptidyl-dipeptidase A (M2) metalloprotease family signature	PR00791	3.3E-49| PRINTS	Peptidyl-dipeptidase A (M2) metalloprotease family signature	PR00791	3.3E-49| Pfam	Angiotensin-converting enzyme	PF01401	4.8E-181| CDD	M2_ACE
Putative Metalloprotease;Enzyme;Male	Absence;Signal Peptide	CS pos: 21-22. Pr: 0.9808	0.9808;Stop codon present;21	Digestion Sp2;64	246.11;NA;NA;NA;>TRINITY_DN62_c0_g2_i1:False:2001;;TAATTTTATTTTTTTTTTTTATATGTTTTTTTTTATTAAATTTTTTTTTTTTATTTTTTTTTTATAAATATTTTTTTTTTTTTTTTTTATGCTTCATATGAATATATTTATTCCATATATAATTTGATACAAGAATCGAATATAAGCATTTAACAATATATCTATAAATTTAAGTGCATGATTGGTTTCATGCGCTATTTTCAGGGCACAACATTGGATCATCACTCTTCCATCCTACGGTTTCGTTTCTGTTTTGTATCTTCAGCCATTCGTACAAAGGTCGAAAGTACTCCAAAAGTGGCTTTGTGTCCATTTTATCGGATGCGCCATTTGTCATCATAGATAGAG…	35.145	552	0.8492307692307692;89.8861;NA;20.7057;NA;NA;NA;tr|A0A1W7RA12|A0A1W7RA12_9SCOR	523; Angiotensin-converting enzyme OS=Hadrurus spadix OX=141984 PE=3 SV=1;38.899	527	6.25e-131;;Insolution_Sp9Female	TRINITY_DN1387_c0_g1_i2:True:0	56.500	600	1.001669449081803;Transcriptome_Sp9Female	TRINITY_DN6967_c0_g1_i3:False:1888	80.301	599	1.0;GO:0006508: proteolysis (biological_process)| GO:0008237: metallopeptidase activity (molecular_function)| GO:0008241: peptidyl-dipeptidase activity (molecular_function)| GO:0016020: membrane (cellular_component);"""""""PRINTS	Peptidyl-dipeptidase A (M2) metalloprotease family signature	1.2E-26| PRINTS	Peptidyl-dipeptidase A (M2) metalloprotease family signature	PR00791	1.2E-26| PRINTS	Peptidyl-dipeptidase A (M2) metalloprotease family signature	PR00791	1.2E-26| PRINTS	Peptidyl-dipeptidase A (M2) metalloprotease family signature	PR00791	1.2E-26| PRINTS	Peptidyl-dipeptidase A (M2) metalloprotease family signature	PR00791	1.2E-26| SUPERFAMILY	Metalloproteases (""""""""zincins"""""""")	catalytic domain	SSF55486	1.67E-80| PANTHER	ANGIOTENSIN-CONVERTING ENZYME	PTHR10514	1.7E-92| CDD	M2_ACE	cd06461	2.85662E-125| Pfam	Angiotensin-converting enzyme	PF01401	1.6E-97""""""";11;578;67737.84647;NA;NA
Putative Metalloprotease;Enzyme;Unspecific;Signal Peptide	CS pos: 19-20. Pr: 0.9817	0.9817;Stop codon present;33	Digestion Sp2;61	230.97;NA;74	237.65;7	92.05;>TRINITY_DN337_c0_g1_i9:False:3047;>TRINITY_DN149_c0_g1_i4:True:137;ATTGCATGAAATTTTTAAAGTAGCAGGCATAATATCTCTACTGGAAGATCTGGTAAGCAAATAATGACGTACTTGCTACGTTCCTACTATGATTATTTATTTAACTTTTACAGGTAATTGATTTTATTAAATTGTAACAATTTTAAATTCTACTGAACACTAAATGATATATGATTTTATTAGTTATTGCGTTTAGTCAATGTAGTTGGACAGTGTAATTTGATCTGGTAATAACTTTTAGTATAACAAGTTTACATTGTATTAATGTATATTCGACATAAATATCTTTATTGATTTCCAATAATATCATTAATACATTTTTTCG…	44.495	436	0.6707692307692308;104.155;36.1218;20.7057;NA;NA;NA;tr|A0A1W7RB55|A0A1W7RB55_9SCOR	621; Angiotensin-converting enzyme OS=Hadrurus spadix OX=141984 PE=3 SV=1;43.936	437	2.95e-132;Orbitrapmatches	Transcriptome;Insolution_Sp9Female	TRINITY_DN149_c0_g1_i5:True:137	98.206	446	0.9977628635346756;Transcriptome_Sp9Female	TRINITY_DN149_c0_g1_i4:True:137	100.000	447	1.0;GO:0006508: proteolysis (biological_process)| GO:0008237: metallopeptidase activity (molecular_function)| GO:0008241: peptidyl-dipeptidase activity (molecular_function)| GO:0016020: membrane (cellular_component);"""""""Pfam	Angiotensin-converting enzyme	6.1E-113| PRINTS	Peptidyl-dipeptidase A (M2) metalloprotease family signature	PR00791	7.7E-19| PRINTS	Peptidyl-dipeptidase A (M2) metalloprotease family signature	PR00791	7.7E-19| PRINTS	Peptidyl-dipeptidase A (M2) metalloprotease family signature	PR00791	7.7E-19| PRINTS	Peptidyl-dipeptidase A (M2) metalloprotease family signature	PR00791	7.7E-19| PANTHER	ANGIOTENSIN-CONVERTING ENZYME	PTHR10514	7.0E-115| SUPERFAMILY	Metalloproteases (""""""""zincins"""""""")	catalytic domain	SSF55486	2.93E-102| CDD	M2_ACE	cd06461	3.79909E-150""""""";8;428;49557.25701;NA;NA
Putative Metalloprotease;Enzyme;Unspecific;Signal Peptide	CS pos: 19-20. Pr: 0.9858	0.9858;Stop codon present;60	Digestion Sp2;37	179.7;2	40.04;43	160.44;27	150.03;>TRINITY_DN30797_c0_g1_i1:False:2623;>TRINITY_DN43540_c0_g1_i1:True:1;CTACAGGCAAAATATTATACTTTTCCCAATCTTTAATGTAATATTTTTGCAACTTAATTGTGTAATGCATTTTTTGTTTCTGGAATTTTTTACATATCTGCATTCACATTCACTAACTTCTGCAATGCTGCAGAAAGATAATTAAAATTTGAAACTTACAGCCGTGACAGAAAACACCATAAAATAAATTAATATCCAGCAATAATAAAGTTAGACATTGCCATATTTTTCTATAGTTCAATTTGGAAAATAATTATTTACAGCTGTATTACTATAAGTATGAGCTGCGTAAGAAGTCTTTTTAATGCTGTATATACAGAGT…	100.000	491	0.9939271255060729;57.8498;60.4842;50.6677;NA;NA;NA;tr|A0A1S5QN46|A0A1S5QN46_TITSE	473; Carboxypeptidase E OS=Tityus serrulatus OX=6887 PE=2 SV=1;70.675	474	0.0;Orbitrapmatches	Transcriptome;Insolution_Sp9Female	TRINITY_DN43540_c0_g1_i1:True:1	100.000	478	1.0;Transcriptome_Sp9Female	TRINITY_DN43540_c0_g1_i1:True:1	100.000	478	1.0;GO:0004181: metallocarboxypeptidase activity (molecular_function)| GO:0006518: peptide metabolic process (biological_process)| GO:0008270: zinc ion binding (molecular_function)| GO:0006508: proteolysis (biological_process);SUPERFAMILY	Carboxypeptidase regulatory domain-like	9.02E-15| CDD	Peptidase_M14NE-CP-C_like	cd11308	9.12578E-26| PANTHER	CARBOXYPEPTIDASE D	PTHR11532:SF73	6.4E-166| PRINTS	Carboxypeptidase A metalloprotease (M14) family signature	PR00765	2.9E-13| PRINTS	Carboxypeptidase A metalloprotease (M14) family signature	PR00765	2.9E-13| PRINTS	Carboxypeptidase A metalloprotease (M14) family signature	PR00765	2.9E-13| PRINTS	Carboxypeptidase A metalloprotease (M14) family signature	PR00765	2.9E-13| Pfam	Zinc carboxypeptidase	PF00246	6.1E-66| Gene3D	-	G3DSA:2.60.40.1120	7.8E-21| ProSitePatterns	Zinc carboxypeptidases
Putative Metalloprotease;Enzyme;Male	Absence;Signal Peptide	CS pos: 23-24. Pr: 0.5614	0.5614;Stop codon present;154_1	Digestion Sp2;14	100.99;NA;NA;NA;>TRINITY_DN19_c0_g1_i5:True:100;;CACATCTGTGTTATGATGGATGTAGCTTGAGCATAAAATGCTTTTAACTAGATATATATTAATGCAGTCTTTAGAAACCGTATGATTTCTGTTATGTTAAGAGTTCAAAGATATGGTTTTAATTCAGTGTTTGATTCTTTTAACATTGCTAAATTTTCATTTGACTGATGTTCTCGAGTCATGCCCAATGTCAAATGAAGAACTGGAGTTGAAGTATATGATGGAACAGAATTATGTATTAAACCTCGCTTGTATGAAAAACGAACGCCCACATTTCAGTCCCATACACGGTGGTATCCAGCAGAATCTGAGCAGCCCTATCTATCAAAGAGCGTATAATATAATTTCAT…	33.095	559	0.86;66.6526;NA;20.7057;NA;NA;NA;tr|A0A1W7R9Y0|A0A1W7R9Y0_9SCOR	600; Angiotensin-converting enzyme OS=Hadrurus spadix OX=141984 PE=3 SV=1;54.470	604	0.0;;Insolution_Sp9Female	TRINITY_DN5487_c0_g1_i3:True:93	59.464	597	1.0033613445378151;Transcriptome_Sp9Female	TRINITY_DN5487_c0_g1_i3:True:93	59.464	597	1.0033613445378151;GO:0006508: proteolysis (biological_process)| GO:0008237: metallopeptidase activity (molecular_function)| GO:0008241: peptidyl-dipeptidase activity (molecular_function)| GO:0016020: membrane (cellular_component);"""""""Pfam	Angiotensin-converting enzyme	1.5E-101| PANTHER	ANGIOTENSIN-CONVERTING ENZYME	PTHR10514	9.0E-105| CDD	M2_ACE	cd06461	1.7821E-131| PRINTS	Peptidyl-dipeptidase A (M2) metalloprotease family signature	PR00791	9.6E-32| PRINTS	Peptidyl-dipeptidase A (M2) metalloprotease family signature	PR00791	9.6E-32| PRINTS	Peptidyl-dipeptidase A (M2) metalloprotease family signature	PR00791	9.6E-32| PRINTS	Peptidyl-dipeptidase A (M2) metalloprotease family signature	PR00791	9.6E-32| PRINTS	Peptidyl-dipeptidase A (M2) metalloprotease family signature	PR00791	9.6E-32| SUPERFAMILY	Metalloproteases (""""""""zincins"""""""")	catalytic domain	SSF55486	3.57E-87""""""";12;572;67069.10343;NA;NA
Putative Metalloprotease;Enzyme;Male	Absence;Signal Peptide	CS pos: 23-24. Pr: 0.5614	0.5614;Stop codon present;154_3	Digestion Sp2;14	100.99;NA;NA;NA;>TRINITY_DN19_c0_g1_i7:True:100;;CACATCTGTGTTATGATGGATGTAGCTTGAGCATAAAATGCTTTTAACTAGATATATATTAATGCAGTCTTTAGAAACCGTATGATTTCTGTTATGTTAAGAGTTCAAAGATATGGTTTTAATTCAGTGTTTGATTCTTTTAACATTGCTAAATTTTCATTTGACTGATGTTCTCGAGTCATGCCCAATGTCAAATGAAGAACTGGAGTTGAAGTATATGATGGAACAGAATTATGTATTAAACCTCGCTTGTATGAAAAACGAACGCCCACATTTCAGTCCCATACACGGTGGTATCCAGCAGAATCTGAGCAGCCCTATCTATCAAAGAGCGTATAATATAATTTCAT…	35.687	524	0.7638483965014577;168.579;NA;92.312;tr|A0A2L2YPW7|A0A2L2YPW7_PARTP	483; Protein phosphatase 1 regulatory inhibitor subunit 16B OS=Parasteatoda tepidariorum OX=114398 PE=2 SV=1;26.190	84	0.069;tr|A0A1W7R9Y0|A0A1W7R9Y0_9SCOR	600; Angiotensin-converting enzyme OS=Hadrurus spadix OX=141984 PE=3 SV=1;54.305	604	0.0;;Insolution_Sp9Female	TRINITY_DN5487_c0_g1_i3:True:93	59.464	597	1.0033613445378151;Transcriptome_Sp9Female	TRINITY_DN5487_c0_g1_i3:True:93	59.464	597	1.0033613445378151;GO:0006508: proteolysis (biological_process)| GO:0008237: metallopeptidase activity (molecular_function)| GO:0008241: peptidyl-dipeptidase activity (molecular_function)| GO:0016020: membrane (cellular_component);"""""""PRINTS	Peptidyl-dipeptidase A (M2) metalloprotease family signature	7.2E-32| PRINTS	Peptidyl-dipeptidase A (M2) metalloprotease family signature	PR00791	7.2E-32| PRINTS	Peptidyl-dipeptidase A (M2) metalloprotease family signature	PR00791	7.2E-32| PRINTS	Peptidyl-dipeptidase A (M2) metalloprotease family signature	PR00791	7.2E-32| PRINTS	Peptidyl-dipeptidase A (M2) metalloprotease family signature	PR00791	7.2E-32| PANTHER	ANGIOTENSIN-CONVERTING ENZYME	PTHR10514	1.6E-105| Pfam	Angiotensin-converting enzyme	PF01401	9.8E-103| CDD	M2_ACE	cd06461	2.926E-131| SUPERFAMILY	Metalloproteases (""""""""zincins"""""""")	catalytic domain	SSF55486	3.85E-88""""""";13;572;66885.92988;NA;NA
Putative Metalloprotease;Enzyme;Female	Absence;Signal Peptide	CS pos: 21-22. Pr: 0.9814	0.9814;Stop codon present;16	Digestion Sp9;NA;NA;44	198.29;NA;;>TRINITY_DN1387_c0_g1_i2:True:0;CCTGTGATTATGTGGTTCAATTACTCGAAAGTTGTATTGTTTTTGCTTTTCGTAATTAGAAAAAATGAAGGTGAATTGATTTCAGATGAAAATGAAGCTTGGGAATTCCTTCGCTGTAGAGACGAAACAGTCATTAGTCGTTGCGAGAATAAAGAAGATTGGCTGTTTTTTGACATTGGCAAGACAACCGGCGACTTTGCTTGGCAAAACTTCACTGATCCTTTACTGAAAAGAGCATTTCGGATAACAGCCAGTAACGAAGAGGATATTTTGAACTTGCGAATATTATTAACTTCTGAGCGACCTCGTGAAGAAGATAGAAAAAGTGAAGACATCGATAATATTTACTTAAATTC…	33.694	555	0.8090379008746356;;2.09964;92.312;NA;NA;NA;tr|A0A1W7RA12|A0A1W7RA12_9SCOR	523; Angiotensin-converting enzyme OS=Hadrurus spadix OX=141984 PE=3 SV=1;36.138	523	6.51e-111;;Insolution_Sp2Male	TRINITY_DN62_c0_g2_i1:False:2001	56.500	600	1.0033444816053512;Transcriptome_Sp2Male	TRINITY_DN164_c0_g1_i11:False:3903	99.398	498	0.8327759197324415;GO:0006508: proteolysis (biological_process)| GO:0008237: metallopeptidase activity (molecular_function)| GO:0008241: peptidyl-dipeptidase activity (molecular_function)| GO:0016020: membrane (cellular_component);"""""""SUPERFAMILY	Metalloproteases (""""""""zincins"""""""")	catalytic domain	6.11E-82| Pfam	Angiotensin-converting enzyme	PF01401	6.5E-92| PRINTS	Peptidyl-dipeptidase A (M2) metalloprotease family signature	PR00791	9.4E-27| PRINTS	Peptidyl-dipeptidase A (M2) metalloprotease family signature	PR00791	9.4E-27| PRINTS	Peptidyl-dipeptidase A (M2) metalloprotease family signature	PR00791	9.4E-27| PRINTS	Peptidyl-dipeptidase A (M2) metalloprotease family signature	PR00791	9.4E-27| PRINTS	Peptidyl-dipeptidase A (M2) metalloprotease family signature	PR00791	9.4E-27| PANTHER	ANGIOTENSIN-CONVERTING ENZYME	PTHR10514	1.3E-87""""""";11;577;67760.79904;NA;NA
Putative Metalloprotease;Enzyme;Female	Absence;Signal Peptide	CS pos: 21-22. Pr: 0.9813	0.9813;Stop codon present;16_1	Digestion Sp9;NA;NA;44	198.29;NA;;>TRINITY_DN1387_c0_g1_i1:True:0;CCTGTGATTATGTGGTTCAATTACTCGAAAGTTGTATTGTTTTTGCTTTTCGTAATTAGAAAAAATGAAGGTGAATTGATTTCAGATGAAAATGAAGCTTGGGAATTCCTTCGCTGTAGAGACGAAACAGTCATTAGTCGTTGCGAGAATAAAGAAGATTGGCTGTTTTTTGACATTGGCAAGACAACCGGCGACTTTGCTTGGCAAAACTTCACTGATCCTTTACTGAAAAGAGCATTTCGGATAACAGCCAGTAACGAAGAGGATATTTTGAACTTGCGAATATTATTAACTTCTGAGCGACCTCGTGAAGAAGATAGAAAAAGTGAAGACATCGATAATATTTACTTAAATTC…	33.874	555	0.8090379008746356;;15.7473;92.312;NA;NA;NA;tr|A0A1W7RA12|A0A1W7RA12_9SCOR	523; Angiotensin-converting enzyme OS=Hadrurus spadix OX=141984 PE=3 SV=1;36.329	523	3.22e-112;;Insolution_Sp2Male	TRINITY_DN62_c0_g2_i1:False:2001	56.333	600	1.0033444816053512;Transcriptome_Sp2Male	TRINITY_DN164_c0_g1_i11:False:3903	99.598	498	0.8327759197324415;GO:0006508: proteolysis (biological_process)| GO:0008237: metallopeptidase activity (molecular_function)| GO:0008241: peptidyl-dipeptidase activity (molecular_function)| GO:0016020: membrane (cellular_component);"""""""SUPERFAMILY	Metalloproteases (""""""""zincins"""""""")	catalytic domain	1.47E-82| Pfam	Angiotensin-converting enzyme	PF01401	3.3E-92| PRINTS	Peptidyl-dipeptidase A (M2) metalloprotease family signature	PR00791	9.4E-27| PRINTS	Peptidyl-dipeptidase A (M2) metalloprotease family signature	PR00791	9.4E-27| PRINTS	Peptidyl-dipeptidase A (M2) metalloprotease family signature	PR00791	9.4E-27| PRINTS	Peptidyl-dipeptidase A (M2) metalloprotease family signature	PR00791	9.4E-27| PRINTS	Peptidyl-dipeptidase A (M2) metalloprotease family signature	PR00791	9.4E-27| PANTHER	ANGIOTENSIN-CONVERTING ENZYME	PTHR10514	3.3E-88""""""";11;577;67688.77791;NA;NA
Putative Metalloprotease;Enzyme;Unspecific;Signal Peptide	CS pos: 34-35. Pr: 0.9226	0.9226;Stop codon present;57	Digestion Sp9;NA;NA;22	140.63;NA;>TRINITY_DN2205_c0_g2_i4:False:2244;>TRINITY_DN668_c0_g1_i1:True:188;TAGTACGTTAAGTTCCCCGTCGCTGCCATTTTGTCTATTTAAACCGACACACACACAGCTGTAGTTATAAACGTTTGTGATAGTTTTCCATCGGTACATACTGAAACGTTCGGAAAATGCGGATAAAAGCAATAAAATTCGATAACGATGTTCGCATTAAATTTGCCATATGTTCGATACGCGTGTAATATAGCTTTTTGACACACAGAACAGAGGCTACAACAGGGTCACCGATGACTTGGTTGTATCAAAGACATCGGAAAAGATCTACGATTCTAGGGTCATCAGTTTTGCTTATACTGTTAGGTGTTGTAGGCTTG…	33.237	689	0.893644617380026;14.5575;115.603;4.18213;sp|W4VS99|NEP_TRILK	723; Neprilysin-1 OS=Trittame loki OX=1295018 PE=1 SV=1;28.138	725	1.01e-102;tr|A0A1W7RA46|A0A1W7RA46_9SCOR	716; Neprilysin OS=Hadrurus spadix OX=141984 PE=3 SV=1;77.902	715	0.0;Transcriptome;No hits in Other Sex;Transcriptome_Sp2Male	TRINITY_DN2205_c0_g2_i4:False:2244	100.000	715	1.0;GO:0004222: metalloendopeptidase activity (molecular_function)| GO:0006508: proteolysis (biological_process)| GO:0008237: metallopeptidase activity (molecular_function);"""""""Gene3D	Neutral endopeptidase	2.8E-193| PRINTS	Neprilysin metalloprotease (M13) family signature	PR00786	4.3E-9| PRINTS	Neprilysin metalloprotease (M13) family signature	PR00786	4.3E-9| PRINTS	Neprilysin metalloprotease (M13) family signature	PR00786	4.3E-9| Pfam	Peptidase family M13	PF01431	3.2E-59| PANTHER	NEPRILYSIN-1	PTHR11733:SF216	7.1E-154| Pfam	Peptidase family M13	PF05649	5.5E-79| Gene3D	Collagenase (Catalytic Domain)	G3DSA:3.40.390.10	2.8E-193| SUPERFAMILY	Metalloproteases (""""""""zincins"""""""")	catalytic domain	SSF55486	9.67E-175| CDD	M13	cd08662	0.0| Coils	Coil	Coil
Putative serine protease;Enzyme;Unspecific;Signal Peptide	CS pos: 17-18. Pr: 0.9793	0.9793;Stop codon present;41	Digestion Sp2;71	214.52;3	35.62;73	189.41;NA;>TRINITY_DN9345_c0_g2_i1:False:1028;>TRINITY_DN2391_c0_g1_i1:False:1026;TTTTTTTTTTTTTAAAGGAATATCAATTTTATTATGTATCAAACTGAAGTATAACTCTGCACCTGGATATTGCAAATACCGTAAACGTAATGGCAGCGTGTGCAAAAATTCGAATCTATTTCCATTACACCTACACAATAAAAGTTTCGACATAATACTAAATTACGCTAAAAACATTTTCAGAAAGATTGCTTTTTTAATTTATTTGAACAAATGACGCAAAAAATTTTACTGAAGGACACATATAGGTTTGTCCACAATTGTTGCAATCCAGTTGGCATAATATCCGACATCGGTAAAAATCTCGGGATAGGCAT…	33.569	283	0.9895104895104895;969.146;1645.16;11.0768;tr|A0A2B4STD3|A0A2B4STD3_STYPI	539; Plasma kallikrein OS=Stylophora pistillata OX=50429 GN=Klkb1 PE=4 SV=1;31.660	259	4.74e-27;tr|A0A1W7R9J1|A0A1W7R9J1_9SCOR	265; Serine proteinase OS=Hadrurus spadix OX=141984 PE=4 SV=1;66.415	265	1.98e-131;Orbitrapmatches	Transcriptome;Insolution_Sp9Female	TRINITY_DN2391_c0_g1_i1:False:1026	100.000	265	1.0;Transcriptome_Sp9Female	TRINITY_DN2391_c0_g1_i1:False:1026	100.000	265	1.0;GO:0004252: serine-type endopeptidase activity (molecular_function)| GO:0006508: proteolysis (biological_process);PRINTS	Chymotrypsin serine protease family (S1) signature	1.3E-13| PRINTS	Chymotrypsin serine protease family (S1) signature	PR00722	1.3E-13| PRINTS	Chymotrypsin serine protease family (S1) signature	PR00722	1.3E-13| ProSiteProfiles	Serine proteases	trypsin domain profile.	PS50240	24.954| SMART	trypsin_2	SM00020	4.1E-50| Pfam	Trypsin	PF00089	1.9E-48| Gene3D	-	G3DSA:2.40.10.10	7.6E-55| CDD	Tryp_SPc	cd00190	1.84518E-62| ProSitePatterns	Serine proteases
Putative serine protease;Enzyme;Unspecific;Signal Peptide	CS pos: 17-18. Pr: 0.9842	0.9842;Stop codon present;118	Digestion Sp2;32	124.13;NA;NA;NA;>TRINITY_DN213_c0_g1_i3:True:0;>TRINITY_DN36_c0_g1_i2:False:977;ATGCAGACTGTAACGCTCCTGCTTGTGTTATTTACCCTCCAGGTACAAGCCAGCTCGTTAAATGATAGTTCTTCAAGAATATATCATGGTCAATTAGCGGGCGAGCACGAGTTTCCTTTTGCTGTAAGACTTATGACATCTCTACCAAACGGCATGGCATCATTCTGTAGTGCTAGCCTAGCGTCGCCGAGTTACGTCATTACTGCCGGTCACTGTGTTCTTGACAAGTCAATTAATGAAGTCTATCAAGTTGAAAAGGTTGATGGTTTCATTGGCAATGCTGATGTCAGCGAAGCAAGAAATATAAAATTTCAAAAGA…	95.971	273	1.0036764705882353;46.5554;211.406;79.4325;tr|A0A6P8J2Y6|A0A6P8J2Y6_ACTTE	345; chymotrypsinogen B-like OS=Actinia tenebrosa OX=6105 GN=LOC116308097 PE=4 SV=1;29.508	244	2.99e-24;tr|T1E7M6|T1E7M6_UROMN	251; S1P-Uro-1 OS=Urodacus manicatus OX=1330407 PE=2 SV=1;37.288	236	9.23e-43;Transcriptome;Insolution_Sp9Female	TRINITY_DN36_c0_g1_i6:False:979	79.562	274	1.0036630036630036;Transcriptome_Sp9Female	TRINITY_DN36_c0_g1_i2:False:977	98.535	273	1.0;GO:0004252: serine-type endopeptidase activity (molecular_function)| GO:0006508: proteolysis (biological_process);CDD	Tryp_SPc	4.08401E-42| ProSiteProfiles	Serine proteases	trypsin domain profile.	PS50240	21.107| SUPERFAMILY	Trypsin-like serine proteases	SSF50494	1.46E-50| PANTHER	-	PTHR24260	6.2E-41| Pfam	Trypsin	PF00089	2.6E-33| ProSitePatterns	Serine proteases	trypsin family	histidine active site.	PS00134	-| SMART	trypsin_2	SM00020	2.0E-30| Gene3D	-	G3DSA:2.40.10.10	9.4E-47| PRINTS	Chymotrypsin serine protease family (S1) signature	PR00722
Putative serine protease;Enzyme;Unspecific;Signal Peptide	CS pos: 17-18. Pr: 0.9842	0.9842;Stop codon present;122	Digestion Sp2;27	123.21;NA;NA;NA;>TRINITY_DN213_c0_g1_i7:True:0;>TRINITY_DN36_c0_g1_i1:False:973;ATGCAGACTGTAACGCTCCTGCTTGTGTTATTTACCCTCCAGGTACAAGCCAGCTCGTTAAATGATAGTTCTTCAAGAATATATCATGGTCAATTAGCGGGCGAGCACGAGTTTCCTTTTGCTGTAAGACTTATGACATCTCTACCAAACGGCATGGCATCATTCTGTAGTGCTAGCCTAGCGTCGCCGAGTTACGTCATTACTGCCGGTCACTGTGTTCTTGACAAGTCAATTAATGAAGTCTATCAAGTTGAAAAGGTTGATGGTTTCATTGGCAATGCTGATGTCAGCGAAGCAAGAAATATAAAATTTCAAAAGA…	93.411	258	0.9485294117647058;43.724;86.4954;79.4325;tr|A0A2B4STD3|A0A2B4STD3_STYPI	539; Plasma kallikrein OS=Stylophora pistillata OX=50429 GN=Klkb1 PE=4 SV=1;30.769	260	4.11e-22;tr|T1E7M6|T1E7M6_UROMN	251; S1P-Uro-1 OS=Urodacus manicatus OX=1330407 PE=2 SV=1;36.864	236	1.44e-42;Transcriptome;Insolution_Sp9Female	TRINITY_DN36_c0_g1_i6:False:979	78.467	274	1.0073529411764706;Transcriptome_Sp9Female	TRINITY_DN36_c0_g1_i1:False:973	98.162	272	1.0;GO:0004252: serine-type endopeptidase activity (molecular_function)| GO:0006508: proteolysis (biological_process);Gene3D	-	9.2E-46| ProSitePatterns	Serine proteases	trypsin family	histidine active site.	PS00134	-| SMART	trypsin_2	SM00020	7.4E-31| PANTHER	-	PTHR24260	1.4E-39| CDD	Tryp_SPc	cd00190	6.49531E-42| SUPERFAMILY	Trypsin-like serine proteases	SSF50494	1.75E-49| Pfam	Trypsin	PF00089	7.2E-33| PRINTS	Chymotrypsin serine protease family (S1) signature	PR00722	8.3E-9| PRINTS	Chymotrypsin serine protease family (S1) signature	PR00722	8.3E-9| PRINTS
Putative serine protease;Enzyme;Male	Absence;Signal Peptide	CS pos: 19-20. Pr: 0.9838	0.9838;Stop codon present;156	Digestion Sp2;14	98.77;NA;NA;NA;>TRINITY_DN5838_c0_g2_i4:True:142;;CAAACAAACAAACTCGTGATGAGATATGACAACTCGTGATCGAAACTTTCAAAGTACGCAGGTCTTTTCTCTGCACTTTGCTTTTAGTTGTGGTAATTGACGGAAAGCAACGCATATCTTTAGTGAATACACCAGAAATTAACTGTGGAGTGTAAAAATGCATCTGTTGCCGACTGTGGTATCTGCAGTAATTTTATTCAATATTGCTTCAGCTTTAACTGTTTCAAACCCTGATGAAGTATTTGATTTACCAGGTCTTTCATATAAACTAAATTTTCACCATTATTCAGGTTATTTAAATGCATCAAATCAAAGATATTTGCACTATTGGTTTGTAGAGAGTCAGAAA…	89.677	465	1.0;2.03396;NA;67.9004;sp|C9WMM5|VCP_APIME	468; Venom serine carboxypeptidase OS=Apis mellifera OX=7460 PE=2 SV=1;31.773	406	5.82e-54;tr|A0A1W7RAT1|A0A1W7RAT1_9SCOR	467; Carboxypeptidase OS=Hadrurus spadix OX=141984 PE=3 SV=1;75.810	463	0.0;;No hits in Other Sex;Transcriptome_Sp9Female	TRINITY_DN12880_c0_g1_i1:False:1547	89.565	460	1.116504854368932;GO:0004185: serine-type carboxypeptidase activity (molecular_function)| GO:0006508: proteolysis (biological_process);ProSitePatterns	Serine carboxypeptidases	histidine active site.	-| PANTHER	SERINE PROTEASE FAMILY S10 SERINE CARBOXYPEPTIDASE	PTHR11802	9.5E-149| PANTHER	SERINE PROTEASE FAMILY S10 SERINE CARBOXYPEPTIDASE	PTHR11802	9.5E-149| PANTHER	CARBOXYPEPTIDASE	PTHR11802:SF388	9.5E-149| PANTHER	CARBOXYPEPTIDASE	PTHR11802:SF388	9.5E-149| Pfam	Serine carboxypeptidase	PF00450	8.0E-130| ProSitePatterns	Serine carboxypeptidases	serine active site.	PS00131	-| Gene3D	-	G3DSA:3.40.50.1820	8.4E-152| SUPERFAMILY	alpha/beta-Hydrolases	SSF53474	4.98E-120| PRINTS	Carboxypeptidase C serine protease (S10) family signature	PR00724	2.5E-29| PRINTS
Putative serine protease_variant;Enzyme;Unspecific;Signal Peptide	CS pos: 19-20. Pr: 0.9838	0.9838;Stop codon present;156_1	Digestion Sp2;13	98.77;NA;NA;NA;>TRINITY_DN5838_c0_g2_i2:True:142;>TRINITY_DN12880_c0_g1_i4:False:1547;CAAACAAACAAACTCGTGATGAGATATGACAACTCGTGATCGAAACTTTCAAAGTACGCAGGTCTTTTCTCTGCACTTTGCTTTTAGTTGTGGTAATTGACGGAAAGCAACGCATATCTTTAGTGAATACACCAGAAATTAACTGTGGAGTGTAAAAATGCATCTGTTGCCGACTGTGGTATCTGCAGTAATTTTATTCAATATTGCTTCAGCTTTAACTGTTTCAAACCCTGATGAAGTATTTGATTTACCAGGTCTTTCATATAAACTAAATTTTCACCATTATTCAGGTTATTTAAATGCATCAAATCAA…	100.000	465	1.0;15.7118;1.78456;67.9004;sp|C9WMM5|VCP_APIME	468; Venom serine carboxypeptidase OS=Apis mellifera OX=7460 PE=2 SV=1;30.645	434	6.05e-53;tr|A0A1W7RAT1|A0A1W7RAT1_9SCOR	467; Carboxypeptidase OS=Hadrurus spadix OX=141984 PE=3 SV=1;82.937	463	0.0;Transcriptome;No hits in Other Sex;Transcriptome_Sp9Female	TRINITY_DN12880_c0_g1_i4:False:1547	100.000	460	1.0;GO:0004185: serine-type carboxypeptidase activity (molecular_function)| GO:0006508: proteolysis (biological_process);PRINTS	Carboxypeptidase C serine protease (S10) family signature	3.3E-29| PRINTS	Carboxypeptidase C serine protease (S10) family signature	PR00724	3.3E-29| PRINTS	Carboxypeptidase C serine protease (S10) family signature	PR00724	3.3E-29| PRINTS	Carboxypeptidase C serine protease (S10) family signature	PR00724	3.3E-29| Gene3D	-	G3DSA:3.40.50.12670	4.6E-55| Gene3D	-	G3DSA:3.40.50.1820	5.8E-102| PANTHER	SERINE PROTEASE FAMILY S10 SERINE CARBOXYPEPTIDASE	PTHR11802	1.7E-158| PANTHER	CARBOXYPEPTIDASE	PTHR11802:SF388	1.7E-158| Pfam	Serine carboxypeptidase	PF00450	2.1E-140| ProSitePatterns	Serine carboxypeptidases	serine active site.	PS00131	-| ProSitePatterns	Serine carboxypeptidases	histidine active site.
Putative serine protease_variant;Enzyme;Male	Absence;Signal Peptide	CS pos: 19-20. Pr: 0.9838	0.9838;Stop codon present;156_3	Digestion Sp2;13	98.77;NA;NA;NA;>TRINITY_DN5838_c0_g2_i1:True:142;;CAAACAAACAAACTCGTGATGAGATATGACAACTCGTGATCGAAACTTTCAAAGTACGCAGGTCTTTTCTCTGCACTTTGCTTTTAGTTGTGGTAATTGACGGAAAGCAACGCATATCTTTAGTGAATACACCAGAAATTAACTGTGGAGTGTAAAAATGCATCTGTTGCCGACTGTGGTATCTGCAGTAATTTTATTCAATATTGCTTCAGCTTTAACTGTTTCAAACCCTGATGAAGTATTTGATTTACCAGGTCTTTCATATAAACTAAATTTTCACCATTATTCAGGTTATTTAAATGCATCAAATCAAAGATATTTGCACTATTGGTTTGTAGAGAGTCAGAAA…	100.000	437	0.9397849462365592;3.19893;NA;67.9004;sp|C9WMM5|VCP_APIME	468; Venom serine carboxypeptidase OS=Apis mellifera OX=7460 PE=2 SV=1;30.221	407	8.81e-45;tr|A0A1W7RAT1|A0A1W7RAT1_9SCOR	467; Carboxypeptidase OS=Hadrurus spadix OX=141984 PE=3 SV=1;81.922	437	0.0;;No hits in Other Sex;Transcriptome_Sp9Female	TRINITY_DN12880_c0_g1_i3:False:1550	100.000	432	0.9473684210526315;GO:0004185: serine-type carboxypeptidase activity (molecular_function)| GO:0006508: proteolysis (biological_process);PANTHER	CARBOXYPEPTIDASE	1.7E-147| Pfam	Serine carboxypeptidase	PF00450	6.0E-128| ProSitePatterns	Serine carboxypeptidases	serine active site.	PS00131	-| PANTHER	SERINE PROTEASE FAMILY S10 SERINE CARBOXYPEPTIDASE	PTHR11802	1.7E-147| PRINTS	Carboxypeptidase C serine protease (S10) family signature	PR00724	4.6E-22| PRINTS	Carboxypeptidase C serine protease (S10) family signature	PR00724	4.6E-22| PRINTS	Carboxypeptidase C serine protease (S10) family signature	PR00724	4.6E-22| Gene3D	-	G3DSA:3.40.50.1820	5.0E-143| SUPERFAMILY	alpha/beta-Hydrolases	SSF53474	1.25E-112;9;437;49319.28355;NA;NA
Putative serine protease;Enzyme;Unspecific;Signal Peptide	CS pos: 17-18. Pr: 0.9853	0.9853;Stop codon present;105	Digestion Sp9;NA;NA;33	99.87;NA;>TRINITY_DN11724_c0_g1_i1:False:1007;>TRINITY_DN42494_c0_g1_i1:True:245;GTTGATTGTGATATATTTTCGCACCTACAGCCTTTTAACATAAGGTATGGATGAAATTGATTACTGCTTATTGTGTTTATACATCTTAAGTACTCAACGAACTGTATAATTTACATCAGATATGCTCATTGCATCGCATTTTGAGGCGTGTATCATACACGTCTCAAAATACGAGTCTATAATTTTCAACGTCAGCCCATTTATCTTGTCAGTATAAATTCGTAGATTCTAAATCAAGTTTTTGACAGATGAAAATGGAGAAGTGCACTTTCTTTCTTGTGCTGTTTGTTTTTCAGGTGCGAGGAAGTCCGTTGGATG…	100.000	276	1.0;22.1854;59.4595;16.4071;tr|A0A6G5ZVQ6|A0A6G5ZVQ6_VIPAN	415; Transmembrane protease serine OS=Vipera anatolica senliki OX=2604287 PE=2 SV=1;28.000	250	1.60e-20;tr|T1E7M6|T1E7M6_UROMN	251; S1P-Uro-1 OS=Urodacus manicatus OX=1330407 PE=2 SV=1;35.656	244	2.46e-45;Transcriptome;Insolution_Sp2Male	TRINITY_DN213_c0_g1_i7:True:0	55.859	256	0.9377289377289377;Transcriptome_Sp2Male	TRINITY_DN11724_c0_g1_i1:False:1007	100.000	273	1.0;GO:0004252: serine-type endopeptidase activity (molecular_function)| GO:0006508: proteolysis (biological_process);CDD	Tryp_SPc	1.06805E-39| PANTHER	LP04014P-RELATED	PTHR24258:SF114	1.5E-35| SUPERFAMILY	Trypsin-like serine proteases	SSF50494	1.28E-46| PRINTS	Chymotrypsin serine protease family (S1) signature	PR00722	2.9E-9| PRINTS	Chymotrypsin serine protease family (S1) signature	PR00722	2.9E-9| PRINTS	Chymotrypsin serine protease family (S1) signature	PR00722	2.9E-9| PANTHER	SERINE PROTEASE-RELATED	PTHR24258	1.5E-35| Pfam	Trypsin	PF00089	2.6E-32| ProSitePatterns	Serine proteases	trypsin family	histidine active site.	PS00134	-| Gene3D
Putative serine protease;Enzyme;Unspecific;Signal Peptide	CS pos: 21-22. Pr: 0.9793	0.9793;Stop codon present;167	Digestion Sp9;NA;NA;15	73.56;NA;>TRINITY_DN1891_c0_g1_i1:True:14;>TRINITY_DN255_c0_g1_i3:False:957;TTTTTTTTTTTTTATGCCAAATATAAATTTATTTTCAAGTTTAAATACATTTTAATTAACTTGTTTTCTAATTTGTTTTGCATTTTTTTGCGAACATAAGTAAATACAGATTTCTTTACTCGGAAACGAATATTGGTTTCCCGACAGAATTTTCTTTGATCCATTCCATGAATGGCCCCACTGCAGTCAGTACACTGAGGGACTTGGCGCACTGGTCTATTATGTAAGACGAAATTCCTACCTGTATCTGCTTGTCAGAACGAGTAATAAAGTTTGGTCCTCCAGAGTCGCCAGAACAAACGCCTTTTCCCTTGGTAGAAATA…	100.000	280	1.0;8.24393;47.8985;20.9432;tr|A0A6P8J9F5|A0A6P8J9F5_ACTTE	327; chymotrypsinogen A-like OS=Actinia tenebrosa OX=6105 GN=LOC116308146 PE=4 SV=1;24.815	270	2.22e-19;tr|A0A834IUU3|A0A834IUU3_RHYFE	283; Uncharacterized protein OS=Rhynchophorus ferrugineus OX=354439 GN=GWI33_003891 PE=4 SV=1;31.507	292	2.39e-26;Transcriptome;Insolution_Sp2Male	TRINITY_DN8382_c0_g1_i2:False:1093	27.037	270	0.996309963099631;Transcriptome_Sp2Male	TRINITY_DN1891_c0_g1_i1:True:14	100.000	271	1.0;GO:0004252: serine-type endopeptidase activity (molecular_function)| GO:0006508: proteolysis (biological_process);PANTHER	POLYSERASE-RELATED	6.9E-37| SUPERFAMILY	Trypsin-like serine proteases	SSF50494	5.51E-46| CDD	Tryp_SPc	cd00190	2.98597E-38| ProSiteProfiles	Serine proteases	trypsin domain profile.	PS50240	20.748| Pfam	Trypsin	PF00089	3.5E-32| SMART	trypsin_2	SM00020	1.1E-28| Gene3D	-	G3DSA:2.40.10.10	3.6E-41;9;250;27401.04125;NA;NA
Putative serine protease_variant;Enzyme;Unspecific;Signal Peptide	CS pos: 34-35. Pr: 0.9794	0.9794;Stop codon present;167_2	Digestion Sp9;NA;NA;14	73.56;NA;>TRINITY_DN1891_c0_g1_i2:True:51;>TRINITY_DN255_c0_g1_i1:False:1014;TTTTTTTTTTTTTATGCCAAATATAAATTTATTTTCAAGTTTAAATACATTTTAATTAACTTGTTTTCTAATTTGTTTTGCATTTTTTTGCGAACATAAGTAAATACAGATTTCTTTACTCGGAAACGAATATTGGTTTCCCGACAGAATTTTCTTTGATCCATTCCATGAATGGCCCCACTGCAGTCAGTACACTGAGGGACTTGGCGCACTGGTCTATTATGTAAGACGAAATTCCTACCTGTATCTGCTTGTCAGAACGAGTAATAAAGTTTGGTCCTCCAGAGTCGCCAGAACAAACGCCTTTTCCCTTGGTAGAAAT…	100.000	299	1.0;4.24912;17.7342;34.0609;tr|A0A6P8J349|A0A6P8J349_ACTTE	310; chymotrypsinogen B-like OS=Actinia tenebrosa OX=6105 GN=LOC116308151 PE=4 SV=1;27.459	244	7.61e-19;tr|A0A1I8PAF0|A0A1I8PAF0_STOCA	280; Peptidase S1 domain-containing protein OS=Stomoxys calcitrans OX=35570 GN=106083261 PE=3 SV=1;32.453	265	2.43e-26;Transcriptome;Insolution_Sp2Male	TRINITY_DN9345_c0_g2_i1:False:1028	25.357	280	0.9859154929577465;Transcriptome_Sp2Male	TRINITY_DN1891_c0_g1_i2:True:51	100.000	284	1.0;NA;NA;9;250;27331.97956;NA;NA
Cysteine proteinase;Enzyme;Unspecific;Signal Peptide	CS pos: 20-21. Pr: 0.9827	0.9827;Stop codon present;58	Digestion Sp2;52	185.13;NA;23	104.01;NA;>TRINITY_DN30707_c0_g1_i1:True:305;>TRINITY_DN42599_c0_g1_i1:False:1196;CTTATTTATAATTCTGACGTTCAGTTTGATTTAGGAGCTAAGGTTGTAGTTCTCTGTGCTGCCGCTAGGAGTATGTTTCAAAATTGCCCAGTCATGTCTCCTATCGTTTTCATTCTCAGGTGATTGAATGACGTCACTGCTCAGCTGCGCACCAATCAAGAAGCATTCAACCTAAGGACTTCCTCCTGTCTGTTGGCTAGCGAAATTAGTCATATGATATATAGGTTTACGCGTATAAAGCAGGAGCCTCGTTCGGATTGCTTCGAAGAATATTATAAGTGGCCATTGTTATTGATCGTTGTTAACAGAGATACTTA…	100.000	345	1.0;530.746;145.761;150.958;NA;NA;NA;tr|A0A2I9LNW7|A0A2I9LNW7_9SCOR	341; Cathepsin L-like cysteine peptidase OS=Centruroides hentzi OX=88313 PE=3 SV=1;73.636	330	0.0;Orbitrapmatches	Transcriptome;Insolution_Sp9Female	TRINITY_DN42599_c0_g1_i1:False:1196	100.000	335	1.0;Transcriptome_Sp9Female	TRINITY_DN42599_c0_g1_i1:False:1196	100.000	335	1.0;GO:0006508: proteolysis (biological_process)| GO:0008234: cysteine-type peptidase activity (molecular_function);Gene3D	Cysteine proteinases	6.2E-120| PANTHER	CATHEPSIN L1	PTHR12411:SF57	3.8E-114| SMART	Inhibitor_I29_2	SM00848	3.1E-20| ProSitePatterns	Eukaryotic thiol (cysteine) proteases histidine active site.	PS00639	-| PANTHER	CYSTEINE PROTEASE FAMILY C1-RELATED	PTHR12411	3.8E-114| Pfam	Cathepsin propeptide inhibitor domain (I29)	PF08246	2.8E-10| SUPERFAMILY	Cysteine proteinases	SSF54001	2.75E-121| PRINTS	Papain cysteine protease (C1) family signature	PR00705	4.5E-11| PRINTS	Papain cysteine protease (C1) family signature	PR00705	4.5E-11| PRINTS	Papain cysteine protease (C1) family signature	PR00705	4.5E-11| Pfam
Cysteine proteinase;Enzyme;Unspecific;Signal Peptide	CS pos: 16-17. Pr: 0.9847	0.9847;Stop codon present;88	Digestion Sp2;38	151.83;NA;49	127.86;NA;>TRINITY_DN42210_c0_g1_i1:True:132;>TRINITY_DN1611_c0_g4_i1:True:172;ATGTAAGCCCCACCCAGCCTTCGCGGTGGCTCTTGTATTTGATTTTGTACGCATTTGTTTACTCGTCATTATCGGCTGATTGCTCAACGTATAAAAGAGAATCGTGGGACCTAGTTCTAGTAATTAAGTTAACGGAGCAGGGGATCAGTAAACGCCATGCATACAGTGCTTATATTGTGTGCCCTTTTGGGCTTTGCTTCATCAAGGTTTATGATACCAAATACCATTGATCCATTATCACAGAAGATGATTGATTATATTAATTACATAAACACTACATGGAAGGCTGGAAGGAACTTTGAAGGCATATCTATAGAATA…	100.000	340	1.0;44.259;18.3148;46.8884;NA;NA;NA;tr|A0A224XGA5|A0A224XGA5_9SCOR	335; Putative metalloprotease OS=Megacormus gertschi OX=1843536 PE=3 SV=1;81.982	333	0.0;Orbitrapmatches	Transcriptome;Insolution_Sp9Female	TRINITY_DN1611_c0_g4_i1:True:172	100.000	332	1.0;Transcriptome_Sp9Female	TRINITY_DN1611_c0_g4_i1:True:172	100.000	332	1.0;GO:0006508: proteolysis (biological_process)| GO:0008234: cysteine-type peptidase activity (molecular_function)| GO:0004197: cysteine-type endopeptidase activity (molecular_function)| GO:0050790: regulation of catalytic activity (biological_process);Gene3D	Cysteine proteinases	7.7E-116| ProSitePatterns	Eukaryotic thiol (cysteine) proteases cysteine active site.	PS00139	-| PRINTS	Papain cysteine protease (C1) family signature	PR00705	1.2E-8| PRINTS	Papain cysteine protease (C1) family signature	PR00705	1.2E-8| PRINTS	Papain cysteine protease (C1) family signature	PR00705	1.2E-8| PANTHER	CATHEPSIN B	PTHR12411:SF737	2.0E-108| ProSitePatterns	Eukaryotic thiol (cysteine) proteases asparagine active site.	PS00640	-| SMART	pept_c1	SM00645	1.2E-91| SUPERFAMILY	Cysteine proteinases	SSF54001	1.8E-105| CDD	Peptidase_C1A_CathepsinB	cd02620	8.48874E-146| Pfam
Aspartic-type endopeptidase;Enzyme;Unspecific;Signal Peptide	CS pos: 18-19. Pr: 0.9819	0.9819;Stop codon present;64	Digestion Sp2;55	177.48;NA;32	120.54;NA;>TRINITY_DN38945_c0_g1_i1:False:1368;>TRINITY_DN43545_c0_g1_i1:False:1374;TTTTTTTTTAAACATGGAAAGTTTATTGTGCAAAACTTGGTACATTACATCTTTCTCCGTAAATTTTAACAAAGAATACTATGATGAGTTTCAAAACAACATATATTTCCAAAGTGTTAATAAGTCAATATTGACCATTCTAAGCTACATTTGCAAATCCAACACGAGCATTTCCGTGGTCAAATTCAGTGTAGTAACGACCAATAAAAACATCGCCAAGAATCCATAATGGTCCCATTGGCTTTGGAACATCCAAACCCATAAATCCACTGATACAAATTGTCTGACCAAGCTGTGATACTTTCAGAACATAAT…	99.756	409	1.0;235.869;241.92;271.391;NA;NA;NA;tr|A0A1W7RAB2|A0A1W7RAB2_9SCOR	394; Lysosomal aspartic protease OS=Hadrurus spadix OX=141984 PE=3 SV=1;90.816	392	0.0;Orbitrapmatches	Transcriptome;Insolution_Sp9Female	TRINITY_DN43545_c0_g1_i1:False:1374	100.000	394	1.0;Transcriptome_Sp9Female	TRINITY_DN43545_c0_g1_i1:False:1374	100.000	394	1.0;GO:0004190: aspartic-type endopeptidase activity (molecular_function)| GO:0006508: proteolysis (biological_process);SUPERFAMILY	Acid proteases	1.3E-126| PRINTS	Pepsin (A1) aspartic protease family signature	PR00792	6.6E-29| PRINTS	Pepsin (A1) aspartic protease family signature	PR00792	6.6E-29| PRINTS	Pepsin (A1) aspartic protease family signature	PR00792	6.6E-29| PRINTS	Pepsin (A1) aspartic protease family signature	PR00792	6.6E-29| PANTHER	BETA-SITE APP-CLEAVING ENZYME	ISOFORM A-RELATED	PTHR47966	1.5E-154| Gene3D	Acid Proteases	G3DSA:2.40.70.10	2.0E-82| Gene3D	Acid Proteases	G3DSA:2.40.70.10	1.6E-41| ProSiteProfiles	Peptidase family A1 domain profile.	PS51767	80.184| ProSitePatterns	Eukaryotic and viral aspartyl proteases active site.	PS00141
Putative Phospholipase A2;Enzyme;Unspecific;Signal Peptide	CS pos: 18-19. Pr: 0.9826	0.9826;Stop codon present;79	Digestion Sp2;38	160.18;NA;52	177.76;NA;>TRINITY_DN2179_c0_g1_i1:False:1018;>TRINITY_DN3624_c0_g1_i2:False:1020;TGTTATCTAATTGTACAGACTTTATTGAAGACCAGTATTGCCAGAAATTTGTTTTCTTTTACCGAAATCGATGCTACAATTGATATAATGAAACAGAAAATGATTTATGAGTATATTAGTGCTTAATGTGACAACAGCTGTTTGAGGAGTGGAGATTCGTTCTTTCCTTTGTACATTTTCGAGTCGAAAAACTGGTATTTCATCGTTCCGTTGTAATCTAGTTCGTACTTCTGGCAACTCTCCCTTATTAGGGGTATGCCCCATGACTCTAAGCATTTCTTTATCGGATAATCCTCTTTGAAACACTGCGTTTGTAA…	66.667	279	0.9393939393939394;56.6512;122.59;136.746;sp|Q7M4I6|PA2_BOMPE	137; Phospholipase A2 OS=Bombus pensylvanicus OX=28643 PE=1 SV=1;46.043	139	1.98e-36;tr|A0A1W7RA16|A0A1W7RA16_9SCOR	281; Phospholipase A(2) OS=Hadrurus spadix OX=141984 PE=3 SV=1;79.643	280	7.29e-171;Orbitrapmatches	Transcriptome;Insolution_Sp9Female	TRINITY_DN3624_c0_g1_i2:False:1020	100.000	280	1.0;Transcriptome_Sp9Female	TRINITY_DN3624_c0_g1_i2:False:1020	100.000	280	1.0;GO:0004623: phospholipase A2 activity (molecular_function)| GO:0006644: phospholipid metabolic process (biological_process)| GO:0050482: arachidonic acid secretion (biological_process);PANTHER	RH14732P	1.3E-54| ProSitePatterns	Phospholipase A2 histidine active site.	PS00118	-| PANTHER	RH14732P	PTHR12253	1.3E-54| CDD	PLA2_bee_venom_like	cd04704	2.03044E-47| SUPERFAMILY	Phospholipase A2	PLA2	SSF48619	2.82E-29| Pfam	Phospholipase A2	PF05826	6.3E-36| Gene3D	Phospholipase A2	G3DSA:1.20.90.10	1.8E-47;12;262;30323.93503;NA;NA
Putative Phospholipase A2;Enzyme;Female	Absence;Signal Peptide	CS pos: 18-19. Pr: 0.9848	0.9848;Stop codon present;21	Digestion Sp9;NA;NA;73	192.85;72	293.78;;>TRINITY_DN72_c0_g1_i4:False:859;TTTTTTTTTTTTTTTCGAATTGCACAATTGTTTATTTAGGCACTCCAATCGTCCTTGTTATTAATACAATAAAATAAGGTGTTGTTTAATTTAACAGCTTGCTTTCCATTAGACTATCCATTTATCCACTTTGCCAATCCACTTTCACCGGTGTATGTAGCTACACATTGGTCACTACTCAAAGATCTCTTTGTTGGACAGTTGACGTTGTAACATCCATTTCCGTACAAATCAAAATACACTAATTCGAAACCAGCAACTGCTTTTGATGCCAACTTTCCTTTAATTGCATCCAAGCATTGTTTGAACGCGTCTTCACACTTGCAGTTCATTAATGTGTATTTTCCTTTGTTTGTCA…	50.633	79	0.9634146341463414;;4499.96;1.87352;sp|P0C8L9|PA2_HOFGE	240; Phospholipase A2 OS=Hoffmannihadrurus gertschi OX=380989 PE=2 SV=1;59.244	238	1.17e-99;tr|A0A224XEW7|A0A224XEW7_9SCOR	241; Phospholipase A(2) OS=Megacormus gertschi OX=1843536 PE=3 SV=1;72.385	239	1.49e-129;;Insolution_Sp2Male	TRINITY_DN2179_c0_g1_i1:False:1018	29.817	218	0.9159663865546218;Transcriptome_Sp2Male	TRINITY_DN2179_c0_g1_i1:False:1018	29.817	218	0.9159663865546218;GO:0004623: phospholipase A2 activity (molecular_function)| GO:0006644: phospholipid metabolic process (biological_process)| GO:0050482: arachidonic acid secretion (biological_process);ProSitePatterns	Phospholipase A2 histidine active site.	-| Gene3D	Phospholipase A2	G3DSA:1.20.90.10	1.6E-33| PANTHER	RH14732P	PTHR12253:SF34	6.8E-31| PANTHER	RH14732P	PTHR12253	6.8E-31| Pfam	Phospholipase A2	PF05826	4.6E-27| SUPERFAMILY	Phospholipase A2	PLA2	SSF48619	1.48E-23;12;220;25022.79115;NA;NA
Putative Phospholipase A2;Enzyme;Unspecific;Signal Peptide	CS pos: 19-20. Pr: 0.9685	0.9685;Stop codon present;109	Digestion Sp9;NA;NA;29	98.47;NA;>TRINITY_DN17328_c0_g3_i2:False:1031;>TRINITY_DN813_c0_g1_i5:True:306;TGTACAGGTGATTCTATACATCACAACGAAATAGAAATCTGTACGCTTTGGACGAAACATAATTCCGATATTTATGAGAATAATTCCTTATTAAACGTCAGATTTCTTAAGGTAAATAGTAAAACGCTTTGTAACGGGTTATTCTGTCCTATAATCCTAAAAGTGATAACGGTCCACATAGAAGTTTAGTTTTAATTTGAATATATACGAAATTGTGAAATATATACATGTGGGACGTATTCAGCAAATATTTATTTATGGCTTGGGTCAGGAATACGGAAATTTAATAGCTGCTCCATTAAATGACAGTGCTTCCAGAT…	100.000	193	1.0;4.60837;29.3005;2.98366;sp|P80003|PA2A2_HELSU	143; Acidic phospholipase A2 PA4 OS=Heloderma suspectum OX=8554 PE=1 SV=2;46.875	96	5.72e-31;tr|A0A224X3N3|A0A224X3N3_9SCOR	226; Phospholipase A(2) OS=Megacormus gertschi OX=1843536 PE=3 SV=1;85.308	211	4.48e-137;Transcriptome;Insolution_Sp2Male	TRINITY_DN2179_c0_g1_i1:False:1018	32.222	180	0.8035714285714286;Transcriptome_Sp2Male	TRINITY_DN17328_c0_g3_i2:False:1031	100.000	224	1.0;GO:0004623: phospholipase A2 activity (molecular_function)| GO:0006644: phospholipid metabolic process (biological_process)| GO:0050482: arachidonic acid secretion (biological_process);Pfam	Phospholipase A2	2.2E-35| PANTHER	RH14732P	PTHR12253:SF34	2.0E-54| SUPERFAMILY	Phospholipase A2	PLA2	SSF48619	1.15E-28| Gene3D	Phospholipase A2	G3DSA:1.20.90.10	2.0E-38| PANTHER	RH14732P	PTHR12253	2.0E-54| ProSitePatterns	Phospholipase A2 histidine active site.	PS00118	-| CDD	PLA2_bee_venom_like	cd04704	5.66765E-45;12;205;23472.27973;NA;NA
Putative Glycosyl hydrolase;Enzyme;Unspecific;Signal Peptide	CS pos: 16-17. Pr: 0.9816	0.9816;Stop codon present;35	Digestion Sp2;63	225.26;NA;53	159.01;NA;>TRINITY_DN36_c0_g1_i1:True:114;>TRINITY_DN2_c0_g2_i1:True:73;CTAATAAATTAGCAGTTATAATACACTAAGCAGGTGTGGAGGATCGTTCAGGAAAAATTACAAGGTAAATTCCTTTAAACAGCCTCTGTTCCCAGAATATAAAAATGCTTATAAAACGTACAAATCTCTAGTTCGAAGCCAACCTACACAGCATCAAGCACAATGAAGACCGTTTTCATTCTGATTCTGCTGGCTATTGCCGTCGCCGCATCAGATTTCGGTGATATGAAAGTCGTATGTTATTTCATCAACTGGGCTTGGTACAGGAAAGACAAAGGAAAATATCTACCAGAAAATATTGACCCAACGCTTTGTACCCATATTAAT…	49.105	391	0.9559902200488998;192.597;321.297;6.0522;NA;NA;NA;tr|V5H5Z7|V5H5Z7_IXORI	413; Putative catalytically inactive chitinase-like lectins OS=Ixodes ricinus OX=34613 PE=2 SV=1;50.125	399	1.00e-144;Orbitrapmatches	Transcriptome;Insolution_Sp9Female	TRINITY_DN2_c0_g2_i1:True:73	99.751	401	1.0;Transcriptome_Sp9Female	TRINITY_DN2_c0_g2_i1:True:73	99.751	401	1.0;GO:0005975: carbohydrate metabolic process (biological_process)| GO:0004553: hydrolase activity	hydrolyzing O-glycosyl compounds (molecular_function)| GO:0008061: chitin binding (molecular_function);Pfam	Glycosyl hydrolases family 18	2.6E-96| PANTHER	CHITINASE 10-RELATED	PTHR11177:SF359	8.1E-157| ProSitePatterns	Chitinases family 18 active site.	PS01095	-| Gene3D	-	G3DSA:3.10.50.10	1.7E-147| SUPERFAMILY	Chitinase insertion domain	SSF54556	1.7E-22| CDD	GH18_chitolectin_chitotriosidase	cd02872	0.0| Gene3D	Glycosidases	G3DSA:3.20.20.80	1.7E-147| SMART	2g34	SM00636	8.3E-150| SUPERFAMILY	(Trans)glycosidases	SSF51445	1.22E-99| PANTHER	CHITINASE	PTHR11177
Hydrolase;Enzyme;Unspecific;Signal Peptide	CS pos: 19-20. Pr: 0.9805	0.9805;Stop codon present;172	Digestion Sp2;17	89.99;NA;27	102.68;NA;>TRINITY_DN5238_c0_g1_i1:True:513;>TRINITY_DN666_c0_g3_i1:False:1428;CAAATACAGATCAAACAAACATTATTCTATGAAATTATTATGCTTGGAAGTCCCTGGCCGGAACGAGCAGTGCTGTAGAACATGGAGGTAGCTGTAGAAAGAAGAATGTATGCTAAAGAGAGTTATGATATTCTCGTAGATTAATCTTGATAGTGAATCATATGGTGACAGCTACAGAATTTCATAAAAGCTAAAATGTTAACCGAAACACTGGCTGATATGCCTTGTTTTTATCGTAAAATGGAAAGTACGAATCGATTTCATTCGGCTGAAATATAAAATCACAGTACATTAGAGTGCTATTGTCTGTTGCAGCCGTC…	100.000	386	1.0;25.2317;51.2727;16.5142;NA;NA;NA;tr|A0A1W7RB72|A0A1W7RB72_9SCOR	389; Acid ceramidase OS=Hadrurus spadix OX=141984 PE=3 SV=1;79.381	388	0.0;Orbitrapmatches	Transcriptome;Insolution_Sp9Female	TRINITY_DN666_c0_g3_i1:False:1428	100.000	386	1.0;Transcriptome_Sp9Female	TRINITY_DN666_c0_g3_i1:False:1428	100.000	386	1.0;GO:0005764: lysosome (cellular_component)| GO:0006631: fatty acid metabolic process (biological_process)| GO:0017064: fatty acid amide hydrolase activity (molecular_function);CDD	Ntn_AC_NAAA	7.62907E-113| Pfam	Linear amide C-N hydrolases	choloylglycine hydrolase family	PF02275	3.2E-23| PANTHER	ACID CERAMIDASE	PTHR28583:SF1	9.5E-160| PIRSF	Ceramidase	PIRSF017632	4.3E-125| Pfam	beta subunit of N-acylethanolamine-hydrolyzing acid amidase	PF15508	2.1E-12| PANTHER	ACID AMIDASE	PTHR28583	9.5E-160;6;367;41743.51084;NA;NA
Putative 5'-nucleotidase;Enzyme;Unspecific;Signal Peptide	CS pos: 17-18. Pr: 0.9733	0.9733;Stop codon present;39_1	Digestion Sp2;50	216.47;NA;NA;NA;>TRINITY_DN2238_c0_g5_i1:False:4264;>TRINITY_DN2331_c0_g1_i1:True:0;CAAATTATATGCATTTTAGCAAAGATAAAACAAATTTTGATTAACACAGTGGTTGTCAATGCAACTCTCCATTCTTTAAAAGGTTGGCAACATTATATAACTACTTGTCAACAAATTCTTTAGTGCCAGATGGAATTAGAAAAAAAAATACTTTATTGGATAAAATCCTTAATGGTATATTTGTTATTATAGGTATTTATAATTTTGGCTGAAGATGCTTCAGACTATAATTGAAGGAAGCAAGATGTGTAATGGTTGAAAAATCCATTAAGAAGAATTGAAGTTGTATGTCCAGCTAACTCAAGTGTGCCAGTG…	48.529	544	0.9158249158249159;111.095;746.024;27.0746;tr|A0A6P7UVQ2|A0A6P7UVQ2_IXOSC	702; protein 5NUC OS=Ixodes scapularis OX=6945 GN=LOC8051786 PE=3 SV=1;42.514	541	4.72e-152;tr|A0A1W7RA44|A0A1W7RA44_9SCOR	580; 5'-nucleotidase OS=Hadrurus spadix OX=141984 PE=3 SV=1;75.752	565	0.0;Orbitrapmatches	Transcriptome;Insolution_Sp9Female	TRINITY_DN2331_c0_g1_i1:True:0	99.823	565	1.0;Transcriptome_Sp9Female	TRINITY_DN2331_c0_g1_i1:True:0	99.823	565	1.0;GO:0000166: nucleotide binding (molecular_function)| GO:0016788: hydrolase activity	acting on ester bonds (molecular_function)| GO:0046872: metal ion binding (molecular_function)| GO:0009166: nucleotide catabolic process (biological_process)| GO:0016787: hydrolase activity (molecular_function);ProSitePatterns	5'-nucleotidase signature 1.	-| PANTHER	5'-NUCLEOTIDASE-RELATED	PTHR11575	1.7E-193| SUPERFAMILY	5'-nucleotidase (syn. UDP-sugar hydrolase)	C-terminal domain	SSF55816	3.14E-52| PRINTS	Apyrase family signature	PR01607	1.2E-38| PRINTS	Apyrase family signature	PR01607	1.2E-38| PRINTS	Apyrase family signature	PR01607	1.2E-38| PRINTS	Apyrase family signature	PR01607	1.2E-38| PRINTS	Apyrase family signature	PR01607	1.2E-38| PRINTS	Apyrase family signature	PR01607
Hyaluronidase;Enzyme;Unspecific;Signal Peptide	CS pos: 20-21. Pr: 0.7600	0.7600;Stop codon present;46_1	Digestion Sp2;77	198.61;NA;65	159.16;NA;>TRINITY_DN129_c0_g1_i2:True:214;>TRINITY_DN71_c1_g1_i3:False:2845;ACTAAACAAGGCACAGAGTAAATTTTAATGATGCAACATCTTACTTTTACATGGACGCTGTTAAGGCAGCAGACATAACCCCGAACACATTAATACATTTTAACGACCCCTCATTGTAGGCAATATGTGCCAGAGAAACAGATGTGTGACTTTTATAAAAGTTATACGATTCTATATATATATATAGATATTCGCCATTCAGTTTCTTTGATAAACAATGCAACACTTGCTTTTACTATGCATAATTTCCAATTTTGCGTTCGGTATGGTCTATTCCAATTTCGACGTTTTTTGGAACGTACCATCAGATTTATGTTCCATT…	56.140	399	0.9477434679334917;82.1791;119.855;13.2326;sp|P85841|HYAL1_TITSE	386; Hyaluronidase 1 (Fragment) OS=Tityus serrulatus OX=6887 PE=1 SV=2;52.618	382	6.24e-155;tr|A0A1V1WC22|A0A1V1WC22_9SCOR	399; Hyaluronidase OS=Superstitionia donensis OX=311983 PE=3 SV=1;78.086	397	0.0;Orbitrapmatches	Transcriptome;Insolution_Sp9Female	TRINITY_DN71_c1_g1_i7:False:3860	100.000	398	1.0;Transcriptome_Sp9Female	TRINITY_DN71_c1_g1_i3:False:2845	100.000	398	1.0;GO:0004415: hyalurononglucosaminidase activity (molecular_function)| GO:0005975: carbohydrate metabolic process (biological_process)| GO:0006952: defense response (biological_process)| GO:0003824: catalytic activity (molecular_function);PANTHER	HYALURONIDASE	2.6E-112| PRINTS	Bee venom hyaluronidase signature	PR00847	6.6E-7| PRINTS	Bee venom hyaluronidase signature	PR00847	6.6E-7| PRINTS	Bee venom hyaluronidase signature	PR00847	6.6E-7| PRINTS	Bee venom hyaluronidase signature	PR00847	6.6E-7| Pfam	Hyaluronidase	PF01630	1.2E-95| PRINTS	Glycosyl hydrolase family 56 signature	PR00846	1.3E-33| PRINTS	Glycosyl hydrolase family 56 signature	PR00846	1.3E-33| PRINTS	Glycosyl hydrolase family 56 signature	PR00846	1.3E-33| PRINTS
Thiol oxidase;Enzyme;Unspecific;Signal Peptide	CS pos: 20-21. Pr: 0.9820	0.9820;Stop codon present;47	Digestion Sp2;43	198.21;NA;NA;NA;>TRINITY_DN27137_c0_g1_i1:True:407;>TRINITY_DN6289_c0_g1_i1:False:2551;CGTCATTTGAAGAAACGTGTATTGCCTCGTGGCGTTCTGATTTAGTGTGGCCTGCCAATTGAAAACAAACACTACTGATTGTGCAGCAGGTGTGGCTTGCCAATTTTTTATCAAGTTAGCAGAATTGGAGAGTAGATACTTACAAACGTGCCATATATGAACACCTGTTATCAAAGCACATGTTGCTTGTTTTGCGGTACTTTTCCTATTACATATACCACGTTTGCGTTATTAATTGTAGCTGATAACGTTTAACGCTTATTCATGCCACGAGTGGCGCTAGCTGTCGGCTAGTGTTGTCAGTATGGCTCG…	99.844	639	1.0;70.3759;30.3075;10.5755;NA;NA;NA;tr|A0A4Y2D0J0|A0A4Y2D0J0_ARAVE	595; Sulfhydryl oxidase OS=Araneus ventricosus OX=182803 GN=QSOX1 PE=3 SV=1;39.194	546	1.31e-134;Transcriptome;No hits in Other Sex;Transcriptome_Sp9Female	TRINITY_DN6289_c0_g1_i1:False:2551	100.000	623	1.0;GO:0016972: thiol oxidase activity (molecular_function)| GO:0055114: obsolete oxidation-reduction process (biological_process)| GO:0016971: flavin-linked sulfhydryl oxidase activity (molecular_function);Gene3D	-	6.4E-30| ProSiteProfiles	Thioredoxin domain profile.	PS51352	13.051| CDD	PDI_a_QSOX	cd02992	8.75374E-46| Pfam	QSOX Trx-like domain	PF18108	5.9E-6| ProSitePatterns	Thioredoxin family active site.	PS00194	-| ProSiteProfiles	ERV/ALR sulfhydryl oxidase domain profile.	PS51324	24.497| Gene3D	-	G3DSA:1.20.120.310	8.4E-52| PANTHER	QUIESCIN Q6-RELATED SULFHYDRYL OXIDASE	PTHR22897	2.3E-143| SUPERFAMILY	FAD-dependent thiol oxidase	SSF69000	2.88E-25| Gene3D	Glutaredoxin	G3DSA:3.40.30.10	5.6E-9| Gene3D	Glutaredoxin	G3DSA:3.40.30.10	1.8E-34| SUPERFAMILY	Thioredoxin-like	SSF52833	2.03E-23| Pfam
Oxidoreductase;Enzyme;Unspecific;Signal Peptide	CS pos: 21-22. Pr: 0.9853	0.9853;Stop codon present;50	Digestion Sp2;66	196.3;NA;66	159.31;18	91.40;>TRINITY_DN37922_c0_g1_i1:False:1583;>TRINITY_DN39367_c0_g1_i1:False:1492;AATTCTTATATTTTTTTTAATAAATTTTAATTATTTTTTTTTTTTTTTTTTTTTAATTATTTTTTTTTTTTTTTTTTTTTAATTATTTTTTTTTTTTTTTAATTTTGCATCCAGTACATTTATTTACATCCATAATGTACTACAACAGAAATACTATAATCAAAAACGTTTTTACAGCGAAAGGAAGCGAAATACTTTAGACAACTGCGTATTTGTACAGCGCGAGAGAGCATATTTCAAATGTCACAAAACGTTGTCTTGCAAAGCGTATATTAAATAGTGAAAAGAATTATTCATCACAGATTATGGTGCTAAGTTA…	99.712	347	1.0;461.801;212.819;62.1728;NA;NA;NA;tr|A0A1W7RA03|A0A1W7RA03_9SCOR	345; Peptidylglycine monooxygenase OS=Hadrurus spadix OX=141984 PE=4 SV=1;82.609	345	0.0;Orbitrapmatches	Transcriptome;Insolution_Sp9Female	TRINITY_DN39367_c0_g1_i1:False:1492	99.710	345	1.0;Transcriptome_Sp9Female	TRINITY_DN39367_c0_g1_i1:False:1492	99.710	345	1.0;GO:0016715: oxidoreductase activity	acting on paired donors	with incorporation or reduction of molecular oxygen	reduced ascorbate as one donor	and incorporation of one atom of oxygen (molecular_function)| GO:0055114: obsolete oxidation-reduction process (biological_process)| GO:0003824: catalytic activity (molecular_function)| GO:0006518: peptide metabolic process (biological_process)| GO:0016020: membrane (cellular_component)| GO:0004497: monooxygenase activity (molecular_function)| GO:0005507: copper ion binding (molecular_function);P…	PEPTIDYL-GLYCINE ALPHA-AMIDATING MONOOXYGENASE	1.5E-89| ProSitePatterns	Copper type II	ascorbate-dependent monooxygenases signature 2.	PS00085	-| SUPERFAMILY	PHM/PNGase F	SSF49742	6.8E-50| SUPERFAMILY	PHM/PNGase F	SSF49742	1.31E-40| PRINTS	Peptidyl-glycine alpha-amidating monooxygenase signature	PR00790	6.6E-12| PRINTS	Peptidyl-glycine alpha-amidating monooxygenase signature	PR00790	6.6E-12| Pfam	Copper type II ascorbate-dependent monooxygenase	N-terminal domain	PF01082	1.9E-29| Gene3D	-	G3DSA:2.60.120.310
Corticotropin-releasing factor;Other;Female	Expressionlevel;Signal Peptide	CS pos: 23-24. Pr: 0.9839	0.9839;Stop codon present;53_2	Digestion Sp2;52	190.68;72	331.70;32	104.88;50	251.88;>TRINITY_DN4935_c0_g1_i4:True:160;>TRINITY_DN39628_c0_g1_i1:True:19;CGTGCACCTCATCCACATACATCCACATCACGTTACCGAGTGCGACAGTGAGCATGCGCACTGACGTCACACGCCTACGCTGATAGAGCTTGGCGGTCTGTTAAAATCAGCGTGCTCTGTATTGCACCGATCATTGGTTCACTGGACGGGAGTTGTATAGTACGAAAAGTGTGTCTACCCAAGTTATCATCGGAAAACAGAAAAAAGATTCAACTTAAATATGTATCTATGTCTGAAACCATTGCTGTTGATTCTTGTGTCCGTCTTAGTCAGCCCACAAGTAATCTCGTACAGCCTACCGGATTATTCAAAAGGTGTCAACTT…	100.000	202	1.0;1095.72;376.419;2.812;NA;NA;NA;tr|A0A1E1WVM2|A0A1E1WVM2_TITOB	169; CRF domain-containing protein OS=Tityus obscurus OX=1221240 PE=4 SV=1;48.913	184	2.10e-40;Orbitrapmatches	Transcriptome;Insolution_Sp9Female	TRINITY_DN39628_c0_g1_i1:True:19	100.000	182	1.0;Transcriptome_Sp9Female	TRINITY_DN39628_c0_g1_i1:True:19	100.000	182	1.0;GO:0005179: hormone activity (molecular_function)| GO:0005576: extracellular region (cellular_component);Pfam	Corticotropin-releasing factor family	1.2E-11| SMART	clf2	SM00039	3.4E-13;0;159;18247.4037;NA;NA
Acidic phosphatase;Enzyme;Unspecific;Signal Peptide	CS pos: 16-17. Pr: 0.9810	0.9810;Stop codon present;123	Digestion Sp2;31	121.66;NA;NA;NA;>TRINITY_DN1615_c0_g1_i1:False:1702;>TRINITY_DN1764_c0_g1_i1:False:1706;TTTTTTTCCAAACATGCAAAGTCTTTATTTTCTTATAACAAAAAGAAAGTGGCTAGCAGCCACAACAAATTTGATTCCATTTTTACAATCCTTATAACAATAAAAAAGTGGCTTGCAGCCATAACATTTCTGATTTCATTTCTACAATCCCTTACCATACATGATTTCTCAGAAAAATTGGTCGTTCTCTTCTCTACAGTATTGCAAACTGAAGACATAAACTTGATTCACAAATAAAGTGCATGGAACCATCAATGTTTTCGATGATTTTTTTTTTGCTTGGTCCCTCTATCTCCAATCCCCTAACCCTC…	100.000	394	1.0;60.1793;110.831;469.158;sp|Q5BLY5|ACPH1_APIME	389; Venom acid phosphatase Acph-1 OS=Apis mellifera OX=7460 PE=1 SV=1;34.770	348	1.41e-51;tr|A0A1W7RAF6|A0A1W7RAF6_9SCOR	382; Histidine phosphatase OS=Hadrurus spadix OX=141984 PE=4 SV=1;83.551	383	0.0;Transcriptome;No hits in Other Sex;Transcriptome_Sp9Female	TRINITY_DN1764_c0_g1_i1:False:1706	100.000	383	1.0;GO:0003993: acid phosphatase activity (molecular_function);SUPERFAMILY	Phosphoglycerate mutase-like	9.89E-83| PANTHER	ACID PHOSPHATASE-RELATED	PTHR11567	3.0E-84| Gene3D	-	G3DSA:3.40.50.1240	1.5E-99| PANTHER	GH28721P-RELATED	PTHR11567:SF183	3.0E-84| CDD	HP_HAP_like	cd07061	2.57529E-39| ProSitePatterns	Histidine acid phosphatases phosphohistidine signature.	PS00616	-| Pfam	Histidine phosphatase superfamily (branch 2)	PF00328	3.1E-21;4;367;41734.78422;NA;NA
Alkaline phosphatase;Enzyme	2. Enzyme;Unspecific;Signal Peptide	CS pos: 19-20. Pr: 0.8140	0.8140;Stop codon present;187	Digestion Sp9;NA;NA;10	63.84;NA;>TRINITY_DN37905_c0_g1_i1:True:78;>TRINITY_DN10736_c0_g1_i1:True:67;TGATGAAGCAACAATATAACACGTGCAGCCATCGTAGTCGTACGAATATTAGCCGGTTATCAAGTAAGATATTCGTGTTGTCGTAATGTCTTGCGTTTGGCAAGGGCTCATTTTTACCTTCTTTATTACTACAATATTTTCGCATCCGGCTGATCAGCACAAAAACGATTGTCTTATTATTATATTAGTGGATGGTGTGCGATGGGATTATACGAACGACACTAGTTTGGCAGGATTTCAAAATATAGCCAAACACGGTGTGAGAGCCAAATACGTCGACCCAATTTTTCCAGCTAATTCTTATCCAAACTGGTATACCATC…	100.000	446	1.0;34.3655;26.7804;100.418;tr|G1KBD6|G1KBD6_ANOCA	441; Choline-specific glycerophosphodiester phosphodiesterase OS=Anolis carolinensis OX=28377 GN=ENPP6 PE=3 SV=1;36.905	420	2.23e-91;tr|A0A1W7RA20|A0A1W7RA20_9SCOR	450; Choline-specific glycerophosphodiester phosphodiesterase OS=Hadrurus spadix OX=141984 PE=3 SV=1;67.431	436	0.0;Transcriptome;Insolution_Sp2Male	TRINITY_DN3378_c0_g1_i1:True:120	31.000	400	0.9090909090909091;Transcriptome_Sp2Male	TRINITY_DN37905_c0_g1_i1:True:78	100.000	440	1.0;GO:0003824: catalytic activity (molecular_function)| GO:0005886: plasma membrane (cellular_component)| GO:0047390: glycerophosphocholine cholinephosphodiesterase activity (molecular_function);PANTHER	ECTONUCLEOTIDE PYROPHOSPHATASE/PHOSPHODIESTERASE	3.8E-113| CDD	Enpp	cd16018	3.32594E-77| SUPERFAMILY	Alkaline phosphatase-like	SSF53649	1.96E-70| Gene3D	-	G3DSA:3.30.1360.180	3.3E-115| PANTHER	ECTONUCLEOTIDE PYROPHOSPHATASE/PHOSPHODIESTERASE FAMILY MEMBER 6	PTHR10151:SF66	3.8E-113| Pfam	Type I phosphodiesterase / nucleotide pyrophosphatase	PF01663	9.1E-63| Gene3D	Alkaline Phosphatase	G3DSA:3.40.720.10	3.3E-115;5;421;48184.81875;NA;NA
Isomerase;Enzyme;Unspecific;Signal Peptide	CS pos: 20-21. Pr: 0.9871	0.9871;Stop codon present;141	Digestion Sp2;22	108.15;5	30.32;NA;NA;>TRINITY_DN42856_c0_g1_i1:False:989;>TRINITY_DN44652_c0_g1_i1:False:991;TTTTTTTAACCTGTTAAAAAACATGTTTATTCTGCAAGAAAGCAGATTGGAATGGCAATTAGTATATTCTAGTGTAATCATTATAAAAATCTGATATAAAATGTAGAATTACACTTTTTCAATCCTCTACTCACAAACAACAAATATCGTGAGATAAATTGGAATATATTTCTGGAAGTGCTTATGTAATAAGATGTTATCCAAATACTGTAGTGGATGTGGAATTCTGTGGCAATGAATGTATTTTGGACTATTGCTTGTTTTTGCTAACAAATCACAGCACCAAGTTTTATGCACAAATGCTGCACTGCTTAT…	100.000	224	1.0;434.391;316.118;221.13;NA;NA;NA;tr|A0A2L2Y157|A0A2L2Y157_PARTP	219; Peptidyl-prolyl cis-trans isomerase OS=Parasteatoda tepidariorum OX=114398 PE=2 SV=1;78.539	219	1.95e-119;Transcriptome;No hits in Other Sex;Transcriptome_Sp9Female	TRINITY_DN44652_c0_g1_i1:False:991	100.000	219	1.0;GO:0000413: protein peptidyl-prolyl isomerization (biological_process)| GO:0003755: peptidyl-prolyl cis-trans isomerase activity (molecular_function)| GO:0006457: protein folding (biological_process);SUPERFAMILY	Cyclophilin-like	1.46E-70| ProSiteProfiles	Cyclophilin-type peptidyl-prolyl cis-trans isomerase domain profile.	PS50072	44.429| PRINTS	Cyclophilin peptidyl-prolyl cis-trans isomerase signature	PR00153	2.4E-36| PRINTS	Cyclophilin peptidyl-prolyl cis-trans isomerase signature	PR00153	2.4E-36| PRINTS	Cyclophilin peptidyl-prolyl cis-trans isomerase signature	PR00153	2.4E-36| PRINTS	Cyclophilin peptidyl-prolyl cis-trans isomerase signature	PR00153	2.4E-36| PRINTS	Cyclophilin peptidyl-prolyl cis-trans isomerase signature	PR00153	2.4E-36| CDD	cyclophilin_ABH_like	cd01926	8.69368E-102| Gene3D	-	G3DSA:2.40.100.10	5.9E-83| Pfam	Cyclophilin type peptidyl-prolyl cis-trans isomerase/CLD	PF00160	8.5E-49| PANTHER	PEPTIDYL-PROLYL CIS-TRANS ISOMERASE B	PTHR11071:SF477	7.4E-89| PANTHER	PEPTIDYL-PROLYL CIS-TRANS ISOMERASE	PTHR11071
Carboxypeptidase;Enzyme;Unspecific;Signal Peptide	CS pos: 18-19. Pr: 0.5748	0.5748;Stop codon present;158	Digestion Sp2;13	97.82;NA;NA;NA;>TRINITY_DN27718_c0_g1_i1:True:90;>TRINITY_DN58436_c0_g1_i1:False:1479;GCCTCTTTTGCCGATAGTTGTGTCACGTGCTTAATGCAGCTGTTTATAAATGAGTTTAGTCACGTGTCGTGCACTGCACTGAGGTGTTGATTTAAAAAAATGTTGCTTGTAGCAGTTATATTAATTTCCGGCACTGTTACCGGAATATCTGCTGTCTATGGTAAAGAGGCTTGGAGCTATGTAAATGTTCGTCCTGATGCTTATATGTTCTGGTGGCTATATTATGCAGATGTGGGAGAACAGGCTTATTCAAAATATCCTCTTGTTATATGGCTGCAGGGAGGACCTGGAGCATCATCAACTGGGTATGGAA…	100.000	439	1.0;41.2704;37.948;58.6026;sp|C9WMM5|VCP_APIME	468; Venom serine carboxypeptidase OS=Apis mellifera OX=7460 PE=2 SV=1;29.954	434	8.95e-50;tr|A0A1W7RAV1|A0A1W7RAV1_9SCOR	437; Carboxypeptidase OS=Hadrurus spadix OX=141984 PE=3 SV=1;85.321	436	0.0;Transcriptome;No hits in Other Sex;Transcriptome_Sp9Female	TRINITY_DN58436_c0_g1_i1:False:1479	100.000	436	1.0;GO:0004185: serine-type carboxypeptidase activity (molecular_function)| GO:0006508: proteolysis (biological_process);ProSitePatterns	Serine carboxypeptidases	serine active site.	-| Gene3D	-	G3DSA:3.40.50.1820	8.8E-91| PANTHER	CARBOXYPEPTIDASE	PTHR11802:SF345	8.9E-96| PANTHER	SERINE PROTEASE FAMILY S10 SERINE CARBOXYPEPTIDASE	PTHR11802	8.9E-96| SUPERFAMILY	alpha/beta-Hydrolases	SSF53474	1.64E-101| Pfam	Serine carboxypeptidase	PF00450	1.4E-87| PRINTS	Carboxypeptidase C serine protease (S10) family signature	PR00724	3.3E-14| PRINTS	Carboxypeptidase C serine protease (S10) family signature	PR00724	3.3E-14| PRINTS	Carboxypeptidase C serine protease (S10) family signature	PR00724	3.3E-14| PRINTS	Carboxypeptidase C serine protease (S10) family signature	PR00724	3.3E-14;2;418;47107.1106;NA;NA
Superoxide dismutase;Enzyme;Female	Expressionlevel;Signal Peptide	CS pos: 20-21. Pr: 0.9904	0.9904;Stop codon present;167	Digestion Sp2;18	91.89;NA;53	118.61;NA;>TRINITY_DN13298_c0_g1_i1:True:117;>TRINITY_DN117_c0_g1_i3:True:138;TTCCTCTTACATACACGTACAAGTTCCAGTCTGTGTATAATGTGATACGGGAGAAACGGAATTGTTAAAGAGTTACTGGTGGATTGATATTATCCGTTTCGTTGAATCGATCAGTAGTTGCACCACCAATTACCAACAGCTATGAGATCTGCGAGTTTCCTTTCTACCATTTTGTTGGTTTGTGGATTGAGTAGCATTAGTTGTGATTCAGGGAAAAACATGCCGGTAAAAGCTGTGTGTGTTTTGGCAGGAGATGGAACAGTAACCGGAAGTGTTACTTTCACTGAGTCTTCAGATAAGGTGGTTGTTGAAGGAGAAATA…	100.000	186	0.8230088495575221;172.223;385.84;19.8358;NA;NA;NA;tr|A0A1W7R9H9|A0A1W7R9H9_9SCOR	153; Superoxide dismutase [Cu-Zn] OS=Hadrurus spadix OX=141984 PE=3 SV=1;70.779	154	9.49e-69;Orbitrapmatches	Transcriptome;Insolution_Sp9Female	TRINITY_DN117_c0_g1_i5:True:429	100.000	178	1.0;Transcriptome_Sp9Female	TRINITY_DN117_c0_g1_i1:True:138	100.000	178	1.0;GO:0006801: superoxide metabolic process (biological_process)| GO:0046872: metal ion binding (molecular_function)| GO:0004784: superoxide dismutase activity (molecular_function)| GO:0055114: obsolete oxidation-reduction process (biological_process);Pfam	Copper/zinc superoxide dismutase (SODC)	2.4E-49| ProSitePatterns	Copper/Zinc superoxide dismutase signature 1.	PS00087	-| PANTHER	SUPEROXIDE DISMUTASE [CU-ZN]	PTHR10003:SF66	5.3E-67| CDD	Cu-Zn_Superoxide_Dismutase	cd00305	1.3743E-67| SUPERFAMILY	Cu	Zn superoxide dismutase-like	SSF49329	1.7E-58| ProSitePatterns	Copper/Zinc superoxide dismutase signature 2.	PS00332	-| Gene3D	-	G3DSA:2.60.40.200	3.7E-64| ProSiteProfiles	Prokaryotic membrane lipoprotein lipid attachment site profile.	PS51257	5.0| PRINTS	Cu-Zn-superoxide dismutase family signature	PR00068	4.0E-42| PRINTS	Cu-Zn-superoxide dismutase family signature
Superoxide dismutase_variant;Enzyme;Female	Expressionlevel;Signal Peptide	CS pos: 20-21. Pr: 0.9904	0.9904;Stop codon present;167_5	Digestion Sp2;15	91.89;NA;53	118.61;NA;>TRINITY_DN13298_c0_g1_i6:True:117;>TRINITY_DN117_c0_g1_i3:True:138;TTCCTCTTACATACACGTACAAGTTCCAGTCTGTGTATAATGTGATACGGGAGAAACGGAATTGTTAAAGAGTTACTGGTGGATTGATATTATCCGTTTCGTTGAATCGATCAGTAGTTGCACCACCAATTACCAACAGCTATGAGATCTGCGAGTTTCCTTTCTACCATTTTGTTGGTTTGTGGATTGAGTAGCATTAGTTGTGATTCAGGGAAAAACATGCCGGTAAAAGCTGTGTGTGTTTTGGCAGGAGATGGAACAGTAACCGGAAGTGTTACTTTCACTGAGTCTTCAGATAAGGTGGTTGTTGAAGGAGAAATA…	100.000	226	1.0;21.2662;385.84;19.8358;NA;NA;NA;tr|A0A1W7R9H9|A0A1W7R9H9_9SCOR	153; Superoxide dismutase [Cu-Zn] OS=Hadrurus spadix OX=141984 PE=3 SV=1;70.779	154	8.69e-69;Orbitrapmatches	Transcriptome;Insolution_Sp9Female	TRINITY_DN117_c0_g1_i5:True:429	100.000	218	1.0;Transcriptome_Sp9Female	TRINITY_DN117_c0_g1_i1:True:138	100.000	218	1.0;GO:0004784: superoxide dismutase activity (molecular_function)| GO:0055114: obsolete oxidation-reduction process (biological_process)| GO:0006801: superoxide metabolic process (biological_process)| GO:0046872: metal ion binding (molecular_function);PANTHER	SUPEROXIDE DISMUTASE [CU-ZN]	9.2E-67| ProSitePatterns	Copper/Zinc superoxide dismutase signature 1.	PS00087	-| PRINTS	Cu-Zn-superoxide dismutase family signature	PR00068	6.3E-42| PRINTS	Cu-Zn-superoxide dismutase family signature	PR00068	6.3E-42| PRINTS	Cu-Zn-superoxide dismutase family signature	PR00068	6.3E-42| PRINTS	Cu-Zn-superoxide dismutase family signature	PR00068	6.3E-42| CDD	Cu-Zn_Superoxide_Dismutase	cd00305	2.96184E-71| ProSitePatterns	Copper/Zinc superoxide dismutase signature 2.	PS00332	-| Gene3D	-	G3DSA:2.60.40.200	7.3E-64| ProSiteProfiles	Prokaryotic membrane lipoprotein lipid attachment site profile.	PS51257
Lipase;Enzyme;Male	Absence;Signal Peptide	CS pos: 23-24. Pr: 0.9801	0.9801;No Stop codon present;193	Digestion Sp2;15	73.27;NA;NA;NA;>TRINITY_DN18_c0_g1_i5:True:131;;ATTCTTTAAACAGAACAATGCAATAAAACCGAGTTCAAACAGCTCATTTATTTCACATTGACCAGAAAATCCCCGAGTGTTTAGTTAATCTTTTATTTCGTGCAGTTTTAAAAATATTTCAATAATTTTAGACAGTCATTAAGACGGTCATTTTCGGTTTATGGATGCAAGTGGATTGCTCGGTTTCTGTAATAAAATCATTTTATTTTACAACAAACATGTATATTAGAAAGCGCTTAGACTTTCAGGTAGTGCAGGATAAACTGAAATTCAAGGAAATGATTAACATTCGAATGAATGCCATCGCTGTTCTGTTGACTATCGTCAGTTATACTCAAGTGGAATGTGTGT…	46.835	316	0.5652951699463328;27.3261;NA;2.44355;sp|J3RZ81|LIPE_CROAD	498; Putative endothelial lipase OS=Crotalus adamanteus OX=8729 PE=2 SV=1;27.327	333	2.04e-25;tr|A0A1E1WVR7|A0A1E1WVR7_TITOB	481; Putative lipase (Fragment) OS=Tityus obscurus OX=1221240 PE=3 SV=1;34.036	332	1.49e-48;;No hits in Other Sex;Transcriptome_Sp9Female	TRINITY_DN8913_c0_g2_i1:False:692	97.835	231	0.6;NA;NA;15;362;40354.47636;NA;NA
Lipase_variant;Enzyme;Male	Absence;Signal Peptide	CS pos: 23-24. Pr: 0.9801	0.9801;Stop codon present;193_3	Digestion Sp2;11	73.27;NA;NA;NA;>TRINITY_DN18_c0_g1_i9:True:131;;ATTCTTTAAACAGAACAATGCAATAAAACCGAGTTCAAACAGCTCATTTATTTCACATTGACCAGAAAATCCCCGAGTGTTTAGTTAATCTTTTATTTCGTGCAGTTTTAAAAATATTTCAATAATTTTAGACAGTCATTAAGACGGTCATTTTCGGTTTATGGATGCAAGTGGATTGCTCGGTTTCTGTAATAAAATCATTTTATTTTACAACAAACATGTATATTAGAAAGCGCTTAGACTTTCAGGTAGTGCAGGATAAACTGAAATTCAAGGAAATGATTAACATTCGAATGAATGCCATCGCTGTTCTGTTGACTATCGTCAGTTATACTCAAGTGGAATGTGTGT…	43.524	471	0.8425760286225402;779.786;NA;2.44355;sp|J3RZ81|LIPE_CROAD	498; Putative endothelial lipase OS=Crotalus adamanteus OX=8729 PE=2 SV=1;26.667	405	2.34e-27;tr|A0A1E1WVR7|A0A1E1WVR7_TITOB	481; Putative lipase (Fragment) OS=Tityus obscurus OX=1221240 PE=3 SV=1;32.477	428	1.98e-59;;No hits in Other Sex;Transcriptome_Sp9Female	TRINITY_DN8913_c0_g1_i1:False:880	99.621	264	0.4888888888888889;NA;NA;19;517;57992.21788;NA;NA
Lipase_variant;Enzyme;Male	Absence;Signal Peptide	CS pos: 23-24. Pr: 0.9801	0.9801;No Stop codon present;193_4	Digestion Sp2;18	73.27;NA;NA;NA;>TRINITY_DN18_c0_g1_i1:True:257;;ATTCTTTAAACAGAACAATGCAATAAAACCGAGTTCAAACAGCTCATTTATTTCACATTGACCAGAAAATCCCCGAGTGTTTAGTTAATCTTTTATTTCGTGCAGTTTTAAAAATATTTCAATAATTTTAGACAGTCATTAAGACGGTCATTTTCGGTTTATGGATGCAAGTGGATTGCTCGGTTTCTGTAATAAAATCATTTTATTTTACAACAAACATGTATATTAGAAAGCGCTTAGGCTTACAGGTAGTGTAGGATCGACTGAAATTTAAGAAGGAAATGATTAATATTCGAATGAATGCCATCGCTGTTCTGTTGACTATCGTCAGTTATACTCAAGTGGAATGTG…	48.736	277	0.49552772808586765;93.7484;NA;2.44355;sp|J3RZ81|LIPE_CROAD	498; Putative endothelial lipase OS=Crotalus adamanteus OX=8729 PE=2 SV=1;28.571	287	4.34e-25;tr|E0VGW7|E0VGW7_PEDHC	532; Triacylglycerol lipase	pancreatic	putative OS=Pediculus humanus subsp. corporis OX=121224 GN=8240283 PE=3 SV=1;31.208	298	2.43e-44;;No hits in Other Sex;Transcriptome_Sp9Female	TRINITY_DN8913_c0_g2_i1:False:692	96.970	231	0.6794117647058824;GO:0004806: triglyceride lipase activity (molecular_function);PRINTS	Triacylglycerol lipase family signature	4.6E-12| PRINTS	Triacylglycerol lipase family signature	PR00821	4.6E-12| PRINTS	Triacylglycerol lipase family signature	PR00821	4.6E-12| PRINTS	Triacylglycerol lipase family signature	PR00821	4.6E-12| PRINTS	Triacylglycerol lipase family signature	PR00821	4.6E-12| Pfam	Lipase	PF00151	3.2E-53| PANTHER	LIPASE	PTHR11610	1.5E-65| SUPERFAMILY	alpha/beta-Hydrolases	SSF53474	1.92E-46| Gene3D	-	G3DSA:3.40.50.1820	1.5E-74;13;317;35203.09322;NA;NA
Lipase_variant;Enzyme;Male	Absence;Signal Peptide	CS pos: 23-24. Pr: 0.9801	0.9801;No Stop codon present;193_5	Digestion Sp2;15	73.27;NA;NA;NA;>TRINITY_DN18_c0_g1_i11:True:257;;ATTCTTTAAACAGAACAATGCAATAAAACCGAGTTCAAACAGCTCATTTATTTCACATTGACCAGAAAATCCCCGAGTGTTTAGTTAATCTTTTATTTCGTGCAGTTTTAAAAATATTTCAATAATTTTAGACAGTCATTAAGACGGTCATTTTCGGTTTATGGATGCAAGTGGATTGCTCGGTTTCTGTAATAAAATCATTTTATTTTACAACAAACATGTATATTAGAAAGCGCTTAGGCTTACAGGTAGTGTAGGATCGACTGAAATTTAAGAAGGAAATGATTAATATTCGAATGAATGCCATCGCTGTTCTGTTGACTATCGTCAGTTATACTCAAGTGGAATGT…	46.591	352	0.629695885509839;11.9166;NA;2.44355;sp|J3RZ81|LIPE_CROAD	498; Putative endothelial lipase OS=Crotalus adamanteus OX=8729 PE=2 SV=1;26.844	339	1.79e-26;tr|A0A1E1WVR7|A0A1E1WVR7_TITOB	481; Putative lipase (Fragment) OS=Tityus obscurus OX=1221240 PE=3 SV=1;33.604	369	4.82e-56;;No hits in Other Sex;Transcriptome_Sp9Female	TRINITY_DN58076_c0_g1_i1:True:0	55.714	420	1.0144927536231885;GO:0004806: triglyceride lipase activity (molecular_function)| GO:0006629: lipid metabolic process (biological_process)| GO:0052689: carboxylic ester hydrolase activity (molecular_function);Pfam	Lipase	7.9E-57| PANTHER	LIPASE	PTHR11610	1.1E-69| PIRSF	LPL_LIPH	PIRSF000865	5.2E-70| PIRSF	LPL_LIPH	PIRSF000865	7.4| Gene3D	-	G3DSA:3.40.50.1820	6.5E-80| PRINTS	Triacylglycerol lipase family signature	PR00821	4.4E-16| PRINTS	Triacylglycerol lipase family signature	PR00821	4.4E-16| PRINTS	Triacylglycerol lipase family signature	PR00821	4.4E-16| PRINTS	Triacylglycerol lipase family signature	PR00821	4.4E-16| PRINTS	Triacylglycerol lipase family signature	PR00821	4.4E-16| PRINTS	Triacylglycerol lipase family signature	PR00821
Lipase_variant;Enzyme;Male	Absence;Signal Peptide	CS pos: 23-24. Pr: 0.9801	0.9801;No Stop codon present;193_6	Digestion Sp2;14	73.27;NA;NA;NA;>TRINITY_DN18_c0_g1_i10:True:131;;ATTCTTTAAACAGAACAATGCAATAAAACCGAGTTCAAACAGCTCATTTATTTCACATTGACCAGAAAATCCCCGAGTGTTTAGTTAATCTTTTATTTCGTGCAGTTTTAAAAATATTTCAATAATTTTAGACAGTCATTAAGACGGTCATTTTCGGTTTATGGATGCAAGTGGATTGCTCGGTTTCTGTAATAAAATCATTTTATTTTACAACAAACATGTATATTAGAAAGCGCTTAGACTTTCAGGTAGTGCAGGATAAACTGAAATTCAAGGAAATGATTAACATTCGAATGAATGCCATCGCTGTTCTGTTGACTATCGTCAGTTATACTCAAGTGGAATGTGTG…	46.000	350	0.6261180679785331;115.325;NA;2.44355;sp|J3RZ81|LIPE_CROAD	498; Putative endothelial lipase OS=Crotalus adamanteus OX=8729 PE=2 SV=1;27.566	341	2.40e-27;tr|A0A1E1WVR7|A0A1E1WVR7_TITOB	481; Putative lipase (Fragment) OS=Tityus obscurus OX=1221240 PE=3 SV=1;32.520	369	4.18e-51;;No hits in Other Sex;Transcriptome_Sp9Female	TRINITY_DN8913_c0_g2_i1:False:692	96.104	231	0.5579710144927537;NA;NA;15;391;43756.37861;NA;NA
Lipase_variant;Enzyme;Male	Absence;Signal Peptide	CS pos: 23-24. Pr: 0.9802	0.9802;Stop codon present;193_7	Digestion Sp2;11	73.27;NA;NA;NA;>TRINITY_DN18_c0_g1_i4:True:131;;ATTCTTTAAACAGAACAATGCAATAAAACCGAGTTCAAACAGCTCATTTATTTCACATTGACCAGAAAATCCCCGAGTGTTTAGTTAATCTTTTATTTCGTGCAGTTTTAAAAATATTTCAATAATTTTAGACAGTCATTAAGACGGTCATTTTCGGTTTATGGATGCAAGTGGATTGCTCGGTTTCTGTAATAAAATCATTTTATTTTACAACAAACATGTATATTAGAAAGCGCTTAGACTTTCAGGTAGTGCAGGATAAACTGAAATTCAAGGAAATGATTAACATTCGAATGAATGCCATCGCTGTTCTGTTGACTATCGTCAGTTATACTCAAGTGGAATGTGTGT…	42.857	476	0.851520572450805;138.106;NA;2.44355;sp|J3RZ81|LIPE_CROAD	498; Putative endothelial lipase OS=Crotalus adamanteus OX=8729 PE=2 SV=1;25.799	438	7.58e-27;tr|A0A1E1WVR7|A0A1E1WVR7_TITOB	481; Putative lipase (Fragment) OS=Tityus obscurus OX=1221240 PE=3 SV=1;32.921	404	1.14e-57;;No hits in Other Sex;Transcriptome_Sp9Female	TRINITY_DN58076_c0_g1_i1:True:0	50.735	544	1.0149253731343284;NA;NA;19;513;57410.9722;NA;NA
Lipase_variant;Enzyme;Male	Absence;Signal Peptide	CS pos: 23-24. Pr: 0.9801	0.9801;Stop codon present;193_8	Digestion Sp2;11	73.27;NA;NA;NA;>TRINITY_DN18_c0_g1_i3:True:131;;ATTCTTTAAACAGAACAATGCAATAAAACCGAGTTCAAACAGCTCATTTATTTCACATTGACCAGAAAATCCCCGAGTGTTTAGTTAATCTTTTATTTCGTGCAGTTTTAAAAATATTTCAATAATTTTAGACAGTCATTAAGACGGTCATTTTCGGTTTATGGATGCAAGTGGATTGCTCGGTTTCTGTAATAAAATCATTTTATTTTACAACAAACATGTATATTAGAAAGCGCTTAGACTTTCAGGTAGTGCAGGATAAACTGAAATTCAAGGAAATGATTAACATTCGAATGAATGCCATCGCTGTTCTGTTGACTATCGTCAGTTATACTCAAGTGGAATGTGTGT…	42.380	479	0.8568872987477638;99.6536;NA;2.44355;sp|J3RZ81|LIPE_CROAD	498; Putative endothelial lipase OS=Crotalus adamanteus OX=8729 PE=2 SV=1;25.799	438	8.01e-27;tr|A0A1E1WVR7|A0A1E1WVR7_TITOB	481; Putative lipase (Fragment) OS=Tityus obscurus OX=1221240 PE=3 SV=1;32.921	404	1.34e-57;;No hits in Other Sex;Transcriptome_Sp9Female	TRINITY_DN58076_c0_g1_i1:True:0	50.551	544	1.0149253731343284;NA;NA;19;513;57395.93616;NA;NA
Lipase_variant;Enzyme;Male	Absence;Signal Peptide	CS pos: 23-24. Pr: 0.9801	0.9801;Stop codon present;193_9	Digestion Sp2;11	73.27;NA;NA;NA;>TRINITY_DN18_c0_g1_i6:True:131;;ATTCTTTAAACAGAACAATGCAATAAAACCGAGTTCAAACAGCTCATTTATTTCACATTGACCAGAAAATCCCCGAGTGTTTAGTTAATCTTTTATTTCGTGCAGTTTTAAAAATATTTCAATAATTTTAGACAGTCATTAAGACGGTCATTTTCGGTTTATGGATGCAAGTGGATTGCTCGGTTTCTGTAATAAAATCATTTTATTTTACAACAAACATGTATATTAGAAAGCGCTTAGACTTTCAGGTAGTGCAGGATAAACTGAAATTCAAGGAAATGATTAACATTCGAATGAATGCCATCGCTGTTCTGTTGACTATCGTCAGTTATACTCAAGTGGAATGTGTGT…	41.788	481	0.8604651162790697;270.17;NA;2.44355;sp|J3RZ81|LIPE_CROAD	498; Putative endothelial lipase OS=Crotalus adamanteus OX=8729 PE=2 SV=1;25.115	434	2.62e-26;tr|A0A1E1WVR7|A0A1E1WVR7_TITOB	481; Putative lipase (Fragment) OS=Tityus obscurus OX=1221240 PE=3 SV=1;32.178	404	3.94e-54;;No hits in Other Sex;Transcriptome_Sp9Female	TRINITY_DN58076_c0_g1_i1:True:0	49.816	544	1.0149253731343284;NA;NA;19;513;57278.82078;NA;NA
Glycosidase;Enzyme;Female	Absence;Signal Peptide	CS pos: 16-17. Pr: 0.9826	0.9826;Stop codon present;72_1	Digestion Sp9;NA;NA;24	123.95;NA;;>TRINITY_DN603_c0_g1_i1:True:200;TGGAACATGACGTTCTGACGGAGCTGGGTCTGCTTAACGTGGTTCAACAATAATTAACAGTTATGTTCAAAGTTTGAATCGCTCGTCCATTTGGCGGAAAACTATTCATGGAGCTCAGTTCAACAACACACCACTAGAGGGCACTTGGTGTACATCTAGTTTGAAATTGCTGTATTCGACCTTCGTTCTCTACACTATGACGCTCACATAATTATAGTACGTTGAACAGCTTGTCGTCAAGCGAGATGAAACTGTTGTGTGTAATCGGTTGCCTTCTATCATTTTCGGTTGCTCAATATCAACCCAACTGGAAGTCCATCGATAGCAGACCGTTGCCAAAATGGTTCGACGAAGG…	99.356	466	1.0;;54.0339;80.5122;NA;NA;NA;tr|A0A1W7RAH0|A0A1W7RAH0_9SCOR	452; Alpha-L-fucosidase OS=Hadrurus spadix OX=141984 PE=3 SV=1;82.667	450	0.0;;Insolution_Sp2Male	TRINITY_DN209_c0_g1_i1:False:1599	97.339	451	1.0;Transcriptome_Sp2Male	TRINITY_DN209_c0_g1_i1:False:1599	97.339	451	1.0;GO:0004560: alpha-L-fucosidase activity (molecular_function)| GO:0005975: carbohydrate metabolic process (biological_process)| GO:0006004: fucose metabolic process (biological_process);SUPERFAMILY	(Trans)glycosidases	8.84E-111| Gene3D	Glycosidases	G3DSA:3.20.20.80	7.9E-106| PANTHER	TISSUE ALPHA-L-FUCOSIDASE	PTHR10030:SF2	3.4E-195| PRINTS	Glycosyl hydrolase family 29 signature	PR00741	5.0E-65| PRINTS	Glycosyl hydrolase family 29 signature	PR00741	5.0E-65| PRINTS	Glycosyl hydrolase family 29 signature	PR00741	5.0E-65| PRINTS	Glycosyl hydrolase family 29 signature	PR00741	5.0E-65| PRINTS	Glycosyl hydrolase family 29 signature	PR00741	5.0E-65| PRINTS	Glycosyl hydrolase family 29 signature	PR00741	5.0E-65| PRINTS	Glycosyl hydrolase family 29 signature	PR00741	5.0E-65| PIRSF	Alpha-L-fucosidase
Nucleoside diphosphate kinase;Enzyme;Female	Expressionlevel;Signal Peptide	CS pos: 18-19. Pr: 0.6465	0.6465;Stop codon present;184	Digestion Sp9;NA;NA;20	64.79;NA;>TRINITY_DN2253_c0_g2_i2:False:1714;>TRINITY_DN63_c0_g1_i1:False:1367;TTTTTTTTTTTTTTTTTGTTGTCACCATCAACTTTATTAAAAGTTGTAAGCAGTACATGATTCTAACATAAAATGTATACACTTTTAGATAACTTCTGGCCAAGCCACTATAGCCCTAAGACATTTCACAAGTTAGCCAATGTATATGAAAGATTTTCTGGCTTAGCATTATTTTTATACATCTTTGTGTGTCAACAGATGGAAATACAGGTATCTGAAAATTTTTTTTCATTTATTGATATAAAGTCAACCAGGAAGTTTAGAAATTTTAGAGAAACTTGTTAAGTTTTTTCTGAATACCAAGTTTTGACAAGTTTTCT…	100.000	187	1.0;2.95574;382.341;895.598;NA;NA;NA;tr|A0A1W7RA50|A0A1W7RA50_9SCOR	172; Nucleoside diphosphate kinase OS=Hadrurus spadix OX=141984 PE=3 SV=1;95.322	171	7.18e-120;Transcriptome;No hits in Other Sex;Transcriptome_Sp2Male	TRINITY_DN2253_c0_g2_i2:False:1714	100.000	171	1.0;GO:0004550: nucleoside diphosphate kinase activity (molecular_function)| GO:0006165: nucleoside diphosphate phosphorylation (biological_process)| GO:0006183: GTP biosynthetic process (biological_process)| GO:0006228: UTP biosynthetic process (biological_process)| GO:0006241: CTP biosynthetic process (biological_process);PANTHER	NUCLEOSIDE DIPHOSPHATE KINASE	3.1E-73| PRINTS	Nucleoside diphosphate kinase signature	PR01243	6.6E-53| PRINTS	Nucleoside diphosphate kinase signature	PR01243	6.6E-53| PRINTS	Nucleoside diphosphate kinase signature	PR01243	6.6E-53| PRINTS	Nucleoside diphosphate kinase signature	PR01243	6.6E-53| PRINTS	Nucleoside diphosphate kinase signature	PR01243	6.6E-53| PANTHER	NUCLEOSIDE DIPHOSPHATE KINASE	PTHR11349	3.1E-73| SUPERFAMILY	Nucleoside diphosphate kinase	NDK	SSF54919	1.96E-61| Hamap	Nucleoside diphosphate kinase [ndk].	MF_00451	32.82626| PANTHER	NUCLEOSIDE DIPHOSPHATE KINASE	PTHR11349	3.1E-73| Gene3D	-	G3DSA:3.30.70.141	2.4E-64| PANTHER	NUCLEOSIDE DIPHOSPHATE KINASE
CRISP;Other;Unspecific;Signal Peptide	CS pos: 20-21. Pr: 0.9762	0.9762;Stop codon present;28	Digestion Sp2;60	237.36;4	124.19;71	208.07;4	125.20;>TRINITY_DN4115_c0_g1_i4:False:1447;>TRINITY_DN138_c0_g1_i1:False:1447;TTTTTTTTTTTTTCACATGCATCCTTTTATTTATCTATATTAAATAGAAACATTTCTGTTGTTCAGTTACTGTCGATTTCCAGAGACTCACTCATTCACATTTTGCAAGCTCCTCTACTGATTCCCCATGCTTTAACATCCAAGTACTGTGGAGCAGCTCCCTCGTTGACTCGATAATTGAAGGAAACCTCAAACTTCATGGGAGCTTGCATATGTATACCGACAATATGGAACGTAGAACTACCTCGCTGCAATGTGTTTCGACTTTCCTGTGAGCCACTGTATTTAAAGACAACGTCCATCTTAGACCTACTAGCATCT…	99.778	450	1.0;482.148;1611.86;35.7299;sp|W4VS53|CRVP_TRILK	407; CRISP/Allergen/PR-1 OS=Trittame loki OX=1295018 PE=1 SV=1;36.386	415	8.05e-76;tr|A0A224XGF6|A0A224XGF6_9SCOR	438; Putative CAP peptide OS=Megacormus gertschi OX=1843536 PE=4 SV=1;71.005	438	0.0;Orbitrapmatches	Transcriptome;Insolution_Sp9Female	TRINITY_DN138_c0_g1_i2:False:1486	100.000	438	1.0;Transcriptome_Sp9Female	TRINITY_DN138_c0_g1_i2:False:1486	100.000	438	1.0;GO:0005576: extracellular region (cellular_component);CDD	CAP_euk	2.4672E-38| Pfam	Cysteine-rich secretory protein family	PF00188	8.0E-15| PRINTS	Venom allergen 5 signature	PR00838	1.9E-5| PRINTS	Venom allergen 5 signature	PR00838	1.9E-5| PRINTS	Venom allergen 5 signature	PR00838	1.9E-5| ProSitePatterns	CRISP family signature 2.	PS01010	-| PANTHER	CYSTEINE-RICH SECRETORY PROTEIN	PUTATIVE-RELATED	PTHR10334:SF447	1.6E-45| PANTHER	CYSTEINE-RICH SECRETORY PROTEIN-RELATED	PTHR10334	1.6E-45| PRINTS
CRISP;Other;Unspecific;Signal Peptide	CS pos: 24-25. Pr: 0.9811	0.9811;Stop codon present;28_1	Digestion Sp2;60	237.36;4	124.19;71	208.07;4	125.20;>TRINITY_DN4115_c0_g1_i1:False:1462;>TRINITY_DN138_c0_g1_i1:False:1447;TTTTTTTTTTTTTCACATGCATCCTTTTATTTATCTATATTAAATAGAAACATTTCTGTTGTTCAGTTACTGTCGATTTCCAGAGACTCACTCATTCACATTTTGCAAGCTCCTCTACTGATTCCCCATGCTTTAACATCCAAGTACTGTGGAGCAGCTCCCTCGTTGACTCGATAATTGAAGGAAACCTCAAACTTCATGGGAGCTTGCATATGTATACCGACAATATGGAACGTAGAACTACCTCGCTGCAATGTGTTTCGACTTTCCTGTGAGCCACTGTATTTAAAGACAACGTCCATCTTAGACCTACTAGCATCT…	99.105	447	0.9933333333333333;302.373;1611.86;35.7299;sp|W4VS53|CRVP_TRILK	407; CRISP/Allergen/PR-1 OS=Trittame loki OX=1295018 PE=1 SV=1;36.386	415	1.09e-75;tr|A0A224XGF6|A0A224XGF6_9SCOR	438; Putative CAP peptide OS=Megacormus gertschi OX=1843536 PE=4 SV=1;71.005	438	0.0;Orbitrapmatches	Transcriptome;Insolution_Sp9Female	TRINITY_DN138_c0_g1_i2:False:1486	100.000	438	0.9909502262443439;Transcriptome_Sp9Female	TRINITY_DN138_c0_g1_i1:False:1447	100.000	440	0.995475113122172;GO:0005576: extracellular region (cellular_component);CDD	CAP_euk	2.4672E-38| Pfam	Cysteine-rich secretory protein family	PF00188	8.0E-15| PRINTS	Venom allergen 5 signature	PR00838	1.9E-5| PRINTS	Venom allergen 5 signature	PR00838	1.9E-5| PRINTS	Venom allergen 5 signature	PR00838	1.9E-5| ProSitePatterns	CRISP family signature 2.	PS01010	-| PANTHER	CYSTEINE-RICH SECRETORY PROTEIN	PUTATIVE-RELATED	PTHR10334:SF447	1.6E-45| PANTHER	CYSTEINE-RICH SECRETORY PROTEIN-RELATED	PTHR10334	1.6E-45| PRINTS
CRISP;Other;Female	Expressionlevel;Signal Peptide	CS pos: 20-21. Pr: 0.9762	0.9762;Stop codon present;28_3	Digestion Sp2;59	237.36;4	124.19;71	208.07;4	125.20;>TRINITY_DN4115_c0_g1_i2:False:1486;>TRINITY_DN138_c0_g1_i1:False:1447;TTTTTTTTTTTTTCACATGCATCCTTTTATTTATCTATATTAAATAGAAACATTTCTGTTGTTCAGTTACTGTCGATTTCCAGAGACTCACTCATTCACATTTTGCAAGCTCCTCTACTGATTCCCCATGCTTTAACATCCAAGTACTGTGGAGCAGCTCCCTCGTTGACTCGATAATTGAAGGAAACCTCAAACTTCATGGGAGCTTGCATATGTATACCGACAATATGGAACGTAGAACTACCTCGCTGCAATGTGTTTCGACTTTCCTGTGAGCCACTGTATTTAAAGACAACGTCCATCTTAGACCTACTAGCATCT…	100.000	463	1.0;59.5808;1611.86;4.33281;sp|W4VS53|CRVP_TRILK	407; CRISP/Allergen/PR-1 OS=Trittame loki OX=1295018 PE=1 SV=1;36.386	415	1.37e-75;tr|A0A224XGF6|A0A224XGF6_9SCOR	438; Putative CAP peptide OS=Megacormus gertschi OX=1843536 PE=4 SV=1;71.005	438	0.0;Orbitrapmatches	Transcriptome;Insolution_Sp9Female	TRINITY_DN138_c0_g1_i2:False:1486	100.000	438	1.0;Transcriptome_Sp9Female	TRINITY_DN138_c0_g1_i2:False:1486	100.000	438	1.0;NA;NA;16;418;47605.80963;NA;NA
CRISP;Other;Unspecific;Signal Peptide	CS pos: 20-21. Pr: 0.9837	0.9837;Stop codon present;52	Digestion Sp2;53	192.07;NA;72	198.68;4	60.24;>TRINITY_DN42974_c0_g1_i1:True:0;>TRINITY_DN43224_c0_g1_i1:False:1307;GGTTCCTTTTCTTTCCCCGTCTCCACGGTGCGAGCAGCGAAAATGAATTTCCTATTGCTGCTGATTTTGTTCCTGCACGTCTCCATTTACTCCATTTGTGGCCAAGATTGCCCCGAGATTTATTTAAGATTCAGCAAGGACCACACTTACTGCCGTCGTTCGACTTGCCGACCTACCAAAAGTGGAATGACCGAAGAAGATAAGAAAATCATTTTAAAGATGCACAACGATTTCAGAAGCAAAATTGCCACAGGAAAAGAAAAGGAACCCGTGCAACAGCCCCCTGCTGCAAATATGATGCAGATGGAATGGGACGACGAGCT…	53.421	380	0.8207343412526998;700.416;1623.25;4.33281;sp|W4VS53|CRVP_TRILK	407; CRISP/Allergen/PR-1 OS=Trittame loki OX=1295018 PE=1 SV=1;37.589	423	5.97e-80;tr|A0A224X3J9|A0A224X3J9_9SCOR	404; Putative CAP peptide OS=Megacormus gertschi OX=1843536 PE=4 SV=1;80.307	391	0.0;Orbitrapmatches	Transcriptome;Insolution_Sp9Female	TRINITY_DN43224_c0_g1_i1:False:1307	100.000	404	1.0;Transcriptome_Sp9Female	TRINITY_DN43224_c0_g1_i1:False:1307	100.000	404	1.0;GO:0005576: extracellular region (cellular_component);CDD	CAP_euk	3.89975E-41| Pfam	Cysteine-rich secretory protein family	PF00188	3.5E-18| PRINTS	Allergen V5/Tpx-1 family signature	PR00837	9.2E-12| PRINTS	Allergen V5/Tpx-1 family signature	PR00837	9.2E-12| PRINTS	Allergen V5/Tpx-1 family signature	PR00837	9.2E-12| SMART	SCP_3	SM00198	7.0E-46| ProSitePatterns	CRISP family signature 1.	PS01009	-| PRINTS	Venom allergen 5 signature	PR00838	5.7E-16| PRINTS	Venom allergen 5 signature	PR00838
Novel Venom Compound Ei1;Novel;Female	MALDI+Expressionlevel+Confirmed;Signal Peptide	CS pos: 23-24. Pr: 0.8071	0.8071;Stop codon present;234	Digestion Sp2;26	50.72;NA;43	83.16;50	124.46;>TRINITY_DN131_c0_g1_i2:True:247;>TRINITY_DN2280_c0_g2_i1:False:825;TATTAAGCAGATTTTAGTGACAATACTTAAAGCGCCATTATCTAAACTTGCTATTATTTAACAAACTACTGCAACCGAAATCGTAGCTCTTTTGGTAATAAAAGCAGTAAATGTTATCCATTAAGCAGTAAATCGTTTATTTCCCTAAACTCGAAACGCGTTCGATTGGAGAAATATCGATAATAATTGCAAGCAAACGGTATATATTCAGGCATAATATTGCATTCCATAGATTCTATACATCTGATCTCTGACTCGTTTTGTCAAAATGAAGTGTTACCTGGCAGTCCTGGTTCTTCTGTTAGTGTGCGCAGTGTTGCCAGA…	Transcriptome;Insolution_Sp9Female	TRINITY_DN2280_c0_g2_i4:False:831	98.413	63	1.0;Transcriptome_Sp9Female	TRINITY_DN2280_c0_g2_i4:False:831	98.413	63	1.0;NA;NA;4;40;4717.29269;NA;Mass: 4085.0114499999995 (KSPNFCRNKCLKEYIPNNCVGYCERVLKEKEKKE)	PTMs: A	C-C	Mass: 3700.7589399999997 (KSPNFCRNKCLKEYIPNNCVGYCERVLKEKE)	PTMs: C-C
Novel Venom Compound Ei1_variant;Novel;Female	MALDI+Expressionlevel;Signal Peptide	CS pos: 32-33. Pr: 0.9479	0.9479;Stop codon present;234_1	Digestion Sp2;25	50.72;NA;43	83.16;50	124.46;>TRINITY_DN131_c0_g1_i1:True:105;>TRINITY_DN2280_c0_g2_i1:False:825;GGTAAGTCATTTTTATGTCACTGTTTAAATTAATCAGAAGCAAGTTTAGCAATTTTGTTTCGATACATACATCTCCTTTTATAACTGGGAAAAAAAACATTTTAAATGTCATTCCAGACTCGTTTTGTCAAAATGAAGTGTTACCTGGCAGTCCTGGTTCTTCTGTTAGTGTGCGCAGTGTTGCCAGATCAAACTTGCGGTATTGAAAATGGCAGAAAATCTCCCAATTTCTGCAGAAACAAGTGTTTGAAAGAATACATTCCCAATAACTGCGTGGGATACTGTGAGAGAGTGCTCAAAGAGAAAGAGGAGAAAGAGGGCTGA…	Transcriptome;Insolution_Sp9Female	TRINITY_DN2280_c0_g2_i4:False:831	98.611	72	1.0;Transcriptome_Sp9Female	TRINITY_DN2280_c0_g2_i4:False:831	98.611	72	1.0;NA;NA;4;40;4717.29269;NA;Mass: 4085.0114499999995 (KSPNFCRNKCLKEYIPNNCVGYCERVLKEKEKKE)	PTMs: A	C-C	Mass: 3700.7589399999997 (KSPNFCRNKCLKEYIPNNCVGYCERVLKEKE)	PTMs: C-C
Novel Venom Compound Ei1_variant;Novel;Female	MALDI+Expressionlevel;Signal Peptide	CS pos: 23-24. Pr: 0.8071	0.8071;Stop codon present;234_2	Digestion Sp2;24	50.72;NA;43	83.16;50	124.46;>TRINITY_DN131_c0_g1_i3:True:218;>TRINITY_DN2280_c0_g2_i1:False:825;TATTAAGCAGATTTTAGTGACAATACTTAAAGCGCCATTATCTAAACTTGCTATTATTTAACAAACTACCTCAACCGAAATCGTAGCTTTTATGATAATAAAACATGTTATTTATTAAGCAAACTTCTATGGCCCTGGACTCATTCGAGAAACGTCGATAATAATTGCAAGCAAACAGTATATATTCAGGCATTCAGTATAAATATTGCATTCCATAGATTCTCTACAACATCTGCTCTCTGACTCGTTTTGTCAAAATGAAGTGTTACCTGGCAGTCCTGGTTCTTCTGTTAGTGTGCGCAGTGTTGCCAGATCAAACTTGCG…	Transcriptome;Insolution_Sp9Female	TRINITY_DN2280_c0_g2_i4:False:831	98.413	63	1.0;Transcriptome_Sp9Female	TRINITY_DN2280_c0_g2_i4:False:831	98.413	63	1.0;NA;NA;4;40;4717.29269;NA;Mass: 4085.0114499999995 (KSPNFCRNKCLKEYIPNNCVGYCERVLKEKEKKE)	PTMs: A	C-C	Mass: 3700.7589399999997 (KSPNFCRNKCLKEYIPNNCVGYCERVLKEKE)	PTMs: C-C
Novel Venom Compound Ei2;Novel;Male	Absence;Signal Peptide	CS pos: 21-22. Pr: 0.9841	0.9841;Stop codon present;38	Digestion Sp2;75	219.06;18	56.86;NA;NA;>TRINITY_DN193_c0_g1_i6:True:267;;TTTGGGAATTATAATTCAAAGGAAAAAAAGGCTTTTCTGAGGACGGAGCTGGCGAGTTATAAAAGGAAATTAACGAGAATACGAGAAAGCAATAAAATTCAGTACTCGTGGTTCGATACTAAAATCTCTCATACAGCCACGTACTCGCAAGCTGCGATCATAAAATAACGAATAATGGGCTACACTAAAAAGTATAAGAGCGTCTGGTTGACGTGTCTTTTAGCAGACGAGTCAGTGGAATCAAAGGAACTGGAAGAGGAAGCTTGAATGTCAAACCGTTGTATATTAAAAATGAATCATTTTTTCATCCTTGGAATCGCGCTAATTGCGTCTGAAATAAGCAGCGTTTATGG…	29.091	110	0.8396946564885496;3094.54;NA;24.8304;NA;NA;NA;NA;NA;NA;;Insolution_Sp9Female	TRINITY_DN470_c0_g1_i1:True:74	89.394	132	1.0;Transcriptome_Sp9Female	TRINITY_DN470_c0_g1_i1:True:74	89.394	132	1.0;NA;NA;6;111;12914.26242;Mass: 1643.7555099999997 (TDVAGLRALFDDFCT)	PTMs:;NA
Novel Venom Compound Ei3;Novel;Female	MALDI;Signal Peptide	CS pos: 21-22. Pr: 0.9841	0.9841;Stop codon present;40	Digestion Sp2;75	215.14;NA;54	84.58;NA;>TRINITY_DN193_c0_g1_i8:True:267;>TRINITY_DN470_c0_g1_i1:True:74;TTTGGGAATTATAATTCAAAGGAAAAAAAGGCTTTTCTGAGGACGGAGCTGGCGAGTTATAAAAGGAAATTAACGAGAATACGAGAAAGCAATAAAATTCAGTACTCGTGGTTCGATACTAAAATCTCTCATACAGCCACGTACTCGCAAGCTGCGATCATAAAATAACGAATAATGGGCTACACTAAAAAGTATAAGAGCGTCTGGTTGACGTGTCTTTTAGCAGACGAGTCAGTGGAATCAAAGGAACTGGAAGAGGAAGCTTGAATGTCAAACCGTTGTATATTAAAAATGAATCATTTTTTCATCCTTGGAATCGCGCTAA…	30.909	110	0.8396946564885496;270.341;28.9084;24.8304;NA;NA;NA;NA;NA;NA;Orbitrapmatches	Transcriptome;Insolution_Sp9Female	TRINITY_DN470_c0_g1_i1:True:74	98.485	132	1.0;Transcriptome_Sp9Female	TRINITY_DN470_c0_g1_i1:True:74	98.485	132	1.0;NA;NA;6;111;12809.14258;Mass: 1643.7555099999997 (TDVAGLRALFDDFCT)	PTMs:;Mass: 1643.7555099999997 (TDVAGLRALFDDFCT)	PTMs:
Novel Venom Compound Ei4;Novel;Male	Absence;Signal Peptide	CS pos: 21-22. Pr: 0.9832	0.9832;Stop codon present;54	Digestion Sp2;80	190.63;16	69.65;NA;NA;>TRINITY_DN193_c0_g1_i1:True:267;;TTTGGGAATTATAATTCAAAGGAAAAAAAGGCTTTTCTGAGGACGGAGCTGGCGAGTTATAAAAGGAAATTAACGAGAATACGAGAAAGCAATAAAATTCAGTACTCGTGGTTCGATACTAAAATCTCTCATACAGCCACGTACTCGCAAGCTGCGATCATAAAATAACGAATAATGGGCTACACTAAAAAGTATAAGAGCGTCTGGTTGACGTGTCTTTTAGCAGAAGAGTCAGTGGAATCAAAGGAACAGGAAGAGGAAGCTTGAATGTTAAACCATTGTACATTAAAAATGAATCATTTTCCAATCCTTGGAATCGTGCTAATTGCGTCTGAAGTAAGCAGCGTTTATGG…	TRINITY_DN470_c0_g1_i6:True:74	89.394	132	1.0;Transcriptome_Sp9Female	TRINITY_DN470_c0_g1_i6:True:74	89.394	132	1.0;NA;NA;6;111;12934.32902;NA;NA
Novel Venom Compound Ei5;Novel;Male	Expressionlevel;Signal Peptide	CS pos: 22-23. Pr: 0.9675	0.9675;Stop codon present;57	Digestion Sp2;69	186.85;42	104.83;38	80.32;NA;>TRINITY_DN21_c0_g3_i1:False:946;>TRINITY_DN1070_c0_g1_i4:False:550;GTTGATATTACCAGAAATGTTAATGTCAATGCCATTGATTTCAATTATGATTCGAATGATAATTGAGTCCTGTCATGCTCTTGGTGATAGTGGTTATTCTGAAACTGCTTTCGTGTTCCGAAATTTAAATTTGGCAAATTAATGTAGTCTATATCGCGCCCTAGCTAAGTTTGTGGACATTTCTGGCATCAGAGTGAGGTAGGTAATTGCTTATGCGGTCATGCAACCCACATAATGATAGTCAGTCTTAGGCGTTTACGTTATCTCAAGGTCAAGGAAGTTGTTCGTAATGGCGTCGTCAAGCAGGAATTCATTGTTTAAA…	67.227	119	0.9015151515151515;1046.01;6.69375;30.5692;NA;NA;NA;NA;NA;NA;Orbitrapmatches	Transcriptome;Insolution_Sp9Female	TRINITY_DN1070_c0_g1_i4:False:550	99.200	125	1.0;Transcriptome_Sp9Female	TRINITY_DN1070_c0_g1_i5:False:569	99.200	125	1.0;NA;NA;6;103;12253.68177;NA;NA
Novel Venom Compound Ei6;Novel;Male	Expressionlevel;Signal Peptide	CS pos: 22-23. Pr: 0.9843	0.9843;Stop codon present;59	Digestion Sp2;69	183.1;42	125.63;36	96.42;NA;>TRINITY_DN21_c0_g2_i1:False:1681;>TRINITY_DN574_c0_g1_i1:True:16;TTTGTATTCAGCAATGAAACGATTGTTTCCATTCGGAAAATTGTATATTCTTTGCACTAAAGCTTTAAATGTTTTATGGAATGTTTTTAATTTATAACGGTTTTTTACTTCTTGTGGATTTTTTTTATGTACACGTGAAACTTGTTTAGACATAGTTATAAATTAATGTTCTTACAATAGTCTTGTAATACGTTTTGATGATATATTTAGATTTTCCATTTCTTCAATACGCTCCACAACTTTTTCAGTAGTATTTGTTTTCTACTGTTTTATTAAATATTCTAACCAGTGCTGTTATTTCTTAATAATGGCTTTAATTTAGAT…	65.169	89	0.7295081967213115;884.218;7.51987;3.64493;NA;NA;NA;NA;NA;NA;Orbitrapmatches	Transcriptome;Insolution_Sp9Female	TRINITY_DN574_c0_g1_i1:True:16	100.000	148	1.0;Transcriptome_Sp9Female	TRINITY_DN574_c0_g1_i1:True:16	100.000	148	1.0;NA;NA;7;126;14289.15697;NA;NA
Novel Venom Compound Ei7;Novel;Female	Absence;Signal Peptide	CS pos: 24-25. Pr: 0.6758	0.6758;Stop codon present;61	Digestion Sp2;30	178.86;NA;25	154.72;NA;>TRINITY_DN1366_c0_g1_i1:False:2843;>TRINITY_DN18_c1_g1_i8:False:2782;TTTCCTTATACCATGTTTCTTTACTAGACATTCCCAGCTCTTCTCTGTCCCAAACATTTGTTCTCCACTCATTTTCAACAGTTGTTTCTGTTCTTTCTGATGTTTCACCATGATCCCATGCTTCTGTGTTCCATTCTTCAATCCCCCATCTCTCATCAGAAGGGATTTCTGATTTTTCTGAAGTTGGTTGATTTGTCAATTTAGGGAGTTCGGTTCATTAGTCACTTCAGGAAATGTTTTAGTCGTTTCCTCTTTTTCATCATATCTTTCACCATGATCCCATGCTTCTGTGTTCCATTCTTCTATCCCCCATCTCTCA…	Transcriptome;Insolution_Sp9Female	TRINITY_DN18_c1_g1_i8:False:2782	99.086	875	1.003440366972477;Transcriptome_Sp9Female	TRINITY_DN18_c1_g1_i8:False:2782	99.086	875	1.003440366972477;NA;NA;0;848;100652.9055;NA;NA
Novel Venom Compound Ei8;Novel;Male	MALDI+Expressionlevel;Signal Peptide	CS pos: 22-23. Pr: 0.9849	0.9849;Stop codon present;62	Digestion Sp2;74	178.79;10	63.81;NA;NA;>TRINITY_DN21_c0_g3_i4:False:1004;>TRINITY_DN1070_c0_g1_i1:False:569;AGGTTGAAATATAGATAGATAAAAGAACGTAAAGCTTAAAGAAGGTAGATTTCAAGAAGGTGCTGAGTAAGTTTTTAAAAGTGGCGGTAAGCCAAATAAGTTTGGAAACCTCTGAACTAGACAGTTCATTTTACCTCAGAGACAAACATGTTTGTAGCCAACGTGAATTATTTGACCTTTTTTAAACAATGATTGCTGTTTTGAAGTCTTGAAAAACAATCAATTTTTAAAAAATTAGTGATAGCTTCAAAAAATGCCAGTTTTTCTATTAAAGTTTATCTGTCAAAGGTGAATCTTGAACAGCGAGCACGCTTTTGT…	79.832	119	0.9015151515151515;681.806;3.02591;30.5692;NA;NA;NA;NA;NA;NA;Orbitrapmatches	Transcriptome;Insolution_Sp9Female	TRINITY_DN1070_c0_g1_i1:False:569	100.000	125	1.0;Transcriptome_Sp9Female	TRINITY_DN1070_c0_g1_i1:False:569	100.000	125	1.0;NA;NA;6;103;12170.56336;Mass: 1970.8635000000002 (HLNRSVDEAFDFFCDR)	PTMs:;NA
Novel Venom Compound Ei9;Novel;Male	Absence;Signal Peptide	CS pos: 21-22. Pr: 0.9836	0.9836;Stop codon present;63	Digestion Sp2;73	178.55;NA;NA;NA;>TRINITY_DN193_c0_g1_i10:True:267;;TTTGGGAATTATAATTCAAAGGAAAAAAAGGCTTTTCTGAGGACGGAGCTGGCGAGTTATAAAAGGAAATTAACGAGAATACGAGAAAGCAATAAAATTCAGTACTCGTGGTTCGATACTAAAATCTCTCATACAGCCACGTACTCGCAAGCTGCGATCATAAAATAACGAATAATGGGCTACACTAAAAAGTATAAGAGCGTCTGGTTGACGTGTCTTTTAGCAGACGAGTCAGTGGAATCAAAGGAACTGGAAGAGGAAGCTTGAATGTCAAACCGTTGTATATTAAAAATGAATCATTTTTTCATCCTTGGAATCGCGCTAATTGCGTCTGAAATAAGCAGCGTT…	TRINITY_DN470_c0_g1_i6:True:74	93.939	132	1.0;Transcriptome_Sp9Female	TRINITY_DN470_c0_g1_i6:True:74	93.939	132	1.0;NA;NA;6;111;12995.41165;NA;NA
Novel Venom Compound Ei10;Novel;Male	Expressionlevel;Signal Peptide	CS pos: 22-23. Pr: 0.9810	0.9810;Stop codon present;65	Digestion Sp2;47	176.93;46	96.83;36	75.47;NA;>TRINITY_DN2453_c0_g1_i1:False:472;>TRINITY_DN48309_c0_g1_i1:False:346;TTTTTTTTTTTTTCATGTTCATTATTTATTTATTATCCATAATAGCTTTAATACAGGGAAGCAGCAAATCTTTGGAAGAACTTGAGTATAAACTCCAGATTAGCTTTTTTAATTGAATCTTTGCATTCGTTTTGGCATTCCTCTTTATCAGCACTAGGATTTTTGTCTAGTTCAACTCCGCAACTCATTATGCATTTCAAGAGATCGGCAAAGGTCAGATAATCATCACTTATTTCTACTCTTTCAGTATTTTCTCCAGGCAGTATGGCAAGAAGAACTAGAGGTAAGAGCAACATGGCCAAACGTTTCATCTTTCTAT…	Transcriptome;Insolution_Sp9Female	TRINITY_DN48309_c0_g1_i1:False:346	100.000	87	1.0;Transcriptome_Sp9Female	TRINITY_DN48309_c0_g1_i1:False:346	100.000	87	1.0;NA;NA;4;65;7511.6477;NA;NA
Novel Venom Compound Ei11;Novel;Male	Absence;Signal Peptide	CS pos: 21-22. Pr: 0.9829	0.9829;Stop codon present;70_2	Digestion Sp2;73	170.32;NA;NA;NA;>TRINITY_DN53_c0_g2_i5:True:13;;TTTTTTTTTTTAGTTTTCGAGAGTTCAATCAAAAATGATTAATTTCAAGCTAAGTCTTATTCTCGTTTTATTTAGTCTGTGTACTAGCACACTCGAACAAAACGAAACAATAGATTACTTTGAGATGTATTGCCAACAATCTCGTGAGAAGAGGATTAAGATTAATGAGTGTATTTATTCGGAATTGCATCGAGATCATCACAGTGAGCTGTGTAGTGAGGATTCTCCCCACCAGATATCGGACCTTTATTGTCATTCTCGTTGGATTTGTGGTGAAACTGCCTTTGACTGGTTCTTCGATACATTCTGCGAATCTCATCAAATGTGCCGAGAAAATTCCAACAAGAAACG…	41.732	127	0.8523489932885906;50.1354;NA;2.33332;NA;NA;NA;NA;NA;NA;;No hits in Other Sex;Transcriptome_Sp9Female	TRINITY_DN29346_c0_g1_i1:True:1	72.973	148	1.0068027210884354;NA;NA;10;126;15090.9104;NA;NA
Novel Venom Compound Ei12;Novel;Male	Expressionlevel;Signal Peptide	CS pos: 21-22. Pr: 0.6475	0.6475;Stop codon present;71	Digestion Sp2;74	167.75;NA;36	79.58;NA;>TRINITY_DN19853_c0_g1_i2:True:56;>TRINITY_DN14425_c0_g1_i1:True:1;AAATATTCCACCTGTTAGAAACTTTACGACTCTCTTTTATATATATAATGAATTGATGCTTCTGCCACGGTATAAGTAAACAAATCATGATGGCTTCTAATGTAATTACAATATGTGTTTTATTTTTCTCCGCAGTTTCCTTATGTCAACGGCAGATGAACTTTCCCATGCCAAAAAATAATCGTCATATTGACATGATATGTGAAGCATCTTCAGAAATTAGAGATCAGATTATTGAATGTGCGAATGCAGTTTTTCCTCCAGATTTTCTTAAAAAGGTTCACTCTGTAGAAAGCTGCCTGGGTGTTTCCCTACGTGCAATA…	Transcriptome;Insolution_Sp9Female	TRINITY_DN14425_c0_g1_i1:True:1	98.473	131	1.0;Transcriptome_Sp9Female	TRINITY_DN14425_c0_g1_i1:True:1	98.473	131	1.0;NA;NA;6;110;12261.99418;NA;NA
Novel Venom Compound Ei12_variant;Novel;Male	Absence;Signal Peptide	CS pos: 21-22. Pr: 0.6475	0.6475;Stop codon present;71_1	Digestion Sp2;61	167.75;NA;NA;NA;>TRINITY_DN19853_c0_g1_i3:True:56;;AAATATTCCACCTGTTAGAAACTTTACGACTCTCTTTTATATATATAATGAATTGATGCTTCTGCCACGGTATAAGTAAACAAATCATGATGGCTTCTAATGTAATTACAATATGTGTTTTATTTTTCTCCGCAGTTTCCTTATGTCAACGGCAGATGAACTTTCCCATGCCAAAAAATAATCGTCATATTGACATGATATGTGAAGCATCTTCAGAAATTAGAGATCAGATTATTGAATGTGCGAATGCAGTTTTTCCTCCAGATTTTCTTAAAAAGGTTCACTCTGTAGAAAGCTGCCTGGGTGTTTCCCTACGTGCAATAATTGAAGTGAATTGTTTGGGCATTT…	TRINITY_DN14425_c0_g1_i1:True:1	97.638	127	0.79375;Transcriptome_Sp9Female	TRINITY_DN14425_c0_g1_i1:True:1	97.638	127	0.79375;NA;NA;8;139;15681.48724;NA;NA
Novel Venom Compound Ei13;Novel;Male	Absence;Signal Peptide	CS pos: 21-22. Pr: 0.9836	0.9836;Stop codon present;72	Digestion Sp2;65	166.76;18	56.86;NA;NA;>TRINITY_DN193_c0_g1_i3:True:267;;TTTGGGAATTATAATTCAAAGGAAAAAAAGGCTTTTCTGAGGACGGAGCTGGCGAGTTATAAAAGGAAATTAACGAGAATACGAGAAAGCAATAAAATTCAGTACTCGTGGTTCGATACTAAAATCTCTCATACAGCCACGTACTCGCAAGCTGCGATCATAAAATAACGAATAATGGGCTACACTAAAAAGTATAAGAGCGTCTGGTTGACGTGTCTTTTAGCAGACGAGTCAGTGGAATCAAAGGAACTGGAAGAGGAAGCTTGAATGTCAAACCGTTGTATATTAAAAATGAATCATTTTTTCATCCTTGGAATCGCGCTAATTGCGTCTGAAATAAGCAGCGTTTATGG…	TRINITY_DN470_c0_g1_i2:True:74	93.182	132	1.0;Transcriptome_Sp9Female	TRINITY_DN470_c0_g1_i2:True:74	93.182	132	1.0;NA;NA;6;111;12715.2031;NA;NA
Novel Venom Compound Ei14;Novel;Male	Absence;Signal Peptide	CS pos: 19-20. Pr: 0.7981	0.7981;Stop codon present;73	Digestion Sp2;76	166.33;NA;NA;NA;>TRINITY_DN196_c0_g1_i4:False:638;;TTTTTTTTTAATTACTTATTTAGATGCTTTATTTAGTTGACAATTACACGAATTGATTATTTGTTAATATTTTCTTTGCCATAAAGGTATTGTACCAGCTTTTTTATTGTAAGTTATGATCTACATTTGGAAGGAAATACGTTCTTCTTTGAAAGGTTATTTTCCAATTTTGATGTTTCCACTCATCTCAGAGGGAATCCCTTTCATTCAGTATTCTATACGTTATCAGTTTTTTTGTATCCTTATGGATTCAGGGTAATTCAGTTCCGTTATACATTCGTCTACAAAAGGCACATCGATATGTCTATCAAAAGGATAGATGTTTAATTGGCAATTCTTAATTAATTG…	TRINITY_DN5436_c0_g1_i1:True:2	94.624	93	0.6888888888888889;NA;NA;6;116;13634.57729;NA;NA
Novel Venom Compound Ei15;Novel;Male	Absence;Signal Peptide	CS pos: 29-30. Pr: 0.9839	0.9839;Stop codon present;77	Digestion Sp2;65	161.97;20	45.00;NA;NA;>TRINITY_DN193_c0_g1_i5:True:267;;TTTGGGAATTATAATTCAAAGGAAAAAAAGGCTTTTCTGAGGACGGAGCTGGCGAGTTATAAAAGGAAATTAACGAGAATACGAGAAAGCAATAAAATTCAGTACTCGTGGTTCGATACTAAAATCTCTCATACAGCCACGTACTCGCAAGCTGCGATCATAAAATAACGAATAATGGGCTACACTAAAAAGTATAAGAGCGTCTGGTTGACGTGTCTTTTAGCAGAAGAGTCAGTGGAATCAAAGGAACAGGAAGAGGAAGCTTGAATGTTAAACCATTGTACATTAAAAATGAATCATTTTCCAATCCTTGGAATCGTGCTAATTGCGTCTGAAATAAGCAGCGTTTATGG…	25.781	128	0.9770992366412213;49.3812;NA;24.8304;NA;NA;NA;NA;NA;NA;;Insolution_Sp9Female	TRINITY_DN470_c0_g1_i2:True:74	92.424	132	0.9428571428571428;Transcriptome_Sp9Female	TRINITY_DN470_c0_g1_i2:True:74	92.857	140	1.0;NA;NA;6;111;12696.1609;NA;NA
Novel Venom Compound Ei16;Novel;Male	Expressionlevel;Signal Peptide	CS pos: 17-18. Pr: 0.8289	0.8289;Stop codon present;85	Digestion Sp2;75	154.06;9	38.91;43	68.16;NA;>TRINITY_DN7079_c0_g1_i3:False:500;>TRINITY_DN39425_c0_g1_i1:False:495;TTTTTTTTTTTTTTCATGTTAAGAACATTTATTCAAACTGCTTTACAATTCCTTATACAAAGAACTGTACAACATGATGTTGAATACAGTTGCTTGATTTCTTCCAGTTATCCTTGCCTTTCTCCGAAGTATGATATATTGCATCATATTTTAAAGGTGCTTTTTTATGCAGTACCTCCAAACGTCTGAGAAATAGTATCGAGTATTTTCTAATCTGAGATAGCAATACATTCTTTTTGTCTGCAGTTCATGCGAATTATCCGGATCACCACATGCAGCTTCCATTCTCTGGACTAAACTATACATACCGCATTCTTCC…	666; Cysteine-rich secretory protein LCCL domain-containing 1 (Fragment) OS=Ophiophagus hannah OX=8665 GN=CRISPLD1 PE=3 SV=1;33.962	53	0.037;NA;NA;NA;Orbitrapmatches	Transcriptome;Insolution_Sp9Female	TRINITY_DN39425_c0_g1_i1:False:495	100.000	114	1.0;Transcriptome_Sp9Female	TRINITY_DN39425_c0_g1_i1:False:495	100.000	114	1.0;NA;NA;6;97;11552.37238;NA;NA
Novel Venom Compound Ei17;Novel;Male	Absence;Signal Peptide	CS pos: 19-20. Pr: 0.7981	0.7981;Stop codon present;93	Digestion Sp2;76	148.53;NA;NA;NA;>TRINITY_DN196_c0_g1_i3:False:638;;TTTTTTTTTAATTACTTATTTAGATGCTTTATTTAGTTGACAATTACACGAATTGATTATTTGTTAATATTTTCTTTGCCATAAAGGTATTGTACCAGCTTTTTTATTGTAAGTTATGATCTACATTTGGAAGGAAATACGTTCTTCTTTGAAAGGTTATTTTCCAATTTTGATGTTTCCACTCATCTCAGAGGGAATCCCTTTCATTCAGTATTCTATACGTTATCAGTTTTTTTGTATCCTTATGGATTCAGGGTAGTTTAGTTCCCTTATACATTCGTCTACGAAAGGCACATCGATATGTCTATCAAAAGGATAGATGTTTAATTGGCAATTCTTAATTAATTG…	TRINITY_DN5436_c0_g1_i1:True:2	95.699	93	0.6888888888888889;NA;NA;6;116;13689.63072;Mass: 1603.8259899999998 (ELNYPESIRIQKN)	PTMs:;NA
Novel Venom Compound Ei18;Novel;Male	Absence;Signal Peptide	CS pos: 29-30. Pr: 0.9839	0.9839;Stop codon present;94	Digestion Sp2;62	146.93;NA;NA;NA;>TRINITY_DN193_c0_g1_i4:True:267;;TTTGGGAATTATAATTCAAAGGAAAAAAAGGCTTTTCTGAGGACGGAGCTGGCGAGTTATAAAAGGAAATTAACGAGAATACGAGAAAGCAATAAAATTCAGTACTCGTGGTTCGATACTAAAATCTCTCATACAGCCACGTACTCGCAAGCTGCGATCATAAAATAACGAATAATGGGCTACACTAAAAAGTATAAGAGCGTCTGGTTGACGTGTCTTTTAGCAGAAGAGTCAGTGGAATCAAAGGAACAGGAAGAGGAAGCTTGAATGTTAAACCATTGTACATTAAAAATGAATCATTTTCCAATCCTTGGAATCGTGCTAATTGCGTCTGAAATAAGCAGCGTTT…	TRINITY_DN470_c0_g1_i6:True:74	87.879	132	0.9428571428571428;Transcriptome_Sp9Female	TRINITY_DN470_c0_g1_i6:True:74	88.571	140	1.0;NA;NA;6;111;12910.43817;NA;NA
Novel Venom Compound Ei19;Novel;Male	Expressionlevel;Signal Peptide	CS pos: 24-25. Pr: 0.9368	0.9368;Stop codon present;100	Digestion Sp2;44	142.27;50	198.49;11	43.22;21	57.28;>TRINITY_DN6441_c0_g1_i3:False:727;>TRINITY_DN18408_c0_g1_i1:False:706;AACTTTTTTTTTTTTTTTTTTACCTCCTGCAAACCATTTTATTTCAATCTTCCACATTACAACTTATGGGAGTGAAGACATCAAAGACATTACAACGATTCACAGAGAGTGAAAACGCACACATTGTGTGGATTCAATCCAGGTGAACTGAGTAATGTTGGGCATGTATATTTACATTCTTCACATAAAATTGAAGGGTTACGAAAATGCATTCAATATCCTACGGAAAATAAAAATTTCTAACGAGTATCCATCACTCTGCTACAGACGTTTTTGGTAGAGAATTCTTCAGCCATCTCAACTTTGAAGACGTGAGCAAGCC…	100.000	119	1.0;4339.95;11.0165;4.88239;NA;NA;NA;NA;NA;NA;Orbitrapmatches	Transcriptome;Insolution_Sp9Female	TRINITY_DN18408_c0_g1_i1:False:706	100.000	94	1.0;Transcriptome_Sp9Female	TRINITY_DN18408_c0_g1_i2:False:443	100.000	94	1.0;NA;NA;0;70;8362.9548;NA;NA
Novel Venom Compound Ei19_variant;Novel;Male	Absence;Signal Peptide	CS pos: 24-25. Pr: 0.9368	0.9368;Stop codon present;100_2	Digestion Sp2;34	142.27;39	198.49;NA;NA;>TRINITY_DN6441_c0_g1_i2:False:860;;AACTTTTTTTTTTTTTTTTTTACCTCCTGCAAACCATTTTATTTCAATCTTCCACATTACAACTTATGGGAGTGAAGACATCAAAGACATTACAACGATTCACAGAGAGTGAAAACGCACACATTGTGTGGATTCAATCCAGGTGAACTGAGTAATGTTGGGCATGTATATTTACATTCTTCACATAAAATTGAAGGGTTACGAAAATGCATTCAATATCCTACGGAAAATAAAAATTTCTAACGAGTATCCATCACTCTGCTACAGACGTTTTTGGTAGAGAATTCTTCAGCCATCTCAACTTTGAAGACGTGAGCAAGCCAAGTTATTCTTTATCTCAAGTTTTGTCT…	100.000	118	0.9915966386554622;13.2346;NA;4.88239;NA;NA;NA;NA;NA;NA;;Insolution_Sp9Female	TRINITY_DN18408_c0_g1_i1:False:706	100.000	93	0.6992481203007519;Transcriptome_Sp9Female	TRINITY_DN18408_c0_g1_i2:False:443	100.000	93	0.6992481203007519;NA;NA;1;109;12815.02075;NA;NA
Novel Venom Compound Ei20;Novel;Unspecific;Signal Peptide	CS pos: 23-24. Pr: 0.9815	0.9815;Stop codon present;103_3	Digestion Sp2;45	138.65;48	198.38;45	103.89;38	187.24;>TRINITY_DN83_c12_g1_i5:False:424;>TRINITY_DN113_c1_g1_i6:True:284;TTTTTTTTTTTTCTAACGATTATTTATTGCTAATTTTGCTTTCACATTACATTTAATTCTAAAACATTTCAAAGCTATCGAAGCTACAACATAAATTTATTTGGTTCAGATGTACTTTAGGATATTACAATAAACGAAAGCAACACTGTAATGAAAAGCATTTACAAATATAATTCTCAGCCATGTTTCTTAGGATATAAATTACAAGTCTTCAAGCAAAATATTTGGAGTGGAATTGTTTTGCATCTGCTGATACACGAATCATAATCAGCACGTTCTTCAACGCTATTTGCTATTCTGTACTCTTCGTTCTGTTCGCAATACA…	73; Potassium channel toxin kappa-KTx 5.1 OS=Heterometrus laoticus OX=217256 PE=1 SV=1;30.556	72	0.014;NA;NA;NA;Orbitrapmatches	Transcriptome;Insolution_Sp9Female	TRINITY_DN113_c1_g1_i2:True:416	98.551	69	1.0;Transcriptome_Sp9Female	TRINITY_DN113_c1_g1_i2:True:416	98.551	69	1.0;NA;NA;4;46;5405.5995;Mass: 3496.7134900000005 (ADYDSCISRCKTIPLQIFCLKTCNLYPKKH)	PTMs: A	C-C	Mass: 3496.7134900000005 (ADYDSCISRCKTIPLQIFCLKTCNLYPKKH)	PTMs: A	C-C	Mass: 3496.7134900000005 (ADYDSCISRCKTIPLQIFCLKTCNLYPKKH)	PTMs: A	C-C	Mass: 3496.7134900000005 (ADYDSCISRCKTIPLQIFCLKTCNLYPKKH)	PTMs: A	C-C;Mass: 3496.7134900000005 (ADYDSCISRCKTIPLQIFCLKTCNLYPKKH)	PTMs: A	C-C	Mass: 3496.7134900000005 (ADYDSCISRCKTIPLQIFCLKTCNLYPKKH)	PTMs: A	C-C	Mass: 3496.7134900000005 (ADYDSCISRCKTIPLQIFCLKTCNLYPKKH)	PTMs: A	C-C	Mass: 3496.7134900000005 (ADYDSCISRCKTIPLQIFCLKTCNLYPKKH)	PTMs: A	C-C
Novel Venom Compound Ei21;Novel;Male	Absence;Signal Peptide	CS pos: 29-30. Pr: 0.9840	0.9840;Stop codon present;106	Digestion Sp2;46	135.17;NA;NA;NA;>TRINITY_DN193_c0_g1_i2:True:267;;TTTGGGAATTATAATTCAAAGGAAAAAAAGGCTTTTCTGAGGACGGAGCTGGCGAGTTATAAAAGGAAATTAACGAGAATACGAGAAAGCAATAAAATTCAGTACTCGTGGTTCGATACTAAAATCTCTCATACAGCCACGTACTCGCAAGCTGCGATCATAAAATAACGAATAATGGGCTACACTAAAAAGTATAAGAGCGTCTGGTTGACGTGTCTTTTAGCAGAAGAGTCAGTGGAATCAAAGGAACAGGAAGAGGAAGCTTGAATGTTAAACCATTGTACATTAAAAATGAATCATTTTCCAATCCTTGGAATCGTGCTAATTGCGTCTGAAATAAGCAGCGTTT…	26.562	128	0.9770992366412213;938.578;NA;24.8304;NA;NA;NA;NA;NA;NA;;Insolution_Sp9Female	TRINITY_DN470_c0_g1_i2:True:74	88.636	132	0.9428571428571428;Transcriptome_Sp9Female	TRINITY_DN470_c0_g1_i2:True:74	89.286	140	1.0;NA;NA;6;111;12762.33411;NA;NA
Novel Venom Compound Ei22;Novel;Unspecific;Signal Peptide	CS pos: 23-24. Pr: 0.9809	0.9809;Stop codon present;109	Digestion Sp2;45	132.33;48	189.02;45	96.92;38	151.70;>TRINITY_DN83_c12_g1_i5:True:806;>TRINITY_DN113_c1_g1_i4:True:6;TTTTTTTTTTTTCTAACGATTATTTATTGCTAATTTTGCTTTCACATTACATTTAATTCTAAAACATTTCAAAGCTATCGAAGCTACAACATAAATTTATTTGGTTCAGATGTACTTTAGGATATTACAATAAACGAAAGCAACACTGTAATGAAAAGCATTTACAAATATAATTCTCAGCCATGTTTCTTAGGATATAAATTACAAGTCTTCAAGCAAAATATTTGGAGTGGAATTGTTTTGCATCTGCTGATACACGAATCATAATCAGCACGTTCTTCAACGCTATTTGCTATTCTGTACTCTTCGTTCTGTTCGCAATACATTT…	73; Potassium channel toxin kappa-KTx 5.1 OS=Heterometrus laoticus OX=217256 PE=1 SV=1;27.778	72	0.010;NA;NA;NA;Orbitrapmatches	Transcriptome;Insolution_Sp9Female	TRINITY_DN113_c1_g1_i4:True:6	98.551	69	1.0;Transcriptome_Sp9Female	TRINITY_DN113_c1_g1_i4:True:6	98.551	69	1.0;NA;NA;4;46;5313.57328;Mass: 3404.687270000001 (ADYDSCISRCKTVPVQIICLKACNLYPKKH)	PTMs: A	C-C	Mass: 3404.687270000001 (ADYDSCISRCKTVPVQIICLKACNLYPKKH)	PTMs: A	C-C	Mass: 3404.687270000001 (ADYDSCISRCKTVPVQIICLKACNLYPKKH)	PTMs: A	C-C	Mass: 3404.687270000001 (ADYDSCISRCKTVPVQIICLKACNLYPKKH)	PTMs: A	C-C;Mass: 3404.687270000001 (ADYDSCISRCKTVPVQIICLKACNLYPKKH)	PTMs: A	C-C	Mass: 3404.687270000001 (ADYDSCISRCKTVPVQIICLKACNLYPKKH)	PTMs: A	C-C	Mass: 3404.687270000001 (ADYDSCISRCKTVPVQIICLKACNLYPKKH)	PTMs: A	C-C	Mass: 3404.687270000001 (ADYDSCISRCKTVPVQIICLKACNLYPKKH)	PTMs: A	C-C
Novel Venom Compound Ei23;Novel;Male	Absence;Signal Peptide	CS pos: 23-24. Pr: 0.9850	0.9850;Stop codon present;117	Digestion Sp2;45	125.39;10	76.24;NA;NA;>TRINITY_DN168_c0_g1_i9:True:140;;CTGATTTATTAGCAAGATAATTTTTTCCACTACTTCATAGTATTCAATTTCGCTTATATGCGCATTAAAGAACGATACTCGACGCTTTTGCTCAGTGACGTATTCAGCATTTGGGCAGAGAGCTATAAAAAGCCCTTTAAAAATCGTTTTCATCTGTTCGTCGTAAACAGCGAGTGGCACATCTCCGAGACAAAATGAAACCAGGGCATGTTATTTTGATATCTGCAGTATATATTTTGCATCTTTGTGGAAACGTATTTTCTCAGATGTCAGATCAAGATATGAAGTATATTTGTCACCTTGACCGGGGACCTTATGATATAGAGAAGATATTATCTTGTGCCCTCGGAAAA…	TRINITY_DN43659_c0_g1_i1:True:74	56.410	156	1.0129870129870129;NA;NA;6;131;15148.37792;NA;NA
Novel Venom Compound Ei24;Novel;Male	Expressionlevel;Signal Peptide	CS pos: 23-24. Pr: 0.7560	0.7560;Stop codon present;120	Digestion Sp2;39	123.57;66	217.86;NA;NA;>TRINITY_DN408_c0_g1_i1:False:315;>TRINITY_DN404_c0_g1_i1:True:27;TTTTTTTTTTTTTTTTTTGCTTTCAAAATTCGATTTTATTTTTAAACAGCTTCAAAGTAAAAGCGTGAGATAGGTGTCACGCATTTTTCAATTTTTCGGATGATCCCCCATAGCACTTATTAGTACACAAAGTGTAAGAAGTGCCATCCAGCTCAGTAGTTTTACACTTTGTTGTGCACTTTTCCTGCTTTTTCATCATTTCCGTGTCCTCTGGCTTCTTTGGCGCGGCATCAGCCTGGAATACCCCTTCGTCCAAGGATAGTAAAAACAAGGCAAAAAACCAAAATGCAAACATCTTCATCTTTATTATTTTCAATTAT…	48.571	70	0.8045977011494253;20701.3;73.3918;12.0093;NA;NA;NA;NA;NA;NA;Transcriptome;No hits in Other Sex;Transcriptome_Sp9Female	TRINITY_DN404_c0_g1_i1:True:27	100.000	72	1.0;NA;NA;4;49;5447.5791;NA;NA
Novel Venom Compound Ei25;Novel;Male	Expressionlevel;Signal Peptide	CS pos: 22-23. Pr: 0.9621	0.9621;Stop codon present;124	Digestion Sp2;40	119.66;NA;NA;NA;>TRINITY_DN42586_c0_g1_i1:True:115;>TRINITY_DN59360_c0_g1_i1:True:89;GTCATACTTCCGGAGTTATCTTTCAAGGATTGGATTCATGTTTAATGTTGATTCGCTCTTTGGACCTCTTAAATGACAAAGCGGTTTCTCCAACAGGCACTTAGCCTATAAATAAATTTCAATACGACCCGTTTCCTCACCATTGGTAATCAGAGCGAAGTTGACAGACGTTAAAAATATGAGTGCACGAAACGTGGTACTTTTGGTTACTGCCTTAATCGTTCTTTGGACGGAAGCAAAATCTTCCAGTCTACCTGTCAACTGGGAAGACAAGAAAGCAATGATAAATTTCTGTTGCTCAGAAAGCTTAAACG…	100.000	168	1.0;161.022;4.31957;23.4055;NA;NA;NA;NA;NA;NA;Transcriptome;No hits in Other Sex;Transcriptome_Sp9Female	TRINITY_DN59360_c0_g1_i1:True:89	100.000	147	1.0;NA;NA;8;125;14748.1197;Mass: 8638.002059999999 (SSLPVNWEDKKAMINFCCSESLNEHNFTTSFKSCFTKKMFEMKNNDIAVALLFIEEECRDQTIAGNESKIEKCVE)	PTMs: C-C;NA
Novel Venom Compound Ei26;Novel;Male	Absence;Signal Peptide	CS pos: 22-23. Pr: 0.9828	0.9828;Stop codon present;136	Digestion Sp2;49	110.81;NA;NA;NA;>TRINITY_DN35_c0_g1_i1:False:330;;TTTTTTTTTTTTTCATTGCGTAAAGTTTATTGAAAATCATAATACAGTTATGATGGTTAGTCACACAGCCTTACCCAGATAAACGGGTTACATAAAGTTACTCAGGAAACCTTATATTGCAGACCTCTAGGCAAAGAACCCTATCGTGAGTATTTTTATAAACTGTTTCACATCTGTAGACACATTCGTTTAAGGGACACAGATCAGCATTCATTCTACCCACGTACTTTGCGCCCTGTTCCCAGCAAAATTTTCCAGGAAGTATGGCAAGGAGGACGAGGGTTAGGAGGAACACAGCTTGAGTTTTCATCTTCCTTGTTTTGTCAGAGCTTTAAATCCAAATTCTTGT…	TRINITY_DN113_c1_g1_i4:True:6	31.343	67	0.9571428571428572;Transcriptome_Sp9Female	TRINITY_DN50553_c0_g1_i1:True:0	100.000	40	0.5714285714285714;NA;NA;5;48;5677.65492;NA;NA
Novel Venom Compound Ei27;Novel;Male	Expressionlevel;Signal Peptide	CS pos: 21-22. Pr: 0.9806	0.9806;Stop codon present;145_3	Digestion Sp2;39	105.07;29	88.44;NA;NA;>TRINITY_DN186_c0_g2_i2:False:321;>TRINITY_DN18789_c0_g1_i1:False:303;TTTTTTTTTTAAATTCCTGTTAGTTTTTATTTCGCCATTTTGTTTTCTGAATTAAAACTTTATGGAATACAATAGATCTTTATTGCGTGAAAAAAATTGGAAAAAGAGTATAGTCCTTGCACTCTTTGCATATGCACCACTTTCTTAGGCATTTTCCCAATCGGCAATCTTTTTTTCTACATTTCAGAAGACACTTTTTGTCTGCGGTACATGAGATAGGTAAATGAAGTGACGTAGAATCTTCACCATCATTAAATTCAATGCAGGAACTAATGATCAGAAGCATTAGGACAAACGCGATTTCCATGATTACTATC…	64; AKTx OS=Hadrurus spadix OX=141984 PE=4 SV=1;34.783	69	8.11e-08;NA;NA;NA;Transcriptome;No hits in Other Sex;Transcriptome_Sp9Female	TRINITY_DN18789_c0_g1_i1:False:303	100.000	75	1.0;NA;SUPERFAMILY	Scorpion toxin-like	4.27E-5;8;54;6356.18129;NA;NA
Novel Venom Compound Ei28;Novel;Male	Expressionlevel;Signal Peptide	CS pos: 18-19. Pr: 0.9791	0.9791;Stop codon present;155	Digestion Sp2;31	100.88;55	131.15;NA;NA;>TRINITY_DN1209_c0_g1_i1:False:301;>TRINITY_DN40990_c0_g1_i1:False:296;TTTTTTTTTTTTTTTCTGCGTTAATATTTATTTAGATTAATCTCATTACAGCAATATTCAGTATTCGCAAAACATAATCCAAATGATAATACAATTTTTCGTTTTTATTTTTTGTCGTCCTCATTAAATAAGTGAGTTACGTAACACTCGGTTATGCATTGTTCAACTTTGGCCTTTTGTTCTTCGAGGTTTGATCTTCTAACGATCTCCCGCTTCACTCTACAACATATTTTTTCAGGCAAAACGGATAGAAGAAACAGAGCAATAAACAACACAGTCAATTTCTTCATCTTTGCTGTTCTTCAAAAGGATTGA…	44.000	50	0.625;6684.11;42.2735;12.2654;NA;NA;NA;NA;NA;NA;Transcriptome;Insolution_Sp9Female	TRINITY_DN113_c1_g1_i2:True:416	36.735	49	0.8032786885245902;Transcriptome_Sp9Female	TRINITY_DN40990_c0_g1_i1:False:296	100.000	61	1.0;NA;NA;4;43;5210.61508;NA;NA
Novel Venom Compound Ei29;Novel;Male	Expressionlevel;Signal Peptide	CS pos: 21-22. Pr: 0.9848	0.9848;Stop codon present;161	Digestion Sp2;53	94.89;NA;20	49.20;NA;>TRINITY_DN158_c0_g1_i1:True:114;>TRINITY_DN28787_c0_g1_i1:False:666;ATTGGACAGTCACCTACGTATTACATTTCGTTGAACGTTTATGACTTAACTGCTGTGCTATAAGTTGCTAACACAATATTATTGCCGCAGTCGAGCCTGTTAGTAGAGTATTAATCAGTCATGAATACATTCCGCTTATTCGTTATCCTAGAGTTATTTTTATTCACGTTTTCGGTATTATCTGAGTACGTTGAACACCATAGGGCAGATGATACAGCTTACGTTAGATTCATTTGTGAGTCTTCCGATGCAACCAAAGATGATATTATTGGTTGCTTTTTTCAAAGCCCACAGGAGTATCTAAAAAGATACGTACATATA…	69.173	133	0.9568345323741008;282.429;15.2936;54.1019;NA;NA;NA;NA;NA;NA;Orbitrapmatches	Transcriptome;Insolution_Sp9Female	TRINITY_DN28787_c0_g1_i1:False:666	99.231	130	1.0;Transcriptome_Sp9Female	TRINITY_DN28787_c0_g1_i1:False:666	99.231	130	1.0;NA;NA;6;109;12800.99746;NA;NA
Novel Venom Compound Ei30;Novel;Male	MALDI;Signal Peptide	CS pos: 23-24. Pr: 0.9766	0.9766;Stop codon present;163_1	Digestion Sp2;30	94.7;72	181.24;30	59.65;68	175.02;>TRINITY_DN1211_c0_g4_i2:True:83;>TRINITY_DN20_c0_g1_i3:False:352;AATATATAAATTCAGCAATCTAGCGAAGCAAAAATATATACAACAAAGACTGTTTCATCAAAGAATAATTTTCTGAAAAGTAAAGGATGAGGCTGTTACCAGTGATATTTCTTTCCTTGCTTATATTGTTGGTCGTTCCAAAAGAGATTTCTTGCCAATGGGACCAAGAAACCGACATCGATAACATTCCTGGGAGTGGAAAAAAACGATCCGTTGACGAGGAACCCGAACGAGACATGCCCGAAGCACCTGACAGGGACGTCTGAAGAATCTTTAATGAAAATCATGAAAAAAAAAAACGTTTTCTCAAGTTACTGTCTAGCACG…	73; Potassium channel toxin kappa-KTx 5.1 OS=Heterometrus laoticus OX=217256 PE=1 SV=1;34.000	50	0.017;NA;NA;NA;Orbitrapmatches	Transcriptome;Insolution_Sp9Female	TRINITY_DN20_c0_g1_i3:False:352	100.000	59	1.0;Transcriptome_Sp9Female	TRINITY_DN20_c0_g1_i3:False:352	100.000	59	1.0;NA;MobiDBLite	consensus disorder prediction	-| MobiDBLite	consensus disorder prediction	mobidb-lite	-;0;36;4153.88242;Mass: 2085.8850700000003 (SVDEEPERDMPEAPDRDV)	PTMs:;Mass: 2085.8850700000003 (SVDEEPERDMPEAPDRDV)	PTMs:
Novel Venom Compound Ei31;Novel;Male	Absence;Signal Peptide	CS pos: 19-20. Pr: 0.9818	0.9818;Stop codon present;174	Digestion Sp2;30	89.1;NA;NA;NA;>TRINITY_DN2191_c0_g2_i1:False:1245;;CGTAATTATAGTGTATCGCATTTGTAGTAAACTTTCGAAATATACGTTTAGAATGTGCGCCCTAGTTTTTAGGACATGTGTCATGTTCCAGCTAGCTGTGCGCCTTCCACCAATGCTGCGTGGGTTTGTATGGTGGCACAACTGCGTCCCAATCTATGTCCGTCCTGCGGAACTCACTTAGTCAGCCGTTCTACCGTAAAGTTAGCGGCTTACTTCTCAATTGTATAGAAGCGAAACGCAGGAGGTTCTTAGCGAGAATAAGTGCTCCCTGATGGACATAGATCAGTGAGGATTTTGTCTGACATTTTTTGGTCCAGTTTAGGATAAGGATGTTAAACTATGTTTCTC…	37.607	117	0.2532467532467532;41.4368;NA;4.23226;NA;NA;NA;NA;NA;NA;;No hits in Other Sex;Transcriptome_Sp9Female	TRINITY_DN13076_c0_g2_i1:True:170	38.542	96	0.9056603773584906;NA;NA;6;87;10161.58025;NA;NA
Novel Venom Compound Ei32;Novel;Male	Absence;Signal Peptide	CS pos: 14-15. Pr: 0.9816	0.9816;Stop codon present;175	Digestion Sp2;37	87.96;NA;NA;NA;>TRINITY_DN745_c0_g1_i6:True:132;;CCGTTGCAATAGTAAATGACGTATCCCGTTTCCAGCATAGATGCGCTGTGATTTTAACCAATCCAGGGTGCGGGTGTTAACCGACAAACGTTATTCCATTAACCTTAGTAAATCTCAGTTTCGCTTACTTAGCATCGTCACAAACCAACTATGTTCGTCTTGCTGGCTACGTTTGTTGGCTTCGCTACTTGCAGTGAATACGCCACTATGAAAACTACTCGTCCTGTTCCAGTAGTTGACGGAAAGTGTCAAATTAAGTACAATACATTAACGCATCCATTTCGTTATTGGTACAATAATAATCTGTGTGAGAGATACATTTGCAGACTCGACTTGAACGGGCGCCCGTA…	97.959	98	1.0;29.1138;NA;2.15121;sp|P0DQC6|TXG3A_ETHRU	121; U-scoloptoxin(16)-Er3a OS=Ethmostigmus rubripes OX=62613 PE=2 SV=1;25.743	101	1.26e-05;NA;NA;NA;;No hits in Other Sex;Transcriptome_Sp9Female	TRINITY_DN7750_c0_g1_i1:False:237	100.000	51	0.45535714285714285;NA;NA;8;98;11450.60725;NA;NA
Novel Venom Compound Ei33;Novel;Male	MALDI+Expressionlevel;Signal Peptide	CS pos: 23-24. Pr: 0.9782	0.9782;Stop codon present;177_1	Digestion Sp2;38	87.27;71	221.05;NA;NA;>TRINITY_DN1211_c0_g1_i2:True:159;>TRINITY_DN20_c0_g1_i2:False:355;TTTTTTTTTTTTTTTTGAGAGTATTGACGACAGACGACTTGATTGGTTGTTTCTTAATAACTCTTGCCCTAACAAAAATATATAAATTCAGCAATCTAGAGAAGAAAGAAGATATACAGCAAAGACTGTTTTGTCGAAGAACATTTTTCTGAAAAGTAAAGGATGAGGCTGTTACCAGTGATATTTCTTTCCTTGCTTATATTGTTGGTCGTTCCAAAAGAGATTTCTTGTCGATTGGAGTATGAATCTTCCGACGACGATGACATTCTTGGAGAAAAACGATCTGCTGAGAAGGATCTTAGAGAAAAACGATCTGCTG…	73; Potassium channel toxin kappa-KTx 5.1 OS=Heterometrus laoticus OX=217256 PE=1 SV=1;33.333	66	0.004;NA;NA;NA;Transcriptome;Insolution_Sp9Female	TRINITY_DN20_c0_g1_i3:False:352	65.957	47	0.734375;Transcriptome_Sp9Female	TRINITY_DN20_c0_g1_i2:False:355	100.000	64	1.0;NA;NA;0;41;5061.34885;Mass: 1755.7376699999995 (RLEYESSDDDDILGE)	PTMs:;NA
Novel Venom Compound Ei34;Novel;Male	Absence;Signal Peptide	CS pos: 18-19. Pr: 0.9829	0.9829;Stop codon present;181_2	Digestion Sp2;32	85.04;NA;NA;NA;>TRINITY_DN755_c0_g1_i2:True:0;;TTTTTTTTTTTTTTCGTTTATGGCTGTTTCAAAAGTCCCTCTTTAAGTGACGTTTCTCATCACATTATGGTATATAAGAAAGAATTGCGTTTTGCCACCTCGTTGAAACGGCATTCCTTATCATCTAGCATGAAATCATATATTTGGGTGATTCTACTGTCGCTGGTGATATCAACTGCGTCAGAGGAAAGTTGCCCTCCAGGTACAAAAGAATTCATATGCGTGGATCAATTAATAACCTATTCCTGTTGTCTACAGAAAGCAGAATCAGCACACCAAGAAACTCTTATCTTTAGCGGACCGGATGGCGTTGAGTATATTCCAATAAAATACGCTGAAGAAGAATCTGAAG…	TRINITY_DN56535_c0_g1_i1:False:411	100.000	79	0.9634146341463414;NA;NA;4;64;7348.38063;NA;NA
Novel Venom Compound Ei35;Novel;Male	Expressionlevel;Signal Peptide	CS pos: 26-27. Pr: 0.6417	0.6417;Stop codon present;184_3	Digestion Sp2;20	82.48;57	185.45;NA;NA;>TRINITY_DN984_c0_g1_i5:False:530;>TRINITY_DN4290_c0_g2_i1:True:11;TTTTTTTTTTTTATGTTTCAATGTCTTTAATGAATCAGAAAGCAAAAATAGAACGTGCAATCAGCATTACATTTAATAGATATTTTTCGACAAAGTTCGATTAACTTATACAAATAAGCTTACTTCTTTGATTGGAAAATTATGTCAGAAGGAACAAAACTACTCGTTCAAACACGTGATACTTTCAAGGTAAATTTTAAATATATTAATTTCTAATAACATTGCAGAAGAAAACTTCATCTGTAGTCTATTAACATTCTCTGGCTCATATCAACGATCCTCATCGGCGTTGCAGTACTTAGAACAGTATACCAAATCT…	TRINITY_DN4290_c0_g2_i1:True:11	100.000	71	1.0;NA;NA;4;45;5248.30345;NA;NA
Novel Venom Compound Ei35_variant;Novel;Male	Absence;Signal Peptide	CS pos: 36-37. Pr: 0.7902	0.7902;Stop codon present;184_5	Digestion Sp2;15	82.48;44	185.45;NA;NA;>TRINITY_DN984_c0_g1_i6:False:605;;TTTTTTTTTTTTATGTTTCAATGTCTTTAATGAATCAGAAAGCAAAAATAGAACGTGCAATCAGCATTACATTTAATAGATATTTTTCGACAAAGTTCGATTAACTTATACAAATAAGCTTACTTCTTTGATTGGAAAATTATGTCAGAAGGAACAAAACTACTCGTTCAAACACGTGATACTTTCAAGGTAAATTTTAAATATATTAATTTCTAATAACATTGCAGAAGAAAACTTCATCTGTAGTCTATTAACATTCTCTGGCTCATATCAACGATCCTCATCGGCGTTGCAGTACTTAGAACAGTATACCAAATCTTTCCCTGCCGCAAAGCAGTCATTATAGCAATC…	72.000	25	0.8620689655172413;13.3576;NA;0.124147;NA;NA;NA;NA;NA;NA;;No hits in Other Sex;Transcriptome_Sp9Female	TRINITY_DN4290_c0_g2_i2:True:35	96.053	76	0.8941176470588236;NA;NA;4;49;5661.53087;NA;NA
Novel Venom Compound Ei36;Novel;Male	Absence;Signal Peptide	CS pos: 18-19. Pr: 0.9815	0.9815;Stop codon present;194	Digestion Sp2;59	73.15;13	42.68;NA;NA;>TRINITY_DN1257_c0_g1_i2:False:299;;TTTTTTTTTTTTTTTTGATTACAAAGATATTTTTATTCGATTACATATCTGGTTCTTCGGCGTTTCTCAATCTTTTAAAAAATCTTATTTTTTATTTTTAAAACAAGTGCAACCAAAACCTCCGATACAGAATCCATACACTTCAAAGGTTTCATACTCGTCCAATAGCTTATCACCGCAATCGATTGTGCAAGTGTTGTCATCACAAGGCACTGGAGTGGAAGCACCCAAGGTTGCCAAGCAGAGAAGCAAAATCACGTAGGTCATATTCATTTTCAGCGCTCTTCGTATGGTTCTTCCTTAAGATTTGATAATCAGAT;MNMTYVILLLCLATLGASTPVPCDDNTCTI…
Novel Venom Compound Ei36_variant;Novel;Male	Absence;Signal Peptide	CS pos: 22-23. Pr: 0.9819	0.9819;Stop codon present;194_1	Digestion Sp2;52	73.15;11	42.68;NA;NA;>TRINITY_DN1257_c0_g1_i1:False:329;;TTTTTTTTTTTTTTTTGATTACAAAGATATTTTTATTCGATTACATATCTGGTTCTTCGGCGTTTCTCAATCTTTTAAAAAATCTTATTTTTTATTTTTAAAACAAGTGCAACCAAAACCTCCGATACAGAATCCATACACTTCAAAGGTTTCATACTCGTCCAATAGCTTATCACCGCAATCGATTGTGCAAGTGTTGTCATCACAAGGCACTGGAGTGGAAGCACCCAAGGTTGCCAAGCAGAGAAGCAAAATCACGTAGGTCATATTCATTTTCCTGTTCATGGAAGAAAAGCGCTCTTCGTATGGTTCTTCCTTAAGATTTGATAATCAGAT;MNRKMNMTYVILLL…
Novel Venom Compound Ei37;Novel;Female	Absence;Signal Peptide	CS pos: 20-21. Pr: 0.9830	0.9830;No Stop codon present;198	Digestion Sp2;14	71.54;NA;41	149.28;NA;>TRINITY_DN856_c1_g1_i2:False:489;>TRINITY_DN86_c0_g1_i1:True:36;GATCTACGCATTTGTTCTCATGAACAATGTCATGAACTTTGCATTTTGTGCATTTGTAGCTTTTGAATGCTTTATGCGTTTCACATACAGACTTCTGTTTTCTGCAATCTTCATTTCCGGGTGGTTTTACAGAAAGACTTTGGATGCAAGGATCTAAGCATACGTTGCCCAAAGCGATTTCATGATCCTGGCATACTATGCATGTGTAGTCTTGATTGTCTTGAATTTCTTGACACACAGAATTGGCTTTTCCACAAACAACATATCCATTTTCTCTATGCTCATTAACTTTTGTTCCGCAAACATCTTCTCCAGCTTTGGCGT…	39.535	86	0.8037383177570093;5.30588;18.9721;7.64434;NA;NA;NA;NA;NA;NA;Orbitrapmatches	Transcriptome;Insolution_Sp9Female	TRINITY_DN86_c0_g1_i6:True:36	100.000	124	1.0;Transcriptome_Sp9Female	TRINITY_DN86_c0_g1_i1:True:36	100.000	124	1.0;NA;SUPERFAMILY	Growth factor receptor domain	1.11E-5;12;104;11596.36088;NA;NA
Novel Venom Compound Ei38;Novel;Male	Absence;Signal Peptide	CS pos: 21-22. Pr: 0.6431	0.6431;Stop codon present;199	Digestion Sp2;22	70.92;NA;NA;NA;>TRINITY_DN12_c0_g3_i2:True:118;;TGCATTTCTCAAAGGACAGCTAATTTTATTACTTGTTTACTGCGCATATATCGCATGCGCATGATAACAGCGCTTGATCGTTTATGTCAGCTACACTTGTACAGGAGACTGCTAATAAGATGTAACTTATATAGTAGAATTAGTATTAGAATACAGATTAGACATGACAAACGTTTATACCTTCAATCTCTTCGTTTTATTTCTTTTGCCAGTTACGGTTTTATGTAATATTTTCAGTCGCCGACATTCCCATTCCGAAGATCAACCTTATATTAAATATATTTGCGAAGGTAGTAGTTGGATTAGAGATGAAATTGCCGACTGTCTTGATACAACCACACGGGAAGAGCG…	31.111	135	0.9712230215827338;3.50098;NA;54.1019;NA;NA;NA;NA;NA;NA;;Insolution_Sp9Female	TRINITY_DN28787_c0_g1_i1:False:666	40.476	84	0.5753424657534246;Transcriptome_Sp9Female	TRINITY_DN3427_c0_g1_i1:True:9	95.205	146	1.0;NA;NA;5;125;14806.36613;NA;NA
Novel Venom Compound Ei38_variant;Novel;Male	Expressionlevel;Signal Peptide	CS pos: 21-22. Pr: 0.9260	0.9260;Stop codon present;199_1	Digestion Sp2;22	70.92;NA;NA;NA;>TRINITY_DN12_c0_g3_i1:True:98;>TRINITY_DN3427_c0_g1_i1:True:9;GTTAATTTTATTGCTTGTTTATTGCACATAAATCTCATGGGTATGATAAAAGCGCTTTGATGGTTTATGCCAGCTACACTTGTTCAGTACACTTATAACGAGATATTTCTTACTGTACAATAATAGTGGAACACAGATTAGACATGACCAACTTCAATACCGTCAGTCTCTTCGTTTTACTTCTTTTGCCAGTTACGGTTTTATGTAATATTTTCAGTCGCCGACATTCCCATTCCGAAGATCAACCTTATATTAAATATATTTGCGAAGGTAGTAGTTGGATTAGAGATGAAATTGCCGACTGTCTTGATACAACCACAC…	30.370	135	0.9712230215827338;1367.02;10.9153;54.1019;NA;NA;NA;NA;NA;NA;Transcriptome;Insolution_Sp9Female	TRINITY_DN28787_c0_g1_i1:False:666	38.824	85	0.5821917808219178;Transcriptome_Sp9Female	TRINITY_DN3427_c0_g1_i1:True:9	98.630	146	1.0;NA;NA;5;125;14806.36613;NA;NA
Novel Venom Compound Ei39;Novel;Female	Expressionlevel;Signal Peptide	CS pos: 19-20. Pr: 0.9589	0.9589;Stop codon present;201_1	Digestion Sp2;11	69.69;NA;36	106.87;NA;>TRINITY_DN400_c0_g1_i2:False:910;>TRINITY_DN223_c0_g1_i1:True:51;TTTTTTCATGTTTTAATGAAGTTTAATTGCAACAAATACAAAGTAATTACATCAGCATAATTGAGAATCAGAATACATTATTTTGAGATTATAATATTAGAGAGAAACCACCAGAACGATGATTATAAATGCAATTAGGTTACATTAAACCGCTGTTTAACATCAATCATCACGAGCAGTGAACAACGATATCGATTATATCTTTACTGGCAGGTCTCTTTACTGTCTTTGCATTCATTAATATACGATGGGGCACAACTTGTCTTATCCAAATTAATATTTTCCAAATAACAATCTTTCCACTTAGCTATATCGTTAGCAGC…	100.000	211	0.8406374501992032;77.3506;328.458;6.61856;NA;NA;NA;NA;NA;NA;Orbitrapmatches	Transcriptome;Insolution_Sp9Female	TRINITY_DN223_c0_g1_i2:True:202	100.000	208	1.0;Transcriptome_Sp9Female	TRINITY_DN223_c0_g1_i2:True:202	100.000	208	1.0;NA;NA;16;189;21560.56391;NA;NA
Novel Venom Compound Ei40;Novel;Male	Absence;Signal Peptide	CS pos: 23-24. Pr: 0.9651	0.9651;Stop codon present;206_1	Digestion Sp2;23	66.69;23	57.37;NA;NA;>TRINITY_DN365_c0_g1_i8:False:372;;TTTTTTTTTTTTTTTTTTTTTGCATTCAAATTCGATTTAATTTCTAAAATGACTACACATCATGTCAGATGAAAGGCGTGAGAAACACGGCTCGCATTTGTTAACCCTTGGAAGTGTCATACCACGCGTCGCAGATCTTAAAACACTGTAAAATTTCATTTTCTTTCCAACGCTCTGTATTATTACACTTTGCTTTGCACTTGTTGTTATCTTTCACCACTTCCTCGTTGGATCTAGTCTGAATTTGCGCTTCAGCTTCAAATACCCCTTCATCCAAGGAAAGTAAAAACAAGGCAAAAAACCAAAATGCAAACATCTTCATCTTAATTATTTTCAAGTATCGTTGGGAAAC…	48.333	60	0.6896551724137931;8989.35;NA;12.0093;NA;NA;NA;NA;NA;NA;;No hits in Other Sex;Transcriptome_Sp9Female	TRINITY_DN404_c0_g2_i1:True:15	97.183	71	1.0;NA;NA;4;48;5707.69699;NA;NA
Novel Venom Compound Ei41;Novel;Male	Absence;Signal Peptide	CS pos: 21-22. Pr: 0.7955	0.7955;Stop codon present;216	Digestion Sp2;11	60.27;NA;NA;NA;>TRINITY_DN12_c0_g2_i1:True:1;;GATTTCTTATTCAGTAGAATTAGTATTGGAACACAAATTAGACATGACCAACTTTTATACCGTTCATCTCTTCATTTTATTTCTTTTGCCAGTTACGGTTTTATCTTTTTTTTTCAGTCGCCATCATTCCGATTCCGATTATGCACCTTATGTTAGATATATTTGCGAAGCTAGTTTTGAGATTAGAAATGCCATTGACGATTGTTTTGATAAAAGAAGCTCACCGGCGTATCGTGAAGTATTCGGGAAAGTTGAAAGATGCTCTGTATTGACGTTACGACAAATAATCGATATAGTATGTGATGATGATATGGATTATCTTCGTTTCAAGGTATCCAATTGCATCCGTGTTC…	100.000	93	1.0;1496.67;NA;1.90149;NA;NA;NA;NA;NA;NA;;Insolution_Sp9Female	TRINITY_DN28787_c0_g1_i1:False:666	34.091	132	0.9850746268656716;Transcriptome_Sp9Female	TRINITY_DN46227_c0_g1_i1:True:0	100.000	123	0.917910447761194;NA;NA;6;113;13192.18614;Mass: 1701.73585 (NAIDDCFDKRSSPAY)	PTMs:;NA
Novel Venom Compound Ei42;Novel;Male	Absence;Signal Peptide	CS pos: 18-19. Pr: 0.9776	0.9776;Stop codon present;217_2	Digestion Sp2;12	60.12;NA;NA;NA;>TRINITY_DN3003_c0_g1_i1:False:552;;CTTGTTTATTGAGATTCGAAAGTTTACAAGAGAGAAACGTTGAACGCCATTATTTCAGGCGTGCTAATTAAGTATACAACTTTACTGAAGCGTGAGAGAATCTCGATGAAGACGTCCACAGAATAGCTCCGAACTGTTGTTAGTCACAATTTAATTCTCCGAAACAGCAGTGAGGATAATAACCTTCTGTTATATTTAATGGACACTCCTCACCGTCTTTAGAAATTCCAATTAAATGGGGGCACTGAAATACAATGACTTGACCCTTCTTTGGGATTTTGCTATCATCAATAGCACAGATCATCGCTTTGCACTTTTCGGTGTCAAACGCTTCACCTCCGTCTTCGA…	100.000	123	1.0;9.33953;NA;8.29218;tr|T1J633|T1J633_STRMM	122; SVWC domain-containing protein OS=Strigamia maritima OX=126957 PE=3 SV=1;27.928	111	0.091;NA;NA;NA;;No hits in Other Sex;Transcriptome_Sp9Female	TRINITY_DN46830_c0_g1_i1:False:259	100.000	86	0.7166666666666667;NA;NA;8;102;11446.37334;NA;NA
Novel Venom Compound Ei43;Novel;Male	Expressionlevel;Signal Peptide	CS pos: 23-24. Pr: 0.9798	0.9798;Stop codon present;219_1	Digestion Sp2;17	58.55;NA;NA;NA;>TRINITY_DN15_c0_g1_i2:False:564;>TRINITY_DN20057_c0_g1_i2:False:525;ATCTTTTTTTTTTTTTTCCATTCTATTTCACTTTTTATTCTTTTTGTAAAAGTACATAAGGTGAATTTTGTTTCGTTGGATGCTCCACGTGCTTTTAGCTGACAACGATAAAATAAAGATGTCCTCAAAACACTAACGACAACCCTTATCTTCACTTGTATCTCTCGTGCGATGCGCATAACATTGTGTCGTTTTCCTTGCAGGGAGATAGTCGGATCAGTTCGTGGTCACGAAATTGAAGGGAATAGCAAACGATTGTCAGGTTATCGGTTGCTAAATCCCCGGTTTTTATAATCCAGTCCATTCCAGAGATCG…	53.521	142	0.9861111111111112;1700;7.80644;2.36714;NA;NA;NA;NA;NA;NA;Transcriptome;No hits in Other Sex;Transcriptome_Sp9Female	TRINITY_DN20057_c0_g1_i2:False:525	100.000	125	1.0;NA;NA;6;102;11696.82723;NA;NA
Novel Venom Compound Ei44;Novel;Male	Expressionlevel;Signal Peptide	CS pos: 18-19. Pr: 0.9840	0.9840;Stop codon present;220	Digestion Sp2;14	58.35;NA;NA;NA;>TRINITY_DN27_c0_g1_i1:False:704;>TRINITY_DN1285_c0_g2_i1:False:641;AGGCACTCTGATAAACTTGTTTATTGTTCAGCTTCAATAGTTTGTGGAGAAACTTAATTACAATAAAAATCAATTTAACTTTGTCAGCTTTATTAACTCAGAATATTAAGAAAATACAATATAGAGTAGTCTATGCTTTATTTTTGTAAACGTCGGTATTATAGAAATTGTACCAAAATCAGTTGCATACATAATATTATTACATACTTAGTTGAACTTGTTACATTTCATGGTTGTATTACAAACGACGCTCTCCCTTTCTTTCAGGAACTGCCACCTCCAATCCAACCAGTTCTATTCGAATGCTTCGTCCTTG…	33.071	127	0.9136690647482014;3725.79;10.1635;54.1019;NA;NA;NA;NA;NA;NA;Transcriptome;Insolution_Sp9Female	TRINITY_DN28787_c0_g1_i1:False:666	36.885	122	0.953125;Transcriptome_Sp9Female	TRINITY_DN1285_c0_g2_i1:False:641	100.000	128	1.0;NA;NA;6;110;13263.33062;NA;NA
Novel Venom Compound Ei45;Novel;Male	Expressionlevel;Signal Peptide	CS pos: 24-25. Pr: 0.9751	0.9751;Stop codon present;230	Digestion Sp2;20	52.07;30	55.71;NA;NA;>TRINITY_DN1614_c0_g1_i1:False:891;>TRINITY_DN55526_c0_g1_i1:True:6;CTTTATTCAAATTTTACAATATACATTATTATTTAATGGAATATAAATAATTACATATTGTTATAATAAACCCTGTCGTTATTAGCCCAGATTTTGTGTAGAAGAAATAACATTAAATACAGGTTTGTTTTATGTGTTCTGTACAGATTGGTATAATTATTCTTTTGTTGCTACTTTCGATATTGGCATTGTTACTTTACAGGTACAGTGGTTTGTTGCTACGTTCGATATTTCTAAATAAAATTAATCTGCTTGCACATATATTTAGGTAGGATGCATTGTAAAAGTATTATTTCTAACTGAAAAATATCGAATCATT…	TRINITY_DN55526_c0_g1_i1:True:6	100.000	63	1.0;NA;NA;2;39;4413.07673;Mass: 1527.77412 (QPVDEFKRQLQTG)	PTMs: A	pQ;NA
Novel Venom Compound Ei46;Novel;Male	Absence;Signal Peptide	CS pos: 23-24. Pr: 0.7969	0.7969;Stop codon present;238	Digestion Sp2;13	48.58;NA;NA;NA;>TRINITY_DN1908_c0_g2_i1:True:413;;ACTGAAATCGGCAATGTAGACTTATATAAGTCAAAACGATAAAACATTTGAATGAAACAAATTTTTGTTGCCTTGTGTAATTATACTAGTTATAATCTGCGCAATCATGTAGAATGAGGTTACGTTAGCTAAAATCGTTTATATAGTAATTTTAAGTAAAACAGAGTTTCTTTCTGCAATTCCAAAGTATTTAATAAATATATTTTATTAAAGTGGATTCCTACAAGCTAATAAACAAAGCATAGACACAACTCTGGTTTGCTAGCAAGGTAGGCTTTGAACATATACTTTTCTCCTATGCCCACTAAGTACTGTTTGTTATTACATTTGCCCAGTTACGTTAATACGT…	TRINITY_DN49220_c0_g1_i1:False:194	98.148	54	0.6206896551724138;NA;NA;4;64;7569.60612;NA;NA
Novel Venom Compound Ei46_variant;Novel;Male	Absence;Signal Peptide	CS pos: 19-20. Pr: 0.7843	0.7843;Stop codon present;238_2	Digestion Sp2;10	48.58;NA;NA;NA;>TRINITY_DN1908_c0_g2_i3:True:341;;TCTCTCCGAGTAGCACAAAACTAATCAAATAGAAATTTCCAGCCATGTTTCTCACAAAACAGTGATTCTTTCCTTGTAATGTTTGTTACTTTAACTTATCCACATTATCTTCCTTCCAATTCCCTTCAAGATATTTTAGATAAGTGCTCTTTTGTCCACTCCTGTAAATACTTTTGTTACGTTTAAGAAGCCCACATCCAACTTTAAGTGTTCTATCCTCGTACAGGTCTGTTCCAAAATTTTCATTAGAAACCAATCCTTCTTCTTGTTTACTCACAAATATATTTGTGACTCACAAACGCGTATAATCGTTCCTATAAATTTGTTTTAAGCATTTGTAACAGCTACT…	TRINITY_DN49220_c0_g1_i1:False:194	98.000	50	0.44642857142857145;NA;NA;6;93;10958.23622;NA;NA
Novel Venom Compound Ei47;Novel;Male	Expressionlevel;Signal Peptide	CS pos: 21-22. Pr: 0.9816	0.9816;Stop codon present;239	Digestion Sp2;19	48.29;NA;NA;NA;>TRINITY_DN2109_c0_g1_i1:True:65;>TRINITY_DN21738_c0_g1_i1:False:586;TCTGCGCATGATAAAAGCTCTTGATCGTTTATGTCAGCTACACTTGTACAGTACATTGCTGATGAGATATTTCTTATATAGTAGTAGTATTACTAGTGGAACACAGATTAGGCATGATCAACTTCTATACCGTCAATCTCTTCGTTTTGTTTCTTTTGCCAGTTTCGGTTTTATCTATTACTTTCACACGCCGTGATACTCTTAAAGAACCCTATGCTAGATACCTTTGCAAGGCTAATAGTAGCATTCTAGTTGACATTATCCGTTGTTTTCATGAAACAGCCCACTTGTGCTTTAGGTGCAAAATACACCAAC…	98.980	98	0.9074074074074074;3853.21;14.9295;2.52448;NA;NA;NA;NA;NA;NA;Transcriptome;Insolution_Sp9Female	TRINITY_DN28787_c0_g1_i1:False:666	31.469	143	1.0437956204379562;Transcriptome_Sp9Female	TRINITY_DN21738_c0_g1_i1:False:586	100.000	137	1.0;NA;NA;9;116;13789.87165;NA;NA
Novel Venom Compound Ei48;Novel;Female	Expressionlevel;Signal Peptide	CS pos: 23-24. Pr: 0.9694	0.9694;Stop codon present;254	Digestion Sp2;30	43.52;43	123.42;17	37.58;24	82.65;>TRINITY_DN176_c0_g3_i3:False:1639;>TRINITY_DN110_c0_g1_i1:False:1986;TAACTAGATGTCTTTACATTGCACAATCACATGAAACATCTCCAATTCAATAAGCCATTTCTTGTAATTCAGTTTATTTAACTAATCCCACACGATTTATTTTAATGACCTAGATTGACAAGAATTCTTGTTTGTGTTTGATTTATTTGCGAGTGCTGTAGAATTATTGACGAAAATTCTGTATGTGACATATTAGTTAATTGGTATAATTTTGAAAGTGTGTTATACGAGGTATCTTCAGGCACTACAATACATACATAACACGTAGTTTTCCACTAAGCAGTTCGAAATTATCATAGATTCCTGGGGAGATAGTTTCGTTT…	73; Potassium channel toxin kappa-KTx 5.1 OS=Heterometrus laoticus OX=217256 PE=1 SV=1;40.426	47	6.84e-04;NA;NA;NA;Orbitrapmatches	Transcriptome;Insolution_Sp9Female	TRINITY_DN110_c0_g1_i1:False:1986	100.000	60	1.0;Transcriptome_Sp9Female	TRINITY_DN110_c0_g1_i1:False:1986	100.000	60	1.0;NA;NA;0;37;4323.1131;Mass: 1297.60323 (QNNIDLEMNPK)	PTMs: A	pQ	Mass: 1297.60323 (QNNIDLEMNPK)	PTMs: A	pQ	Mass: 1297.60323 (QNNIDLEMNPK)	PTMs: A	pQ	Mass: 1297.60323 (QNNIDLEMNPK)	PTMs: A	pQ;Mass: 1297.60323 (QNNIDLEMNPK)	PTMs: A	pQ	Mass: 1297.60323 (QNNIDLEMNPK)	PTMs: A	pQ	Mass: 1297.60323 (QNNIDLEMNPK)	PTMs: A	pQ	Mass: 1297.60323 (QNNIDLEMNPK)	PTMs: A	pQ
Novel Venom Compound Ei48_variant;Novel;Male	Absence;Signal Peptide	CS pos: 37-38. Pr: 0.9728	0.9728;Stop codon present;254_2	Digestion Sp2;20	43.52;28	123.42;NA;NA;>TRINITY_DN176_c0_g3_i1:False:1741;;TAACTAGATGTCTTTACATTGCACAATCACATGAAACATCTCCAATTCAATAAGCCATTTCTTGTAATTCAGTTTATTTAACTAATCCCACACGATTTATTTTAATGACCTAGATTGACAAGAATTCTTGTTTGTGTTTGATTTATTTGCGAGTGCTGTAGAATTATTGACGAAAATTCTGTATGTGACATATTAGTTAATTGGTATAATTTTGAAAGTGTGTTATACGAGGTATCTTCAGGCACTACAATACATACATAACACGTAGTTTTCCACTAAGCAGTTCGAAATTATCATAGATTCCTGGGGAGATAGTTTCGTTTCTCAATAATTAAATAAACTTTTCTGAA…	73; Potassium channel toxin kappa-KTx 5.1 OS=Heterometrus laoticus OX=217256 PE=1 SV=1;40.426	47	0.002;NA;NA;NA;;Insolution_Sp9Female	TRINITY_DN110_c0_g1_i1:False:1986	100.000	60	0.8108108108108109;Transcriptome_Sp9Female	TRINITY_DN110_c0_g1_i1:False:1986	100.000	63	0.8513513513513513;NA;NA;0;37;4323.1131;Mass: 1297.60323 (QNNIDLEMNPK)	PTMs: A	pQ	Mass: 1297.60323 (QNNIDLEMNPK)	PTMs: A	pQ	Mass: 1297.60323 (QNNIDLEMNPK)	PTMs: A	pQ	Mass: 1297.60323 (QNNIDLEMNPK)	PTMs: A	pQ;NA
Novel Venom Compound Ei49;Novel;Male	Expressionlevel;Signal Peptide	CS pos: 19-20. Pr: 0.9853	0.9853;Stop codon present;255_1	Digestion Sp2;28	42.08;NA;NA;NA;>TRINITY_DN21_c0_g1_i1:False:650;>TRINITY_DN574_c0_g2_i2:True:43;GTTTAAAAGTTTGTTACTTTTATAGTGAACGTTAATCTTTTATTTCTGAAAGTGTTTCCAAATGAAACTAAGTATCAAATGTAAAATACAATGTAGCCCTGTAAATATACAAATTATGCAAATGGCACCCAATTTTCCAAACTGAATAAATACTTGATGTATTCATAATTTTAAAGAAATCTTAAATTTATTTTTTTATATCTATTATCAAAAATTTTCTTGAGAAATGTTCTGCTGGCAGGACGAGGAATCTTCACTCTTGATCGTATATGATGAGAATTCCTAGTATCTTGCTAAATTGGCACATCTCTGAATGTCA…	100.000	122	1.0;150.752;6.81495;3.64493;sp|P0CJ09|VP184_LYCMC	114; Venom protein 184 OS=Lychas mucronatus OX=172552 PE=3 SV=1;22.667	75	0.005;NA;NA;NA;Transcriptome;Insolution_Sp9Female	TRINITY_DN574_c0_g1_i1:True:16	65.169	89	0.7739130434782608;Transcriptome_Sp9Female	TRINITY_DN574_c0_g2_i2:True:43	100.000	115	1.0;NA;NA;6;96;10935.55495;NA;NA
Novel Venom Compound Ei50;Novel;Male	Absence;Signal Peptide	CS pos: 23-24. Pr: 0.9795	0.9795;Stop codon present;259_2	Digestion Sp2;13	41.36;NA;NA;NA;>TRINITY_DN1792_c0_g2_i3:False:397;;TTTTTTTTTTTTAAACTAATAAAGTATTTTTATTGCTTTGTGTAATAACATCTTTTCTTATACCATCAAGTTAGTTCTCTAAATTTATATACTAGTTAGTACAATTGGTTACAATTTCAGAGTGTTAAAAACTATATGGGGCACAGGTATTGATTGCATCATATGGCGCAATGATCTCTACATTCATCAAATCGATATCCTCCTGCAAAGCATATATTGTAGCAGTTCTTTTGCATTTCCAGCATTTTGTTTGTGGCGTCGTTTCCAATCCTTCCTTCGATGTTCGCCAGCCCTTGAGTAACGGCAAAAACAAAAATCAGAAGCAAAGCAAATTTAATCTTTCTGAAA…	64.286	70	1.0;452.21;NA;35.6406;NA;NA;NA;NA;NA;NA;;No hits in Other Sex;Transcriptome_Sp9Female	TRINITY_DN46785_c0_g1_i1:True:16	100.000	44	0.6875;NA;NA;4;41;4713.08035;NA;NA
Novel Venom Compound Ei51;Novel;Male	Absence;Signal Peptide	CS pos: 20-21. Pr: 0.6088	0.6088;Stop codon present;271	Digestion Sp2;24	36.1;NA;NA;NA;>TRINITY_DN1669_c0_g1_i1:False:656;;GACGTCTGGGTAATGCTGCATATCTAAGAAGAAAAATATGATAATTAGAATATTAAAAGTTTACGTAATTATGAACACAGATTAGAAATAAGGCTTACATTAATTCTAGTAATGGATATAGCCTACTAATAGAATTAACTTGCACACATTGATATTTATTTAACAAATTCCTATCTTAATTAACTTACGAGTAGGTGAACTTACTCATTTTGAAAGATCCAGCTTGGCACAGAGACTCATAAATAATGACGCTTGGCAAGGTTGAACGCAGCATAGAGTAATGATGTCATCGGTAGTGACTGGAATTACAAAACGAGTTTTGGTCTAGTCATATATTAAAACGCTCTTA…	TRINITY_DN54840_c0_g1_i1:True:1	95.522	67	1.0;NA;NA;3;47;5577.75641;NA;NA
Novel Venom Compound Ei51_variant;Novel;Male	Expressionlevel;Signal Peptide	CS pos: 18-19. Pr: 0.9861	0.9861;Stop codon present;271_1	Digestion Sp2;17	36.1;NA;NA;NA;>TRINITY_DN1669_c0_g1_i2:False:469;>TRINITY_DN54840_c0_g1_i1:True:1;TTTTTTTTTTTTAACTTTAATTCTTTATTTAAAACCGAAATGCTTGGCACAAATGGGTGTAAAGAATACTTGGAATGATTATAAGATTAACATAAATTTAATTTCGCTTTTTTCGTCGGAAAAGGAACACGTAACGACGTCTGGGTAATGCTGCATATTCATTTTGAAAGATCCAGCTTGGCACAGAGACTCATAAATAATGACGCTTGGCAAGGTTGAACGCAGCATAGAGTAATGATGTCATCGGTAGTGAAGTCCTCCTCCTGTCTTCGGTCTCTTAAGATGCGCTCGGGAAGACTCCTCTTCATTTGTGTACA…	TRINITY_DN54840_c0_g1_i1:True:1	100.000	94	1.0;NA;SUPERFAMILY	Insulin-like	3.66E-8| Gene3D	-	G3DSA:1.10.100.10	1.4E-5;6;76;8657.25538;NA;NA
Novel Venom Compound Ei52;Novel;Female	Expressionlevel;Signal Peptide	CS pos: 23-24. Pr: 0.9778	0.9778;Stop codon present;272_1	Digestion Sp2;12	36.1;NA;20	55.30;16	102.05;>TRINITY_DN588_c0_g1_i2:False:535;>TRINITY_DN341_c0_g1_i1:False:751;CCGCTATTGTCTTGGCATAATCGTGAAGATAACTTAATACTAATCTTGTATCTTCGGCAATTCCAAACTTTATTTCAGTGTTTATTTATACAAATCTCCATATAAACATAGTTTCAAATTCTTAATTACATTTTTAAGCATCAATGTGTAACAGACGATGACGAAATTTGCTTTTTCTGGTGCTGTTGATGCAGCTATCCTTTAGTTTTGGTTGTAGGTTTAGCAGTCGTCTTAGCAGTGGTCTTTGTTGTAGTTCTTGCAGTTGTGGTAGGTTTCTTGGTAGTGGTGGTGGTACTAGTGGTAGTGAAAGATTTCCAAAATGGA…	Transcriptome;Insolution_Sp9Female	TRINITY_DN341_c0_g1_i1:False:751	98.824	85	1.0;Transcriptome_Sp9Female	TRINITY_DN341_c0_g1_i1:False:751	98.824	85	1.0;NA;NA;0;62;7010.82319;NA;NA
Novel Venom Compound Ei53;Novel;Male	Expressionlevel;Signal Peptide	CS pos: 22-23. Pr: 0.9884	0.9884;Stop codon present;274	Digestion Sp2;24	35.57;NA;NA;NA;>TRINITY_DN158_c0_g2_i1:True:114;>TRINITY_DN28787_c0_g2_i1:False:488;ATTGGACAGTCACCTACGTATTACATTTCGTTGAACGTTTATGACTTAACTGCTGTGCTATAAGTTGCTAACACAATATTATTGCCGCAGTCGAGCCTGTTAGTAGAGTATTAATCAGTCATGAATACTTTCCACTTATTCGTTATCGTAGGGTTATTTTTATTCACGATTTCCTTATCATCCGCGCACCCTCAACACCACCCTAGGGCAAATGATACAGCTTACGTTAGATTTATTTGTGAGTCCACCGATGCAACCCAAAATGATATTATGGGTTGCTTTTTCCAAAGCCCAAAGGAGTATCTAAAAAGATAC…	100.000	139	1.0;1770.68;6.39632;54.1019;NA;NA;NA;NA;NA;NA;Transcriptome;Insolution_Sp9Female	TRINITY_DN28787_c0_g1_i1:False:666	69.466	131	0.9562043795620438;Transcriptome_Sp9Female	TRINITY_DN28787_c0_g2_i1:False:488	100.000	137	1.0;NA;NA;6;115;13345.3871;NA;NA
Novel Venom Compound Ei54;Novel;Male	Expressionlevel;Signal Peptide	CS pos: 18-19. Pr: 0.9845	0.9845;Stop codon present;277	Digestion Sp2;13	33.98;NA;NA;NA;>TRINITY_DN755_c1_g1_i1:False:479;>TRINITY_DN29763_c0_g1_i1:True:1;TTTTTTTTTTTTTAGTTTGAAAATTTTAATATTCTATTAAGCAGGTATAGTGATATATATACACAGCTTTAGTTTAATTTGGTATCTTCACAAAATGCATCTGTTTTTGTAGCATACATTGTTTGGTACCACATTATAGCAAGCACAATTTAAACACAAGAATTATAGAGCAATTGCTGGGTGTAGAAATAAAGGTTTACCAACGATAGCTGATTTCTTTTACAATCGTAAGAATTCAGATGATTACTCTACTGGAACTGGAATATACGTAGCATTTTCTGGTCCGTTATAAATAATAGCTTCGTATGATGACCTAT…	TRINITY_DN29763_c0_g1_i1:True:1	100.000	72	1.0;NA;NA;2;54;6237.05972;NA;NA
Novel Venom Compound Ei55;Novel;Unspecific;Signal Peptide	CS pos: 16-17. Pr: 0.6506	0.6506;Stop codon present;286	Digestion Sp2;10	30.08;NA;NA;NA;>TRINITY_DN2035_c0_g1_i1:False:549;>TRINITY_DN52256_c0_g1_i1:True:2;TTTTTTTTTTTTAGTTTGAGAATTTTAATATCTTGTTAAACAATTACAGCATTATACAATCTTTGTTTAATTTCGTACATTCACAAAGTGTACTTTTGTTTCTAACAAACATCGTTTAATATCACCGTACAGCGAGCTCATTTGAAAAACAAGATTTTTTAAACGAAATTACCAATTTTAGTAACAAATATTTCCAGTGATGATCGATTTCCTTTACAATCTGAATTTTATTCCTATATAGTAACGATACATAAACAATGAGGCTGTTAATTAAGTAACCAGATGGCTACTTAACTAGTTTTATTAGAATCTACTT…	TRINITY_DN52256_c0_g1_i1:True:2	98.361	61	1.0;NA;NA;4;45;4980.56252;NA;NA
Novel Venom Compound Ei56;Novel;Male	MALDI;Signal Peptide	CS pos: 25-26. Pr: 0.9762	0.9762;Stop codon present;4	Reduced Sp2;75	149.99;54	264.08;32	66.12;54	132.12;>TRINITY_DN95_c0_g1_i4:False:307;>TRINITY_DN698_c0_g1_i2:False:294;TTTTTTTTTTGCTTAATTATTCTTTTTTATTAGATGCAGTTTCTTCGCAATACATTGATTACAGTTTTCTATTAATTACGAAATCCGGAAGATTATTATATTCAAAGTAAAGATTTTGGGAACAGTACACTCCGTCTACCAGGTCCATTTTTGTAAGCCTCTTCCGCCTGGAGCAACTGGATGAAATAATCGTCATAGCTGTAGCCGGTGAGAACACAAGCGAACTGGGAAGCGAAAGCTACAAGCAGAAGTATGCAAATAGTTGCGGGAATGGAAGCCATCTTCACGGTATCGAAATTTCTTTTCGTTTATTAAACGTCTTCTT…	44.828	58	0.9830508474576272;192.445;52.2637;4.30053;NA;NA;NA;NA;NA;NA;Orbitrapmatches	Transcriptome;Insolution_Sp9Female	TRINITY_DN698_c0_g1_i2:False:294	100.000	59	1.0;Transcriptome_Sp9Female	TRINITY_DN698_c0_g1_i2:False:294	100.000	59	1.0;NA;NA;0;34;3937.99441;Mass: 2583.1899499999995 (GYSYDDYFIQLLQAEEAYKNGP)	PTMs: A	Mass: 2583.1899499999995 (GYSYDDYFIQLLQAEEAYKNGP)	PTMs: A;Mass: 2583.1899499999995 (GYSYDDYFIQLLQAEEAYKNGP)	PTMs: A	Mass: 2583.1899499999995 (GYSYDDYFIQLLQAEEAYKNGP)	PTMs: A
Novel Venom Compound Ei56_variant;Novel;Male	MALDI+Absence;Signal Peptide	CS pos: 18-19. Pr: 0.9818	0.9818;Stop codon present;4_1	Reduced Sp2;NA;54	264.08;NA;NA;>TRINITY_DN95_c0_g1_i2:False:307;;TTTTTTTTTTGCTTAATTATTCTTTTTTATTAGATGCAGTTTCTTCGCAATACATTGATTACAGTTTTCTATTAATTACGAAATCCGGAAGATTATTATATTCAAAGTAAAGATTTTGGGAACAGTACACTCCGTCTACCAGGTCCATTTTTGTAAGCCTCTTCCGCCTGGAGCAACTGGATGAAATAATCGTCATAGCTGTAGCCGGTGAGAACACAAGCGAACTGGGAAGCGAAAGCTACCAGCAGAATTATGCACATAGTTATGTGAATCGAAGACATCTTCGCGGTATCGAAATTTCTTTTCGTTTATAAAACGTCTTCTTCCTCAACCTTTCTATAATATAATACGG…	43.860	57	0.9661016949152542;0.301917;NA;4.30053;NA;NA;NA;NA;NA;NA;;Insolution_Sp9Female	TRINITY_DN698_c0_g1_i2:False:294	96.154	52	1.0;Transcriptome_Sp9Female	TRINITY_DN698_c0_g1_i2:False:294	96.154	52	1.0;NA;NA;0;34;3937.99441;Mass: 2583.1899499999995 (GYSYDDYFIQLLQAEEAYKNGP)	PTMs: A	Mass: 2583.1899499999995 (GYSYDDYFIQLLQAEEAYKNGP)	PTMs: A;NA
Novel Venom Compound Ei57;Novel;Male	Expressionlevel;Signal Peptide	CS pos: 26-27. Pr: 0.7451	0.7451;Stop codon present;24	Reduced Sp2;NA;22	141.19;NA;NA;>TRINITY_DN95_c0_g1_i3:False:375;>TRINITY_DN698_c0_g1_i4:False:339;TTTTTTTTTTTTGTTTCCTATTGTCTTTTATTAGATGCAGTTTATTTCCAATACACAGATTACGGTTTTCGATTAATTACGAAATCCGGATATATATATTCCAGTGATATAAATCACATCTTCGTGAAGAACAAAGTGAGATCTAACTGGTGCCATCGTTTGTTCGATCGGATAAAGATTTTGGGAAGACCACACTCCGTCTACCAGGTGAGGTAACGAGAACCTCATCATTCCACTTCCACATGTCGCCATAATAGTCGTAGTTGTTGTAACCGGTGATAACACAAGCGAACTGGGAAGCGAAAGCTACCAGCAGAAT…	TRINITY_DN698_c0_g1_i2:False:294	59.322	59	0.8676470588235294;Transcriptome_Sp9Female	TRINITY_DN698_c0_g1_i4:False:339	100.000	68	1.0;NA;NA;0;42;4932.27795;NA;NA
Novel Venom Compound Ei58;Novel;Male	MALDI+Expressionlevel;Signal Peptide	CS pos: 25-26. Pr: 0.9762	0.9762;Stop codon present;4_2	Reduced Sp2;75	149.99;54	264.08;32	66.12;54	132.12;>TRINITY_DN95_c0_g1_i8:False:307;>TRINITY_DN698_c0_g1_i2:False:294;TTTTTTTTTTGCTTAATTATTCTTTTTTATTAGATGCAGTTTCTTCGCAATACATTGATTACAGTTTTCTATTAATTACGAAATCCGGAAGATTATTATATTCAAAGTAAAGATTTTGGGAACAGTACACTCCGTCTACCAGGTCCATTTTTGTAAGCCTCTTCCGCCTGGAGCAACTGGATGAAATAATCGTCATAGCTGTAGCCGGTGAGAACACAAGCGAACTGGGAAGCGAAAGCTACAAGCAGAAGTATGCAAATAGTTGCGGGAATGGAAGCCATCTTCACGGTATCGAAATTTCTTTTCGTTTATTAAACGTCTTCTT…	44.828	58	0.9830508474576272;2202.72;52.2637;4.30053;NA;NA;NA;NA;NA;NA;Orbitrapmatches	Transcriptome;Insolution_Sp9Female	TRINITY_DN698_c0_g1_i2:False:294	100.000	59	1.0;Transcriptome_Sp9Female	TRINITY_DN698_c0_g1_i2:False:294	100.000	59	1.0;NA;NA;0;34;3937.99441;Mass: 1437.81142 (FIGALWSGIKSLF)	PTMs: A	Mass: 1437.81142 (FIGALWSGIKSLF)	PTMs: A;Mass: 2583.1899499999995 (GYSYDDYFIQLLQAEEAYKNGP)	PTMs: A	Mass: 2583.1899499999995 (GYSYDDYFIQLLQAEEAYKNGP)	PTMs: A
Novel Venom Compound Ei59;Novel;Male	Expressionlevel;Signal Peptide	CS pos: 22-23. Pr: 0.9839	0.9839;Stop codon present;43	Reduced Sp2;NA;29	105.83;NA;NA;>TRINITY_DN1757_c0_g5_i1:False:1893;>TRINITY_DN13778_c0_g1_i1:False:469;ATTGATTCCTATGGAAATTATGCTTTTTATCGCTTACATAACACTTATGTTTGTTTATCGCTTGTCTTGTCTCACTTACTGAGGTGGTTTCGTTTCCATACGTCACCCGAGGCCTTACACACGATGTCTTTACAGCCTCTACTGCGACTGACTCCCATATTCAGTATAACGAAATAATTTTTATGGTCCCGTGAGTTTCGTTATAACGGGATTTCACCTGTATTAAAATAGAGGGGGTCGACGAAAAGTCGGGAAATGCTTGAAGGGGGATAAAAAGTTTGGGGTTCCCTGCTATATGGTTATGGCATCTCCAC…	TRINITY_DN13778_c0_g1_i1:False:469	100.000	63	1.0;NA;NA;0;41;4630.3939;NA;NA
Novel Venom Compound Ei60;Novel;Unspecific;Signal Peptide	CS pos: 13-14. Pr: 0.9627	0.9627;Stop codon present;57	Reduced Sp2;NA;23	80.83;NA;23	60.31;>TRINITY_DN4179_c0_g1_i1:False:400;>TRINITY_DN55982_c0_g1_i1:False:372;TGTTTTGATTTTATTTCGCGCAAAATAAGACATATTTTCATACGATTTTCCATAATAAGACATATTTTCATACCATATCAGCTTATAATAGTTGAGTTAGCTTAAAGACTTACCATAATTCATAAAAAAAATAATGCCAAATTATTTCAAGATAAATTTTAATTCAGTTTCTAAAATTTTTCACGATTTCGTTGCTTAAATGTCATCTTTCTTTGGACTTTTGAAAGTATTTAACGCTTTCCTGCGTTTATCAGAGGGAAATGATGATCGTCTCCATCAACCTCATAGTCGTTGTTTTCCAAAGATTCATCATAATAATCAG…	100.000	29	1.0;523.92;1882.35;3.40123;NA;NA;NA;NA;NA;NA;Orbitrapmatches	Transcriptome;Insolution_Sp9Female	TRINITY_DN55982_c0_g1_i1:False:372	100.000	42	1.0;Transcriptome_Sp9Female	TRINITY_DN55982_c0_g1_i1:False:372	100.000	42	1.0;NA;NA;0;29;3440.4759;NA;NA
Novel Venom Compound Ei61;Novel;Male	Absence;Signal Peptide	CS pos: 25-26. Pr: 0.9727	0.9727;Stop codon present;64	Reduced Sp2;NA;14	74.20;NA;NA;>TRINITY_DN324_c0_g1_i2:True:538;;GTTTTAATCACATCTTCATTTTTCTTCCATTCGCAAACAAAATACAAATTCAGTCCCGAATTTCCTTCCTTAGCATTAAGTTAAAATAACGACGTAACTGGCAATACTGACTCTCACAAATCAACCTGTCAAAAGTGACAAATATTACAACAGAACTCTCGAAACCCATCTATCAGATTTAACATCGATATTTGTTGAATCAGGACGAGGTATAGGTTATTAATTTCAATTCTGTAACTCACTTTTCGCAATTTTGAGTCGCTCAGAACTGGTTTTCTTTACTACCTATTGCGTCAGTACGTCGAATTTGTGGAATACGTGGCATCTGTTGTCTATGCATAAAGCAATAAAAT…	93.220	59	1.0;381.342;NA;4.30053;NA;NA;NA;NA;NA;NA;;Insolution_Sp9Female	TRINITY_DN698_c0_g1_i2:False:294	47.619	63	1.0;Transcriptome_Sp9Female	TRINITY_DN45443_c0_g1_i1:True:19	93.651	63	1.0;NA;NA;0;38;4428.22795;NA;NA
Novel Venom Compound Ei62;Novel;Male	MALDI+Absence;Signal Peptide	CS pos: 22-23. Pr: 0.9817	0.9817;Stop codon present;73	Reduced Sp2;NA;18	63.81;NA;NA;>TRINITY_DN21_c0_g3_i3:False:555;;GTCCTTCTGTATGTAATATTTCACCTTTTAGGTGATAAACACGACACAACCTTGTTTATATGCGTAATACATCCTTATTTAAGAAAAGTCTTTAATTTTTACAACAGTTAAAAATGTTTCTATATATTTGCTTAATTAGGCTTTACATTTGCTTAATCATTAAATGCACTTTCAGGAAAATTTTCATAAAACTGTGGTTCATGATGGATTGACTGTCTGAAAACTTTAAGCCATGTTGTCTTTTGTAGGCCTTTTTACAGGTTCATCCACATCATCACTTACTTCATCATTAACTGTTATTTTTCTTCTCTATTTGCATTTTGTGGTTTCCTAGGTGTTCTTGTCAATTGGAT…	55.556	54	0.5294117647058824;18.1906;NA;4.2049;NA;NA;NA;NA;NA;NA;;No hits in Other Sex;Transcriptome_Sp9Female	TRINITY_DN1070_c0_g1_i1:False:569	93.750	64	0.9846153846153847;NA;NA;2;43;5187.27629;Mass: 1970.8635000000002 (HLNRSVDEAFDFFCDR)	PTMs:;NA
Novel Venom Compound Ei63;Novel;Male	Absence;Signal Peptide	CS pos: 20-21. Pr: 0.6804	0.6804;Stop codon present;103	Reduced Sp2;NA;15	38.04;NA;NA;>TRINITY_DN25589_c0_g1_i1:True:233;;CAAAACCCAATCTCCATCGCTTTTTCCACGTTGCAAATTTTAATTAATGGTTAGTTTATTGCATCGACCATTATGTCACAAGCAGAATGCGATTGGCTGAAAAAGTCTCCAATAGAGTAATTACAGGTAGACAGACATTGAGTATATAAACAGAAACCGAATGAAACTTTATGTCACATTCTACAGAAAATTACCGTATAGAAGAGACGTGCTTCTTTCAAGTTATCGGATAAAGCAAGATGAATAGTTGTGTTCTCTATTTCGTATTCATTTTGTTGACAAGTAGAGGAAGTCTTCAGGACGCCTTTGTGGAAGATACTTTGGGTGAAATTGAAGACATAATGGAAGTTG…	TRINITY_DN50379_c0_g1_i1:True:2	100.000	51	0.7391304347826086;NA;NA;0;49;5463.55375;NA;NA
Novel Venom Compound Ei64;Novel;Female	Absence;Signal Peptide	CS pos: 24-25. Pr: 0.6758	0.6758;No Stop codon present;42	Digestion Sp9;NA;NA;25	154.72;NA;;>TRINITY_DN18_c1_g1_i8:False:2782;AGTTCTGTTATTTTAGTTTTTTCTTTTTCTCTTTCCTTATACCATGTTTCTTTACTAGACATTCCCAGCTCTTCTCTGTCCCAAACATTTGTTCTCCACTCATTTTCAACAGTTGTTTCTGTTCTTTCTGATGTTGGTTCATTAGTCACTTCAGGAAATGTTTTAGTCGTTTCCTCTTTTTCATCATATCTTTCACCATGATCCCATGCTTCTGTGTTCCATTCTTCAATCCCCCATCTCTCATCAGAAGATGATCCTGATTTATCTGAAGTTGGCTGATTTGTCAATTTAGGGAGTTCTGTTATTTTAGTGTTTTCTTTTTCTCTTTCCTTATACCATGTTTCTTTATTAGAC…	TRINITY_DN1366_c0_g1_i1:False:2843	99.086	875	0.9541984732824428;Transcriptome_Sp2Male	TRINITY_DN1366_c0_g1_i1:False:2843	99.086	875	0.9541984732824428;NA;NA;0;893;106259.741;NA;NA
Novel Venom Compound Ei65;Novel;Female	Absence;Signal Peptide	CS pos: 19-20. Pr: 0.9922	0.9922;Stop codon present;120_1	Digestion Sp9;NA;NA;61	94.74;NA;;>TRINITY_DN1070_c0_g1_i2:False:587;ATTTATTTTCATGTTGAGCAAAATTCAAAAGTAGTGCATTTCTCTACAGAACCCATTTTGTCTGCCTCAGCATGTCGTGTTGCTAATATCCATCTTGATTATGTAAAAATAACAGTGTTGTTTTCAATGAAGGGGTATGAAGGGTGTTGTTTCTCTTTATCATTTCCCCATTCAATTTCATTGTTAGATTTACTTTTTGTCAACAAAACTTCTAAGGCAATCATTAACAACCATAATAGCTTCGATGCTGTAATGATGATTGTAAAGAGGAACTAAACATTTGGTAATTTCCATATCCCAGGAACCATCTGACATATACTGACTACAGAACCTATCATAAACTGTCATTAGGGT…	100.000	132	1.0;;5.37908;30.5692;NA;NA;NA;NA;NA;NA;;Insolution_Sp2Male	TRINITY_DN21_c0_g3_i4:False:1004	79.832	119	0.9916666666666667;Transcriptome_Sp2Male	TRINITY_DN21_c0_g3_i4:False:1004	79.832	119	0.9916666666666667;NA;NA;6;101;11970.55713;NA;NA
Novel Venom Compound Ei66;Novel;Female	Absence;Signal Peptide	CS pos: 21-22. Pr: 0.9818	0.9818;Stop codon present;136	Digestion Sp9;NA;NA;43	85.86;NA;;>TRINITY_DN470_c0_g1_i6:True:74;ATAAGAGCGTCTGGTTGACGTGTCTTTTAGCAGAAGAGTCAGTGGAATCAAAGGAACAGGAAGAGGAAGCTTGAATGTTAAACCATTGTACATTAAAAATGATTCATTTTCTCATCCTTGGAATCGTGCTAATTGCGTCTGAAATAAGCAGCGTTTATGGTCGCACCGAAAGCACTGTATACTGCAGCTTTAATACCAGACAGAGGGATGTTTGGATTAAATGTTATTTAAATAGTGGCTTGGCAACAGCTGTCTACGAATATCCGAAAGCCCTAATTGCATGCATTCTAGGAAGAACACAAGTTGCTGATCTGCGTGCATCGCTCGATGACTTTTGCACAAAACAGAGAGAGAACT…	TRINITY_DN193_c0_g1_i10:True:267	93.939	132	1.0;Transcriptome_Sp2Male	TRINITY_DN193_c0_g1_i10:True:267	93.939	132	1.0;NA;NA;6;111;13035.51572;NA;NA
Novel Venom Compound Ei67;Novel;Female	Absence;Signal Peptide	CS pos: 24-25. Pr: 0.8172	0.8172;No Stop codon present;153	Digestion Sp9;NA;NA;16	79.11;NA;;>TRINITY_DN16311_c0_g1_i1:True:2;AATTCTCTCTGCCTATTTCACACAGTTTAAATGCTACTCCATTGAACATACGATATCTACAAATGGGCAAGTTAAGCATGAGACTTAAAGTTTTGCCCTCTTTCTATGGATTTCTCTTAAGTTGCTTTGTTATTGAAAACGCCAAAGCTTATGTAGAAGATGCTTGTTCTATTGTTAATGATCGTGAAGAAAATGGATATGTAGTTTGTGGAAAAGGCAATTCTATATGTGAAAAAATTAAACACAGTGAAAGCTACAAATGTATAGTGTGCCAGGATCATGAAATCCCTTTGGGAAACATATGCTTAGATCCTTGCACCCGAAGTCTTACTCCAAAACCACCGGGAATTGAATAT…	47.664	107	1.0;;2.78025;7.64434;NA;NA;NA;NA;NA;NA;;Insolution_Sp2Male	TRINITY_DN856_c1_g1_i2:False:489	63.200	125	0.8278145695364238;Transcriptome_Sp2Male	TRINITY_DN856_c2_g1_i1:False:255	100.000	85	0.5629139072847682;NA;NA;15;127;14228.57728;NA;NA
Novel Venom Compound Ei68;Novel;Female	Absence;Signal Peptide	CS pos: 21-22. Pr: 0.9818	0.9818;Stop codon present;155	Digestion Sp9;NA;NA;34	78.18;NA;;>TRINITY_DN470_c0_g1_i2:True:74;ATAAGAGCGTCTGGTTGACGTGTCTTTTAGCAGAAGAGTCAGTGGAATCAAAGGAACAGGAAGAGGAAGCTTGAATGTTAAACCATTGTACATTAAAAATGATTCATTTTCTCATCCTTGGAATCGTGCTAATTGCGTCTGAAATAAGCAGCGTTTATGGTCGCACCGAAAGCACTGTATACTGCAGCTTTAATACCAGACAGAGGGATGTTTGGATTAAATGTTATTTAAATAGTGGCTTGGCAACAGCTGTCTACGAATATCCGAAAGCCCTAATTGCATGCATTCTAGGAAGAACACAAGTTGCTGATCTGCGTGCATCGCTCGATGACTTTTGCACAAAACAGAGCGAGAACT…	TRINITY_DN193_c0_g1_i3:True:267	93.182	132	1.0;Transcriptome_Sp2Male	TRINITY_DN193_c0_g1_i3:True:267	93.182	132	1.0;NA;NA;6;111;12770.28169;NA;NA
Novel Venom Compound Ei69;Novel;Unspecific;Signal Peptide	CS pos: 25-26. Pr: 0.9762	0.9762;Stop codon present;182	Digestion Sp9;NA;NA;32	66.12;54	132.12;>TRINITY_DN95_c0_g1_i8:False:307;>TRINITY_DN698_c0_g1_i2:False:294;CTTAATTATTGTTTTTTATTAGATGCAGTTTCTTCGCAAAACAGATTACAGTTTTCTATTAATTACGAAATCCGGAAGATTATTATATTCAAAGTAAAGATTTTGGGAACAGTACACTCCGTCTACCAGGTCCATTTTTGTAAGCCTCTTCCGCCTGGAGCAACTGGATGAAATAATCGTCATAGCTGTAGCCGGTGAGAACACAAGCGAACTGGGAAGCGAAAGCTACAAGCAGAAGTATGCAAATAGTTGCGGGAATGGAAGCCATCTTCACGGTATCGAAATTTCTTTTCGTTTATTAAACGTCTTCTTCCTTAGCTTTTGA…	44.828	58	0.9830508474576272;2202.72;52.2637;4.30053;NA;NA;NA;NA;NA;NA;Transcriptome;No hits in Other Sex;Transcriptome_Sp2Male	TRINITY_DN95_c0_g1_i8:False:307	100.000	59	1.0;NA;NA;0;34;3937.99441;NA;Mass: 2583.1899499999995 (GYSYDDYFIQLLQAEEAYKNGP)	PTMs: A	Mass: 2583.1899499999995 (GYSYDDYFIQLLQAEEAYKNGP)	PTMs: A
Novel Venom Compound Ei70;Novel;Female	Absence;Signal Peptide	CS pos: 25-26. Pr: 0.9792	0.9792;Stop codon present;202	Digestion Sp9;NA;NA;26	58.81;NA;;>TRINITY_DN112_c0_g1_i1:True:1;CATCTGCAAAAAATTCTCTGCGTGTTTTATGCCGTACACAGTTTTAAGTGCTACTTTACTGAATATACAATATTTACAAATAAACAGGTTGAGCATGAAACTCAAGGTTTTACCCTCTTTCTATGGATTTCTTCTCTTGTGTTGTTTTATTACTGAAATCGTCAAAGCTGAAGTAGAAGATCCTTGCGCCGATATTGATAGTAATGGAGACACTGGATACCAAGTTTGTGAGAGAACCGACTCCGTGTGTGAAATTGACCACTCAATCGAACATGGTAAAAACTACAAATGTTCACCATGCGGTATTCATGAAATCGTCGATAACAACAGATGCGTGGTTGGGTGCAGATCGAAATTT…	TRINITY_DN856_c1_g1_i2:False:489	41.250	80	0.7272727272727273;Transcriptome_Sp2Male	TRINITY_DN1096_c0_g1_i1:True:2	94.545	110	1.0;NA;NA;9;85;9363.2481;NA;NA
Novel Venom Compound Ei71;Novel;Female	Expressionlevel;Signal Peptide	CS pos: 25-26. Pr: 0.9823	0.9823;Stop codon present;209	Digestion Sp9;NA;NA;12	56.67;NA;>TRINITY_DN24545_c0_g1_i1:False:805;>TRINITY_DN58602_c0_g1_i1:False:831;TTTTTTTTTTACACAAGACTAAATTTTAATTTTATTGCCATTCTATACAGACATTGTCCATAGATACAAGTATAGTAATAGAATATGTCCACACTACAAGACTTCTGGTAAAGTTACATCAATAATTTTTATTTCTGTCAATTGATTTCTTCATTCGGCTAAACTTTAAAATGTTAAGACGCCTCACTAAAATGAAGCCAATTCAAATTCTTTGACTTTCGAATCTTCTCTTCTTTACAACTATGACACAGGCAATTATTCCGATAGTTACTGCCAATATTGCGATAATTATGCCTACGATTGCTCCTGCAGGTAAAC…	36.364	132	0.7333333333333333;44.2651;537.062;113.578;NA;NA;NA;NA;NA;NA;Transcriptome;No hits in Other Sex;Transcriptome_Sp2Male	TRINITY_DN24545_c0_g1_i1:False:805	100.000	170	1.0;NA;NA;6;145;15853.17552;NA;NA
Novel Venom Compound Ei72;Novel;Unspecific;Signal Peptide	CS pos: 18-19. Pr: 0.9623	0.9623;Stop codon present;240	Digestion Sp9;NA;NA;11	46.00;30	131.62;>TRINITY_DN1296_c0_g2_i2:True:78;>TRINITY_DN1389_c0_g2_i1:True:237;CTTTAAAAACGCTCCATTTGCCATACATCCATAACGCAAAGTTAATTTTCACTTATTGAACCAGAAAGAGAACGGATTTGGATTATCTGGATGCATTTACTGTTTGCTGTTTACTACAAGTAACGATGCCTTTATTTCAATAACTGACTTCAGCCAGCTGCTTTGTTGGCCAGGATTCAAATTATAATGGTATATAGCTAAGCTCTGCTTTCGTATATAATATGCTTGATAAACTGAATGAATGTTTCAGAAGGTTTAAATACAGGCCGAAGTAATACACATTACAGCACAGAAATATTAAATCAGAAAGATCCAATTAGAATGA…	TRINITY_DN1296_c0_g2_i2:True:78	98.438	64	1.0;NA;NA;4;46;5285.69089;NA;Mass: 3523.8142700000003 (ELATCIEKCTKNKNQKVECKTKCTKLYPKR)	PTMs: A	C-C	Mass: 3523.8142700000003 (ELATCIEKCTKNKNQKVECKTKCTKLYPKR)	PTMs: A	C-C
Novel Venom Compound Ei73;Novel;Unspecific;Signal Peptide	CS pos: 19-20. Pr: 0.9777	0.9777;Stop codon present;270	Digestion Sp9;NA;NA;15	38.21;NA;>TRINITY_DN1824_c0_g2_i1:True:22;>TRINITY_DN602_c0_g1_i1:True:542;CAACAACAATCGGTAGACATGGCGTTTCAACCGCCTTCCGCTCGACAAGAAATTCAGAATAGAAAGATTTTGGAGGAACTTCAACAACAGAAGAAGCAGTTGATGTTAAAGCAACAAGGTCAAACTAATTTGGGGACATCTAATATTGGGGCAACACCGCCTATGCCAATGTCATTGGAAGCACATGCTCTTACTTCATCACAAAGGGCAGCCTTACAGCACGCACATGCCAATTCTGTAGGTTACTTCATTACACAAGATTCGTCGTTTGGAAATCTTATTTTGCCAGTTTTACCTCGTCTAGAAAAGTGAGCAGTACATCAT…	96.667	60	1.0;6.33559;27.2749;0.857897;NA;NA;NA;NA;NA;NA;Transcriptome;No hits in Other Sex;Transcriptome_Sp2Male	TRINITY_DN1824_c0_g2_i1:True:22	100.000	81	1.0;NA;NA;3;62;6993.38644;NA;NA
Novel Venom Compound Ei74;Novel;Female	Absence;Signal Peptide	CS pos: 20-21. Pr: 0.9821	0.9821;Stop codon present;100	Reduced Sp9;NA;NA;NA;14	45.53;;>TRINITY_DN2006_c0_g1_i2:True:25;ATGCTTTTATTTCAACAGTTACTGAATACGTGTAGAAGGCAAACTTAAGTTAATAATCATGAAAATCGCCCTTGTCTTCGTAATTTTCATTGTCAGCTCCTTCGTTGAAACGGAAGGTGGAGATTTTGGGTTACTTGATTTACATATCTCATGTACCACAGATAGATATTGTATGATGAAGTGTAGGAGGGAAAAATGCCGATTGGGTAAATGCCTAAAAGAGATGTGCGTATGCAAACATTGCGAGAGCTATACTCTTTTCCAACGGTAATTCTTTTTTATGCAATAAAGATTGTTATATTCCATACAAATTTTAAATCAGAAAACAAAATAGCGAAATAAAAACTAATAGC;MKIAL…	68; Potassium channel toxin alpha-KTx OS=Hoffmannihadrurus gertschi OX=380989 PE=1 SV=1;30.882	68	4.95e-05;NA;NA;NA;;Insolution_Sp2Male	TRINITY_DN186_c0_g2_i2:False:321	51.429	70	1.0;Transcriptome_Sp2Male	TRINITY_DN186_c0_g3_i1:False:397	54.286	70	1.0;NA;NA;8;50;5950.75212;NA;NA
Uncharacterized Venom Compound Ei1;Enzyme;Unspecific;Signal Peptide	CS pos: 19-20. Pr: 0.9835	0.9835;Stop codon present;8	Digestion Sp2;85	310.51;4	69.64;83	249.42;NA;>TRINITY_DN337_c0_g1_i7:False:2062;>TRINITY_DN149_c0_g3_i1:True:29;TTTTTTTTTTTTAGCTATCACACCATTTTTAATAAATGAAATATTTTATTGTACAGTGTTTATTAAGAACAACTCGTCTTGAACAGAAGAATTAAACAGATCTTCATTGTCTTTTAGGGACACAACGTCGGATCTTCGCTGGCCCAGCCTATAAATTCATTCTTGTTTTGTTCCTTTAACCATAAGTAAAGAGGATGAAAGTAATCTAGCAAAGGCTGTGCATCTAGATGATTTGTCTCCCCTCCGGTAACTGCCTTCAGGGCTTCAGTCCACGGTTTTGATCTTCCGAGACTCAACATATTCTTCAAACGTGTTCCGGCCT…	51.108	632	0.9723076923076923;4771.53;2288.8;20.7057;NA;NA;NA;tr|A0A1W7RB55|A0A1W7RB55_9SCOR	621; Angiotensin-converting enzyme OS=Hadrurus spadix OX=141984 PE=3 SV=1;50.880	625	0.0;Orbitrapmatches	Transcriptome;Insolution_Sp9Female	TRINITY_DN149_c0_g3_i1:True:29	99.356	621	1.0;Transcriptome_Sp9Female	TRINITY_DN149_c0_g3_i1:True:29	99.356	621	1.0;NA;NA;13;602;69433.78684;NA;NA
Uncharacterized Venom Compound Ei2;Enzyme;Female	Expressionlevel;Signal Peptide	CS pos: 19-20. Pr: 0.9825	0.9825;Stop codon present;13_2	Digestion Sp2;52	282.18;NA;54	194.14;NA;>TRINITY_DN15159_c0_g1_i4:False:2126;>TRINITY_DN1233_c0_g1_i1:True:151;TTTTTTTTTTTTAATATAGTAGTTTTTATTTGTAAAGTTAAGCAAAAATTATGTTGTTTGCTGAGAAAGTTTAGATACAAAACTGAATTTTTAGATACATTAGATACAAAACTGAGTGTTTAAGGTTTATTGCTTTTTTAATATTGATTACAACGCCATACAAGAATGTAAAGACTACTGTGGGCAAAGAGTAGCGTCATTGCTATTCCAACCAATAACTTCATTTTTATTCTCCTTCTCTAGCCATTCCATCAGAGGTTGGAAATATTCGAGAGCAGGATTGATATCTAAATCATCTGTCTCACCATTTGTCATTAT…	100.000	650	1.0;903.206;416.915;20.7057;NA;NA;NA;tr|A0A1W7RB55|A0A1W7RB55_9SCOR	621; Angiotensin-converting enzyme OS=Hadrurus spadix OX=141984 PE=3 SV=1;73.065	620	0.0;Orbitrapmatches	Transcriptome;Insolution_Sp9Female	TRINITY_DN1233_c0_g1_i1:True:151	100.000	621	1.0;Transcriptome_Sp9Female	TRINITY_DN1233_c0_g1_i2:True:81	100.000	621	1.0;NA;NA;15;602;69619.4468;NA;NA
Uncharacterized Venom Compound Ei3;Other;Male	Absence;Signal Peptide	CS pos: 16-17. Pr: 0.9871	0.9871;Stop codon present;14	Digestion Sp2;74	276.85;11	100.60;NA;NA;>TRINITY_DN5878_c0_g2_i1:True:327;;GCAGAATGTCTACAGCTTCTGGCCCCTATGCGACGGCCTACCATGCATACATCTATTTACGCCACTGACATGGGCACGTTTTAAAAGTAAATACGCATTGACTAACATTGCGCTAAATGTAACAGATACAATAAGTTTTTATTCGCCGAGCTCTCTGACAAATTAATGATGCAACATCCTCGATTTGCGTCATCGCTTGTCAAGACAGAAATGGGCGTGATTTATGGTATCTTCTCACCAATAAACAAAATTCTTCTTTATAAGACGTGCGAAAACGGTAGAGATTACACAGTTGTGGGAGTAGCTTGACGCTGGTGTAGTTTGTGATACACAGAGATGTATACTTTGTGC…	95.594	522	1.0;619.85;NA;5.18159;tr|A0A1V9XDV1|A0A1V9XDV1_9ACAR	1324; Non-specific serine/threonine protein kinase OS=Tropilaelaps mercedesae OX=418985 GN=BIW11_10830 PE=4 SV=1;26.705	176	3.25e-07;tr|V5HSZ7|V5HSZ7_IXORI	462; Putative membrane glycoprotein lig-1 OS=Ixodes ricinus OX=34613 PE=2 SV=1;31.614	446	1.04e-42;;Insolution_Sp9Female	TRINITY_DN60396_c0_g1_i1:True:0	38.017	121	0.23314065510597304;Transcriptome_Sp9Female	TRINITY_DN10254_c0_g1_i1:False:1127	99.020	306	0.5895953757225434;GO:0005515: protein binding (molecular_function);SUPERFAMILY	L domain-like	7.23E-42| ProSiteProfiles	Leucine-rich repeat profile.	PS51450	7.057| ProSiteProfiles	Leucine-rich repeat profile.	PS51450	6.919| PRINTS	Leucine-rich repeat signature	PR00019	1.4E-5| PRINTS	Leucine-rich repeat signature	PR00019	1.4E-5| ProSiteProfiles	Leucine-rich repeat profile.	PS51450	6.495| Pfam	Leucine Rich repeat	PF13516	0.54| SUPERFAMILY	RNI-like	SSF52047	2.12E-29| Pfam	Leucine Rich Repeat	PF00560	0.19| ProSiteProfiles
Uncharacterized Venom Compound Ei4;Enzyme;Male	Absence;Signal Peptide	CS pos: 22-23. Pr: 0.9766	0.9766;Stop codon present;20	Digestion Sp2;51	251.02;3	60.94;NA;NA;>TRINITY_DN45_c1_g1_i12:True:26;;ATATATAATAGGTTACGTCATCATAAGATCTATGTCTTGCCTTTGTTGTTCATCCAAGAAATTTTAGTTGTTGTGTCAACGCGAAATTATATCCGCTGGTCATGTGGACCATTCGCTATTATCTACTAGTTTCGGTTTTCGCGTTCCCGGAAAGACAAGTTTCCTCAGAACTGATTTCAAATGAAACTCGAGCGTGGAAATTTCTATTTGATATCGATGAAATATCTACTTACGGCTGCAAGACTGGAAATTTCTCCAGTTTGGACTTGACTACACAGAACTTTTCTTGGCAAAACTTTTCTGATCCTTTATTGAAAAGAGCCTTTAATCTAACAGCACAAGCAGAAACTGTTG…	37.044	548	0.8430769230769231;405.56;NA;20.7057;NA;NA;NA;tr|A0A1W7RA12|A0A1W7RA12_9SCOR	523; Angiotensin-converting enzyme OS=Hadrurus spadix OX=141984 PE=3 SV=1;45.611	524	2.45e-176;;Insolution_Sp9Female	TRINITY_DN1669_c0_g1_i1:False:1916	94.128	596	1.0;Transcriptome_Sp9Female	TRINITY_DN1669_c0_g1_i1:False:1916	94.128	596	1.0;NA;NA;10;574;68090.39772;NA;NA
Uncharacterized Venom Compound Ei5;Enzyme;Male	Absence;Signal Peptide	CS pos: 22-23. Pr: 0.9766	0.9766;Stop codon present;22	Digestion Sp2;48	242.51;3	60.94;NA;NA;>TRINITY_DN45_c1_g1_i10:True:26;;ATATATAATAGGTTACGTCATCATAAGATCTATGTCTTGCCTTTGTTGTTCATCCAAGAAATTTTAGTTGTTGTGTCAACGCGAAATTATATCCGCTGGTCATGTGGACCATTCGCTATTATCTACTAGTTTCGGTTTTCGCGTTCCCGGAAAGACAAGTTTCCTCAGAACTGATTTCAAATGAAACTCGAGCGTGGAAATTTCTATTTGATATCGATGAAATATCTACTTACGGCTGCAAGACTGGAAATTTCTCCAGTTTGGACTTGACTACACAGAACTTTTCTTGGCAAAACTTTTCTGATCCTTTATTGAAAAGAGCCTTTAATCTAACAGCGCAAAAAGAAACTGTCA…	36.861	548	0.8430769230769231;250.221;NA;20.7057;NA;NA;NA;tr|A0A1W7RA12|A0A1W7RA12_9SCOR	523; Angiotensin-converting enzyme OS=Hadrurus spadix OX=141984 PE=3 SV=1;45.611	524	1.02e-177;;Insolution_Sp9Female	TRINITY_DN1669_c0_g1_i1:False:1916	92.114	596	1.0;Transcriptome_Sp9Female	TRINITY_DN1669_c0_g1_i1:False:1916	92.114	596	1.0;NA;NA;11;574;67864.20653;NA;NA
Uncharacterized Venom Compound Ei6;Enzyme;Male	Absence;Signal Peptide	CS pos: 22-23. Pr: 0.9766	0.9766;Stop codon present;23	Digestion Sp2;54	242.48;3	60.94;NA;NA;>TRINITY_DN45_c1_g1_i8:True:26;;ATATATAATAGGTTACGTCATCATAAGATCTATGTCTTGCCTTTGTTGTTCATCCAAGAAATTTTAGTTGTTGTGTCAACGCGAAATTATATCCGCTGGTCATGTGGACCATTCGCTATTATCTACTAGTTTCGGTTTTCGCGTTCCCGGAAAGACAAGTTTCCTCAGAACTGATTTCAAATGAAACTCGAGCGTGGAAATTTCTATTTGATATCGATGAAATATCTACTTACGGCTGCAAGACTGGAAATTTCTCCAGTTTGGACTTGACTACACAGAACTTTTCTTGGCAAAACTTTTCTGATCCTTTATTGAAAAGAGCCTTTAATCTAACAGCGCAAAAAGAAACTGTCAC…	38.321	548	0.8430769230769231;513.685;NA;20.7057;NA;NA;NA;tr|A0A1W7RA12|A0A1W7RA12_9SCOR	523; Angiotensin-converting enzyme OS=Hadrurus spadix OX=141984 PE=3 SV=1;44.466	524	3.46e-171;;Insolution_Sp9Female	TRINITY_DN1669_c0_g1_i1:False:1916	92.282	596	1.0;Transcriptome_Sp9Female	TRINITY_DN1669_c0_g1_i1:False:1916	92.282	596	1.0;NA;NA;10;574;67730.08511;NA;NA
Uncharacterized Venom Compound Ei7;Enzyme;Male	Absence;Signal Peptide	CS pos: 22-23. Pr: 0.9766	0.9766;Stop codon present;24	Digestion Sp2;52	239.93;3	60.94;NA;NA;>TRINITY_DN45_c1_g1_i13:True:26;;ATATATAATAGGTTACGTCATCATAAGATCTATGTCTTGCCTTTGTTGTTCATCCAAGAAATTTTAGTTGTTGTGTCAACGCGAAATTATATCCGCTGGTCATGTGGACCATTCGCTATTATCTACTAGTTTCGGTTTTCGCGTTCCCGGAAAGACAAGTTTCCTCAGAACTGATTTCAAATGAAACTCGAGCGTGGAAATTTCTATTTGATATCGATGAAATATCTACTTACGGCTGCAAGACTGGAAATTTCTCCAGTTTGGACTTGACTACACAGAACTTTTCTTGGCAAAACTTTTCTGATCCTTTATTGAAAAGAGCCTTTAATCTAACAGCACAAGCAGAAACTGTTG…	38.321	548	0.8430769230769231;0;NA;20.7057;NA;NA;NA;tr|A0A1W7RA12|A0A1W7RA12_9SCOR	523; Angiotensin-converting enzyme OS=Hadrurus spadix OX=141984 PE=3 SV=1;44.656	524	2.63e-172;;Insolution_Sp9Female	TRINITY_DN1669_c0_g1_i1:False:1916	90.101	596	1.0;Transcriptome_Sp9Female	TRINITY_DN1669_c0_g1_i1:False:1916	90.101	596	1.0;NA;NA;10;574;67722.13818;NA;NA
Uncharacterized Venom Compound Ei8;Enzyme;Male	Absence;Signal Peptide	CS pos: 22-23. Pr: 0.9766	0.9766;No Stop codon present;27	Digestion Sp2;51	237.63;4	60.94;NA;NA;>TRINITY_DN45_c1_g1_i6:True:26;;ATATATAATAGGTTACGTCATCATAAGATCTATGTCTTGCCTTTGTTGTTCATCCAAGAAATTTTAGTTGTTGTGTCAACGCGAAATTATATCCGCTGGTCATGTGGACCATTCGCTATTATCTACTAGTTTCGGTTTTCGCGTTCCCGGAAAGACAAGTTTCCTCAGAACTGATTTCAAATGAAACTCGAGCGTGGAAATTTCTATTTGATATCGATGAAATATCTACTTACGGCTGCAAGACTGGAAATTTCTCCAGTTTGGACTTGACTACACAGAACTTTTCTTGGCAAAACTTTTCTGATCCTTTATTGAAAAGAGCCTTTAATCTAACAGCACAAGCAGAAACTGTTGT…	35.010	477	0.7338461538461538;47.6556;NA;20.7057;NA;NA;NA;tr|A0A1W7RA12|A0A1W7RA12_9SCOR	523; Angiotensin-converting enzyme OS=Hadrurus spadix OX=141984 PE=3 SV=1;45.802	524	2.11e-180;;Insolution_Sp9Female	TRINITY_DN1669_c0_g1_i2:False:1916	93.714	525	1.0;Transcriptome_Sp9Female	TRINITY_DN1669_c0_g1_i2:False:1916	93.714	525	1.0;NA;NA;10;503;59614.3305;NA;NA
Uncharacterized Venom Compound Ei9;Enzyme;Male	Absence;Signal Peptide	CS pos: 22-23. Pr: 0.9766	0.9766;No Stop codon present;29	Digestion Sp2;52	236.08;4	60.94;NA;NA;>TRINITY_DN45_c1_g1_i4:True:26;;ATATATAATAGGTTACGTCATCATAAGATCTATGTCTTGCCTTTGTTGTTCATCCAAGAAATTTTAGTTGTTGTGTCAACGCGAAATTATATCCGCTGGTCATGTGGACCATTCGCTATTATCTACTAGTTTCGGTTTTCGCGTTCCCGGAAAGACAAGTTTCCTCAGAACTGATTTCAAATGAAACTCGAGCGTGGAAATTTCTATTTGATATCGATGAAATATCTACTTACGGCTGCAAGACTGGAAATTTCTCCAGTTTGGACTTGACTACACAGAACTTTTCTTGGCAAAACTTTTCTGATCCTTTATTGAAAAGAGCCTTTAATCTAACAGCACAAGCAGAAACTGTTGT…	35.639	477	0.7338461538461538;13.0956;NA;20.7057;NA;NA;NA;tr|A0A1W7RA12|A0A1W7RA12_9SCOR	523; Angiotensin-converting enzyme OS=Hadrurus spadix OX=141984 PE=3 SV=1;45.420	524	6.97e-177;;Insolution_Sp9Female	TRINITY_DN1669_c0_g1_i1:False:1916	92.952	525	1.0;Transcriptome_Sp9Female	TRINITY_DN1669_c0_g1_i1:False:1916	92.952	525	1.0;NA;NA;9;503;59943.48461;NA;NA
Uncharacterized Venom Compound Ei10;Enzyme;Male	Absence;Signal Peptide	CS pos: 22-23. Pr: 0.9766	0.9766;Stop codon present;31	Digestion Sp2;47	233.35;3	60.94;NA;NA;>TRINITY_DN45_c1_g1_i7:True:26;;ATATATAATAGGTTACGTCATCATAAGATCTATGTCTTGCCTTTGTTGTTCATCCAAGAAATTTTAGTTGTTGTGTCAACGCGAAATTATATCCGCTGGTCATGTGGACCATTCGCTATTATCTACTAGTTTCGGTTTTCGCGTTCCCGGAAAGACAAGTTTCCTCAGAACTGATTTCAAATGAAACTCGAGCGTGGAAATTTCTATTTGATATCGATGAAATATCTACTTACGGCTGCAAGACTGGAAATTTCTCCAGTTTGGACTTGACTACACAGAACTTTTCTTGGCAAAACTTTTCTGATCCTTTATTGAAAAGAGCCTTTAATCTAACAGCGCAAAAAGAAACTGTCAC…	37.409	548	0.8430769230769231;117.379;NA;20.7057;NA;NA;NA;tr|A0A1W7RA12|A0A1W7RA12_9SCOR	523; Angiotensin-converting enzyme OS=Hadrurus spadix OX=141984 PE=3 SV=1;45.229	524	1.16e-174;;Insolution_Sp9Female	TRINITY_DN1669_c0_g1_i1:False:1916	92.953	596	1.0;Transcriptome_Sp9Female	TRINITY_DN1669_c0_g1_i1:False:1916	92.953	596	1.0;NA;NA;10;574;68159.41268;NA;NA
Uncharacterized Venom Compound Ei11;Enzyme;Male	Absence;Signal Peptide	CS pos: 22-23. Pr: 0.9766	0.9766;Stop codon present;32	Digestion Sp2;38	231.37;3	60.94;NA;NA;>TRINITY_DN45_c1_g1_i11:True:26;;ATATATAATAGGTTACGTCATCATAAGATCTATGTCTTGCCTTTGTTGTTCATCCAAGAAATTTTAGTTGTTGTGTCAACGCGAAATTATATCCGCTGGTCATGTGGACCATTCGCTATTATCTACTAGTTTCGGTTTTCGCGTTCCCGGAAAGACAAGTTTCCTCAGAACTGATTTCAAATGAAACTCGAGCGTGGAAATTTCTATTTGATATCGATGAAATATCTACTTACGGCTGCAAGACTGGAAATTTCTCCAGTTTGGACTTGACTACACAGAACTTTTCTTGGCAAAACTTTTCTGATCCTTTATTGAAAAGAGCCTTTAATCTAACAGCACAAGCAGAAACTGTTG…	36.630	546	0.84;46.498;NA;20.7057;NA;NA;NA;tr|A0A1W7RA12|A0A1W7RA12_9SCOR	523; Angiotensin-converting enzyme OS=Hadrurus spadix OX=141984 PE=3 SV=1;46.565	524	3.93e-178;;Insolution_Sp9Female	TRINITY_DN1669_c0_g1_i1:False:1916	88.591	596	1.0;Transcriptome_Sp9Female	TRINITY_DN1669_c0_g1_i1:False:1916	88.591	596	1.0;NA;NA;11;574;68327.5575;NA;NA
Uncharacterized Venom Compound Ei12;Enzyme;Unspecific;Signal Peptide	CS pos: 19-20. Pr: 0.6285	0.6285;Stop codon present;34	Digestion Sp2;77	230.08;10	107.35;84	242.32;11	85.28;>TRINITY_DN8382_c0_g1_i2:False:1093;>TRINITY_DN4_c0_g1_i7:False:1073;TTTTTTTTTTACCAGTAACAACGTATATTCTTCTACATTTATTTCATGCCAGCTCAAAGATTAAACAGTTTGTACATTCGAAAGATCAAATAAAATTGGTGTTTATGATATTGACATTTTATTACACATATAGTCAAAATTTGAAAGATTTCTTAATACGCTTTCTTTTACTTTTTCCAACAAATTTCTTGATCGCTTATAGTACTCTTAACCCATTGGGCGTAATAAGCGATATCTGTGTACATAGCAGGAGAGTCATTGCCTTCAACGCACCAATCAAAGTAATCGAAGGAAACAATTCCAATAGCCATTGTATTTTGTCCA…	100.000	286	1.0;6523.72;45188.3;11.0768;tr|A0A6P8J9F5|A0A6P8J9F5_ACTTE	327; chymotrypsinogen A-like OS=Actinia tenebrosa OX=6105 GN=LOC116308146 PE=4 SV=1;26.545	275	7.63e-22;tr|A0A1W7R9I5|A0A1W7R9I5_9SCOR	283; Serine proteinase OS=Hadrurus spadix OX=141984 PE=4 SV=1;64.184	282	3.18e-134;Orbitrapmatches	Transcriptome;Insolution_Sp9Female	TRINITY_DN4_c0_g1_i7:False:1073	100.000	282	1.0;Transcriptome_Sp9Female	TRINITY_DN4_c0_g1_i7:False:1073	100.000	282	1.0;NA;NA;10;263;28842.937;NA;NA
Uncharacterized Venom Compound Ei13;Other;Male	Expressionlevel;Signal Peptide	CS pos: 20-21. Pr: 0.9813	0.9813;Stop codon present;36	Digestion Sp2;80	222.87;6	36.96;16	49.45;NA;>TRINITY_DN27610_c0_g1_i1:False:686;>TRINITY_DN39370_c0_g1_i1:True:38;TTTTTTTTTTTTTGTTTAGTAATTCTTTATTGTAAATTTTAATTATTAGTACTTAAAGTTAATCCTATGTGCGCAACAAAAAGTTACTTTAAAACAATGGACACATTAAAGCAAGTGCAATCTGTTTCTAATGCAGAAAATCCAACTTTTTTTTTCAGCTGTTCAACACTCTATGCCAGTATTATTTTGACCACCGTAGAGAGTCTGAAATAAATAACAAACAACTTGCACTTTTTCTTCGGTATTATTTTTGCAATCGTCTACTACAGATTTTATATAGTCCCTCGTATATCTACCGCATCCATCCTCAGAGTCAGGAA…	165; Venom protein OS=Hadrurus spadix OX=141984 PE=4 SV=1;46.667	165	2.63e-47;Orbitrapmatches	Transcriptome;Insolution_Sp9Female	TRINITY_DN39370_c0_g1_i1:True:38	100.000	172	1.0;Transcriptome_Sp9Female	TRINITY_DN39370_c0_g1_i1:True:38	100.000	172	1.0;NA;NA;14;152;17677.28375;NA;NA
Uncharacterized Venom Compound Ei14;Enzyme;Unspecific;Signal Peptide	CS pos: 21-22. Pr: 0.9751	0.9751;Stop codon present;37	Digestion Sp2;55	221.16;10	127.41;34	144.61;5	82.88;>TRINITY_DN221_c0_g1_i1:True:151;>TRINITY_DN43054_c0_g1_i1:False:2225;GTCGTTTCGGATCAATTATACGACTTCGTACAGTCGGGAAATCAGATAAATCATTCCGATTACATCGTAAACCGTAGTTCCGCAGGTGGATAGTGACGTCATTTTCACAATGTCTAAACCACCAATCCCACGAGTATATAATGTATTGTAGTCCCTCCGTAACAGCCACAGACGGATAAAATTAGGATTCTGTACACGCGCCGTAGTACTAATGACTTCATATTTATTAGTGATAATAATCGCGGTTTTATTTATATGCCATTGTACTCGATCGATCGTGAGCGATCATTTCACCAATCAATGGATCGTTAGGACCCACGGTG…	59.477	612	0.8730385164051355;240.376;101.725;50.7315;NA;NA;NA;tr|A0A087UV31|A0A087UV31_STEMI	632; Neuroendocrine convertase 1 (Fragment) OS=Stegodyphus mimosarum OX=407821 GN=X975_09608 PE=3 SV=1;59.200	625	0.0;Orbitrapmatches	Transcriptome;Insolution_Sp9Female	TRINITY_DN43054_c0_g1_i1:False:2225	99.694	654	1.0;Transcriptome_Sp9Female	TRINITY_DN43054_c0_g1_i1:False:2225	99.694	654	1.0;NA;NA;9;633;70763.61895;NA;NA
Uncharacterized Venom Compound Ei15;Enzyme;Male	Absence;Signal Peptide	CS pos: 22-23. Pr: 0.9766	0.9766;Stop codon present;44	Digestion Sp2;33	207.6;3	60.94;NA;NA;>TRINITY_DN45_c1_g1_i14:True:26;;ATATATAATAGGTTACGTCATCATAAGATCTATGTCTTGCCTTTGTTGTTCATCCAAGAAATTTTAGTTGTTGTGTCAACGCGAAATTATATCCGCTGGTCATGTGGACCATTCGCTATTATCTACTAGTTTCGGTTTTCGCGTTCCCGGAAAGACAAGTTTCCTCAGAACTGATTTCAAATGAAACTCGAGCGTGGAAATTTCTATTTGATATCGATGAAATATCTACTTACGGCTGCAAGACTGGAAATTTCTCCAGTTTGGACTTGACTACACAGAACTTTTCTTGGCAAAACTTTTCTGATCCTTTATTGAAAAGAGCCTTTAATCTAACAGCGCAAAAAGAAACTGTCA…	37.363	546	0.84;0;NA;20.7057;NA;NA;NA;tr|A0A1W7RA12|A0A1W7RA12_9SCOR	523; Angiotensin-converting enzyme OS=Hadrurus spadix OX=141984 PE=3 SV=1;45.992	524	7.85e-175;;Insolution_Sp9Female	TRINITY_DN1669_c0_g1_i1:False:1916	87.919	596	1.0;Transcriptome_Sp9Female	TRINITY_DN1669_c0_g1_i1:False:1916	87.919	596	1.0;NA;NA;11;574;68365.51904;NA;NA
Uncharacterized Venom Compound Ei16;Enzyme;Male	Absence;Signal Peptide	CS pos: 22-23. Pr: 0.9766	0.9766;Stop codon present;45	Digestion Sp2;32	206.73;3	60.94;NA;NA;>TRINITY_DN45_c1_g1_i2:True:26;;ATATATAATAGGTTACGTCATCATAAGATCTATGTCTTGCCTTTGTTGTTCATCCAAGAAATTTTAGTTGTTGTGTCAACGCGAAATTATATCCGCTGGTCATGTGGACCATTCGCTATTATCTACTAGTTTCGGTTTTCGCGTTCCCGGAAAGACAAGTTTCCTCAGAACTGATTTCAAATGAAACTCGAGCGTGGAAATTTCTATTTGATATCGATGAAATATCTACTTACGGCTGCAAGACTGGAAATTTCTCCAGTTTGGACTTGACTACACAGAACTTTTCTTGGCAAAACTTTTCTGATCCTTTATTGAAAAGAGCCTTTAATCTAACAGCGCAAAAAGAAACTGTCAC…	37.729	546	0.84;63.6444;NA;20.7057;NA;NA;NA;tr|A0A1W7RA12|A0A1W7RA12_9SCOR	523; Angiotensin-converting enzyme OS=Hadrurus spadix OX=141984 PE=3 SV=1;45.420	524	4.99e-173;;Insolution_Sp9Female	TRINITY_DN1669_c0_g1_i1:False:1916	84.732	596	1.0;Transcriptome_Sp9Female	TRINITY_DN1669_c0_g1_i1:False:1916	84.732	596	1.0;NA;NA;11;574;67974.29895;NA;NA
Uncharacterized Venom Compound Ei17;Enzyme;Unspecific;Signal Peptide	CS pos: 18-19. Pr: 0.9819	0.9819;Stop codon present;48	Digestion Sp2;71	197.87;NA;60	146.99;NA;>TRINITY_DN3066_c0_g1_i1:True:88;>TRINITY_DN2569_c0_g1_i2:True:39;ACCCACGAGCGGAGCAGCTAAATTAGCAAGCGTCGTGGAATGAAGCTAACGATGACGTAGCATATGGTAATTTTTGCCAATCGCCTGAGTTCGAGACAAGACAAGACAGATTATCTTACGCGCAATTATTTTGTGGATTAAAGTGGAGAAAATGTATGTGTTAGCTGTAGCTATAATATTAGCGTTGTTTTGTAAATTGGAAGCGAGATCACATTATGAAGCCGATAAATATTGGTACGACAAACTTCAAGGCTTAGAATTAAGAAAGAACAACAAATTCTTTGGATTACAAAATGAAGGAATAATACAAGAAGTAATTGGTT…	100.000	382	1.0;43.6175;20.951;27.4443;NA;NA;NA;tr|A0A7S8MUD5|A0A7S8MUD5_TITSE	402; Peptidylamidoglycolate lyase OS=Tityus serrulatus OX=6887 PE=2 SV=1;50.275	364	4.08e-115;Orbitrapmatches	Transcriptome;Insolution_Sp9Female	TRINITY_DN2569_c0_g1_i2:True:39	100.000	361	1.0;Transcriptome_Sp9Female	TRINITY_DN2569_c0_g1_i2:True:39	100.000	361	1.0;NA;NA;4;343;38754.32952;NA;NA
Uncharacterized Venom Compound Ei18;Other;Unspecific;Signal Peptide	CS pos: 20-21. Pr: 0.9841	0.9841;Stop codon present;49	Digestion Sp2;35	197.81;NA;14	103.74;NA;>TRINITY_DN38086_c0_g1_i1:False:2306;>TRINITY_DN47485_c0_g1_i1:False:2297;TTTTTTTTTTAATTTAATTAAAGGAGTTTTATTTTTCATAAGTAAATTCATACAACATACGTAGCAATGATTGATATAATACACCCAATTTAAAACTAGAATTTATCAAGAGTTTCAAACTCAAAAGCAATAAACATATCACAGTGTGCAAATATTTGGATCGGTTAATTCAACTGCCTTGAAATAATTTTCACCAAGTGCATCAATGTAGGTGGAATCAAATTTAGTGGCACGAAGGCTACTTGTAGAGTCTTTGAAAAGCAAGTCAGACTTTCCTTCATAAGGTTTAAAAGCATTAAAGTTCGGAGATGTCGT…	99.861	722	0.9796472184531886;294.78;387.553;314.204;sp|K9IMD0|TRLF_DESRO	709; Lactotransferrin OS=Desmodus rotundus OX=9430 GN=LTF PE=1 SV=1;33.242	728	5.42e-90;tr|A0A1W7R9D1|A0A1W7R9D1_9SCOR	711; Transferrin OS=Hadrurus spadix OX=141984 PE=3 SV=1;74.366	710	0.0;Orbitrapmatches	Transcriptome;Insolution_Sp9Female	TRINITY_DN47485_c0_g1_i1:False:2297	99.859	710	1.0;Transcriptome_Sp9Female	TRINITY_DN47485_c0_g1_i1:False:2297	99.859	710	1.0;GO:0005576: extracellular region (cellular_component)| GO:0005615: extracellular space (cellular_component);Gene3D	-	2.6E-58| SMART	transfer-fin	SM00094	1.6E-124| SMART	transfer-fin	SM00094	3.3E-44| CDD	PBP2_transferrin	cd13529	1.95138E-100| Gene3D	-	G3DSA:3.40.190.10	7.0E-110| Gene3D	-	G3DSA:3.40.190.10	2.6E-58| SUPERFAMILY	Periplasmic binding protein-like II	SSF53850	1.66E-99| Gene3D	-	G3DSA:3.40.190.10	7.0E-110| PANTHER	TRANSFERRIN	PTHR11485	1.2E-163| PANTHER
Uncharacterized Venom Compound Ei19;Other;Female	Expressionlevel;Signal Peptide	CS pos: 24-25. Pr: 0.9824	0.9824;Stop codon present;51	Digestion Sp2;65	196.01;NA;78	229.02;19	88.52;>TRINITY_DN257_c0_g1_i1:False:1897;>TRINITY_DN113_c0_g2_i2:False:1277;GGCGCAAACAGTTTTTATGAAGCAAGTAGCGCCACCAAACAGTAGTGGCAGGTTGGTGCAGCAACCCGGGAACAAAAGTTTGAGACATATATTTTTGGAGTTTCTGTGATAATTGCCAGTTTAACGTAACTTAACGTAACGTAACGTTTAACGTAACAATCTACTTGTGGAAAAAATACCAAAAAAATTAAATATTTAAATACAAATTTATTGATGTAACTATTTGTCTCCAAGTTTTTCGCTCCTGGAAAATTTTCTGCGGACGACTGGCACCCTACAGGTTCAAATGATGCCGGATTAGAAATGGCTGACCTGTATAGGTA…	38.645	251	1.0244897959183674;588.33;11449.7;11.6328;tr|R7U8K0|R7U8K0_CAPTE	1967; Uncharacterized protein OS=Capitella teleta OX=283909 GN=CAPTEDRAFT_199677 PE=4 SV=1;25.275	182	9.56e-08;tr|A0A1W7RAR3|A0A1W7RAR3_9SCOR	241; Pentaxin OS=Hadrurus spadix OX=141984 PE=3 SV=1;36.555	238	4.96e-37;Orbitrapmatches	Transcriptome;Insolution_Sp9Female	TRINITY_DN113_c0_g2_i1:False:1339	100.000	240	1.0;Transcriptome_Sp9Female	TRINITY_DN113_c0_g2_i2:False:1277	100.000	240	1.0;NA;Gene3D	-	2.1E-28| SUPERFAMILY	Concanavalin A-like lectins/glucanases	SSF49899	3.17E-21| Pfam	Pentaxin family	PF00354	6.0E-16| ProSiteProfiles	Pentraxin (PTX) domain profile.	PS51828	21.01| PANTHER	PENTRAXIN	PTHR19277	7.6E-18| SMART	PTX_2	SM00159	2.0E-7;5;216;24631.68299;NA;NA
Uncharacterized Venom Compound Ei20;Enzyme;Unspecific;Signal Peptide	CS pos: 20-21. Pr: 0.9740	0.9740;Stop codon present;55	Digestion Sp2;37	189.14;9	142.82;18	114.47;NA;>TRINITY_DN237_c0_g1_i1:True:292;>TRINITY_DN58068_c0_g1_i1:True:274;CTTTACTGCCGGGACGATATTTCCAAATGACTATAGAGGCTCTACGTGAAATTCCCACCAAAAAAGGTAGACGTAAAAATCGTAATAATTATTGCTAGAAACACCTGTTGGATACACAGCATTTGTGGCGCTGTCGACAAGTGCTGACGTCAGGGCCACGATGTGGGAGATCGGCAGCTGTTTGAAACAGAGCTTTCTAAACAGCGAGTCGAGAGATATGGAGCACTTAAGCTTGGGGTTTACAACTCCCACCGTCCTACAGTTCTCTATCCGAGCAAACTACTCGGAATAACTGCTTTTCTTCGCTTCCGTACGACTAGT…	99.857	701	1.0;331.688;125.259;50.7315;tr|A0A6J1TRT3|A0A6J1TRT3_9SAUR	307; collectin-11 isoform X2 OS=Notechis scutatus OX=8663 GN=COLEC11 PE=3 SV=1;36.364	55	0.075;tr|A0A1W7RA47|A0A1W7RA47_9SCOR	699; Neuroendocrine convertase 1 OS=Hadrurus spadix OX=141984 PE=3 SV=1;87.249	698	0.0;Orbitrapmatches	Transcriptome;Insolution_Sp9Female	TRINITY_DN58068_c0_g1_i1:True:274	99.855	691	1.0;Transcriptome_Sp9Female	TRINITY_DN58068_c0_g1_i1:True:274	99.855	691	1.0;NA;NA;13;671;75243.42431;NA;NA
Uncharacterized Venom Compound Ei21;Enzyme;Unspecific;Signal Peptide	CS pos: 13-14. Pr: 0.9816	0.9816;Stop codon present;56	Digestion Sp2;34	187.39;NA;57	174.42;NA;>TRINITY_DN10_c0_g1_i1:False:2132;>TRINITY_DN1861_c2_g1_i2:True:1;CAGCGTTTCAAATTTGCATTTATTTTGCTCACAGATACTATGTATGTCTATCTGTTCTCAAGTTCAGTGTGCATTAGCTGTTATAATTATTATTTGTATTGATTTGGTGAATTTTATACTATATTAAATATTTTACCACAGATTATTGGATTGTTTATGCGATATAATTACATTTATAGATGTCAGTTTACATAGAGCGAAAACAAATCTTATGTTTTAAGTCAGTTACAAACAAATCGTTGGATCTTTATATTCCCACCCAACAGGAGTATCTTTGTTCCAAATTATCAACCAATCCAAAAGAGGCTGGAAGAACTCTAGAA…	100.000	359	1.0;294.632;937.872;1.77462;NA;NA;NA;tr|A0A4Y2HGM0|A0A4Y2HGM0_ARAVE	627; Angiotensin-converting enzyme OS=Araneus ventricosus OX=182803 GN=ACE_6 PE=3 SV=1;45.924	503	2.17e-162;Orbitrapmatches	Transcriptome;Insolution_Sp9Female	TRINITY_DN1861_c2_g1_i2:True:1	100.000	599	1.0;Transcriptome_Sp9Female	TRINITY_DN1861_c2_g1_i2:True:1	100.000	599	1.0;NA;NA;10;586;68857.46767;NA;NA
Uncharacterized Venom Compound Ei22;Other;Male	ExpressionlevelFemale	MALDI;Signal Peptide	CS pos: 18-19. Pr: 0.9832	0.9832;Stop codon present;68	Digestion Sp2;33	171.54;52	292.77;11	79.40;33	241.65;>TRINITY_DN1227_c0_g2_i1:False:1689;>TRINITY_DN5490_c0_g1_i2:True:11;ATAACACTTACTACTCAGGAACAAGCCAAAAATAAAAATTTGTTACATAGTGTTATTTATATTATTTAATTACTCTTCTGTCTTTTTATACGTAGATCTATAAAATATACGCGCTATTTTCGTAGGAAATGTCGCTGCAAAGATTAGAGACTACCGATATTTTGAAAATGTGCCAAATTTTTTCATTCTATTTTACGAACGTTTTCTTAATACAGTGTTGACCTACGTAATAAGAAAATGATGTATATATTAGGTTCTACGCATTATAGTATATTATAATTCGAGCCAAACGATCGACGAGTGCTGTTCGCTAATCCCAAAAA…	99.419	172	1.0;1265.09;89.3321;4.14821;NA;NA;NA;tr|A0A0U1TZ84|A0A0U1TZ84_ISOMC	166; Uncharacterized protein (Fragment) OS=Isometrus maculatus OX=497827 PE=2 SV=1;46.429	140	1.85e-24;Orbitrapmatches	Transcriptome;Insolution_Sp9Female	TRINITY_DN5490_c0_g1_i1:True:11	99.405	168	1.0;Transcriptome_Sp9Female	TRINITY_DN5490_c0_g1_i2:True:11	99.405	168	1.0;NA;NA;0;150;17560.89858;Mass: 2229.05197 (WMDSDSLVRRRYWSPFE)	PTMs: A	Mass: 2229.05197 (WMDSDSLVRRRYWSPFE)	PTMs: A	Mass: 2057.86565 (SGGPGDFDQIDRVGFNDFD)	PTMs:;Mass: 2229.05197 (WMDSDSLVRRRYWSPFE)	PTMs: A	Mass: 2229.05197 (WMDSDSLVRRRYWSPFE)	PTMs: A	Mass: 2057.86565 (SGGPGDFDQIDRVGFNDFD)	PTMs:
Uncharacterized Venom Compound Ei23;Enzyme;Unspecific;Signal Peptide	CS pos: 16-17. Pr: 0.9818	0.9818;Stop codon present;69	Digestion Sp2;30	170.68;NA;NA;NA;>TRINITY_DN209_c0_g1_i1:False:1599;>TRINITY_DN603_c0_g1_i2:True:200;TTTTTTTTTTCATATCGATCCATCTTTGTGTTTTATTTAATTTGTAGTAAAACAATACATAATTTTAATATGAGGCATAATGAATCAGATAACGTATATATTCCCAAAAATTCTCTCTATATACAAAAGTCTTAATTTTTAAGCGAAGTGAATTGTAACAGGAAAACGTGATTTTGTTACGTTACGTAAAGACATATCATTTGTTATGATAATTAGAGTCAGACATTTTCAGCACCCACGCATACGGACTAGGAAGCAAGTCGGGTGTCAGGAGAGGAAAATAAACTTGAATCCCTTTATTTTCTGTAGATTTCC…	98.715	467	1.0;72.982;15.5469;30.4088;NA;NA;NA;tr|A0A1W7RAH0|A0A1W7RAH0_9SCOR	452; Alpha-L-fucosidase OS=Hadrurus spadix OX=141984 PE=3 SV=1;83.333	450	0.0;Orbitrapmatches	Transcriptome;Insolution_Sp9Female	TRINITY_DN603_c0_g1_i2:True:200	98.891	451	1.0;Transcriptome_Sp9Female	TRINITY_DN603_c0_g1_i2:True:200	98.891	451	1.0;NA;NA;3;435;50503.07813;NA;NA
Uncharacterized Venom Compound Ei24;Enzyme;Male	Absence;Signal Peptide	CS pos: 21-22. Pr: 0.9813	0.9813;Stop codon present;75	Digestion Sp2;47	163.06;31	123.55;NA;NA;>TRINITY_DN164_c0_g1_i11:False:5156;;CGGTAAACAAAGTGTTCTGGCAGACCATCCGTCGCCTTTGAGGTAAGAAGTCGTGTACAACTAGAACTGTAAAAAGTTTGAATGACACACTTCTGACCAAGGAGGAGGATATTCTTGAGAGGTGGAGGGAACACTTTAACACTCTTCTTAATCCAGTTACTGCAAAACACGAAGACAATCATGTGGTGCATTTTGGGACAGAATCTAATCTTACTGAAGCTGAAGTTGAGATGGCAATTAAATCTCTCAAACCAGGCAAGGCTGCTGGTGAAGATGAAATTCGTCCTGAAATGCTGAAAGCCTTAAACAGAGATGGCATCCGTTGGCTTACTCGTGTATGTCAGGTTGC…	523; Angiotensin-converting enzyme OS=Hadrurus spadix OX=141984 PE=3 SV=1;46.753	77	1.02e-11;;Insolution_Sp9Female	TRINITY_DN1387_c0_g1_i2:True:0	88.983	118	0.921875;Transcriptome_Sp9Female	TRINITY_DN1387_c0_g1_i2:True:0	88.983	118	0.921875;NA;NA;3;107;12708.48068;NA;NA
Uncharacterized Venom Compound Ei25;Enzyme;Female	Absence;Signal Peptide	CS pos: 22-23. Pr: 0.9318	0.9318;No Stop codon present;76	Digestion Sp2;53	162.36;NA;81	237.26;NA;>TRINITY_DN656_c0_g1_i2:False:355;>TRINITY_DN5487_c0_g1_i3:True:93;CGTGCTTCCAGATTTTGCAATTCCTCTTTAGAAATTTTTTCGTTTACTTTGGCTTCATATTCAATGTAGGATGACATCAATTTAAACGCCCTTTTATATGTAGGTTCACTGTAACTTTCCCAGTTTTCAATCGGTATAGGATCAAAGTTTGGAAGTTTTTTGTTCATACAGGCATCATGTAATTTCTGATTCTGCTTCATCATATACTGAAATTCCGGTGAATCTTGCGATACTAGGCATGATCCAAAAACGCCACTGCTCAGAACATACAACCAAGTTGAAAGAAATAGGTATAGAATTAAACCCATTTCTGTTGGTTTGG…	600; Angiotensin-converting enzyme OS=Hadrurus spadix OX=141984 PE=3 SV=1;45.614	57	4.56e-09;Orbitrapmatches	Transcriptome;Insolution_Sp9Female	TRINITY_DN5487_c0_g1_i4:True:93	100.000	102	1.0;Transcriptome_Sp9Female	TRINITY_DN5487_c0_g1_i3:True:93	100.000	102	1.0;NA;NA;2;80;9493.54697;Mass: 3404.71151 (AFKLMSSYIEYEAKVNEKISKEELQNLEA)	PTMs:	Mass: 3404.71151 (AFKLMSSYIEYEAKVNEKISKEELQNLEA)	PTMs:;NA
Uncharacterized Venom Compound Ei26;Other;Male	Absence;Signal Peptide	CS pos: 23-24. Pr: 0.9814	0.9814;Stop codon present;78	Digestion Sp2;41	160.84;56	192.50;NA;NA;>TRINITY_DN131_c0_g2_i2:True:192;;ATTTATTGTTGTGACAGACTGTTGCCTCCAAAGTCGTAGTTGTTTTGACAATAAAACGAGTTATCCATTAAGCAGTTAAATTTTTATTTCCGAAGACTCTTTCGATTGGAGAGATCTCAAAAGTAAGGACATACGAATAGTATATATGCAGGAGAAGAGATTCTATTTTGTATACAGTGTTTAGTATAATAGTTACACAAACATCATTTCTCTATTCTTCTTGCGAAAATGAAGCGTTACCTGGTAGTCCTGGCTTTTCTGTTAGTGTGCGCAGTGTTGCCAGATCAGACTCGGGGTATTGAAAATGGCGGCGATTTTAACGACGAAGAATTCGCTAGATCTCGCAATTTCT…	465; Metalloendopeptidase OS=Pachycerianthus borealis OX=2736680 PE=2 SV=1;47.826	23	0.008;tr|A0A1B3IJ02|A0A1B3IJ02_9SCOR	79; Venom peptide HtC4Tx1 OS=Hadogenes troglodytes OX=1577150 PE=2 SV=1;56.098	41	4.17e-09;;Insolution_Sp9Female	TRINITY_DN2280_c0_g1_i3:False:293	96.970	66	1.0;Transcriptome_Sp9Female	TRINITY_DN2280_c0_g1_i1:False:293	96.970	66	1.0;NA;NA;4;43;5121.34323;Mass: 3523.6337000000003 (SRNFCRNKCYKKYIPNNCVEYCRDVLGKN)	PTMs: C-C	Mass: 3523.6337000000003 (SRNFCRNKCYKKYIPNNCVEYCRDVLGKN)	PTMs: C-C	Mass: 3523.6337000000003 (SRNFCRNKCYKKYIPNNCVEYCRDVLGKN)	PTMs: C-C	Mass: 3523.6337000000003 (SRNFCRNKCYKKYIPNNCVEYCRDVLGKN)	PTMs: C-C	Mass: 3223.4943500000004 (SRNFCRNKCYKKYIPNNCVEYCRDVL)	PTMs: A	C-C	Mass: 3223.4943500000004 (SRNFCRNKCYKKYIPNNCVEYCRDVL)	PTMs: A	C-C	Mass: 1697.75924 (YIPNNCVEYCRDVL)	PTMs: A	C-C	Mass: 1697.75924 (YIPNNCVEYCRDVL)	PTMs: A	C-C;NA
Uncharacterized Venom Compound Ei27;Other;Female	Expressionlevel;Signal Peptide	CS pos: 24-25. Pr: 0.4919	0.4919;Stop codon present;80	Digestion Sp2;70	159.59;NA;81	198.37;58	93.86;>TRINITY_DN7369_c0_g1_i1:True:152;>TRINITY_DN1749_c0_g1_i1:False:1592;TGATCGAGACTAACATACGTAGTTTCCCATATTCCCATATGTCGCGTGTCCTACCCATTTTATGATGGTGCTTGGAAAAATATTTATAACAGGCACTGGACTATAAAGTCTGCTCAGGTTGTACTGCTGTATTGTATATGTTTGATTTGTAGAAGCAGAATATGAACCCGATAAGTTTAATCTCGCTTTTGAAGATTCTGGTTTTATTGTGTTGCTGCAGTAATGCATTTGCTGAGATAACCGATAATCATTGGCACTTTGTCTGCAGTTCGTCAGATGAAACCATTTTGTATCTAATCGATTGTGCTAATGAGTTAGAAACT…	130; Uncharacterized protein OS=Pandinus cavimanus OX=217261 PE=2 SV=1;42.400	125	1.10e-31;Orbitrapmatches	Transcriptome;Insolution_Sp9Female	TRINITY_DN1749_c0_g1_i1:False:1592	100.000	130	1.0;Transcriptome_Sp9Female	TRINITY_DN1749_c0_g1_i1:False:1592	100.000	130	1.0;NA;NA;6;106;12273.66629;NA;NA
Uncharacterized Venom Compound Ei28;Other;Unspecific;Signal Peptide	CS pos: 23-24. Pr: 0.9828	0.9828;Stop codon present;81	Digestion Sp2;75	159.04;NA;77	122.67;NA;>TRINITY_DN1069_c0_g2_i2:False:1898;>TRINITY_DN1507_c0_g2_i1:True:54;ATCCGTTTGTATAGAAACCACTGCAATAAAAATCATATTTATACCTAAATATATTACTGTAGAAAAAATTAGTAGACACGGCTTTTAACAACTAAGATAAATTATGTACTTGTAGATCATTTGGGCATAATCATCATATGATAACAACATAAATTTCTGTCATAACGGTGATACATCGCAAATGCTTGTAAACTGTAAACTCTTAAATGTCTTATTCACACTAACTATGCAAAATAGGTACCTCCTATGTATGGAAGACAGTAGCTATTATCTTAATACTTTTAATTCTCTGCTTCTCTTGAAACGCCAGTGAGTGGAAG…	37; Phospholipase A2 hemilipin-2 (Fragments) OS=Hemiscorpius lepturus OX=520031 PE=1 SV=1;54.545	22	0.038;tr|H2CYN7|H2CYN7_PANCV	130; Uncharacterized protein OS=Pandinus cavimanus OX=217261 PE=2 SV=1;41.270	126	7.24e-27;Orbitrapmatches	Transcriptome;Insolution_Sp9Female	TRINITY_DN1507_c0_g2_i1:True:54	100.000	135	1.0;Transcriptome_Sp9Female	TRINITY_DN1507_c0_g2_i1:True:54	100.000	135	1.0;NA;NA;6;112;13020.34218;NA;NA
Uncharacterized Venom Compound Ei28_variant;Other;Male	Absence;Signal Peptide	CS pos: 23-24. Pr: 0.9828	0.9828;Stop codon present;81_1	Digestion Sp2;61	159.04;NA;NA;NA;>TRINITY_DN1069_c0_g2_i3:False:997;;CTTCAGTTTGGGAAAAGTTAATAACGCATTGAAATTTGGTATAGTTTAAAACATTTGTGATTTACGTTTCATATGTCATCATGCACTTAGGTGAGCGAATTTCTTCACCACATTCTCTCACCAATTAAAGGTCGATATTTTCTTAAATATACGTTAATACAAGTGAAAATCCTTTATCTTTAAACTTCCAAAAACCGAAAATTTTTTGAGGCTACATGACGCGCCAGAAATGAAAAATTATACAAAGGCAACATATATGAATATCCATCATATTATTGGTACAGGTACAGTAAGTGCACGATATTATTTTTACATAAAATCTGAATTTCTCCTCCACATAAAAATTC…	79.167	24	1.0;295.477;NA;2.54781;sp|P0DSN5|HEMI2_HEMLE	37; Phospholipase A2 hemilipin-2 (Fragments) OS=Hemiscorpius lepturus OX=520031 PE=1 SV=1;54.545	22	0.066;tr|H2CYN7|H2CYN7_PANCV	130; Uncharacterized protein OS=Pandinus cavimanus OX=217261 PE=2 SV=1;41.270	126	2.50e-26;;Insolution_Sp9Female	TRINITY_DN1507_c0_g2_i1:True:54	100.000	135	0.7988165680473372;Transcriptome_Sp9Female	TRINITY_DN1507_c0_g2_i1:True:54	100.000	135	0.7988165680473372;NA;NA;7;146;16975.16019;NA;NA
Uncharacterized Venom Compound Ei29;Enzyme;Male	Absence;Signal Peptide	CS pos: 22-23. Pr: 0.9784	0.9784;No Stop codon present;82	Digestion Sp2;40	158.81;NA;NA;NA;>TRINITY_DN45_c1_g1_i3:True:26;;ATATATAATAGGTTACGTCATCATAAGATCTATGTCTTGCCTTTGTTGTTCATCCAAGAAATTTTAGTTGTTGTGTCAACGCGAAATTATATCCGCTGGTCATGTGGACCATTCGCTATTTTCTATTAGTTTCGGTTTTCGCCAACCCAGAACAACAAGTTTCCTCAGAACTGATTTCAAATGAAACTCAAGCGTGGAAATTTCTATTCGATAACGATGAAGTATTTATTTACGGCTGCAAGACTGGAAATTTCTCCAGTTTGGACTTGACTACACAGAACTTTTCTTGGCAAAACTTTACCGATCCTTTACTGAAAAGAACCTTTAATCTAACAGCAGAAAAAGAAACTG…	34.197	193	0.2969230769230769;53.3472;NA;20.7057;NA;NA;NA;tr|A0A1W7RA12|A0A1W7RA12_9SCOR	523; Angiotensin-converting enzyme OS=Hadrurus spadix OX=141984 PE=3 SV=1;42.339	248	2.37e-68;;Insolution_Sp9Female	TRINITY_DN1669_c0_g1_i1:False:1916	88.800	250	1.0;Transcriptome_Sp9Female	TRINITY_DN1669_c0_g1_i3:False:1694	88.800	250	1.0;NA;NA;2;228;27841.75243;NA;NA
Uncharacterized Venom Compound Ei30;Other;Male	Absence;Signal Peptide	CS pos: 24-25. Pr: 0.9835	0.9835;Stop codon present;83	Digestion Sp2;45	158.34;NA;NA;NA;>TRINITY_DN218_c0_g1_i2:True:6;;TGCTAACTGGAAGCTTCCTATCATACACATTGCACGATGTTGCTAACTGGAAGCTTCCTATCAGTTGCAGCGTTATTAAATATTTACCTAACAGTAGCAGTTAACGCAAAACTCCATTTTCCAGAGGTCAGAGACAAGAGTCGACCACACGTGTTCTTTTTAGGGCGATCGCCACCACTGAGTGAATTTACGTTTTGTTCCTGGATCAAACCGTACACATTAAAGAACGGACCTTCCTTAATATCGTATTTTAAAAATGTTTCGGTTAGCCTAATTGAAGTGGGTATAATCCATGGGTCTGGGAACGCAATGAACTTCAGAGTAACCATCGATGGTAATGTTATGATTCTC…	30.667	225	0.9183673469387755;171.081;NA;11.6328;tr|R7U8K0|R7U8K0_CAPTE	1967; Uncharacterized protein OS=Capitella teleta OX=283909 GN=CAPTEDRAFT_199677 PE=4 SV=1;22.973	222	1.98e-06;tr|A0A1W7RAR3|A0A1W7RAR3_9SCOR	241; Pentaxin OS=Hadrurus spadix OX=141984 PE=3 SV=1;31.982	222	1.43e-26;;Insolution_Sp9Female	TRINITY_DN15_c0_g1_i1:False:892	31.696	224	0.9180327868852459;Transcriptome_Sp9Female	TRINITY_DN48979_c0_g1_i1:True:121	33.772	228	0.9344262295081968;NA;NA;9;220;24735.05144;NA;NA
Uncharacterized Venom Compound Ei31;Enzyme;Male	Absence;Signal Peptide	CS pos: 26-27. Pr: 0.9825	0.9825;Stop codon present;87_2	Digestion Sp2;26	152.42;NA;NA;NA;>TRINITY_DN3022_c0_g1_i5:True:1;;ATCTGCTCTCGGCTTTATTATATACACGTCAGGTGTAATTCGTATAATGGAGGCGCGCACCAAAATTATTTGTTCCGCATACTTGGTCTTCGTTTTAACAACAGGATTCCGCCTGGCCTGTGGAATAGATATTAAGTATGACTACATCGTAGTTGGAGCTGGGTCTGCTGGATCTGTGGTTGCGAATAGACTTTCATCGAATCCAAATAATAGTGTTCTGTTGTTAGAAGCAGGAGAAAGACCAAACCTATTGTCTGAAATTCCGAACTTTTACTTTTACTTGAACAATACAAAATATGACTGGAATTATACTGTACAGATGCCTTCGTTTCCAGAAGATGGAATTTATT…	99.702	336	1.0;9.25641;NA;1.99325;tr|A0A2D4IFS3|A0A2D4IFS3_MICLE	559; Choline dehydrogenase (Fragment) OS=Micrurus lemniscatus lemniscatus OX=129467 PE=3 SV=1;35.949	548	5.99e-96;tr|A0A834RG74|A0A834RG74_SARSC	629; Glucose dehydrogenase -like protein OS=Sarcoptes scabiei OX=52283 GN=SSS_5468 PE=4 SV=1;40.214	562	3.28e-132;;No hits in Other Sex;Transcriptome_Sp9Female	TRINITY_DN54585_c0_g1_i1:False:1855	96.780	559	0.9824253075571178;NA;NA;6;543;60036.59134;NA;NA
Uncharacterized Venom Compound Ei32;Other;Unspecific;Signal Peptide	CS pos: 21-22. Pr: 0.9836	0.9836;Stop codon present;96	Digestion Sp2;80	144.95;10	49.52;81	120.85;NA;>TRINITY_DN30344_c0_g1_i1:True:47;>TRINITY_DN49557_c0_g1_i1:True:31;CGGCCTTTTCCTCACACTTGATTTTCAACTGCAGCTGCTACCGGTGAACAGCGAAAATGAACGGAGCAGTACTGACTTTGATAACTGCAATTGTACTTTTCTGTAATAATGCATTTTCTCAAAAGTTAAACGAGCAACACTGGAGATTTATTTGCGGTTCCTCGAGAGAGACTATTCAAAAACTGCTCGATTGTTATTTGCCTATAACATCTCAGAAATGGGTTGATGCACATAAACGGTTAGAAGAATGCACCAATATGTCTCAAGTAGACATTGTTATAGCATTTTGTTCACGAGATACATTGCCAAAACCAGAGAAAA…	131; Venom protein OS=Hadrurus spadix OX=141984 PE=4 SV=1;47.967	123	3.82e-31;Orbitrapmatches	Transcriptome;Insolution_Sp9Female	TRINITY_DN49557_c0_g1_i1:True:31	100.000	126	1.0;Transcriptome_Sp9Female	TRINITY_DN49557_c0_g1_i1:True:31	100.000	126	1.0;NA;NA;6;105;12136.79714;NA;NA
Uncharacterized Venom Compound Ei33;Other;Female	MALDI;Signal Peptide	CS pos: 16-17. Pr: 0.9821	0.9821;Stop codon present;97	Digestion Sp2;55	144.39;NA;81	154.15;34	102.82;>TRINITY_DN28194_c0_g1_i1:False:571;>TRINITY_DN1020_c0_g1_i1:True:0;TTTTTTTTTTTTTTTAATGGCACCAAATCGTATTTTATTAAAAATTATTTCATGCTTGGCACTATTAGTTAATTTCCATCATATTACTGCTTTTGCTTCTTGAAACCTTAAATAGAAATACATAAGATAGTGTTTTTGCTTGAACTTAGGTCGAATCATAAGTTTTATAATTACATAGAAAGCATATACTTTAGGTGAAGATGTGTAGCCATCTATTGCTGGCCCAATGAAGATTGCCTGCAAGCTTCAACCACTTTTGACAGTTCATCTTCTGTTAGAGCGGTTGAAGGATCGATGTCCCTGCTCAAGCATTTTCCGTACTTA…	116; Venom peptide HtTxB OS=Hadogenes troglodytes OX=1577150 PE=2 SV=1;57.018	114	2.38e-42;Orbitrapmatches	Transcriptome;Insolution_Sp9Female	TRINITY_DN1020_c0_g1_i1:True:0	99.138	116	1.0;Transcriptome_Sp9Female	TRINITY_DN1020_c0_g1_i1:True:0	99.138	116	1.0;NA;NA;6;100;11127.2901;NA;Mass: 4084.79272 (QVHEDPLCNASNDVLNKYLTCMANNYKPAFESAITCS)	PTMs: pQ	C-C
Uncharacterized Venom Compound Ei34;Other;Unspecific;Signal Peptide	CS pos: 23-24. Pr: 0.9805	0.9805;Stop codon present;98	Digestion Sp2;40	144.18;NA;47	121.71;NA;>TRINITY_DN389_c0_g1_i3:True:60;>TRINITY_DN141_c0_g1_i7:True:59;GCGGAAGGAGAATAAAGTACGCAAATCCATGAAAACGACTGAAAACGAGTACTATTTTGAAGAAAAATGTTTAACTACGGCACGGCGTTGTGGTTTATATGTTCAGCCATCCTGCTTGCATCGACGATTTGCTGTCGTCAAACGCAAATAACGTCTCTTAATATCACCGAAATCAACGCAACCAGTAAAGCTCAAGAGCCTCCCTGCACGAAGCTTGAACCCAACGATTACTTGGACGGATTGATTAACAGCCTGAAAAATAAGACTATCGATACAATCCCTTTGCCAGACGACCCCGGAATAACCAATCTTAAGGAAGGTCAAG…	25.414	181	0.8080357142857143;104.589;276.6;58.5638;NA;NA;NA;tr|C5J8A4|C5J8A4_OPICY	177; Uncharacterized protein (Fragment) OS=Opisthacanthus cayaporum OX=573324 PE=2 SV=1;50.000	162	8.58e-46;Orbitrapmatches	Transcriptome;Insolution_Sp9Female	TRINITY_DN141_c0_g1_i1:True:59	100.000	227	1.0;Transcriptome_Sp9Female	TRINITY_DN141_c0_g1_i3:True:184	100.000	227	1.0;NA;Pfam	Group 7 allergen	5.5E-19| Gene3D	-	G3DSA:3.15.10.50	9.2E-20;2;204;22586.85898;NA;NA
Uncharacterized Venom Compound Ei35;Other;Male	Absence;Signal Peptide	CS pos: 17-18. Pr: 0.9829	0.9829;No Stop codon present;99_2	Digestion Sp2;38	143.99;NA;NA;NA;>TRINITY_DN153_c0_g1_i1:True:251;;CTTTTTTTTTTTTCTGAACATATTTATTTTATTTCACTTTCATCAAGTACAGGGGTCATATCCCAAGACGCAACGCTCCCTTTAACAAGCCACATTCCAAGGGCGAATAGTGAAAAAGACATGCATTGTGGTGAATCCACCCGCTTTGTCGAATTCTTTTCCAAAACAGTCAGGAACAGGATCCAGAAATCTCGAAAAAGACTTTTTTGGAGGATGTTCCAGCCTAGTGCTGAAATCGAAATTTCCAACAGAAGCAAATCCAAAACCAGTTAACTTTCCACGATTAAACATAAGGAAAAAAGGATAGAATTGGTCACAGTTCATGTCTTTCTCGACGTTGTACCAGTAA…	91.022	323	1.098639455782313;14.3069;NA;401.334;NA;NA;NA;tr|A0A1W7R968|A0A1W7R968_9SCOR	281; Venom protein OS=Hadrurus spadix OX=141984 PE=4 SV=1;67.681	263	1.64e-136;;No hits in Other Sex;Transcriptome_Sp9Female	TRINITY_DN2325_c0_g1_i1:False:966	90.584	308	1.0;NA;NA;6;291;33208.10291;NA;NA
Uncharacterized Venom Compound Ei36;Enzyme;Unspecific;Signal Peptide	CS pos: 19-20. Pr: 0.9843	0.9843;Stop codon present;102_1	Digestion Sp2;35	138.91;34	161.47;56	161.84;60	220.57;>TRINITY_DN2083_c0_g3_i1:False:1168;>TRINITY_DN42547_c0_g1_i1:False:1170;TTTTTTTTTTTAATAAGCTGAGTTTTTAATCGAGGAAAATATACTTTACAAGCAACTGAAAATGCAAATTTCAGATTTCTGAAGATTATTTATTGCTGCGAGTTATGGTTCCTTCATAGAAGTATTCTTGGCTTACACGTCGCTCTCTCGGTAACTTCGTAAATCCAATCGGTGTATTTTGCAACGTTAGTGTAAACTCCGGACACACCTTTCAACGCGCAGTTCTTGCCAAAGGAAACTATTCCCGCTAAGCAATAAACGTTTCCATCTCGAGAAAGAAGAGATCCACCAGAATCACCCAGGCACGCGTCTTGTTCTT…	99.687	319	1.0;29.6942;178.217;61.1228;tr|A0A223PK27|A0A223PK27_DABRR	629; Plasma kallikrein OS=Daboia russelii OX=8707 PE=2 SV=1;36.293	259	3.48e-40;tr|A0A1W7R9I8|A0A1W7R9I8_9SCOR	304; Serine proteinase OS=Hadrurus spadix OX=141984 PE=4 SV=1;65.636	291	1.21e-140;Orbitrapmatches	Transcriptome;Insolution_Sp9Female	TRINITY_DN42547_c0_g1_i1:False:1170	99.662	296	1.0;Transcriptome_Sp9Female	TRINITY_DN42547_c0_g1_i1:False:1170	99.662	296	1.0;NA;NA;10;277;30437.25866;NA;NA
Uncharacterized Venom Compound Ei37;Other;Unspecific;Signal Peptide	CS pos: 17-18. Pr: 0.9829	0.9829;Stop codon present;104	Digestion Sp2;62	138.55;NA;56	104.28;NA;>TRINITY_DN31554_c0_g1_i1:False:677;>TRINITY_DN42832_c0_g1_i1:False:679;TTTTTTTTTGTATGTCAATATATTTTATTTTCATCTTTTATATTACACTCATTTTGAGTAAACTGTAAAAATAGATTCTGTAAAACCAACTATGAAAAATTATATTAATACTATTCTTCTTCGACAGATTTAAATTCAAGCCTCAATTTTGGATGGAATTTTCACACATACAATATCATTGCTGTTGTCATCTTTCAGTTGATATTGAACTGTGACAGCAATTTGGGGATAGGAAGATAAAATTTCAAAAGAATTTTTGTACGTATAGCTTTTTCCTTCAGAAAGTGGACAATCAAGTCCAGAATTTATACAACCAT…	100.000	180	1.0;225.124;178.716;91.1675;NA;NA;NA;tr|A0A2I9LPE6|A0A2I9LPE6_9SCOR	148; Protein NPC2-like protein OS=Centruroides hentzi OX=88313 PE=3 SV=1;55.000	140	3.70e-48;Orbitrapmatches	Transcriptome;Insolution_Sp9Female	TRINITY_DN42832_c0_g1_i1:False:679	100.000	146	1.0;Transcriptome_Sp9Female	TRINITY_DN42832_c0_g1_i1:False:679	100.000	146	1.0;NA;NA;6;129;13980.95784;NA;NA
Uncharacterized Venom Compound Ei38;Other;Male	Absence;Signal Peptide	CS pos: 21-22. Pr: 0.9798	0.9798;Stop codon present;107_5	Digestion Sp2;56	132.99;49	152.04;NA;NA;>TRINITY_DN596_c0_g1_i2:True:241;;CCGGTATTAACATAAAAGGACAAATAATTGTTTGGAAATAGAGATTAATCGTTTATTGCTAGCTCCAAATTAAAGCTGTTCGTAATAAAAAATAAGGTCTTTATTGATATTAACACGCTTCTTTGCGCTGCACCGTATAATAGCCTGAAACAGGTGTTGTCTTACTAAGAAATGATGTGCATTTACTGAATAAAAGCAAATACGAATTGCGAGCTCTCATTACGAATAAATCTGCTTTTAATACTACATAGAAAAGTGTTGTGCTTTTGTGAGAAACATGGCTGGAAATTTCTATTTGATTAGTTTTGTGCTACTCGGAGTCTTCACGGGGATGTTGGCTCTCAGTTGTTCA…	84.158	101	0.9439252336448598;2184.32;NA;65.6742;sp|P0CJ14|VP302_LYCMC	94; Venom protein 302 OS=Lychas mucronatus OX=172552 PE=2 SV=1;44.565	92	1.24e-16;tr|A0A224XG57|A0A224XG57_9SCOR	120; Putative venom gland protein OS=Megacormus gertschi OX=1843536 PE=4 SV=1;56.311	103	1.11e-34;;Insolution_Sp9Female	TRINITY_DN1435_c0_g1_i1:False:1474	36.000	100	1.0638297872340425;Transcriptome_Sp9Female	TRINITY_DN583_c0_g1_i1:False:584	97.872	94	1.0;GO:0005520: insulin-like growth factor binding (molecular_function)| GO:0005576: extracellular region (cellular_component)| GO:0001558: regulation of cell growth (biological_process);Pfam	Insulin-like growth factor binding protein	1.3E-10| PANTHER	INSULIN-LIKE GROWTH FACTOR BINDING PROTEIN-RELATED	PTHR14186	2.1E-20| PANTHER	SI:CH73-330K17.3	PTHR14186:SF20	2.1E-20| SMART	IB_2	SM00121	4.6E-8| SUPERFAMILY	Growth factor receptor domain	SSF57184	1.57E-15| ProSiteProfiles	Insulin-like growth factor-binding protein (IGFBP) N-terminal domain profile.	PS51323	18.362| Gene3D	-	G3DSA:3.30.60.30	6.4E-10;12;73;7728.29149;NA;NA
Uncharacterized Venom Compound Ei39;Other;Male	Expressionlevel;Signal Peptide	CS pos: 22-23. Pr: 0.9628	0.9628;Stop codon present;110	Digestion Sp2;32	132.33;NA;NA;NA;>TRINITY_DN967_c0_g1_i1:True:40;>TRINITY_DN10560_c0_g1_i1:False:1424;CGTCACACAATGACGCTGCAACAGAAAGACATATAAGTAGCAGTTACTGAGCGATAACAAAACAATCATTGACCCATTTATCAAGTTAACGAGCAACATGATCACCAAGGCGCTTCCTCTCTTGCTTGTGGCCAGCTACTCGCTAATTCAAGGAATTACCAGCATTTGTCCGAACGAAGAATTTATTCAGCCGTGCAGTTGTACACCGTTAGCATTTGGCAATCATGTAGTATGTAATAGGATCAACTCTACGGAACTTATCCAAGATATATTTCAAGTTTTGTCCCCCTACGATATCAATACCCTTCTGTTCA…	100.000	327	1.0;674.718;18.8453;101.169;tr|A0A7M7JHE6|A0A7M7JHE6_VARDE	2450; Non-specific serine/threonine protein kinase OS=Varroa destructor OX=109461 PE=4 SV=1;31.461	89	4.79e-06;tr|A0A087T7H6|A0A087T7H6_STEMI	302; Leucine-rich repeat-containing G-protein coupled receptor 4 (Fragment) OS=Stegodyphus mimosarum OX=407821 GN=X975_13973 PE=4 SV=1;34.409	279	9.45e-54;Transcriptome;No hits in Other Sex;Transcriptome_Sp9Female	TRINITY_DN10560_c0_g1_i1:False:1424	100.000	318	1.0;GO:0005515: protein binding (molecular_function);Pfam	Leucine Rich Repeat	1.0| PANTHER	PROTEIN SLIT	PTHR45836:SF4	1.4E-32| Pfam	Leucine rich repeat	PF13855	1.8E-7| Pfam	Leucine rich repeat	PF13855	1.6E-9| ProSiteProfiles	Leucine-rich repeat profile.	PS51450	8.189| ProSiteProfiles	Leucine-rich repeat profile.	PS51450	5.895| ProSiteProfiles	Leucine-rich repeat profile.	PS51450	7.281| SUPERFAMILY	L domain-like	SSF52058	4.42E-29| PANTHER	SLIT HOMOLOG	PTHR45836	1.4E-32| SMART	LRR_typ_2	SM00369	280.0| SMART	LRR_typ_2	SM00369
Uncharacterized Venom Compound Ei40;Other;Female	Expressionlevel;Signal Peptide	CS pos: 20-21. Pr: 0.9840	0.9840;Stop codon present;115	Digestion Sp2;61	126.12;NA;71	114.59;NA;>TRINITY_DN4479_c0_g2_i3:False:752;>TRINITY_DN502_c0_g1_i2:False:724;TATTAATTAACTCTTCGATAAAAACGAAACTTCAATTTATAATTTCATTAATAACTTTTAATTGAATAAAATTAAATAGACATATTAAGACCTTATTAAACAGACCGTTATTGTACTACATAAATTTGCTGAGCATTCGTTTGCGATGGAGAAATTTTCAATACAAAGACTTTCAAATTTTCAATACAACATTTATCAACTCCATCGAAACGTACATAATGCGTTCGTTTTAATTTATCATAAATACGACGAATTTACACAGATGTTGATTCACAACTTGCAACCTGCAACGTGCTCCTCAACATTCGTCCCTCTGCAAC…	50.714	140	0.8092485549132948;106.764;216.872;9.15225;NA;NA;NA;tr|A0A0U1S886|A0A0U1S886_ISOMC	144; GLYCOSYL_HYDROL_F22_1 domain-containing protein OS=Isometrus maculatus OX=497827 PE=2 SV=1;72.340	141	5.42e-74;Orbitrapmatches	Transcriptome;Insolution_Sp9Female	TRINITY_DN502_c0_g1_i3:False:724	100.000	144	1.0;Transcriptome_Sp9Female	TRINITY_DN502_c0_g1_i3:False:724	100.000	144	1.0;NA;NA;8;124;13762.65273;NA;NA
Uncharacterized Venom Compound Ei41;Other;Unspecific;Signal Peptide	CS pos: 18-19. Pr: 0.9830	0.9830;Stop codon present;126	Digestion Sp2;45	118.75;NA;48	95.02;NA;>TRINITY_DN1271_c0_g6_i2:False:557;>TRINITY_DN1084_c0_g2_i2:True:2;TTTTTTTTTTTTTTTCTAGATGCTAATATTTATTACTGCAGTTATATTATTTCTTATACAGATTTCTTTGGATAAAGCCTTCATTCAGTAGAGTGTATTAAATCGATTTTCCGGTCATTCAATAGCCTGAAATTTGTGTCATGTTCAGCATTGATTTTCTCTGAAACATTTCTCCACTTCATTCAGGATGACGTCTTTCGTAAACTTTGAAAATAAATCTTCAAAGAAACAATTAGAAATGCCGATTTTTTCCTCTATATTATTCTCCTCGCAGTAGAATTTGTTGTACTCTTTTACACTAGTAAAGCCTTTATCGTCGGAAG…	97.541	122	1.0;41.9934;287.451;57.9456;tr|A0A023GJY6|A0A023GJY6_AMBTT	420; Putative p53-interacting protein 53bp/aspp (Fragment) OS=Amblyomma triste OX=251400 PE=2 SV=1;32.353	68	0.036;tr|A0A1W7R973|A0A1W7R973_9SCOR	117; Venom protein OS=Hadrurus spadix OX=141984 PE=4 SV=1;32.203	118	3.08e-16;Orbitrapmatches	Transcriptome;Insolution_Sp9Female	TRINITY_DN1084_c0_g2_i2:True:2	99.145	117	1.0;Transcriptome_Sp9Female	TRINITY_DN1084_c0_g2_i2:True:2	99.145	117	1.0;NA;NA;8;99;11561.25813;NA;NA
Uncharacterized Venom Compound Ei42;Other;Male	Absence;Signal Peptide	CS pos: 17-18. Pr: 0.9787	0.9787;Stop codon present;128	Digestion Sp2;56	117.72;NA;NA;NA;>TRINITY_DN42301_c0_g1_i1:True:84;;TTCTTTAGAAGCAACTTAGATTAGGATTTGGGTGAAATCCTTCAACAGCTCGGTGCGTATTTAACAAGATACTATTCTGTTTAGATGTCGTACTTCCTGCTGTTCACCATCGGCTGCGTCGGCTGGATCCATTGCCAGAGTGTGCGCGACTGGACATTCCGAAACTTTCGGACCATAAGGGCGCTAGCCGATTGCTCCGACCAGGCCGTCTGGAACCTGTGCGAAAAATGTGCAAAATTCACGCGAAGCGACACCGCTTTCCCGAATTGCTGTCAAAACCGTAGAGATGCTCGCACTTGGTGCAATTCCTTCTTGACATTCCGACTATCACACCTGGAACAGCCGATT…	60.000	35	0.3181818181818182;143.95;NA;41.9642;NA;NA;NA;tr|A0A6M2DUK1|A0A6M2DUK1_9NEOP	94; Putative secreted protein OS=Xenopsylla cheopis OX=163159 PE=4 SV=1;35.897	78	3.98e-09;;No hits in Other Sex;Transcriptome_Sp9Female	TRINITY_DN9601_c0_g1_i1:False:587	60.000	35	0.3723404255319149;NA;NA;7;77;9130.38687;NA;NA
Uncharacterized Venom Compound Ei43;Other;Male	Absence;Signal Peptide	CS pos: 21-22. Pr: 0.9792	0.9792;Stop codon present;129	Digestion Sp2;50	117.64;13	59.90;NA;NA;>TRINITY_DN372_c0_g1_i1:False:521;;TTTTTTTTTTTTTTATATAAAACTTCTTTATTGAGAGTCGAGAGTGTACAAGAGAAAAAAGTTGAACGATACTATTTCAATCGCACTCAGTGAGTATACAACTTTTCCTTATTAGTTTTCTTAAGCGAGAAAGTATATCGAGAAAGACTTTCGCAGAAAAACTCAGAACAGGTGTTAGTTGCAATCTATTTCTCCAAAACAGCAGTGAGGATAAATACCTTTTCTTCTATTTAATGGACATTCCTTGCCGTCTTTAGAAATTCCAGCTACATAGGGGCACCCAAATATAGTGATTTGACCCACTGATTTTTGGTCATTGCTACTATCAACAGTACAAATAATTCCTTCACAT…	57.895	76	0.6178861788617886;278.628;NA;8.29218;tr|T1J633|T1J633_STRMM	122; SVWC domain-containing protein OS=Strigamia maritima OX=126957 PE=3 SV=1;29.358	109	4.07e-07;tr|A0A1W7R9A9|A0A1W7R9A9_9SCOR	107; Venom protein OS=Hadrurus spadix OX=141984 PE=4 SV=1;34.579	107	3.07e-13;;No hits in Other Sex;Transcriptome_Sp9Female	TRINITY_DN48704_c0_g1_i1:False:523	37.615	109	0.9819819819819819;NA;Pfam	Single domain von Willebrand factor type C	6.7E-7| SMART	SVWC_2	SM01318	1.9E-4;8;90;9873.70932;Mass: 1341.7274400000001 (YQKIYITSVVE)	PTMs: A	Mass: 1341.7274400000001 (YQKIYITSVVE)	PTMs: A;NA
Uncharacterized Venom Compound Ei44;Enzyme;Female	Expressionlevel;Signal Peptide	CS pos: 25-26. Pr: 0.9801	0.9801;Stop codon present;133_1	Digestion Sp2;14	112.56;NA;58	193.72;NA;>TRINITY_DN2400_c0_g1_i2:False:1822;>TRINITY_DN207_c0_g1_i3:False:2066;CTCCAATCTCATTTATTCATTACCTAGAATCCCCAAAGTACCTAAAATAATGTTACATAGAATTAACGAAAATTGAATAAACAGTAATCACACAACAATTAGGATTTTGATAAGGGCGCGATCTTTCAGTAGTACTGCTTCCAAAACTTGCATTCCTCCATATATGGATTTATGATCTTTGCGTTGTAAGGATTCAGATCGGCAGCTGCCGGTTTTTCTTTAGAATACATTGGCCATTCAGCTTCCAGCCCTTGAAACACTGGCTTCCCAGTCTTTGCAAATGAAATCCAGATATCCATTATCCTATTGCTAAATTCC…	97.312	558	0.9964285714285714;9.48456;842.954;19.6035;sp|W4VSJ0|ACES_TRILK	560; Acetylcholinesterase-1 OS=Trittame loki OX=1295018 PE=1 SV=1;36.136	559	7.64e-103;tr|A0A4Y2EC56|A0A4Y2EC56_ARAVE	544; Carboxylic ester hydrolase OS=Araneus ventricosus OX=182803 GN=ACES_47 PE=3 SV=1;40.653	551	2.53e-136;Orbitrapmatches	Transcriptome;Insolution_Sp9Female	TRINITY_DN207_c0_g1_i3:False:2066	98.540	548	1.0;Transcriptome_Sp9Female	TRINITY_DN207_c0_g1_i3:False:2066	98.540	548	1.0;NA;NA;7;523;58420.17413;NA;NA
Uncharacterized Venom Compound Ei45;Enzyme;Male	Absence;Signal Peptide	CS pos: 18-19. Pr: 0.9820	0.9820;Stop codon present;135	Digestion Sp2;21	110.92;NA;NA;NA;>TRINITY_DN4229_c0_g1_i2:True:235;;AGGGGAATATATAAATAATTAATCCCCATAACCCGAATCAACAAACAAACAAACAATAAACATAACACCTATGTAACGGCTGAGTTGTAAATTAGCGTAGAAATACATAAATTTGATATCAAATATAGGTGTGCTATATTTAAATTCAGAAATGAACAAAAGTCCATCCTATTCGTTAAAAGCGTATTCTAATACAAAGTTCAAAATTTGCGTAATCATGATTGCAGAGTGATAAATCTGTTTCATAACCATTCGTCAAATTTCTGTGATATGTCAGGACGTGGATCAGAACCATTCGTCAAATTGTAACATGCTTTCTGTCTGCCTCGGAATCCTATCTTTAAAAAT…	99.007	403	0.744916820702403;1.01659;NA;32.4362;tr|A0A6J0T5T8|A0A6J0T5T8_9SAUR	513; Chondroitinsulfatase OS=Pogona vitticeps OX=103695 GN=GALNS PE=3 SV=1;71.148	357	0.0;tr|A0A6P5AXX4|A0A6P5AXX4_BRABE	520; N-acetylgalactosamine-6-sulfatase-like OS=Branchiostoma belcheri OX=7741 GN=LOC109487383 PE=3 SV=1;67.742	372	0.0;;Insolution_Sp9Female	TRINITY_DN34112_c0_g1_i1:False:1698	100.000	374	0.9765013054830287;Transcriptome_Sp9Female	TRINITY_DN34112_c0_g1_i1:False:1698	100.000	374	0.9765013054830287;NA;NA;3;365;40927.58;NA;NA
Uncharacterized Venom Compound Ei45_variant;Enzyme;Unspecific;Signal Peptide	CS pos: 18-19. Pr: 0.9820	0.9820;Stop codon present;135_1	Digestion Sp2;16	110.92;NA;16	97.44;NA;>TRINITY_DN4229_c0_g1_i1:True:235;>TRINITY_DN34112_c0_g1_i1:False:1698;AGGGGAATATATAAATAATTAATCCCCATAACCCGAATCAACAAACAAACAAACAATAAACATAACACCTATGTAACGGCTGAGTTGTAAATTAGCGTAGAAATACATAAATTTGATATCAAATATAGGTGTGCTATATTTAAATTCAGAAATGAACAAAAGTCCATCCTATTCGTTAAAAGCGTATTCTAATACAAAGTTCAAAATTTGCGTAATCATGATTGCAGAGTGATAAATCTGTTTCATAACCATTCGTCAAATTTCTGTGATATGTCAGGACGTGGATCAGAACCATTCGTCAAATTGTAACATGCTTTCT…	100.000	541	1.0;14.1122;21.6246;32.4362;tr|A0A402ER07|A0A402ER07_9SAUR	562; Chondroitinsulfatase OS=Paroedura picta OX=143630 GN=parPi_0006417 PE=3 SV=1;65.769	520	0.0;tr|A0A3M6UCD5|A0A3M6UCD5_POCDA	522; Chondroitinsulfatase OS=Pocillopora damicornis OX=46731 GN=pdam_00011380 PE=3 SV=1;68.293	492	0.0;Orbitrapmatches	Transcriptome;Insolution_Sp9Female	TRINITY_DN34112_c0_g1_i1:False:1698	100.000	516	1.0;Transcriptome_Sp9Female	TRINITY_DN34112_c0_g1_i1:False:1698	100.000	516	1.0;NA;NA;9;498;56558.89937;NA;NA
Uncharacterized Venom Compound Ei46;Other;Unspecific;Signal Peptide	CS pos: 19-20. Pr: 0.9790	0.9790;Stop codon present;149	Digestion Sp2;56	103.67;NA;56	93.01;31	65.58;>TRINITY_DN38008_c0_g1_i1:True:168;>TRINITY_DN5228_c0_g1_i1:False:458;TTTGTTAAAACAGCTTATTCTATCTGGAAGTTCGTAATAAACGTATAGTTACGATGGAAATACAAGCAATAATGCCATACCGAGGTAGATTTTCATTGGCCTTTCAGTTATAGCCTCAAACATAGAACAGGATATAAGAAAGAGCTGAAGGAGCACATTTAGATGTAGCTAGTCACCATGAAACCTTTAGTGCTCGTGTTTTTGGTTGTCATTGCGATTCCACGTTCTATAGCAAAACGGCCTAGTTGTGACGAAAACGAGATGTTCTTAGAATGCGCTTTCAATTGTCGAGCTGAAGTTTGTCCTGGAATGAGAAATGTGGT…	37.647	85	1.0119047619047619;917.884;484.669;0.550093;sp|Q86RQ7|VPI_MESMA	90; Venom peptide BmKAPI OS=Mesobuthus martensii OX=34649 PE=3 SV=1;29.730	74	0.002;tr|A0A151JXP5|A0A151JXP5_9HYME	77; Chymotrypsin inhibitor OS=Trachymyrmex septentrionalis OX=34720 GN=ALC56_05825 PE=4 SV=1;36.842	76	4.53e-06;Orbitrapmatches	Transcriptome;Insolution_Sp9Female	TRINITY_DN5228_c0_g1_i1:False:458	100.000	82	1.0;Transcriptome_Sp9Female	TRINITY_DN5228_c0_g1_i1:False:458	100.000	82	1.0;NA;Pfam	Trypsin Inhibitor like cysteine rich domain	9.5E-7| Gene3D	Laminin	G3DSA:2.10.25.10	2.2E-7| SUPERFAMILY	Serine protease inhibitors	SSF57567	5.49E-6;10;63;7214.26119;NA;NA
Uncharacterized Venom Compound Ei47;Enzyme;Unspecific;Signal Peptide	CS pos: 16-17. Pr: 0.9866	0.9866;Stop codon present;150_1	Digestion Sp2;15	102.7;NA;NA;NA;>TRINITY_DN1525_c0_g1_i3:False:2287;>TRINITY_DN10657_c1_g2_i4:False:2393;TTTTTTTTTAGAAAATGTATCAAATAGAAATTTATTATCATAATTCATTTTATGTATAATATACAGTGTATAAACCATTCTGAAATATACTATGCACATTATCATACAAACATTATTGCCATTTAGTACAAGATAACTCAAGTACTGCTGCACTCAGAATCAGATATACATTTTCAAAGATACTATACATAATCAAAACTGAAAATATATCACATTTAGTACAGATACAATTTTTGAAATAAAAAATAGTTGAGCTAATTGATTATCCATATCAGCGATTTTCAACCAGTGTGCCACAAGATTTTTTTAAA…	99.800	500	1.0;25.4847;9.60665;3.14008;sp|B1P1J3|CYT_CHIGU	135; Cystatin-1 OS=Chilobrachys guangxiensis OX=278060 PE=2 SV=1;34.921	126	1.12e-21;tr|A0A1W7RAP8|A0A1W7RAP8_9SCOR	455; Cysteine peptidase OS=Hadrurus spadix OX=141984 PE=3 SV=1;71.145	454	0.0;Transcriptome;Insolution_Sp9Female	TRINITY_DN42599_c0_g1_i1:False:1196	38.199	322	0.7108167770419426;Transcriptome_Sp9Female	TRINITY_DN10657_c1_g2_i4:False:2393	99.779	453	1.0;NA;NA;12;437;49553.85547;NA;NA
Uncharacterized Venom Compound Ei48;Other;Male	Absence;Signal Peptide	CS pos: 21-22. Pr: 0.9696	0.9696;Stop codon present;153	Digestion Sp2;13	101.34;2	65.00;NA;NA;>TRINITY_DN37_c0_g2_i1:False:1522;;TTTTTTTTTTCCGAAACCACTTTTATTTCATACAGCTTAATTCATCTAAAATCCCAAAATATTCACATTAAATTACACTTGTAAGATTGCATAATGAGGGTCAAAGGGTGACATTTTCAAAGAATTCATCGTGTCCGTTTGCCAACAATATAAAGCTTTCCACAATTCTCAGTGGGAAGATTGGTATTTGTTAACAAATGTGATATTTCCCAGTCAAAGAAGTATATTTTAACAATACCTGTGGGAACATCCAGATATATAGAATTAATAAAAGCATGATTAGCCTTAGAAACGTACTTGCAGTCCTAGGAATGTCAGTGGCGTTTCTTTTGTTGTCTGTTATTGTATTTAA…	25.911	247	0.5525727069351231;63.6469;NA;5.62244;sp|W4VS53|CRVP_TRILK	407; CRISP/Allergen/PR-1 OS=Trittame loki OX=1295018 PE=1 SV=1;29.555	247	6.23e-25;tr|A0A224XFB5|A0A224XFB5_9SCOR	256; Putative Venom allergen OS=Megacormus gertschi OX=1843536 PE=4 SV=1;73.622	254	4.35e-140;;Insolution_Sp9Female	TRINITY_DN122_c0_g1_i6:False:1505	93.850	374	1.002680965147453;Transcriptome_Sp9Female	TRINITY_DN122_c0_g1_i6:False:1505	93.850	374	1.002680965147453;NA;NA;12;352;40677.54976;NA;NA
Uncharacterized Venom Compound Ei49;Other;Unspecific;Signal Peptide	CS pos: 22-23. Pr: 0.9799	0.9799;Stop codon present;157	Digestion Sp2;15	98.4;NA;NA;NA;>TRINITY_DN2716_c0_g1_i1:True:140;>TRINITY_DN790_c0_g4_i1:False:1398;TCCACTTTGTACAGGAGTGCCTTTCACGTGACGCATGAACTAATCAACAACACAGCTGCTGAAGCAGTCACGGAGCAAGGCGGGCCGTCGGCCCTGCCCCAAACCAAGAAACAACGCATGCGCACTCAGCCAACCCGTAGCATAGGACCGACAGAGAACAGGCTGGACATATGACCCTGCAGTCGAGAGTCCAAACCCAGACTAAACAAACAAACATCACCCTATTAAAGCCGGTGGTAAGGATGGGGAAAAAACGATTTAGTTTAGTGTTTTTTCTAATAATCAGTATTATTTCAAGCTGTTTTGCTACAGAAAA…	100.000	393	1.0;52.7582;58.2274;56.5621;NA;NA;NA;tr|A0A1W7R9U0|A0A1W7R9U0_9SCOR	358; Renin receptor OS=Hadrurus spadix OX=141984 PE=4 SV=1;75.209	359	0.0;Transcriptome;No hits in Other Sex;Transcriptome_Sp9Female	TRINITY_DN790_c0_g4_i1:False:1398	100.000	359	1.0;NA;NA;1;337;37383.34132;NA;NA
Uncharacterized Venom Compound Ei50;Other;Unspecific;Signal Peptide	CS pos: 18-19. Pr: 0.9831	0.9831;Stop codon present;166	Digestion Sp2;30	92.39;NA;39	86.53;NA;>TRINITY_DN1271_c0_g6_i1:False:512;>TRINITY_DN1084_c0_g2_i1:True:24;TTTTTTTTTTTTTTTCTAGATGCTAATATTTATTACTGCAGTTATATTATTTCTTATACAGATTCCTTTGGATAAAGCCTTTATTCAGTAGAGTGTATCAAATCGATTTTCCGGTCATTCAATAGCCTGAAATTTGTGTCATGTTCAGCATTGATTTTCTCTGAAACATTTCTCCACTTCATTCAGGATGACGTCTTTCGTAAACTTTGAAAATAAATCTTCAAAGAAACAATTGCAAATGCCAATTTTTTCCTCAAGATTATTCTCCTCGCAAAAAAATTGGTTGAACTCTTTTACACTAGTAAAGCCTTTTTCGTCGGAA…	94.262	122	1.0;29.3431;15.5841;9.65868;NA;NA;NA;tr|A0A1W7R973|A0A1W7R973_9SCOR	117; Venom protein OS=Hadrurus spadix OX=141984 PE=4 SV=1;32.203	118	2.23e-16;Orbitrapmatches	Transcriptome;Insolution_Sp9Female	TRINITY_DN1084_c0_g2_i1:True:24	98.291	117	1.0;Transcriptome_Sp9Female	TRINITY_DN1084_c0_g2_i1:True:24	98.291	117	1.0;NA;NA;9;99;11602.23054;NA;NA
Uncharacterized Venom Compound Ei51;Other;Male	Absence;Signal Peptide	CS pos: 21-22. Pr: 0.9776	0.9776;Stop codon present;168	Digestion Sp2;42	91.77;NA;NA;NA;>TRINITY_DN596_c0_g1_i5:True:2500;;GCCATCTTAAACCATCTAACGTGAATTTACATTAAAAACGTTTTTATATAATGATTTAAATATTTTTATTCCCATTTTCAAATAGCATTCACGCGAAGCTACTATAATGACCTGTACATTAAAATACTTCATAGAGACTTACCTACTTGCAATATCTGAAATCCATATCAGCCCATCAACGGTTATTTTAGGCCTAATGTTAATTTTCCAAAGTCCTTCAAGGTATCAAGTAAATAGTTCTTCCCATATCTTAATTTAGCGAAACTTTATGATCTGTAGCCCTTGATTGTTAAAATAGAGAATTCATAAATGTTTTTCTTGCATAACAATTGTACAAAAGATTTGATAT…	95.098	102	0.9532710280373832;14.5445;NA;65.6742;sp|P0CJ14|VP302_LYCMC	94; Venom protein 302 OS=Lychas mucronatus OX=172552 PE=2 SV=1;44.828	87	5.78e-16;tr|A0A224XG57|A0A224XG57_9SCOR	120; Putative venom gland protein OS=Megacormus gertschi OX=1843536 PE=4 SV=1;57.426	101	4.10e-34;;Insolution_Sp9Female	TRINITY_DN1435_c0_g1_i1:False:1474	37.500	80	0.851063829787234;Transcriptome_Sp9Female	TRINITY_DN583_c0_g3_i1:False:437	82.796	93	0.9893617021276596;GO:0005520: insulin-like growth factor binding (molecular_function)| GO:0005576: extracellular region (cellular_component)| GO:0001558: regulation of cell growth (biological_process);Gene3D	-	1.7E-8| ProSiteProfiles	Insulin-like growth factor-binding protein (IGFBP) N-terminal domain profile.	PS51323	16.711| SUPERFAMILY	Growth factor receptor domain	SSF57184	6.28E-15| SMART	IB_2	SM00121	4.5E-4| Pfam	Insulin-like growth factor binding protein	PF00219	1.0E-9| PANTHER	SI:CH73-330K17.3	PTHR14186:SF20	4.7E-19| PANTHER	INSULIN-LIKE GROWTH FACTOR BINDING PROTEIN-RELATED	PTHR14186	4.7E-19;12;73;7572.29551;NA;NA
Uncharacterized Venom Compound Ei52;Enzyme;Unspecific;Signal Peptide	CS pos: 20-21. Pr: 0.7704	0.7704;Stop codon present;169	Digestion Sp2;10	91.39;NA;NA;NA;>TRINITY_DN3378_c0_g1_i1:True:120;>TRINITY_DN6751_c0_g1_i1:True:62;CCTACTGCATTCCCGTTTCTAAGAGTTCCGTCATTACCTACATCTACAATACGGGCACTGGAGAAGTCTACTAATTCCACGTAAAAACAAGTGGCACAAGGAGCAGTTGTTATTACGTAAACGATCCATCATTTAGCTACACTCCAGATGCATGTAATGTTGGTGTTCGCAGTCATTGGAATATTTGTTGGTGGTTATTTTTGTGGAGTTAATTCATCAGCACAAAACTATGAATCTCTGGATGAAGCATCACCATTTACAGAAAAATTTACTGATGGTCAGACAGCAAGGCAGCAAAGATCTTGCTATCCAAGAAA…	99.476	763	0.956140350877193;43.4815;11.7818;35.1282;tr|A0A346CLX5|A0A346CLX5_BORPO	889; Phosphodiesterase (Fragment) OS=Borikenophis portoricensis OX=1260276 PE=2 SV=1;38.420	747	3.36e-162;tr|A0A1V1WBH7|A0A1V1WBH7_9SCOR	588; Putative Venom Phosphodiesterase (Fragment) OS=Superstitionia donensis OX=311983 PE=4 SV=1;78.462	585	0.0;Transcriptome;Insolution_Sp9Female	TRINITY_DN10736_c0_g1_i1:True:67	31.000	400	0.5263157894736842;Transcriptome_Sp9Female	TRINITY_DN6751_c0_g1_i1:True:62	100.000	760	1.0;NA;NA;17;740;85067.13958;NA;NA
Uncharacterized Venom Compound Ei53;Other;Unspecific;Signal Peptide	CS pos: 21-22. Pr: 0.9696	0.9696;Stop codon present;170	Digestion Sp2;13	90.93;2	65.00;34	159.76;20	233.13;>TRINITY_DN37_c0_g2_i2:False:1525;>TRINITY_DN122_c0_g1_i6:False:1505;TTTTTTTTTTCCGAAACCACTTTTATTTCATACAGCTTAATTCATCTAAAATCCCAAAATATTCACATTAAATTACACTTGTAAGATTGCATAATGAGGGTCAAAGGGTGACATTTTCAAAGAATTCATCGTGTCCGTTTGCCAACAATATAAAGCTTTCCACAATTCTCAGTGGGAAGATTGGTATTTGTTAACAAATGTGATATTTCCCAGTCAAAGAAGTATATTTTAACAATACCTGTGGGAACATCCAGATATATAGAATTAATAAAAGCATGATTAGCCTTAGAAACGTACTTGCAGTCCTAGGAATGTCAGTGGCG…	25.210	357	0.7710583153347732;136.973;1185.94;2.00198;sp|W4VS53|CRVP_TRILK	407; CRISP/Allergen/PR-1 OS=Trittame loki OX=1295018 PE=1 SV=1;30.204	245	5.51e-25;tr|A0A224XFB5|A0A224XFB5_9SCOR	256; Putative Venom allergen OS=Megacormus gertschi OX=1843536 PE=4 SV=1;73.622	254	2.39e-138;Orbitrapmatches	Transcriptome;Insolution_Sp9Female	TRINITY_DN122_c0_g1_i6:False:1505	98.663	374	1.0;Transcriptome_Sp9Female	TRINITY_DN122_c0_g1_i6:False:1505	98.663	374	1.0;NA;NA;12;353;40776.4879;NA;NA
Uncharacterized Venom Compound Ei54;Other;Male	Expressionlevel;Signal Peptide	CS pos: 24-25. Pr: 0.9575	0.9575;Stop codon present;178	Digestion Sp2;24	85.46;NA;NA;NA;>TRINITY_DN995_c0_g1_i1:False:552;>TRINITY_DN521_c0_g1_i1:False:549;TTTTTTTTTTTTTCAACGCCTTATATTTTATTGAATTAACAGATTATAATAACAAGAAATTTTTTCGAGATTCATGTTTTGAACATTGTCGTTTTGGTGGTTCTTTTTACGGTTTTCTTCTCGAGACTTAATTGCCCTTTATCTTCGAGTGATATCCTGGCAATCTTTCAACGCAATCAGCTACTATATTTGACATCAGAGAATTCAATCTCTTATTATGTCGCAAAGGGTTAGACGCTAAACATCCATAAACTAATCTTTCCTCTTCGGTTTTTAATGGCAGCGTCATTTCACAGTTTATTCTCGTCATCTCTTT…	130; Venom protein OS=Hadrurus spadix OX=141984 PE=4 SV=1;29.412	136	4.60e-10;Transcriptome;Insolution_Sp9Female	TRINITY_DN49557_c0_g1_i1:True:31	26.733	101	0.7266187050359713;Transcriptome_Sp9Female	TRINITY_DN521_c0_g1_i1:False:549	100.000	139	1.0;NA;ProSiteProfiles	Prokaryotic membrane lipoprotein lipid attachment site profile.	5.0;6;115;13242.51613;NA;NA
Uncharacterized Venom Compound Ei55;Other;Unspecific;Signal Peptide	CS pos: 21-22. Pr: 0.9880	0.9880;Stop codon present;179	Digestion Sp2;21	85.21;9	105.98;23	70.82;9	87.68;>TRINITY_DN39624_c0_g1_i1:True:272;>TRINITY_DN6224_c0_g1_i1:True:117;TTAATAGACACAAACAAGGAGTCATCGTTTGTCTACAAATTACAGGCAAAAGCAAAGTCATTTCCTGGACTGTTATTATTCCAAAACAGGTTGACTGACGCGGGAAGTGACGTCATGTCCTTTTTGGATTCCGTCCTATCACAGCTTCCGACAGACTTCACCAATAAAGTCACATGATCACAGACACAGGTGGGTGGGCGAGTGCTTATAATAATCGAACACAGACGAAAGAAGGCAATTATTATTTCAAACGAGGAACAGACGTAAGCTAAAACATGAAAATCTATCAAGTTCTGTTGTTGGCTGTCCTTTTTGTTCTTTTGG…	100.000	151	1.0;1806.94;2019.41;1044.1;sp|Q5BLY4|ICA_APIME	224; Icarapin-like OS=Apis mellifera OX=7460 PE=2 SV=1;24.375	160	0.020;tr|A0A1B3IJ78|A0A1B3IJ78_9SCOR	151; Venom peptide Ht_186 OS=Hadogenes troglodytes OX=1577150 PE=2 SV=1;64.901	151	5.94e-55;Orbitrapmatches	Transcriptome;Insolution_Sp9Female	TRINITY_DN6224_c0_g1_i1:True:117	100.000	150	1.0;Transcriptome_Sp9Female	TRINITY_DN6224_c0_g1_i1:True:117	100.000	150	1.0;NA;MobiDBLite	consensus disorder prediction	-| MobiDBLite	consensus disorder prediction	mobidb-lite	-;0;129;14888.12822;NA;NA
Uncharacterized Venom Compound Ei56;Other;Unspecific;Signal Peptide	CS pos: 23-24. Pr: 0.9813	0.9813;Stop codon present;182_1	Digestion Sp2;37	84.19;45	194.11;32	66.37;29	124.37;>TRINITY_DN2367_c0_g1_i1:True:209;>TRINITY_DN464_c1_g3_i2:True:1;CGTATGAGAACCACTGTAAATCCTTGTAATGTTATAAACGAACGGCAAAGAATTCGGCTGAATTTATATATTTTCACAGAAAATATCAGATAAAGTTAACTTGTGAAGAGAGTTTCTCTGTAAACAAAATGTTAACCGCCATTAACGGTTATGGCAGATCGCTTATTGGCTAGAGCATTGGCCAATCAACGATTCGTATTTTCATATAAATATACGCATTAATTCTCAGTCCTAAAAATACAATCGCGAACGTTAGATCAGTTGGTATTAGTCCGAGCGAATACTTGATTACAATGAAGGTCTTGGGGTTACCAATGGTTCTTCTGG…	73; Potassium channel toxin kappa-KTx 5.1 OS=Heterometrus laoticus OX=217256 PE=1 SV=1;27.273	66	0.014;tr|A0A1W7R978|A0A1W7R978_9SCOR	67; Venom protein OS=Hadrurus spadix OX=141984 PE=4 SV=1;51.471	68	3.51e-11;Orbitrapmatches	Transcriptome;Insolution_Sp9Female	TRINITY_DN464_c1_g2_i2:False:424	100.000	63	1.0;Transcriptome_Sp9Female	TRINITY_DN464_c1_g2_i2:False:424	100.000	63	1.0;NA;NA;4;40;4588.39965;Mass: 2781.4645299999997 (NLITACSRLCHKKPIIKFCVGICPK)	PTMs: C-C	Mass: 2781.4645299999997 (NLITACSRLCHKKPIIKFCVGICPK)	PTMs: C-C;Mass: 2781.4645299999997 (NLITACSRLCHKKPIIKFCVGICPK)	PTMs: C-C	Mass: 2781.4645299999997 (NLITACSRLCHKKPIIKFCVGICPK)	PTMs: C-C
Uncharacterized Venom Compound Ei57;Enzyme;Unspecific;Signal Peptide	CS pos: 26-27. Pr: 0.9840	0.9840;Stop codon present;183_2	Digestion Sp2;15	83.05;NA;64	131.03;5	58.43;>TRINITY_DN83_c0_g2_i1:True:373;>TRINITY_DN14_c0_g1_i9:False:1387;TTTGAAACAGATCTCGCTGAAATAGCTGGTGTCTGTGGAGACTTCGTCACAAATTGAGACAGTTTGGATGTATACTTTTCCATTAGATGGGACTCACTGTACCGATCCTCGAATTGTGATGTAGCTTCCAAGTCATTATTTCTGGCGATTTTCGCGAAAATATCATCATTCACCGGGACTATTTGTAAGATTAATCACTTATTCGAACTTCCAAATTATACATCCCTACATAGTTCATCTGTCATTTCGCCATTTTTATGAAAGGTTTAATTACTTGTAATCCTATCACACGTAAGTAACCTTGCACAACCTAGCTTCACATACATT…	56.459	209	0.8818565400843882;224.411;151.628;62.8807;NA;NA;NA;tr|A0A1W7RAG1|A0A1W7RAG1_9SCOR	229; Gamma-interferon-inducible lysosomal thiol reductase OS=Hadrurus spadix OX=141984 PE=3 SV=1;53.810	210	3.13e-78;Orbitrapmatches	Transcriptome;Insolution_Sp9Female	TRINITY_DN14_c0_g1_i9:False:1387	100.000	227	1.0;Transcriptome_Sp9Female	TRINITY_DN14_c0_g1_i11:False:3025	100.000	227	1.0;NA;NA;10;201;22891.4986;NA;NA
Uncharacterized Venom Compound Ei58;Other;Unspecific;Signal Peptide	CS pos: 23-24. Pr: 0.9776	0.9776;Stop codon present;185_1	Digestion Sp2;38	81.57;43	131.42;37	61.54;28	45.18;>TRINITY_DN131_c0_g5_i2:True:17;>TRINITY_DN2280_c0_g1_i2:False:302;GTCCCGACAGGGTTTAGTATAATAGTTACACAAAAAGCTGTTATCTGATTCTTCTTGCGAATATGAAGCGTTACCTGGTAGTACTGGTTCTTCTGTTAGTGTGCGCAGTGTTGCCAGACCAGATTCGGGGTATTGAAAATGGCGGAGATTTTAACGACGAAGAATTCGCTAGATCTCGCAATCTCTGTAGAAACAAGTGCTATAAAGAATATATTCCCAAAAAGTGTGTGAAATACTGTCGGGACGTGCGCGGTGAAAAGTGATGTAAAATTGTTTCATCGAAAATAAAGATCTGGTTTTGATTTCAAAAAAAAAAAAAAAAAAAA…	73; Potassium channel toxin kappa-KTx 5.1 OS=Heterometrus laoticus OX=217256 PE=1 SV=1;33.333	72	6.49e-04;tr|A0A1B3IJ02|A0A1B3IJ02_9SCOR	79; Venom peptide HtC4Tx1 OS=Hadogenes troglodytes OX=1577150 PE=2 SV=1;55.263	38	1.77e-06;Orbitrapmatches	Transcriptome;Insolution_Sp9Female	TRINITY_DN2280_c0_g1_i2:False:302	100.000	66	1.0;Transcriptome_Sp9Female	TRINITY_DN2280_c0_g1_i2:False:302	100.000	66	1.0;NA;NA;4;43;5173.47965;NA;NA
Uncharacterized Venom Compound Ei59;Other;Male	Absence;Signal Peptide	CS pos: 18-19. Pr: 0.9830	0.9830;Stop codon present;186	Digestion Sp2;28	80.9;NA;NA;NA;>TRINITY_DN15064_c0_g1_i1:True:39;;AGCGAGCCGAATCGTTAATGTTTGGAGAACAGCATTTGAATGATGTACACTCTAAAATTGATATTAATCTCCGCAGTGGTATGCTGCGTTCTTTCTGAAACACATATTGTGGAAATAGGTCGCAGATTTTGTGCGGATACATGCAACAAGGATGGAGTTGCACATTGTGGAAACAGACTCTATCCGAAGTGGATATACACTGTCGATAAATGCTTTTCTACTGATGGAAAGGACTTGAATAGCATAGAAGAGTTCGTCAAAGTTTTCTGTAAGGAAGCTAGTAAAGAGGAACAATTGCGTATAATCACTTGTTTCTATGGTGACATGAAATCATTGTACCCAAAAGACGA…	99.153	118	1.0;17.5082;NA;17.4829;NA;NA;NA;tr|A0A1W7R996|A0A1W7R996_9SCOR	118; Venom protein OS=Hadrurus spadix OX=141984 PE=4 SV=1;31.933	119	9.40e-16;;Insolution_Sp9Female	TRINITY_DN194_c0_g1_i1:True:352	97.436	117	1.0;Transcriptome_Sp9Female	TRINITY_DN194_c0_g1_i1:True:352	97.436	117	1.0;NA;NA;8;99;11444.50325;Mass: 839.4483 (ETHIVEI)	PTMs: A	Mass: 839.4483 (ETHIVEI)	PTMs: A	Mass: 1319.56088 (NGVEECLRKNGC)	PTMs: C-C;NA
Uncharacterized Venom Compound Ei60;Other;Unspecific;Signal Peptide	CS pos: 18-19. Pr: 0.9750	0.9750;Stop codon present;187	Digestion Sp2;28	80.71;NA;NA;NA;>TRINITY_DN340_c0_g2_i2:True:162;>TRINITY_DN357_c0_g1_i1:False:718;AAACGCCAATGCAGCGGTGTTGTCGTCACAACGAGCAATGCCATATGGTAGATATAAAACACGGAAACTGGTACCGCCTTAAACACTTTTCTATTCTGCATTCACTTTAGTACAGAAGTAAAAACCGAAAAGGATTATATCAGATTTGAGAAAATAAATTGAATAATCTTCGAACCTAGCAAGGAGAATCCAGAGAAGAAAGCCATGGTGGTGTTGAAATTTGCTGCATTGTCCGCACTGTTCATTTACGTTCTATCTGACATAGATGTGCTCGATCTTGGTCGTCGATTTTGTGATACGAACAAATGCGACGAAGG…	100.000	131	1.0;9.98276;39.4467;261.135;NA;NA;NA;tr|A0A1W7R972|A0A1W7R972_9SCOR	116; Venom protein OS=Hadrurus spadix OX=141984 PE=4 SV=1;32.456	114	2.84e-09;Transcriptome;Insolution_Sp9Female	TRINITY_DN194_c0_g1_i1:True:352	26.549	113	0.9658119658119658;Transcriptome_Sp9Female	TRINITY_DN357_c0_g1_i1:False:718	100.000	117	1.0;NA;NA;8;99;11518.2265;NA;NA
Uncharacterized Venom Compound Ei61;Other;Male	Absence;Signal Peptide	CS pos: 22-23. Pr: 0.9805	0.9805;Stop codon present;188_1	Digestion Sp2;29	79.98;NA;NA;NA;>TRINITY_DN950_c0_g1_i2:False:657;;TTTTTTTTTTTGTTTCGTTTATATTTTATTCCCTTTATAGCATTTTCTACATTATTGTTAGAGTTTTCACATCTTTCGTTCCCTAAGTTTAAATATATTAAATGAATCCAATCTCAATTCAAACACCTATGATTAACGTTAAGATACATGAAACCAAATGATAAAACATTTATGTTATAAGAAAATATATCATATTTTGTATTTGAGATCACTATTTATGAATTTTTCTCATGGCAGGTTTTCCCAATACGTTGTCATTTTAGTCTGGCTCTTAAGATATCCCTTGGAATTCAAATCTACTCTCCACACATCCTATCATTGGATTAGGTGCATTTCGTATGGGCTGTAC…	131; Venom protein OS=Hadrurus spadix OX=141984 PE=4 SV=1;33.333	120	1.84e-19;;Insolution_Sp9Female	TRINITY_DN49557_c0_g1_i1:True:31	37.815	119	0.9444444444444444;Transcriptome_Sp9Female	TRINITY_DN44947_c0_g1_i1:False:309	100.000	85	0.6746031746031746;NA;NA;6;104;11834.54536;NA;NA
Uncharacterized Venom Compound Ei62;Other;Male	Expressionlevel;Signal Peptide	CS pos: 20-21. Pr: 0.9692	0.9692;Stop codon present;205	Digestion Sp2;22	68.17;NA;NA;NA;>TRINITY_DN1954_c0_g1_i1:True:13;>TRINITY_DN843_c1_g1_i1:True:1;CAGATTTTGATAGATGATGAAGCTGGTATTCATCGCAGTTACTTTGGCAGCCCTTCTTTTATTCTTGTCATGTAAGAACATAAGTTGCCATCGTTTATCTTCATCGCAATGGCAATATATTTGTGACATCCCAAATTCATCGGACGAAGAATGCGTACAGCTTTCAAACTGTTTCTTTTCCGAAATGAAATCTCACGCTGTTATTGAGGAACTCAACGATCTTCGAAATTGTACTGGAAAAGATTTTAAAGAGATAATGAGAATAACATGTTCATTCAGGCTGCCAGTAGACACTGAAGAGGAAAAACTATTTTTTGAGT…	130; Venom protein OS=Hadrurus spadix OX=141984 PE=4 SV=1;29.104	134	1.08e-07;Transcriptome;Insolution_Sp9Female	TRINITY_DN1749_c0_g1_i1:False:1592	24.603	126	0.8289473684210527;Transcriptome_Sp9Female	TRINITY_DN843_c1_g1_i1:True:1	100.000	151	0.993421052631579;NA;ProSiteProfiles	Prokaryotic membrane lipoprotein lipid attachment site profile.	5.0;8;132;15531.65638;NA;NA
Uncharacterized Venom Compound Ei63;Other;Unspecific;Signal Peptide	CS pos: 16-17. Pr: 0.8111	0.8111;Stop codon present;207_1	Digestion Sp2;16	65.2;NA;10	38.91;NA;>TRINITY_DN268_c0_g1_i1:True:38;>TRINITY_DN75_c0_g1_i5:False:2005;GGAACGCATTCAAATCCGGTTTCTCAGGAACTGACTAAACAGCCATAATCATGGCGATTAGCAGTATAATAATATTGATTTCTCTCTCTCTATACAGCGTTTCTACCGAAGGGGACAGCCGACTGGCGGAAAGCATGGAGAAACACAAGGTTGTGCCAGATGTAATTGAAACTGCCCCACAACAGGTCATTGAGGTTCAGTATGGAAGTTTGTCTGTAAATCAAGGTAATGAATTGACTCCAACACAAGTTAAAGATCCTCCAACACACATCAGTTATCCAACAGAAGAAGGTGGTCTTTATACATTATGCATGACAGATCCTG…	100.000	211	1.0;15.8605;24.6725;43.9662;NA;NA;NA;tr|A0A1W7RAP7|A0A1W7RAP7_9SCOR	179; Protein D3 OS=Hadrurus spadix OX=141984 PE=4 SV=1;86.441	177	3.04e-116;Orbitrapmatches	Transcriptome;Insolution_Sp9Female	TRINITY_DN75_c0_g1_i3:False:1960	100.000	207	1.0;Transcriptome_Sp9Female	TRINITY_DN75_c0_g1_i3:False:1960	100.000	207	1.0;NA;NA;1;191;21594.69333;NA;NA
Uncharacterized Venom Compound Ei63_variant;Other;Unspecific;Signal Peptide	CS pos: 31-32. Pr: 0.9794	0.9794;Stop codon present;207_2	Digestion Sp2;15	65.2;NA;10	38.91;NA;>TRINITY_DN268_c0_g1_i5:True:88;>TRINITY_DN75_c0_g1_i5:False:2005;CGCTTTATAATGCGGCACTGCCACAAACTGTCGTGTAGTGTTACGTAAGGGCTCGACGCAATCAGGCGATTCAGTTACTCTCTTATAAATATTCCATCGCTCATTAGTGATGGTGAACACTATGATCTTCAGTTGTTGCAATATGTTGTATTTGCTGTGCCTTGCTTTTACTGTCCAACTTTCGTTTCCAAGCGTTTCTACCGAAGGGGACAGCCGACTGGCGGAAAGCATGGAGAAACACAAGGTTGTGCCAGATGTAATTGAAACTGCCCCACAACAGGTCATTGAGGTTCAGTATGGAAGTTTGTCTGTAAATCAAGGTAA…	100.000	226	1.0;9.25146;24.6725;58.8445;NA;NA;NA;tr|A0A1W7RAP7|A0A1W7RAP7_9SCOR	179; Protein D3 OS=Hadrurus spadix OX=141984 PE=4 SV=1;86.441	177	9.83e-116;Orbitrapmatches	Transcriptome;Insolution_Sp9Female	TRINITY_DN75_c0_g1_i5:False:2005	100.000	219	1.0;Transcriptome_Sp9Female	TRINITY_DN75_c0_g1_i5:False:2005	100.000	219	1.0;NA;NA;1;188;21307.54521;NA;NA
Uncharacterized Venom Compound Ei64;Other;Unspecific;Signal Peptide	CS pos: 20-21. Pr: 0.9819	0.9819;Stop codon present;208_2	Digestion Sp2;13	63.8;36	91.45;32	94.36;67	170.13;>TRINITY_DN84_c0_g1_i1:True:131;>TRINITY_DN7160_c0_g1_i2:True:129;GGAAAGAAGCGGCCGATCAGAGTTTTCAGGTGTTGCTCGGACTAGCCTGTGCACGTGATGCGGACGGTATAAATATGAGCGAAGATCGGTGATCTCTTCACTTCACCACATTGTCGTTTTTGGGTGACTAGGAAGGACGACCTTTAGCCAGTAACTGGATTGAGAAGAGTGTTAAAGTGTTCCTCCATCTCTCAAGAATGTCCTTCTCCTTGGTCAGAAATGTACCATTCAAACTTTTTACAGTTCTAGTTGTACGCGACTTCCTACCTCGAAGGTTGTTTAATATCATGAGGTGGACAACGCAAATTGCAATGATGCTGTTATGC…	95.690	116	1.0;70.3486;16.2201;4.49509;sp|A0A0F7YZQ7|CELE_CONVC	101; Elevenin-Vc1 OS=Conus victoriae OX=319920 PE=1 SV=1;70.000	20	4.81e-04;tr|A0A7R8Z481|A0A7R8Z481_TIMDO	136; Hypothetical protein OS=Timema douglasi OX=61478 GN=TDIB3V08_LOCUS395 PE=4 SV=1;34.351	131	8.21e-06;Orbitrapmatches	Transcriptome;Insolution_Sp9Female	TRINITY_DN7160_c0_g1_i4:True:133	100.000	107	1.0;Transcriptome_Sp9Female	TRINITY_DN7160_c0_g1_i3:True:88	100.000	107	1.0;NA;NA;2;87;10114.80598;NA;NA
Uncharacterized Venom Compound Ei65;Other;Unspecific;Signal Peptide	CS pos: 22-23. Pr: 0.9823	0.9823;Stop codon present;210	Digestion Sp2;13	63.4;14	52.73;14	81.18;34	133.10;>TRINITY_DN2022_c3_g1_i1:True:63;>TRINITY_DN1164_c0_g4_i1:True:296;CCAATCGAGTTCGTAGTTTTTTATTGGAAACGTAACAAATTATTTATGAGGCTCGAAATATAAGTACAGAAGATACAGCTTCGAGATTGTTATATTTATTGTTTTTTCAATGCCAGACATATGAAGCTGAAAACAGTTCTAGTCATATTTCTCATCTGTATGTTAGCTGTCGATTTGGCAGTCGCTAGATGTTACCCTAAAAAGAAATCGACGATTCGAAGAATAATGAAAGCAATTCCTAAGACCATTAAAATCATCAAAGCCATGAAGACAGTGAGGAAAATAAGAAGAATGAAGAAACTAAAAAGGAAAATAAGTCAATGCC…	79; Venom peptide HtC2Tx1 OS=Hadogenes troglodytes OX=1577150 PE=2 SV=1;52.778	72	5.73e-11;Orbitrapmatches	Transcriptome;Insolution_Sp9Female	TRINITY_DN1164_c0_g4_i1:True:296	98.684	76	1.0;Transcriptome_Sp9Female	TRINITY_DN1164_c0_g4_i1:True:296	98.684	76	1.0;NA;NA;2;54;6379.88082;NA;NA
Uncharacterized Venom Compound Ei66;Other;Male	Absence;Signal Peptide	CS pos: 18-19. Pr: 0.9826	0.9826;Stop codon present;213	Digestion Sp2;11	62.44;NA;NA;NA;>TRINITY_DN1472_c0_g1_i15:True:2;;GAGTTCTGATCGTATCAGTGTTGTCATCTGGCAAAATGTCTATCGTTGCAATTGTTAGCTTAGCTTTAGCTGTCTCCGTAGTTGATGCTACCAACTGCGTAGCTGAACAGACAACAGCAGATTGCAGTTGTCAGGACAGCGAAACTGTTCTTGGTACTATAGAAATTCGTTGCATTATAACCGATGTGGATCAACTCAACGCTTTATCTAACAGCGACCACAGTCCGAATATATCCAAACTTGTGATTACTCTCGAAGGTATTGACACTTTGCCTTCTTCACTACTCAGATTTAGCAATCTTACCACACTTGACATTAGAGGACCCGACTTGACTTCCATACAAGAAGAT…	32.558	301	0.587890625;348.206;NA;7.10208;tr|A0A4D5RTY2|A0A4D5RTY2_IXOSC	2078; Non-specific serine/threonine protein kinase (Fragment) OS=Ixodes scapularis OX=6945 PE=4 SV=1;30.189	106	1.90e-04;tr|A0A1Y1N1E5|A0A1Y1N1E5_PHOPY	686; Uncharacterized protein OS=Photinus pyralis OX=7054 PE=4 SV=1;30.986	284	4.91e-25;;No hits in Other Sex;Transcriptome_Sp9Female	TRINITY_DN59155_c0_g1_i1:True:2	100.000	96	0.23645320197044334;GO:0005515: protein binding (molecular_function);SUPERFAMILY	L domain-like	2.35E-41| Pfam	Leucine rich repeat	PF13855	4.4E-7| Pfam	Leucine rich repeat	PF13855	3.8E-7| Pfam	Leucine rich repeat	PF13855	7.8E-15| ProSiteProfiles	Leucine-rich repeat profile.	PS51450	7.835| ProSiteProfiles	Leucine-rich repeat profile.	PS51450	6.457| PRINTS	Leucine-rich repeat signature	PR00019	4.2E-5| PRINTS	Leucine-rich repeat signature	PR00019	4.2E-5| ProSiteProfiles	Leucine-rich repeat profile.	PS51450	6.403| ProSiteProfiles	Leucine-rich repeat profile.	PS51450	6.087| Gene3D	Ribonuclease Inhibitor	G3DSA:3.80.10.10
Uncharacterized Venom Compound Ei67;Other;Male	Expressionlevel;Signal Peptide	CS pos: 21-22. Pr: 0.9837	0.9837;Stop codon present;226_5	Digestion Sp2;10	54.73;NA;NA;NA;>TRINITY_DN4_c0_g1_i3:False:547;>TRINITY_DN923_c0_g1_i2:True:20;TTTTTTTTTTTTTCAAATAATTAATGCATTTATTGAAGCAATCTGATAGAAATTATCTGGTACAAAATACCATTTGCTACTATCTTCAAATCATGGAACAGGCTATCTTCGCTACTACCTTACTCATCAGTGTGTGCTTGCATCATTGCATGAAATTCAGGCATATTCTCTATGCATTTCACCACAGGATGAGGTTCAGTGCTCGGCTCACTAAACTCTTTGCTATAGCAGGACGTAATAAGATCTCTCGTTTCATTTTTCATCATAGGAAACATGCAGATATTTTCGAGAATATCAACTTGGCTCATGCTGGTGCATTC…	131; Venom protein OS=Hadrurus spadix OX=141984 PE=4 SV=1;37.692	130	6.73e-20;Transcriptome;Insolution_Sp9Female	TRINITY_DN49557_c0_g1_i1:True:31	38.710	124	0.96875;Transcriptome_Sp9Female	TRINITY_DN923_c0_g1_i2:True:20	100.000	128	1.0;NA;NA;6;107;12483.70158;NA;NA
Uncharacterized Venom Compound Ei68;Other;Unspecific;Signal Peptide	CS pos: 20-21. Pr: 0.9807	0.9807;Stop codon present;229	Digestion Sp2;14	53.97;NA;22	77.05;18	98.88;>TRINITY_DN36_c0_g2_i1:True:2;>TRINITY_DN2_c0_g1_i6:True:60;TTCATGCAGAAAAAATTTCTAGTTATTTAAACAGCTTCTGTTCCCAGAGTATAAAAACCGTCATAAAAACTACAGATCACACTAGTCGAAGCCAACCTACAGCATCAAGCATAATGAAGACCGTTTTCATTTTGATTCTGCTGGCTATTACCATCGTTGCAATAGCTAATGCGTTTGAGTGCGAGGATGATGGAGAATTCCAGGATCCTGACGACTGTACAAGTTTCATCATTTGCTATAACAAAACAGCCAGTCCACCAGTTAAATGCGGAACGGGGCTTAACTATGACGACGTGAGGAAATTATGCAACTTGCCCGAGCAAGTGAAGTGTA…	123; chondroitin proteoglycan 2-like OS=Actinia tenebrosa OX=6105 GN=LOC116308100 PE=4 SV=1;31.646	79	6.77e-05;tr|A0A1B3IJ08|A0A1B3IJ08_9SCOR	80; Venom peptide HtC6Tx1 OS=Hadogenes troglodytes OX=1577150 PE=2 SV=1;55.844	77	5.49e-19;Orbitrapmatches	Transcriptome;Insolution_Sp9Female	TRINITY_DN2_c0_g1_i6:True:60	100.000	79	1.0;Transcriptome_Sp9Female	TRINITY_DN2_c0_g1_i6:True:60	100.000	79	1.0;NA;NA;6;59;6507.86256;NA;NA
Uncharacterized Venom Compound Ei69;Other;Male	Expressionlevel;Signal Peptide	CS pos: 30-31. Pr: 0.9787	0.9787;Stop codon present;249	Digestion Sp2;12	44.9;NA;NA;NA;>TRINITY_DN1120_c0_g1_i1:False:579;>TRINITY_DN25199_c0_g1_i3:False:371;TTTTTTTTTTAATACGAAAAGGTAATGCTTTTTATTTAGTTCTGAATTAAAGTAGTCAGGAATACAAATTCCAGACGGTTAATTCAACGACTGTTAAATACTTTAATCATTTATTAGTATGAACGAAATGTTGTTAGACAAGTAAATACAAGAATAAATTAATAACATTTAATGATATTTTGCAACAAATGCAGCGTTTTGATCTCAATAATTCGCAGAAAGTTTATCTTTTAGATGGCGGCTAAAAGCCATCTAAAAGATGGCTTTATTTGCAAACGTATACAAAACTCGATGTGGACAGTTGTTCTCCGTCA…	100.000	104	1.0;1034.68;6.58396;14.7484;NA;NA;NA;tr|A0A2R5LF41|A0A2R5LF41_9ACAR	104; Putative secreted protein (Fragment) OS=Ornithodoros turicata OX=34597 PE=4 SV=1;36.957	92	5.03e-12;Transcriptome;No hits in Other Sex;Transcriptome_Sp9Female	TRINITY_DN25199_c0_g1_i3:False:371	100.000	103	1.0;NA;NA;6;73;8340.9517;NA;NA
Uncharacterized Venom Compound Ei69_variant;Other;Male	Absence;Signal Peptide	CS pos: 30-31. Pr: 0.9787	0.9787;Stop codon present;249_1	Digestion Sp2;12	44.9;NA;NA;NA;>TRINITY_DN1120_c0_g1_i5:False:552;;TTTTTTTTTTAATACGAAAAGGTAATGCTTTTTATTTAGTTCTGAATTAAAGTAGTCAGGAATACAAATTCCAGACGGTTAATTCAACGACTGTTAAATACTTTAATCATTTATTAGTATGAACGAAATGTTGTTAGACAAGTAAATACAAGAATAAATTAATAACATTTAATGATATTTTGCAACAAATGCAGCGTTTTGATCTCAATAATTCGCAGAAAGTTTATCTTTCAGATGGCGGCTTGCAACGGTATATGAAACTCGATGTGGATACTTGTTCTCGGTGACTAATGCACTCTGTACCTTCTTCGCATACACAAGTGCTAGCAACATACTCCAGCATTCTGCG…	93.269	104	1.0;565.081;NA;14.7484;NA;NA;NA;tr|A0A2R5LF41|A0A2R5LF41_9ACAR	104; Putative secreted protein (Fragment) OS=Ornithodoros turicata OX=34597 PE=4 SV=1;37.500	96	2.87e-14;;No hits in Other Sex;Transcriptome_Sp9Female	TRINITY_DN25199_c0_g1_i3:False:371	93.204	103	0.9537037037037037;NA;NA;6;78;9060.27287;NA;NA
Uncharacterized Venom Compound Ei70;Other;Male	Absence;Signal Peptide	CS pos: 21-22. Pr: 0.9652	0.9652;Stop codon present;253	Digestion Sp2;14	43.81;NA;NA;NA;>TRINITY_DN3594_c0_g1_i3:True:293;;ATGTTTCTCACAAAACAGGGCTTCACGACAGGTAATGAATGTCAAGGACCAATCGTCTCTATTTTTTGAAACGTCGTCATGGCGTAAATTATACAGAAATGAATAGAAAACAACATACCAGTTTTCTGTCGTTGCTTAATCAAGGATTCCTTTAAAAAGACAAACCGGTAGGGAGAACATAACCTTGCGCAGTTCATCGAAATATTCCGACGTCTCCGTATTAAGATTTCCTTAATCCAAGCTGTCGGAAGTTTTTATTCGAGGCAACTCTTGTTTCTTCCAACGAAGCCTAGATTACGCAACGGCATAGAACCCGGAACCTTGCTTCCTGTTCGTTTCCGTATAAATT…	93.269	104	0.7819548872180451;1.94738;NA;111.8;sp|G4V4G1|IGFBP_CUPSA	262; Insulin-like growth factor-binding protein-related protein 1 OS=Cupiennius salei OX=6928 PE=2 SV=1;34.375	64	3.73e-07;tr|A0A224XG57|A0A224XG57_9SCOR	120; Putative venom gland protein OS=Megacormus gertschi OX=1843536 PE=4 SV=1;63.636	77	2.15e-28;;Insolution_Sp9Female	TRINITY_DN1435_c0_g1_i1:False:1474	38.095	63	0.9692307692307692;Transcriptome_Sp9Female	TRINITY_DN583_c0_g3_i1:False:437	95.385	65	1.0;NA;NA;9;44;4740.1054;NA;NA
Uncharacterized Venom Compound Ei70_variant;Other;Male	Absence;Signal Peptide	CS pos: 21-22. Pr: 0.9794	0.9794;Stop codon present;253_1	Digestion Sp2;11	43.81;NA;NA;NA;>TRINITY_DN3594_c0_g1_i6:True:130;;TTTCTGTCATTTTTATTTGTATTTGAGTGAACGGTTGGCATTTTAAAAAACTTACTGTTACGCTCTCATATATACCTATATGGCTTATTTCCGGAATCACATATGCAGGATCTAATAGTTGGAAGCCTAGATTACGCAACGGCATAGAACCCGGAACCTTGCTTCCTGTTCGTTTCCGTATAAATTCATCCCGTCGTTTCAAAGAATACGTTCATTACCTGTTGAGAAACCCTGTTTTGTGAGAAACATGGCGAGCAAATTGTATTTGATTAGTTTTGTGCTACTCGGTGTCTTCACGGGGATGTTGGCTCTCAGATGTAGACAGTGTGGCACGTACGAGTGTAGTCCT…	97.744	133	1.0;0.842836;NA;111.8;sp|P0CJ14|VP302_LYCMC	94; Venom protein 302 OS=Lychas mucronatus OX=172552 PE=2 SV=1;52.542	59	3.55e-15;tr|A0A224XG57|A0A224XG57_9SCOR	120; Putative venom gland protein OS=Megacormus gertschi OX=1843536 PE=4 SV=1;64.948	97	1.04e-39;;Insolution_Sp9Female	TRINITY_DN1435_c0_g1_i1:False:1474	40.984	61	0.648936170212766;Transcriptome_Sp9Female	TRINITY_DN583_c0_g3_i1:False:437	97.872	94	1.0;NA;NA;12;73;7839.67346;NA;NA
Uncharacterized Venom Compound Ei71;Other;Male	Absence;Signal Peptide	CS pos: 24-25. Pr: 0.9802	0.9802;Stop codon present;266	Digestion Sp2;11	38.42;NA;NA;NA;>TRINITY_DN995_c0_g2_i3:False:730;;ACTGACTTAAATATAGCGGATAATTAAATGAAAATTCTCAATTTTCAGAACAGCTATCTCGAAATTATTATCTGAAAGCACATCTGATTTTAATTTGTCTCCTTTTCTCGTCACATATTTTGTCTTTCAAATTTTAATGCACATTTAAACTGCAATATATTTGATTTGAAACAATGCTCTTTTACGAGAAACAATGTATTTCATGTGGCAAAATATTCCTTGTTTGTCCTGCCTAACAGGCAGACAAGTGAAATAATATTGCATATAAAAAATCACAATTGAATATTTATACAGCTAACTCGTGATGCATTGTAAATAACATCCAGATAAATGTTGCTATGTATTTGCT…	130; Venom protein OS=Hadrurus spadix OX=141984 PE=4 SV=1;28.037	107	9.73e-06;;No hits in Other Sex;Transcriptome_Sp9Female	TRINITY_DN521_c0_g2_i1:False:553	100.000	112	0.9655172413793104;NA;NA;6;92;10525.5236;NA;NA
Uncharacterized Venom Compound Ei72;Other;Male	Absence;Signal Peptide	CS pos: 21-22. Pr: 0.8442	0.8442;Stop codon present;276	Digestion Sp2;14	34.91;NA;NA;NA;>TRINITY_DN3594_c0_g1_i1:True:130;;TTTCTGTCATTTTTATTTGTATTTGAGTGAACGGTTGGCATTTTAAAAAACTTACTGTTACGCTCTCATATATACCTATATGGCTTATTTCCGGAATCACATATGCAGGATCTAATAGTTGGAAGCCTAGATTACGCAACGGCATAGAACCCGGAACCTTGCTTCCTGTTCGTTTCCGTATAAATTCCTCTCGTCGTTTCAAAGAATACATTCATTACCTGTTGAGAAGCCCTGTTTTGTGAGAAACATGGCGAGCAAATTGTATTTGATTAGTTTTGTGCTACTCGGTGTCTTCACGGGGATGTTGGCTCTCAGATGTAGACAGTGTGGCACGTACGAGTGTAGTCCT…	94.231	104	0.7819548872180451;6.49727;NA;111.8;sp|G4V4G1|IGFBP_CUPSA	262; Insulin-like growth factor-binding protein-related protein 1 OS=Cupiennius salei OX=6928 PE=2 SV=1;35.938	64	2.11e-08;tr|A0A224XG57|A0A224XG57_9SCOR	120; Putative venom gland protein OS=Megacormus gertschi OX=1843536 PE=4 SV=1;64.935	77	5.51e-30;;Insolution_Sp9Female	TRINITY_DN1435_c0_g1_i1:False:1474	38.095	63	0.9692307692307692;Transcriptome_Sp9Female	TRINITY_DN583_c0_g3_i1:False:437	96.923	65	1.0;NA;NA;9;44;4724.0741;NA;NA
Uncharacterized Venom Compound Ei72_variant;Other;Unspecific;Signal Peptide	CS pos: 21-22. Pr: 0.9768	0.9768;Stop codon present;276_2	Digestion Sp2;11	34.91;NA;NA;NA;>TRINITY_DN3594_c0_g1_i4:True:130;>TRINITY_DN583_c0_g3_i1:False:437;TTTCTGTCATTTTTATTTGTATTTGAGTGAACGGTTGGCATTTTAAAAAACTTACTGTTACGCTCTCATATATACCTATATGGCTTATTTCCGGAATCACATATGCAGGATCTAATAGTTGGAAGCCTAGATTACGCAACGGCATAGAACCCGGAACCTTGCTTCCTGTTCGTTTCCGTATAAATTCATCCCGTCGTTTCAAAGAATACGTTCATTACCTGTTGAGAAGCTCTGTTTTGTGAGAAACATGGCGAGCAAATTGTATTTGATTAGTTTTGTGCTACTCGGTGTCTTCACGGGGATGTTGGCTCTCAGA…	99.248	133	1.0;24.0519;48.9732;111.8;sp|P0CJ14|VP302_LYCMC	94; Venom protein 302 OS=Lychas mucronatus OX=172552 PE=2 SV=1;53.448	58	6.85e-15;tr|A0A224XG57|A0A224XG57_9SCOR	120; Putative venom gland protein OS=Megacormus gertschi OX=1843536 PE=4 SV=1;65.979	97	3.38e-41;Transcriptome;Insolution_Sp9Female	TRINITY_DN1435_c0_g1_i1:False:1474	44.000	50	0.5319148936170213;Transcriptome_Sp9Female	TRINITY_DN583_c0_g3_i1:False:437	98.936	94	1.0;NA;NA;12;73;7823.64216;NA;NA
Uncharacterized Venom Compound Ei73;Other;Male	Absence;Signal Peptide	CS pos: 23-24. Pr: 0.9814	0.9814;Stop codon present;285	Digestion Sp2;15	31.32;NA;NA;NA;>TRINITY_DN90_c0_g1_i2:True:7;;GATCTAGTTAACCACGCCTCTAAAGACCAATCTTCATATAATCCTCGCACCAGCCAAAGTTTTTAAAGAAGTTGTAGAAACATATCGGAAAGAGATGAATTGTTTAAAAATATTTTTAAAGCTTATAATAGCATTGTCTTTGTTTATTTTGATAACTGAGTCTACAATAAGCCACTTGGTTGAAGTTGCTGGCGGGAAATGCCGATTTGACGGGCACGACTACACTGAAGGTTATTCATACCATGAAGAGGAATGCAAGCGATTCCATTGCAATATTACCAGGGAAGGATATCGTGGTGGAACTTTTTTAATAGAATTTTGCAGTGGAGGCGGAACTATTGGTAATATTACTT…	27.826	115	0.8646616541353384;886.388;NA;470.278;tr|T1J633|T1J633_STRMM	122; SVWC domain-containing protein OS=Strigamia maritima OX=126957 PE=3 SV=1;32.381	105	4.98e-06;tr|A0A1W7R9A9|A0A1W7R9A9_9SCOR	107; Venom protein OS=Hadrurus spadix OX=141984 PE=4 SV=1;35.922	103	6.89e-12;;No hits in Other Sex;Transcriptome_Sp9Female	TRINITY_DN2235_c0_g1_i4:True:0	94.444	108	1.0;NA;NA;8;85;9374.17199;NA;NA
Uncharacterized Venom Compound Ei73_variant;Other;Male	Expressionlevel;Signal Peptide	CS pos: 23-24. Pr: 0.9786	0.9786;Stop codon present;285_1	Digestion Sp2;14	31.32;NA;NA;NA;>TRINITY_DN90_c0_g1_i1:True:93;>TRINITY_DN2235_c0_g1_i3:True:1;TTACAGGTTTTTAGATTGCATTTAGAAGTTCATGTTAAAAGCAGCTCTTATTTCCACTGGAAAACAAATTTCATCCAATACGTTCTGATCTAGTTAACCACGCCTCTAACGACTAAACATCATATAATCCAAGCACCAGCCAAAATCTTGAAAGAAGTGGCAGAAATATATGAGAAAGAGATGAATTGTTTGAGAATACTTTTAAATCTCATAATTACATTGTCTTTGTTTATTTTGATTACCGAGAGTACAATACGCTACGCGGTTTGGGTTGTTAATGGGAAATGCCGATTTGACGGGCACGACTACACTGAAGGTTAT…	30.769	117	0.8796992481203008;1812.78;8.58898;470.278;tr|T1J633|T1J633_STRMM	122; SVWC domain-containing protein OS=Strigamia maritima OX=126957 PE=3 SV=1;28.571	105	0.015;tr|A0A1W7R9A9|A0A1W7R9A9_9SCOR	107; Venom protein OS=Hadrurus spadix OX=141984 PE=4 SV=1;37.864	103	9.56e-14;Transcriptome;No hits in Other Sex;Transcriptome_Sp9Female	TRINITY_DN2235_c0_g1_i3:True:1	100.000	109	1.0;NA;NA;8;86;9575.40372;NA;NA
Uncharacterized Venom Compound Ei74;Other;Unspecific;Signal Peptide	CS pos: 22-23. Pr: 0.9800	0.9800;Stop codon present;41	Reduced Sp2;NA;29	106.76;28	71.78;41	274.70;>TRINITY_DN298_c0_g1_i1:False:446;>TRINITY_DN262_c0_g1_i4:True:149;TTTTTTTTTTTTGCTGTGCAACAAAATTGTTTATTTCTTTAACGAACTTATGCTTTTAAGTAATATTTGGCAAAAGGACAGGGTAGGCTATTAATAACGTTAAACTATTAGTTAATTGTAATTCATAGAATTCAAAAGGGCGTCCATAGCTGCAACTTCTTCCTCGTTAGAGTCACCTAACGTTTTCTGAGCGTAATTCCTCACCGCCTTTCCAGCCATTCTCCTCAAGTCCTTGCCTAGTTTTGATTTCCACGCTCTGGATGCCAGCGATTTGAGTCTTCCGAACCAACCCGCTTCGGCTTGTTCCGTCACGAGCAATGCAACG…	81; Venom protein HGE029 OS=Hoffmannihadrurus gertschi OX=380989 PE=3 SV=1;52.500	80	4.77e-20;tr|A0A224X3Y3|A0A224X3Y3_9SCOR	81; Putative Non Disulfide Bridge Peptide OS=Megacormus gertschi OX=1843536 PE=4 SV=1;76.923	78	1.42e-34;Orbitrapmatches	Transcriptome;Insolution_Sp9Female	TRINITY_DN262_c0_g1_i3:True:149	100.000	81	1.0;Transcriptome_Sp9Female	TRINITY_DN262_c0_g1_i3:True:149	100.000	81	1.0;NA;NA;0;59;6616.36954;NA;NA
Uncharacterized Venom Compound Ei75;Other;Male	Absence;Signal Peptide	CS pos: 17-18. Pr: 0.9841	0.9841;Stop codon present;49	Reduced Sp2;NA;25	98.16;NA;NA;>TRINITY_DN38874_c0_g1_i1:False:834;;TTATAATTTATATTTTATATGTATTTTTTTGTTGTGTGAATTATTTAATCTTTTTTTTTTTTTTTCACATAAAATAGTTTTCACTTTATTTTCTGGATAACTGATACATTGGACAAGGTAAAATCATTTGCAGCAAAATTCCTTTAATACTTCCCCAATTCAACTCAAAATAGTACATTCTGTAACAAACCAGGGCATTTTTCTAATAAATATTGATGATTTTTTACGTATCAGTGACCTCGTTTTATGATTCTTGCTTTGTAGGAATGAGAATTTCGATGCTGTATATTATTTTAATATATCCAGGTCACACGCTGCTGATATTTTTAACTATTTTCATCGAAACTATA…	97.170	106	1.0;172.214;NA;25.8304;NA;NA;NA;tr|A0A1W7R988|A0A1W7R988_9SCOR	95; Venom protein OS=Hadrurus spadix OX=141984 PE=4 SV=1;51.042	96	3.70e-28;;Insolution_Sp9Female	TRINITY_DN282_c0_g1_i1:False:793	96.875	96	1.032258064516129;Transcriptome_Sp9Female	TRINITY_DN282_c0_g1_i1:False:793	96.875	96	1.032258064516129;NA;NA;4;76;9027.49318;NA;NA
Uncharacterized Venom Compound Ei76;Other;Male	Expressionlevel;Signal Peptide	CS pos: 23-24. Pr: 0.9817	0.9817;Stop codon present;59	Reduced Sp2;NA;35	79.11;NA;NA;>TRINITY_DN176_c0_g2_i1:False:1117;>TRINITY_DN110_c0_g3_i1:False:322;GATAAGTCCAGACAAAACACTTCTTGCTTATTGGCAAGATTGCTTGGGGTAACTCCGAAAAGGTTCCTTACCAAGATAAGTAAAATCAAATTCTATTCATCTACAGAACTTGTGGTAATTCTTAATTTTATAGCAGGGCATCTTTCACAACATAGTATTTTCTCACTATTCCTAAAAGAAATGTGATTCTATCATTCAAGGCAACCCCTGTATAGAAAAAGATTTTCATAACAATTAGACTCGAATCACTACTAATCGAAGACTTTCTTACTAAATAAGGATTACTACTCTTCATCTCAAGTGCTTTGTAAATCCATT…	73; Potassium channel toxin kappa-KTx 5.1 OS=Heterometrus laoticus OX=217256 PE=1 SV=1;43.478	23	0.076;tr|A0A1B3IJB0|A0A1B3IJB0_9SCOR	61; Venom peptide Htgkr5 OS=Hadogenes troglodytes OX=1577150 PE=2 SV=1;52.000	50	4.18e-07;Transcriptome;Insolution_Sp9Female	TRINITY_DN110_c0_g1_i1:False:1986	63.333	60	1.0;Transcriptome_Sp9Female	TRINITY_DN110_c0_g3_i1:False:322	100.000	60	1.0;NA;NA;0;37;4477.19;NA;NA
Uncharacterized Venom Compound Ei77;Other;Unspecific;Signal Peptide	CS pos: 25-26. Pr: 0.9838	0.9838;Stop codon present;63	Reduced Sp2;NA;20	75.09;5	25.84;14	69.48;>TRINITY_DN18350_c0_g1_i1:True:2;>TRINITY_DN43322_c0_g1_i1:False:779;GGTCTCCACAGATCCTGGGAGCCGATAGGACCCTAGAATTCTCCGAATTAATCGATCTCTTGGTAAAGCTCGAAATTTTCGCAAAGGTCATGATGTACCAGAAATCAACCGCTTTGACTCTGTGTATAGTTTTGGTTTTGGCTACGATGACATCACTGTCTGCAGCAGCTGCTGTTCGACAGCCCGCCACGAGGTCGAGAAGAGCAATTGTCGAAGTTGACAACCCCGACGAGACTATTCGAATTCTGGGCAGACTTGCAGAAAATATATTGCAGGCAGCAGAAATCGAAGAGAAGCTACACAGCGAAAAGAGAGGATTGGATC…	100.000	146	0.9931972789115646;14.2371;71.9112;43.0326;sp|P0CJ11|VP55_LYCMC	74; Venom protein 55.1 OS=Lychas mucronatus OX=172552 PE=3 SV=1;58.537	41	6.43e-10;tr|A0A087UI30|A0A087UI30_STEMI	110; Diuretic hormone class 2 (Fragment) OS=Stegodyphus mimosarum OX=407821 GN=X975_01119 PE=4 SV=1;60.396	101	1.15e-33;Orbitrapmatches	Transcriptome;Insolution_Sp9Female	TRINITY_DN43322_c0_g1_i1:False:779	100.000	116	1.0;Transcriptome_Sp9Female	TRINITY_DN43322_c0_g1_i1:False:779	100.000	116	1.0;NA;NA;0;91;9825.2139;NA;NA
Uncharacterized Venom Compound Ei78;Other;Unspecific;Signal Peptide	CS pos: 22-23. Pr: 0.9811	0.9811;Stop codon present;95_1	Reduced Sp2;NA;14	42.64;60	75.44;56	188.63;>TRINITY_DN330_c0_g2_i2:False:438;>TRINITY_DN95_c0_g1_i2:True:105;GATTAGGCAAAATCTATTATTGTATATATCTTTTTGAGAAGAAAATCAATCAAACAAGTTATAATTTATAACACACACTTTGTAATTACAGCAAATGAAACGAATGATTTATCGGATTTATTTTTATGTCAAATTACATAATGAATTAAGTAAAATCCATTACGAAGGTTGTTTCCAGATTGAATTATGTTGTTGCACAGATTTTCTAACTGCGGTACAGGGCATCCACAAGTTCGTCCAGTGTCGCTTCTGGTGCCGCTTCAGGTGCAACAAGATTGCTAATTGCACCAGCTGCCTGCTTTCGCAGTGACTTTCCTAATTTAGAC…	83; Vejovine OS=Vaejovis mexicanus OX=993612 PE=1 SV=1;50.000	80	5.27e-21;tr|A0A224X3W5|A0A224X3W5_9SCOR	83; Putative Non Disulfide Bridge Peptide OS=Megacormus gertschi OX=1843536 PE=3 SV=1;58.537	82	6.14e-27;Orbitrapmatches	Transcriptome;Insolution_Sp9Female	TRINITY_DN95_c0_g1_i3:True:117	100.000	76	1.0;Transcriptome_Sp9Female	TRINITY_DN95_c0_g1_i3:True:117	100.000	76	1.0;NA;NA;0;54;5773.14122;NA;NA
Uncharacterized Venom Compound Ei79;Enzyme;Female	Absence;Signal Peptide	CS pos: 22-23. Pr: 0.9318	0.9318;Stop codon present;2	Digestion Sp9;NA;NA;84	251.94;NA;;>TRINITY_DN5487_c0_g1_i3:True:93;GCAACATAAATTTCAACAGCTGTCTTGTAATTGACATTAAACTAATTTTAAATATTTCTAACCATATATATAACCACACTTCGCAAAGGCTAGTTTAGGATAAGAGAACAAGCCAAATTTTGTTCTTCCAAACCAACAGAAATGGGTTTAATTCTATACCTATTTCTTTCAACTTGGTTGTATGTTCTGAGCAGTGGCGTTTTTGGATCATGCCTAGTATCGCAAGATTCACCGGAATTTCAGTATATGATGAAGCAGAATCAGAAATTACATGATGCCTGTATGAACAAAAAACTTCCAAACTTTGATCCTATACCGATTGAAAACTGGGAAAGTTACAGTGAACCTACATATA…	36.264	546	0.7959183673469388;;723.192;92.312;NA;NA;NA;tr|A0A1W7R9Y0|A0A1W7R9Y0_9SCOR	600; Angiotensin-converting enzyme OS=Hadrurus spadix OX=141984 PE=3 SV=1;56.940	562	0.0;;Insolution_Sp2Male	TRINITY_DN66_c0_g1_i11:True:75	89.916	595	1.0;Transcriptome_Sp2Male	TRINITY_DN66_c0_g1_i11:True:75	89.916	595	1.0;NA;NA;13;573;67024.5156;NA;NA
Uncharacterized Venom Compound Ei80;Enzyme;Female	Expressionlevel;Signal Peptide	CS pos: 19-20. Pr: 0.9831	0.9831;Stop codon present;5_1	Digestion Sp9;NA;NA;74	242.86;1	24.82;>TRINITY_DN275_c0_g1_i2:False:1919;>TRINITY_DN2628_c1_g1_i13:True:1;CCTTGGTGAGGTGAGTACTGTTAATAAAAACAGCGCTATCAAATCGAAACTGTTACCCAACGGTGATATAAATTATCACGCGTGCGATAATACGTACAGAACGAGAGTGGTAAGGTTAGTAAGTAACACGGGGACCGTCGCTGGGGCCATGATCGTCTGGAACCGTTTTATTTTCGTGTGGCTTTTGATCTACGTAGTTAGTGGGTCGTATCATGAACCGAAGACTGTAAACGGCAGGAGCGTAATTGTGCACTTATTCGAATGGAAGTGGAAGGATATAGCTGACGAATGCGAGCAGTTCCTTGGTCCTTACGGTTTCGGTGGC…	100.000	575	1.0;175.294;1887.04;0.604689;sp|P85843|AMY_TITSE	39; Alpha-amylase (Fragment) OS=Tityus serrulatus OX=6887 PE=1 SV=1;76.316	38	7.63e-16;tr|A0A1W7RB82|A0A1W7RB82_9SCOR	536; Alpha-amylase OS=Hadrurus spadix OX=141984 PE=3 SV=1;84.250	527	0.0;Transcriptome;No hits in Other Sex;Transcriptome_Sp2Male	TRINITY_DN275_c0_g1_i2:False:1919	100.000	526	1.0;NA;NA;8;507;57801.116;NA;NA
Uncharacterized Venom Compound Ei81;Enzyme;Female	Absence;Signal Peptide	CS pos: 22-23. Pr: 0.9318	0.9318;Stop codon present;8	Digestion Sp9;NA;NA;81	237.26;NA;;>TRINITY_DN5487_c0_g1_i4:True:93;GCAACATAAATTTCAACAGCTGTCTTGTAATTGACATTAAACTAATTTTAAATATTTCTAACCATATATATAACCACACTTCGCAAAGGCTAGTTTAGGATAAGAGAACAAGCCAAATTTTGTTCTTCCAAACCAACAGAAATGGGTTTAATTCTATACCTATTTCTTTCAACTTGGTTGTATGTTCTGAGCAGTGGCGTTTTTGGATCATGCCTAGTATCGCAAGATTCACCGGAATTTCAGTATATGATGAAGCAGAATCAGAAATTACATGATGCCTGTATGAACAAAAAACTTCCAAACTTTGATCCTATACCGATTGAAAACTGGGAAAGTTACAGTGAACCTACATATA…	35.714	546	0.7959183673469388;;21.1065;92.312;NA;NA;NA;tr|A0A1W7R9Y0|A0A1W7R9Y0_9SCOR	600; Angiotensin-converting enzyme OS=Hadrurus spadix OX=141984 PE=3 SV=1;56.406	562	0.0;;Insolution_Sp2Male	TRINITY_DN66_c0_g1_i6:True:75	89.916	595	1.0;Transcriptome_Sp2Male	TRINITY_DN66_c0_g1_i6:True:75	89.916	595	1.0;NA;NA;13;573;67082.49594;NA;NA
Uncharacterized Venom Compound Ei82;Enzyme;Female	Absence;Signal Peptide	CS pos: 24-25. Pr: 0.9786	0.9786;Stop codon present;25	Digestion Sp9;NA;NA;49	180.34;NA;;>TRINITY_DN207_c0_g1_i1:False:2033;CGAATTAATTAAAACAAAAATAAATACTACTGTGTATATAAATAAAATACAGATAAGTTTAAAAATCTCATAGCTAAAACTTTTAAAACGTTAGATTTGGAAGAGCAAGTATTTTTATTTTTTACAGGTCATCACTAATAACGTCAGTAAATTTACAAAAAAATTCATTCGAAAATCTACGGTTTGTAAAGCACACTTTCTTATAAGAAGTTTAAACTGTATAGCCAATTATGACACATGTTTGCTACAATCTCATTTATTTATTACCTAGAAACCACAAAGTACTAAAATAATGTTATATATAATTAAACGAAAATTGAATAAACAGCCATCACAAAACGATTATGATTTTG…	97.253	546	0.975;;22.3152;6.44099;sp|W4VSJ0|ACES_TRILK	560; Acetylcholinesterase-1 OS=Trittame loki OX=1295018 PE=1 SV=1;37.079	534	1.66e-105;tr|A0A4Y2EC56|A0A4Y2EC56_ARAVE	544; Carboxylic ester hydrolase OS=Araneus ventricosus OX=182803 GN=ACES_47 PE=3 SV=1;40.653	551	1.96e-134;;Insolution_Sp2Male	TRINITY_DN2400_c0_g1_i2:False:1822	94.505	546	0.9981718464351006;Transcriptome_Sp2Male	TRINITY_DN2400_c0_g1_i5:False:1822	96.886	546	0.9981718464351006;NA;NA;7;523;58440.035;NA;NA
Uncharacterized Venom Compound Ei83;Enzyme;Female	Absence;Signal Peptide	CS pos: 25-26. Pr: 0.9808	0.9808;Stop codon present;26	Digestion Sp9;NA;NA;49	178.96;NA;;>TRINITY_DN207_c0_g1_i2:False:1838;TTTTTTTTTTTTCTTGCTCCAATCTCATTTATTCATTACCTAGAATCCCCAAAGTACCTAAAATAATGTTACATAGAATTAACGAAAATTGAATAAACAGTAATCACACAACAATTAGGATTTTGATAAGGGCGCGATCTTTCAGTAGTACTGCTTCCAAAACTTGCATTCCTCCTTATATGGATCTATGATCTTTGCGTTGTAAGGATTCAGATCGGCAGCTGCCGGTTTCTCTTCTGAATACATTGGCCATTCAGCTTCCAGCCCTTGAAACACTGGCTTCCCAGTCTTTGCAAATGAAATCCAGATATCCATTATCCTATTGCTAAATTCCAGATCTTCAGGGGTGTAGC…	96.237	558	0.9964285714285714;;45.1098;6.44099;sp|W4VSJ0|ACES_TRILK	560; Acetylcholinesterase-1 OS=Trittame loki OX=1295018 PE=1 SV=1;36.852	559	8.41e-106;tr|A0A4Y2EC56|A0A4Y2EC56_ARAVE	544; Carboxylic ester hydrolase OS=Araneus ventricosus OX=182803 GN=ACES_47 PE=3 SV=1;40.835	551	3.21e-136;;Insolution_Sp2Male	TRINITY_DN2400_c0_g1_i2:False:1822	95.985	548	1.0;Transcriptome_Sp2Male	TRINITY_DN2400_c0_g1_i5:False:1822	96.898	548	1.0;NA;NA;7;523;58447.1102;NA;NA
Uncharacterized Venom Compound Ei84;Other;Female	Absence;Signal Peptide	CS pos: 25-26. Pr: 0.9803	0.9803;Stop codon present;31	Digestion Sp9;NA;NA;71	167.11;19	128.49;;>TRINITY_DN15_c0_g1_i1:False:892;CACCAGTGCAGTAATGCTGTTGACATTTATTAATTAATTCTCCTATAAACCGTATCAAATTTCTATACAAACGAAATAAAAATAGTCTAAATCTGTATGCACATAAATCATTTATTTATCTCCATTTTTTACGAAATACATTTATCGCTTCCAGAAATCTGCACCCCGTCGAAGGCGACCATGGTGCTCTTCATCCAACTAATAACATTACCTCCCGAAAGGCAGCGTCCTTTCCTCACGTCACCCATTTCGTCAAAGCTCAGAACTTCGTCCCATAAGTGAATACCATGCATACTTCCGCCCCATGCGAGGTGGGTATGAAACTCATCGCGCGTCTTTTGCCTTTGTCCTATAACTA…	36.735	245	1.0;;1657.37;11.6328;tr|R7U8K0|R7U8K0_CAPTE	1967; Uncharacterized protein OS=Capitella teleta OX=283909 GN=CAPTEDRAFT_199677 PE=4 SV=1;26.111	180	3.82e-06;tr|A0A1W7RAR3|A0A1W7RAR3_9SCOR	241; Pentaxin OS=Hadrurus spadix OX=141984 PE=3 SV=1;36.820	239	1.20e-44;;Insolution_Sp2Male	TRINITY_DN257_c0_g1_i1:False:1897	67.078	243	1.0;Transcriptome_Sp2Male	TRINITY_DN257_c0_g1_i1:False:1897	67.078	243	1.0;NA;ProSiteProfiles	Pentraxin (PTX) domain profile.	27.534| PANTHER	PENTRAXIN	PTHR19277	1.8E-21| SMART	PTX_2	SM00159	5.6E-16| Pfam	Pentaxin family	PF00354	9.6E-20| Gene3D	-	G3DSA:2.60.120.200	2.3E-30| SUPERFAMILY	Concanavalin A-like lectins/glucanases	SSF49899	9.9E-23;7;218;24498.13027;NA;NA
Uncharacterized Venom Compound Ei85;Other;Female	Absence;Signal Peptide	CS pos: 20-21. Pr: 0.9830	0.9830;No Stop codon present;32	Digestion Sp9;NA;NA;43	162.82;NA;;>TRINITY_DN86_c0_g1_i4:True:36;GTCACTAAATCGATAGTTGGAGTTACAACTGCATGATTCAGATGTCACGAACATCTGCAAAAAATTCTCTATGCGTATTTCACACAGTTTAAATGCTACTCCATTGAATATACGATATCTACAAATAGCAGGTTAAGTATGAGACTTATGGTTATGCCCTCTTTCTACGGACTGCTTCTCTTAAGTTGTTTTTTTATTGAAAACGCCAAAGCTGGAGAAGATGTTTGCGGAACAAAAGTTAATGAGCATAGAGAAAATGGATATGTTGTTTGTGGAAAAGCCAATTCTGTGTGTCAAGAAATTCAAGACAATCAAGACTACACATGCATAGTATGCCAGGATCATGAAATCGCTTTG…	51.402	107	1.0;;36.1419;7.64434;NA;NA;NA;tr|A0A852C3V2|A0A852C3V2_9PICI	3054; FRAS1 protein (Fragment) OS=Ramphastos sulfuratus OX=322582 GN=Fras1_0 PE=4 SV=1;20.820	610	7.10e-20;;Insolution_Sp2Male	TRINITY_DN856_c1_g1_i2:False:489	100.000	124	0.19106317411402157;Transcriptome_Sp2Male	TRINITY_DN856_c1_g1_i7:False:2039	97.736	530	0.8166409861325116;NA;NA;74;629;70288.75239;NA;NA
Uncharacterized Venom Compound Ei86;Other;Female	Absence;Signal Peptide	CS pos: 25-26. Pr: 0.9803	0.9803;Stop codon present;35	Digestion Sp9;NA;NA;60	160.98;NA;;>TRINITY_DN15_c0_g1_i4:False:886;CACCAGTGCAGTAATGCTGTTGACATTTATTAATTAATTCTCCTATAAACCGTATCAAATTTCTATACAAACGAAATAAAAATAGTCTAAATCTGTATGCACATAAATCATTTATTTATCTCCATTTTTTACGAAATACATTTATCGCTTCCAGAAATCTGCACCCCGTCGAAGGCGACCATGGTGCTCTTCATCCAATTAATAACATTTCCTCCCGAACTGCAGCGTCCTTCCCTCACGTCACCCATTTCTTCAAAGCTCAGAACTTCGTCCCATAAGTGAATACCATGCATACTTCCGTCCCATGCCAGGTGGGTATGAAACTTATCGCGCGTCTTTTGCCTTTGTCCTATAA…	37.398	246	1.0040816326530613;;940.944;11.6328;tr|R7U8K0|R7U8K0_CAPTE	1967; Uncharacterized protein OS=Capitella teleta OX=283909 GN=CAPTEDRAFT_199677 PE=4 SV=1;25.269	186	6.30e-05;tr|A0A1W7RAR3|A0A1W7RAR3_9SCOR	241; Pentaxin OS=Hadrurus spadix OX=141984 PE=3 SV=1;39.167	240	4.00e-50;;Insolution_Sp2Male	TRINITY_DN257_c0_g1_i1:False:1897	66.803	244	1.0;Transcriptome_Sp2Male	TRINITY_DN257_c0_g1_i1:False:1897	66.803	244	1.0;NA;Pfam	Pentaxin family	5.5E-18| ProSiteProfiles	Pentraxin (PTX) domain profile.	PS51828	25.66| SUPERFAMILY	Concanavalin A-like lectins/glucanases	SSF49899	5.25E-23| Gene3D	-	G3DSA:2.60.120.200	7.7E-31| PANTHER	PENTRAXIN	PTHR19277	1.1E-21| SMART	PTX_2	SM00159	6.0E-13;7;219;24784.18022;NA;NA
Uncharacterized Venom Compound Ei87;Other;Unspecific;Signal Peptide	CS pos: 21-22. Pr: 0.9808	0.9808;Stop codon present;41	Digestion Sp9;NA;NA;31	157.87;3	56.03;>TRINITY_DN450_c0_g1_i1:True:45;>TRINITY_DN42489_c0_g1_i1:False:2627;TTTTTTTTTTATCTTTGTAAGATATTTATTTTTTTAATAAAACAAAAGTACTTTTACAGACTGTGTTTGCTTCATCTATTTGGATCCATTTCAAAAAGTAAATGCACTTATCTAATGCAATAGTTTCAGCCATTTCAAAGATGTATATCTGAATTATTCCCACGTAAAATTTACATTTCATATAATAGATACATTTCCAAACTTATTACAAATGATGCAATATTTTGCTTATGCTATGCTAATTCTGCATGGTTTCTGCCAGCAGACACCGGCTATACAATTTTGTAAACATGTATGAAGTAGTCAGAAAAATTATATGTAAAA…	100.000	771	1.0;184.03;286.072;73.9979;NA;NA;NA;tr|A0A1W7R9F7|A0A1W7R9F7_9SCOR	772; Transforming growth factor-beta-induced protein ig-h3 OS=Hadrurus spadix OX=141984 PE=4 SV=1;74.740	768	0.0;Transcriptome;No hits in Other Sex;Transcriptome_Sp2Male	TRINITY_DN450_c0_g1_i1:True:45	99.740	770	1.0;NA;Gene3D	FAS1 domain	1.3E-15| Gene3D	FAS1 domain	G3DSA:2.30.180.10	8.4E-15| Gene3D	FAS1 domain	G3DSA:2.30.180.10	1.0E-28| SUPERFAMILY	FAS1 domain	SSF82153	7.19E-35| SUPERFAMILY	FAS1 domain	SSF82153	1.96E-16| Coils	Coil	Coil	-| SMART	fasc_3	SM00554	5.3E-19| SMART	fasc_3	SM00554	4.9E-9| SMART	fasc_3	SM00554	2.5E-17| SMART	fasc_3	SM00554	1.9E-13| SUPERFAMILY	FAS1 domain	SSF82153	4.58E-33| ProSiteProfiles	FAS1/BIgH3 domain profile.	PS50213
Uncharacterized Venom Compound Ei88;Other;Female	Absence;Signal Peptide	CS pos: 20-21. Pr: 0.9830	0.9830;No Stop codon present;45	Digestion Sp9;NA;NA;41	149.28;NA;;>TRINITY_DN86_c0_g1_i6:True:36;GTCACTAAATCGATAGTTGGAGTTACAACTGCATGATTCAGATGTCACGAACATCTGCAAAAAATTCTCTATGCGTATTTCACACAGTTTAAATGCTACTCCATTGAATATACGATATCTACAAATAGCAGGTTAAGTATGAGACTTATGGTTATGCCCTCTTTCTACGGACTGCTTCTCTTAAGTTGTTTTTTTATTGAAAACGCCAAAGCTGGAGAAGATGTTTGCGGAACAAAAGTTAATGAGCATAGAGAAAATGGATATGTTGTTTGTGGAAAAGCCAATTCTGTGTGTCAAGAAATTCAAGACAATCAAGACTACACATGCATAGTATGCCAGGATCATGAAATCGCTTTG…	46.296	108	1.0093457943925233;;21.6092;7.64434;NA;NA;NA;tr|A0A7K4J888|A0A7K4J888_GEOCA	3309; FRAS1 protein (Fragment) OS=Geococcyx californianus OX=8947 GN=Fras1_1 PE=3 SV=1;22.136	515	2.74e-15;;Insolution_Sp2Male	TRINITY_DN856_c1_g1_i2:False:489	100.000	124	0.22586520947176686;Transcriptome_Sp2Male	TRINITY_DN856_c1_g1_i7:False:2039	96.047	430	0.7832422586520947;NA;NA;62;529;59165.83412;NA;NA
Uncharacterized Venom Compound Ei89;Enzyme;Female	Absence;Signal Peptide	CS pos: 22-23. Pr: 0.9765	0.9765;Stop codon present;47	Digestion Sp9;NA;NA;27	148.33;NA;;>TRINITY_DN1669_c0_g1_i1:False:1916;TTTTTTTTTTTAAGTTGTAATAAGATATTTATTCCATCATGTATTACAAATTTGAGGGGAACAATGATTTTTATATCAGGGGCAAACCATAGGGTCATTGCTGTTCCATCCTATAGTTTCACCTTCATTTTCTTCTCTCAGCCAATCGTACAGAGGTTGAAAATATTCCAAAAATGGTTTAGTGTCGATATTATTTGATTCACCATCGGTCATTAACGATATTTGTTCTTGCCACGGTTTCGACCATCCAAGAGATATTATTTCCCTGATTTTATTTCCAAATCTTTCTTCTCCATACAAATTGCATCGATGAAGAAAATCCGTACGTCCTGCCGCATTACAAGCGGCCTTG…	36.861	548	0.8430769230769231;;5.74276;20.7057;NA;NA;NA;tr|A0A1W7RA12|A0A1W7RA12_9SCOR	523; Angiotensin-converting enzyme OS=Hadrurus spadix OX=141984 PE=3 SV=1;45.229	524	7.68e-174;;Insolution_Sp2Male	TRINITY_DN45_c1_g1_i12:True:26	94.128	596	1.0;Transcriptome_Sp2Male	TRINITY_DN45_c1_g1_i12:True:26	94.128	596	1.0;NA;NA;10;574;68300.26887;NA;NA
Uncharacterized Venom Compound Ei90;Other;Unspecific;Signal Peptide	CS pos: 17-18. Pr: 0.9842	0.9842;Stop codon present;50	Digestion Sp9;NA;NA;69	146.45;NA;>TRINITY_DN213_c0_g1_i8:True:2;>TRINITY_DN36_c0_g1_i6:False:979;TTTTTTTTTACAATGCAATTTACTTTATTTCTTAATAATCATGTTTCCATTTCCCAAATCGAAAACGTTCTGATATAGGATACATTTTGAACTCGTTACTAAAATTACCAAATATTAATAAGACTTTAACTTCGCCTTTGTTATCTGTAGTCTTAGAATGACTCAATGCACAATGGTTCATCCATTATTATGCCTTTTATCCATTCTTCGTAATAACCAACCAGGGTAACCTGAGATAGACTGGACGGAAAGCGGCATTTTCCCTCTGATGATAAAGAAGCCACGGCAAGAAGTACGTATTCGCCATCAACATTTGCCATAAGCG…	99.273	275	0.9683098591549296;52.3147;220.444;61.0874;tr|A0A6P8J2Y6|A0A6P8J2Y6_ACTTE	345; chymotrypsinogen B-like OS=Actinia tenebrosa OX=6105 GN=LOC116308097 PE=4 SV=1;29.644	253	9.59e-24;tr|T1E7M6|T1E7M6_UROMN	251; S1P-Uro-1 OS=Urodacus manicatus OX=1330407 PE=2 SV=1;36.864	236	7.10e-43;Transcriptome;Insolution_Sp2Male	TRINITY_DN213_c0_g1_i3:True:0	79.537	259	0.9452554744525548;Transcriptome_Sp2Male	TRINITY_DN213_c0_g1_i8:True:2	99.267	273	0.9963503649635036;NA;NA;8;257;27918.90646;NA;NA
Uncharacterized Venom Compound Ei91;Other;Unspecific;Signal Peptide	CS pos: 21-22. Pr: 0.9842	0.9842;Stop codon present;60	Digestion Sp9;NA;NA;42	134.73;NA;>TRINITY_DN289_c0_g1_i1:False:2473;>TRINITY_DN208_c0_g2_i1:False:1132;ACCATGTGTTTAACTGGGCGAAACGTTTCTTTGTGAGAGAGATAATGAGTTTATGCATTGTGTATATGATATTCTATTAAACCGTGTATAAATTATTGCATAAATCAGTTCCAGTTCGAATCCTATCTGTTTTCTACAGTGCTCTGTTCTGAAAAGGTCCCCTCCCATCTTCACTGCATTAGCAGAGCTAAAATTTAAGCAATTATTTTATCATAAAAATTCAGTCTTTCAAAACACGATGATTAGAGCCGATGTAATTAACCAATTTCAAGTGAAATTGATTAGAACTGATGGAATTACCCAATTTCAAGTGAAATTG…	100.000	241	1.0;26.5885;171.157;40.1527;NA;NA;NA;tr|A0A4Y2CAN6|A0A4Y2CAN6_ARAVE	258; Uncharacterized protein OS=Araneus ventricosus OX=182803 GN=AVEN_179209_1 PE=4 SV=1;33.654	208	3.34e-27;Transcriptome;No hits in Other Sex;Transcriptome_Sp2Male	TRINITY_DN289_c0_g1_i1:False:2473	100.000	222	1.0;NA;NA;2;201;22690.98445;NA;NA
Uncharacterized Venom Compound Ei92;Other;Female	Absence;Signal Peptide	CS pos: 21-22. Pr: 0.9722	0.9722;Stop codon present;61	Digestion Sp9;NA;NA;35	133.95;17	205.76;;>TRINITY_DN122_c0_g1_i2:False:1347;AGCTGGAGAGAACTCTGTCTACTCTTCGAAAGGGCTACTTACTTTCTCTTCAGAAGGGTTACTTTCTTCCTAACTTATTGAAGAGGGGTACTTTCTTCCCAACTTATTGAAGAAGGGCTACTTTCTTCCCAACTTATTGAATTGAAGAAGGGCTACTTTCTTTCCAACTTATTGATGAAGGGCTACTTTCTTTCCAACTTATTGAAGAAGGACTACTTTCTTTCCAACTTATTGATTTCCAACTTATTGATGAAGGGCTACTTTCTTTCCAACTTATTGAAGAAGGACTACTTTCTTTCCAACTTATTGAAGAACCTGTAGTAGAAATAAAGGTTTCTCCCTCTTCCTCATAAGTG…	26.016	246	0.5503355704697986;;574.817;5.62244;sp|W4VS53|CRVP_TRILK	407; CRISP/Allergen/PR-1 OS=Trittame loki OX=1295018 PE=1 SV=1;29.555	247	1.31e-24;tr|A0A224XFB5|A0A224XFB5_9SCOR	256; Putative Venom allergen OS=Megacormus gertschi OX=1843536 PE=4 SV=1;74.016	254	3.40e-141;;Insolution_Sp2Male	TRINITY_DN37_c0_g2_i1:False:1522	97.248	327	0.872;Transcriptome_Sp2Male	TRINITY_DN37_c0_g2_i1:False:1522	97.248	327	0.872;NA;NA;12;354;40259.96816;NA;NA
Uncharacterized Venom Compound Ei92_variant;Other;Female	Absence;Signal Peptide	CS pos: 21-22. Pr: 0.9722	0.9722;Stop codon present;61_1	Digestion Sp9;NA;NA;34	133.95;16	205.76;;>TRINITY_DN122_c0_g1_i8:False:1362;AGCTGGAGAGAACTCTGTCTACTCTTCGAAAGGGCTACTTACTTTCTCTTCAGAAGGGTTACTTTCTTCCTAACTTATTGAAGAGGGGTACTTTCTTCCCAACTTATTGAAGAAGGGCTACTTTCTTCCCAACTTATTGAATTGAAGAAGGGCTACTTTCTTTCCAACTTATTGATGAAGGGCTACTTTCTTTCCAACTTATTGAAGAAGGACTACTTTCTTTCCAACTTATTGAAGAAGGGCTACTTTCTTTCCAACTTATTGATGAAGGGCTACTTTCTTTCCAACTTATTGAAGAAGGACTACTTTCTTTCCAACTTATTGAAGAACCTGTAGTAGAAATAAAGGTTTCTCCC…	26.016	246	0.5503355704697986;;141.41;5.62244;sp|W4VS53|CRVP_TRILK	407; CRISP/Allergen/PR-1 OS=Trittame loki OX=1295018 PE=1 SV=1;29.555	247	1.21e-24;tr|A0A224XFB5|A0A224XFB5_9SCOR	256; Putative Venom allergen OS=Megacormus gertschi OX=1843536 PE=4 SV=1;74.016	254	2.90e-141;;Insolution_Sp2Male	TRINITY_DN37_c0_g2_i1:False:1522	92.308	351	0.9236842105263158;Transcriptome_Sp2Male	TRINITY_DN37_c0_g2_i1:False:1522	92.308	351	0.9236842105263158;NA;NA;12;359;40747.1596;NA;NA
Uncharacterized Venom Compound Ei93;Enzyme;Unspecific;Signal Peptide	CS pos: 32-33. Pr: 0.3381	0.3381;Stop codon present;70	Digestion Sp9;NA;NA;50	124.68;NA;>TRINITY_DN6636_c0_g8_i1:True:360;>TRINITY_DN55465_c0_g1_i1:False:858;TTTGTTTTAAATATGTGGAATGTATAATAATAGTTTTATTGTTTAACAGGACTGTTTAAACAACAAAGGTTTATTGCTCAACCCGTTAACACACAAAGTTGGTGGCAAAAAAGGAAAAATATTATCACTTTCTTATCATTGTTCGTCATACACAAGCCTCTGGTTTCTTGCCCTCGTACAAATCGCATACAAGTCCCAGTAAATCTCTCATCGCCCTGTCCTGGTTGGCTTGTGAATATTGTCCGTTAACAACTATCCAAGGTACAAAGTACATTCGAGGCTTTAGATTTGTCGTCTTTTGTGCCATTTCGTGTTGCCA…	100.000	237	1.0;305.893;102.707;62.8807;NA;NA;NA;tr|A0A1W7RAG1|A0A1W7RAG1_9SCOR	229; Gamma-interferon-inducible lysosomal thiol reductase OS=Hadrurus spadix OX=141984 PE=3 SV=1;74.672	229	1.20e-127;Transcriptome;Insolution_Sp2Male	TRINITY_DN83_c0_g2_i1:True:373	56.459	209	0.9587155963302753;Transcriptome_Sp2Male	TRINITY_DN6636_c0_g8_i1:True:360	100.000	218	1.0;NA;NA;10;186;21197.3211;NA;NA
Uncharacterized Venom Compound Ei94;Enzyme;Female	Expressionlevel;Signal Peptide	CS pos: 16-17. Pr: 0.9831	0.9831;Stop codon present;80	Digestion Sp9;NA;NA;46	117.99;NA;>TRINITY_DN2102_c0_g1_i1:False:1184;>TRINITY_DN51827_c0_g1_i1:False:1252;AACAGCAACGTGTTTTTTATTTACGACAATATCTATATTCTTATAATTCTTAATTTATTCTCATTTACATTCAAATTTTCGAACAGCTCAAATTTATTATAATTACTAAAACAATTTCTGAATGAAATTTCGAGAACAACATAATTATATTACAATTACTGTACAAAATGCCATTTTGATAGGAATAAATGTTGACAAACGTCTTGCCACAACGTTCTTCATCTTGAAATACCGAAGTTCATTTTCACTATTCACTGATGGAAATATTTAGAACCTGTCACAATCCTGGATCCAATGTTTTGTAGGGGACGAAAAT…	100.000	324	1.0;22.6683;278.604;176.196;NA;NA;NA;tr|A0A087UAP3|A0A087UAP3_STEMI	319; Carbonic anhydrase (Fragment) OS=Stegodyphus mimosarum OX=407821 GN=X975_12748 PE=3 SV=1;45.525	257	1.76e-69;Transcriptome;No hits in Other Sex;Transcriptome_Sp2Male	TRINITY_DN2102_c0_g1_i1:False:1184	100.000	287	1.0;NA;NA;4;271;30715.46915;NA;NA
Uncharacterized Venom Compound Ei95;Enzyme;Female	Absence;Signal Peptide	CS pos: 18-19. Pr: 0.6225	0.6225;Stop codon present;81	Digestion Sp9;NA;NA;38	115.92;16	77.63;;>TRINITY_DN52307_c0_g1_i1:False:862;CTGGCATCGATATTTATTGATAATTGTTCCCTTTTTACATAAAGAGATAGAAAGAAGCTTTTTAACCATTGATCTTAAGTTTCGAAATTTCAGCTGATGAGGAAGAAAGGCGTGCCAAGTGTTTTTCTTAGCTACCATTCTTTGTAATTACTCATCCAAATACCACGTTTAACGGGGCAATCGTCGCTTCTGCCAGAACTTCCATAGGGACAATGCAACCGAAAACATTTGGGATTGTGTATTTCAAAGTAAAATCTCCTAATGATTAAAGCTGCTTGTCTATCCTCACCCTCTGTCTTACTGGCTATTTCCTGCAGACATTTGTCAAAAGCTTCTTCACAATCACAGTTCAACAG…	32.418	182	0.6127946127946128;;24.3604;136.746;sp|A0A1L4BJ46|HEMI1_HEMLE	233; Phospholipase A2 hemilipin OS=Hemiscorpius lepturus OX=520031 PE=1 SV=1;48.936	235	1.08e-75;tr|A0A224XBL2|A0A224XBL2_9SCOR	236; Phospholipase A(2) OS=Megacormus gertschi OX=1843536 PE=3 SV=1;70.042	237	9.68e-118;;Insolution_Sp2Male	TRINITY_DN2179_c0_g1_i1:False:1018	28.061	196	0.8305084745762712;Transcriptome_Sp2Male	TRINITY_DN9589_c0_g1_i1:True:0	32.584	178	0.7542372881355932;NA;NA;12;218;25241.07594;NA;NA
Uncharacterized Venom Compound Ei96;Other;Female	Absence;Signal Peptide	CS pos: 23-24. Pr: 0.9810	0.9810;Stop codon present;87	Digestion Sp9;NA;NA;41	110.87;46	117.18;;>TRINITY_DN2280_c0_g1_i1:False:293;TTTTTTTTTTTTTTGAAATCAAAACCAGATCTTTATTTTCGATAAAACAATTTTACATCAGTTCTTACCCAGCACGTCCCGACAATATTCCACACAATTATTGGGAATATATTCTTTATAGCACTTGTTTCTACAGAGATTGCGAGATCTAGCGAATTCTTCGTCGTTAAAATCGCCGCCATTTTCAATACCCCGAGTCTGATCTGGCAACACTGCGCACACTAACAGAAAAGCCAGGACTACCAGGTAACGCTTCATTTTCGCAAGAAGAATAGAGAAGTGATGTTTGTGTAACTATTATACTAA;MKRYLVVLAFLLVCAVLPDQTRGIENGGDFNDEEFARSRNLCRNKCYKE…	73; Potassium channel toxin kappa-KTx 5.1 OS=Heterometrus laoticus OX=217256 PE=1 SV=1;32.000	50	0.016;tr|A0A1B3IJ02|A0A1B3IJ02_9SCOR	79; Venom peptide HtC4Tx1 OS=Hadogenes troglodytes OX=1577150 PE=2 SV=1;56.098	41	8.94e-09;;Insolution_Sp2Male	TRINITY_DN131_c0_g2_i1:True:26	96.970	66	1.0;Transcriptome_Sp2Male	TRINITY_DN131_c0_g2_i1:True:26	96.970	66	1.0;NA;NA;4;43;5088.30651;NA;NA
Uncharacterized Venom Compound Ei97;Enzyme;Female	Absence;Signal Peptide	CS pos: 22-23. Pr: 0.9765	0.9765;Stop codon present;95	Digestion Sp9;NA;NA;14	103.94;NA;;>TRINITY_DN1669_c0_g1_i2:False:1916;TTTTTTTTTTTAAGTTGTAATAAGATATTTATTCCATCATGTATTACAAATTTGAGGGGAACAATGATTTTTATATCAGGGGCAAACCATAGGGTCATTGCTGTTCCATCCTATAGTTTCACATTCATTTTCATTTTTCAACCATTCGTACAGAGGCTGAAAATATTCGAAAAGTGGTTTAGCGTCCATATTATTCGATTCACCATCGGTCATTAACAATATTTGTTCTTGCCATGGTTTCGACCATCCAAGAGATATAAGTTCCCTCATTTTGTTTCCAAATGTTTCGTCTCCATACAAATTGCATCGATGAAGAAAATCCGTATGTCCCGTCGCATTACAAGCAGCCTTG…	36.738	558	0.8584615384615385;;3.08521;20.7057;tr|A0A293N3R4|A0A293N3R4_ORNER	1078; Uncharacterized protein (Fragment) OS=Ornithodoros erraticus OX=265619 PE=4 SV=1;40.000	45	0.075;tr|A0A1W7RA12|A0A1W7RA12_9SCOR	523; Angiotensin-converting enzyme OS=Hadrurus spadix OX=141984 PE=3 SV=1;46.374	524	2.76e-179;;Insolution_Sp2Male	TRINITY_DN45_c1_g1_i10:True:26	90.604	596	1.0;Transcriptome_Sp2Male	TRINITY_DN45_c1_g1_i10:True:26	90.604	596	1.0;NA;NA;12;574;68235.11902;NA;NA
Uncharacterized Venom Compound Ei98;Enzyme;Unspecific;Signal Peptide	CS pos: 21-22. Pr: 0.9798	0.9798;Stop codon present;104	Digestion Sp9;NA;NA;16	99.90;NA;>TRINITY_DN31418_c0_g1_i1:True:89;>TRINITY_DN42671_c0_g1_i1:False:1669;CTTAGTTTAAACTATCTTCTAGTAAACAATGAGAAAAGGAATGCGTTTAACTATTTATTAATCTTTTAACATCCATCGACACCTGAGGGGAAACCACAACTTCCCAATTCTTTACGGAACACGGTACCAGGAGCGCAATCTTGTACTAATGATTTTAACCTTCCTTCGCTTCCCTCGTAACAATTGACAAATTTCGTGCAGTCTCCAGGGTAAGGAAACAGTCCTGGCCCTTCGCAGGTGACTATGAAGCCCGTGTCGGTGGTTACAGTGATTGGTGGGGGTGGTTCAGTTGGTCTCGTTGGTATCACTGGACCTTTGG…	100.000	499	0.9784313725490196;4.15352;8.09272;4.5076;NA;NA;NA;tr|A0A4Y2HME5|A0A4Y2HME5_ARAVE	481; Chitotriosidase-1 OS=Araneus ventricosus OX=182803 GN=CHIT1_8 PE=3 SV=1;60.625	480	0.0;Transcriptome;Insolution_Sp2Male	TRINITY_DN36_c0_g1_i1:True:114	42.998	407	0.8172690763052208;Transcriptome_Sp2Male	TRINITY_DN31418_c0_g1_i1:True:89	100.000	498	1.0;GO:0008061: chitin binding (molecular_function)| GO:0004553: hydrolase activity	hydrolyzing O-glycosyl compounds (molecular_function)| GO:0005975: carbohydrate metabolic process (biological_process)| GO:0005576: extracellular region (cellular_component);SUPERFAMILY	Chitinase insertion domain	6.68E-21| SMART	2g34	SM00636	2.2E-154| SUPERFAMILY	Invertebrate chitin-binding proteins	SSF57625	1.07E-10| Gene3D	Antimicrobial Protein	G3DSA:2.170.140.10	1.6E-6| PANTHER	CHITINASE	PTHR11177	4.8E-130| ProSitePatterns	Chitinases family 18 active site.	PS01095	-| ProSiteProfiles	Chitin-binding type-2 domain profile.	PS50940	11.021| Pfam	Chitin binding Peritrophin-A domain	PF01607	7.7E-9| CDD	GH18_chitolectin_chitotriosidase	cd02872	0.0| PANTHER	OVIDUCT-SPECIFIC GLYCOPROTEIN	PTHR11177:SF217	4.8E-130| Pfam	Glycosyl hydrolases family 18
Uncharacterized Venom Compound Ei99;Other;Female	Absence;Signal Peptide	CS pos: 22-23. Pr: 0.9820	0.9820;Stop codon present;119	Digestion Sp9;NA;NA;33	94.74;64	249.00;;>TRINITY_DN1105_c0_g2_i1:False:759;TTTTTTTTTGGCGTCCACCACTTTTTTATTCGTTTATTTACAACAAACGCATGCAGAGCACAAAATAATCAATAATATATTTTTTTTTCCTTAAGTTTGGTCAAATTACATATATTTGAAACCCTGTAGTGTTTTTGGTAATTAGAACAAACAAACGAAAAATTACCCTGGACGAGCGCTTCATATTTTTTTAAATTTTCGCTATGTTTTCAAAACTGTCCACCAGAGGCGCTCTCCGCATTCCGTAGAAACGTCGACAACTCAAAGACGGGCTCTGACGATTTTATTTTCCGTACCTCATATGACCGTAATCGTCGTATTTTTTAACGGCTGCTTCATCTTTGCTTCTTCCAAAC…	100.000	146	1.0;;1419.03;35.6053;NA;NA;NA;tr|A0A1W7RAM0|A0A1W7RAM0_9SCOR	127; Drosulfakinins OS=Hadrurus spadix OX=141984 PE=4 SV=1;80.315	127	7.49e-73;;No hits in Other Sex;;NA;NA;0;105;12317.07277;NA;NA
Uncharacterized Venom Compound Ei100;Other;Female	MALDI;Signal Peptide	CS pos: 20-21. Pr: 0.7903	0.7903;Stop codon present;156	Digestion Sp9;NA;NA;25	78.04;9	66.37;>TRINITY_DN24064_c0_g1_i1:True:1;>TRINITY_DN40155_c0_g1_i1:True:141;TTTATTTCCTGTAAGACCGGATGTCAATTTGATCCATCGATTTTAAATACCTTCCCTATCCGATGTTAACAACTTATTTCGTATTGGACGGAACGGAAGGCGTGGTTTACTGGCAGTCACGTGATCGCTAGGGCATGTTAAAAGCTATATAGTCAGGGAGAGACCGTATTTACGTTCATATTACACCACCCCGCCGCAGATAAGCTTACAGCCGAAATGGATAGCAAGTTTGTAATATATTTGAGCACTTTAAACTTATTGGTGTGCGTTTGTTGTTTTGAAGACAGTTCTCTACGGAGTATGATCCATCAGTGGAGACAGCGCA…	100.000	181	1.0;11.6725;39.3555;49.3867;NA;NA;NA;tr|A0A1W7R946|A0A1W7R946_9SCOR	149; Venom protein OS=Hadrurus spadix OX=141984 PE=4 SV=1;65.031	163	3.27e-75;Transcriptome;No hits in Other Sex;Transcriptome_Sp2Male	TRINITY_DN24064_c0_g1_i1:True:1	100.000	163	1.0;NA;NA;4;143;16491.20712;NA;Mass: 1665.8236999999997 (SDQEVRRNVQNHAL)	PTMs:
Uncharacterized Venom Compound Ei101;Other;Unspecific;Signal Peptide	CS pos: 22-23. Pr: 0.9800	0.9800;Stop codon present;169_1	Digestion Sp9;NA;NA;28	71.78;41	274.70;>TRINITY_DN298_c0_g1_i1:False:446;>TRINITY_DN262_c0_g1_i4:True:149;GAGAAACTTAATAAAGTGGCCATATTTAATCCAGCCGTTTCGTTGAATCATTACACGTCATCGAAAGACACTTCGAACGATTTGATATTAAATATTTGTAGCGACGAACAGTTGTTAGAATGGTATAAAAACAAATAGCAAAGCTGTGAAACTCTATCGTTTTTTCTACCCAAACGCTGCGCAGATTTACCCTCCATAACGAATATCGATCATACAAAAAACTCGAAAACAAACCTCAAGTGCAAGGAAAAATGAACGCAAAAGCTCTTCTTGTGATTTTTATCGTTGCATTGCTCGTGACGGAACAAGCCGAAGCGGGTTGGTT…	81; Venom protein HGE029 OS=Hoffmannihadrurus gertschi OX=380989 PE=3 SV=1;52.500	80	5.07e-20;tr|A0A224X3Y3|A0A224X3Y3_9SCOR	81; Putative Non Disulfide Bridge Peptide OS=Megacormus gertschi OX=1843536 PE=4 SV=1;76.923	78	1.54e-34;Transcriptome;Insolution_Sp2Male	TRINITY_DN379_c0_g1_i1:False:340	33.333	78	0.9629629629629629;Transcriptome_Sp2Male	TRINITY_DN298_c0_g1_i1:False:446	100.000	81	1.0;NA;NA;0;59;6616.36954;NA;NA
Uncharacterized Venom Compound Ei102;Other;Unspecific;Signal Peptide	CS pos: 16-17. Pr: 0.9826	0.9826;Stop codon present;172	Digestion Sp9;NA;NA;17	70.42;NA;>TRINITY_DN2549_c0_g1_i1:True:1;>TRINITY_DN1435_c0_g1_i1:False:1474;TTAACAGCAATTTCAAATACTTTTATTATTCACAAATATAGATTATATGGCAGTGATTAAAATGGCAAAAACTATATTAAAATTGTATTCGCGTTTTTTATTTGTTTGGCACAAACATTATACAGACATACAAACACACACAAAAATAAAACGGTAAATTTTTGTTATAAACAAATATGCAAACGATGGCAGAGAGAAATCAGAAATGAAGTCACACCGAGTGAGTGAATGAGTATACATTGTGTTAAAACGAAAAAGGTAAATAATGACGCAATAAGAAAGTCATCTTACGTAATGGAATAAGAAAATGGGGCTTTCTTTT…	100.000	261	0.9961832061068703;141.205;342.992;411.546;sp|G4V4G1|IGFBP_CUPSA	262; Insulin-like growth factor-binding protein-related protein 1 OS=Cupiennius salei OX=6928 PE=2 SV=1;62.651	249	4.52e-107;tr|A0A1V1WBF8|A0A1V1WBF8_9SCOR	257; Putative venom protein (Fragment) OS=Superstitionia donensis OX=311983 PE=4 SV=1;90.625	256	1.96e-175;Transcriptome;Insolution_Sp2Male	TRINITY_DN596_c0_g1_i8:True:268	36.000	100	0.3952569169960474;Transcriptome_Sp2Male	TRINITY_DN2549_c0_g1_i1:True:1	100.000	253	1.0;GO:0005520: insulin-like growth factor binding (molecular_function)| GO:0005576: extracellular region (cellular_component)| GO:0001558: regulation of cell growth (biological_process)| GO:0005515: protein binding (molecular_function);ProSiteProfiles	Insulin-like growth factor-binding protein (IGFBP) N-terminal domain profile.	16.776| PANTHER	INSULIN-LIKE GROWTH FACTOR BINDING PROTEIN-RELATED	PTHR14186	4.9E-65| Gene3D	-	G3DSA:3.30.60.30	1.3E-22| ProSiteProfiles	Ig-like domain profile.	PS50835	12.876| CDD	Ig	cd00096	7.91521E-11| Pfam	Immunoglobulin I-set domain	PF07679	3.1E-12| SUPERFAMILY	Immunoglobulin	SSF48726	6.29E-18| CDD	KAZAL_FS	cd00104	0.00170902| PANTHER	KAZAL-TYPE SERINE PROTEASE INHIBITOR DOMAIN CONTAINING PROTEIN	PTHR14186:SF19	4.9E-65| SMART	kazal_3	SM00280
Uncharacterized Venom Compound Ei103;Other;Female	MALDI+Absence;Signal Peptide	CS pos: 18-19. Pr: 0.9828	0.9828;Stop codon present;175	Digestion Sp9;NA;NA;39	69.42;NA;;>TRINITY_DN194_c0_g1_i1:True:352;AGCATTTCAATGATGTACACTCTGAAATTGATTGTAATCTGAGCGTTGGCGTGCTGCGTTCTTTCTGAAACATATATGAAGGAAATAGGTCATAGACTTTGTGCAGACACATGCAACAGTGGAGGACTTGCACTTTGCGGAAATAGACTCTATCCCAAGTGGATTTACACTGCCGATAAATGCTTTTCTGCCGATGCAAAAGGCTTTAATAGTCTAGAAGATTACCTCAAATGTTTTTGTAAGGAGGCTAGTAAAGAGCAACACCTCGAAACATTTGAACTGCACCAGATTTGATGCAATAAATTGAAGTACAAGCGAGCCGAATCGTTAATGTTTGGAGAACAGCATTTGAATGA…	100.000	118	1.0;;46.3315;7.79975;NA;NA;NA;tr|A0A1W7R996|A0A1W7R996_9SCOR	118; Venom protein OS=Hadrurus spadix OX=141984 PE=4 SV=1;31.092	119	2.22e-14;;Insolution_Sp2Male	TRINITY_DN15064_c0_g1_i1:True:39	97.436	117	1.0;Transcriptome_Sp2Male	TRINITY_DN15064_c0_g1_i1:True:39	97.436	117	1.0;NA;NA;8;99;11399.49302;NA;Mass: 839.4483 (ETHIVEI)	PTMs: A	Mass: 839.4483 (ETHIVEI)	PTMs: A	Mass: 1319.56088 (NGVEECLRKNGC)	PTMs: C-C
Uncharacterized Venom Compound Ei104;Other;Unspecific;Signal Peptide	CS pos: 31-32. Pr: 0.9808	0.9808;Stop codon present;190	Digestion Sp9;NA;NA;11	63.35;9	31.48;>TRINITY_DN35509_c0_g1_i1:False:1123;>TRINITY_DN42801_c0_g1_i1:False:1184;CGTCAGTTTTATAATTCTCACGATACACAAGATGAAAGAATTAGATACAAAGATTTTGTTTGCTTCAGAGACAGTTTCATGCAGATAATGAATTTTCTGAAAAGAATTTGCTTATAAACGATTATATATGTTCACCTTAATTATAATGTGTTAATAGAATAGCTAAAGAAACGATAATTCTCTCAAGTTTATGTTTTATTACCAACCATCCATAAAGAAAAATCATTATTTATAAATAAATATTTACCGCCATCGCGATTTATATTCATATTTACTGAAATGATACTGTGTACAAGATACAACTCACTGGATTTCCCCG…	100.000	243	1.0;13.433;47.1381;5.39589;NA;NA;NA;tr|A0A1W7R982|A0A1W7R982_9SCOR	243; Venom protein OS=Hadrurus spadix OX=141984 PE=4 SV=1;85.597	243	2.40e-143;Transcriptome;No hits in Other Sex;Transcriptome_Sp2Male	TRINITY_DN35509_c0_g1_i1:False:1123	100.000	242	1.0;GO:0005184: neuropeptide hormone activity (molecular_function);MobiDBLite	consensus disorder prediction	-| Pfam	Allatostatin	PF05953	20.0| Pfam	Allatostatin	PF05953	0.89| Pfam	Allatostatin	PF05953	25.0| Pfam	Allatostatin	PF05953	0.39| Pfam	Allatostatin	PF05953	7.5| Pfam	Allatostatin	PF05953	11.0| Pfam	Allatostatin	PF05953	0.89| Pfam	Allatostatin	PF05953	6.3| Pfam	Allatostatin	PF05953	9.9| Pfam	Allatostatin	PF05953	0.31| Pfam	Allatostatin	PF05953
Uncharacterized Venom Compound Ei105;Other;Unspecific;Signal Peptide	CS pos: 18-19. Pr: 0.9839	0.9839;Stop codon present;211	Digestion Sp9;NA;NA;19	55.58;NA;>TRINITY_DN42291_c0_g1_i1:False:523;>TRINITY_DN1589_c0_g1_i1:True:1;AGAACAACGTGCAACTATGTTCGCTCTGAAACTGATAATAACCTGTGCAGTAGTATGCAACGTTCTCTCTGAACCAGAATTAGAGAAACTCGCTTATCAACTTTGTGCAGTTGAATGCAACCAAGAGGGATATGTACATTGCAGAAACAGACATTTTCCCGAGTGGATTCACACTGCTGATAAATGTCTTTCTGCCGAAGAAAAAGGCTTTGCTAGTATAAAAGAATTCTTCAAATTTTTTTGCGAGGACGCTAGTCATGAAGAATTTCTGCGTATTCTCAATTGTTACTTCGAGGAAATGTTGAAATTGTATAAGAAAGAT…	99.219	128	0.8951048951048951;15.5129;29.0874;104.338;NA;NA;NA;tr|A0A1W7R972|A0A1W7R972_9SCOR	116; Venom protein OS=Hadrurus spadix OX=141984 PE=4 SV=1;34.746	118	5.07e-16;Transcriptome;Insolution_Sp2Male	TRINITY_DN15064_c0_g1_i1:True:39	50.427	117	0.9512195121951219;Transcriptome_Sp2Male	TRINITY_DN42291_c0_g1_i1:False:523	99.187	123	1.0;NA;NA;8;105;12466.9862;NA;NA
Uncharacterized Venom Compound Ei106;Other;Unspecific;Signal Peptide	CS pos: 20-21. Pr: 0.9832	0.9832;Stop codon present;218	Digestion Sp9;NA;NA;15	53.98;NA;>TRINITY_DN35288_c0_g1_i1:True:5;>TRINITY_DN60697_c0_g1_i1:False:492;CCGGGGTTGTGAGTTCGAGCCTCACTTTCTCAATACCAAACTTCTTACGCAATAAGTTTTTCTGGGAGATATTTATATCTGAATTTCGAAGTTTTTATTTGTCGTTAACGAACAGAGTGAACATTTAACTTATTTAATTTTACAATATTTTTAATGTTTGATTTATTACGTAATTCCATTGATATTTATTTTCCCATTCGGTTGTTTTCGGTTCCGTCTCTTCTTCATTCGTCGTAAATCAAGGAGTTGTTGAGGATAAGCCCTTTTTCATACATCCGCACAGTTCTTCCTGAGCTGCCATTTTCAAGGTAACGTTTGAGG…	79; Venom protein OS=Hadrurus spadix OX=141984 PE=4 SV=1;54.430	79	1.73e-23;Transcriptome;No hits in Other Sex;Transcriptome_Sp2Male	TRINITY_DN35288_c0_g1_i1:True:5	100.000	80	1.0;NA;NA;3;60;6692.17692;NA;NA
Uncharacterized Venom Compound Ei107;Other;Female	Absence;Signal Peptide	CS pos: 20-21. Pr: 0.9807	0.9807;Stop codon present;226	Digestion Sp9;NA;NA;23	52.33;40	123.45;;>TRINITY_DN282_c0_g1_i1:False:793;TTTTTTTTTTTTTTTCACATAAAATAGTTTTCACTTTATTTTCTGGATAACTGATACATTGGACAAGGTAAAATCATTTGCAGCAAAATTCCTTTAATACTTCCCCAATTCAACTCAAAATAGTACATTCTGTAACAAACCAGGGCATTTTTCTAATAAATATTGATGATTTTTTACGTATCAGTGACCTCGTTTTATGATTCTTGCTTTGTAGGAATGAGAATTTCGATGCTGTATATTATTTTAATATATCCAGGTCACACGCTGCTGATATTTTTAACTATTTTCATCGAAACTATACGGTTTATTTCTTTAAATAATTGTTTATAACATTTACTCGTATACATTGTTGCTGGT…	100.000	106	1.0;;305.128;25.8304;NA;NA;NA;tr|A0A1W7R988|A0A1W7R988_9SCOR	95; Venom protein OS=Hadrurus spadix OX=141984 PE=4 SV=1;52.083	96	2.12e-30;;No hits in Other Sex;Transcriptome_Sp2Male	TRINITY_DN38874_c0_g1_i1:False:834	96.875	96	1.0;NA;NA;4;76;9027.49318;NA;NA
Uncharacterized Venom Compound Ei108;Other;Unspecific;Signal Peptide	CS pos: 18-19. Pr: 0.9838	0.9838;Stop codon present;243	Digestion Sp9;NA;NA;14	44.53;NA;>TRINITY_DN782_c0_g1_i3:False:794;>TRINITY_DN57_c0_g1_i3:False:735;TTTTTTCTAGAATATGCTCAATTTTATTACTCCAATTAGAAGTTATACAGATTGGTTTGGGTTAAGCTATAATTCCATAGGATACAGCAAATGAAAGTTCCCCTAAAAATAAACCAAAACCCGATTATTTTACTATATTCTACATTAATACACACAATTTCAGTTTAACATTCAGAAAGCAATAACTAATCAATATGACAATGAAAAATGGCTAATTATGGTTACAATTTGATTCTTCAAAAAACTGTTTTCCTTTTTTAAATCTTATAGAATAAAGGTTATCTCTTTAAGCATATCTTCTAAAGTAACTGCAAACAGAAAGT…	99.180	122	1.0;5.13637;65.8518;33.4303;NA;NA;NA;tr|A0A1W7R973|A0A1W7R973_9SCOR	117; Venom protein OS=Hadrurus spadix OX=141984 PE=4 SV=1;33.898	118	6.46e-14;Transcriptome;Insolution_Sp2Male	TRINITY_DN15064_c0_g1_i1:True:39	40.171	117	1.0;Transcriptome_Sp2Male	TRINITY_DN782_c0_g1_i3:False:794	100.000	117	1.0;NA;NA;8;99;11286.53469;NA;NA
Uncharacterized Venom Compound Ei109;Other;Female	Absence;Signal Peptide	CS pos: 19-20. Pr: 0.9834	0.9834;Stop codon present;249	Digestion Sp9;NA;NA;11	42.31;NA;;>TRINITY_DN350_c0_g1_i1:True:30;CTGGAGCCAAATCGTTAATTTTTGCAATAATTGGAGAACACCATTTCAATGATGTACACTCTGAAACTGACTGTAATCTCCGCACTGGTATGCTGCGTGCTTTCTGAAACATATACGGAGAAAGTAGTTCGTAGATTTTGTGCTGACACATGCAACAATGTAGGAAGTGTACATTGTGGAAACAGACTCTATCCCAAGTGGATACACACTGTCCAAAAATGCTTTCCTGCTGATGGAAAGGGCTTTAATAGTATAGAGGAGTTCATCCAAGTTTACTGCAAGGAGGCTAGTAAAGAGGAACAAATGCGTATTGCTAATTGTCTCTATGGTGATATGAAGTCAATGTTCCCGAAAGAC…	98.387	124	1.0;;224.839;272.9;NA;NA;NA;tr|A0A1W7R972|A0A1W7R972_9SCOR	116; Venom protein OS=Hadrurus spadix OX=141984 PE=4 SV=1;32.479	117	6.63e-16;;Insolution_Sp2Male	TRINITY_DN15064_c0_g1_i1:True:39	72.650	117	0.9915254237288136;Transcriptome_Sp2Male	TRINITY_DN1146_c0_g1_i2:True:5	96.610	118	1.0;NA;NA;8;99;11391.28444;NA;NA
Uncharacterized Venom Compound Ei110;Enzyme;Female	Absence;Signal Peptide	CS pos: 19-20. Pr: 0.6285	0.6285;Stop codon present;60	Reduced Sp9;NA;NA;NA;13	85.28;;>TRINITY_DN4_c0_g1_i2:False:1377;CATATATACATACACGCTGAAGACATATATATATATATATATATATATACAACTACAAGCAAGTACTTTGAAACCAAGCAACTCTTGGTTTCAAAACCACTGTGGAAGCTGCAATACTGGAAGTTCAGTTCAGTAATTGGAACCACTGTTGAAGCTGCAATATTGGAACAGGTTCCCAAAGTGTGGGTCGCGTTAAATATTAAAATATGATAGCCACTAGGCGCAAGAGAAATTTTTTATGAAAATTGATGACGTCACAAGCTCGTTACAACGTTAATCTTGTATGATTCAAAAGCTCGTGACAACATTTTAAAAGGAGGGGTGGGGTTGAATAAAATATTTTTTATTCACCCCCCTTC…	100.000	224	0.7832167832167832;;14.6647;11.0768;tr|A0A6G5ZVU8|A0A6G5ZVU8_VIPAN	403; Snake venom serine protease (Fragment) OS=Vipera anatolica senliki OX=2604287 PE=2 SV=1;33.889	180	3.51e-17;tr|A0A1W7R9I5|A0A1W7R9I5_9SCOR	283; Serine proteinase OS=Hadrurus spadix OX=141984 PE=4 SV=1;64.253	221	9.23e-100;;Insolution_Sp2Male	TRINITY_DN8382_c0_g1_i2:False:1093	100.000	220	0.9777777777777777;Transcriptome_Sp2Male	TRINITY_DN8382_c0_g1_i2:False:1093	100.000	220	0.9777777777777777;NA;NA;7;206;22558.15562;NA;NA
Uncharacterized Venom Compound Ei111;Other;Female	MALDI+Expressionlevel;Signal Peptide	CS pos: 21-22. Pr: 0.9834	0.9834;Stop codon present;83	Reduced Sp9;NA;NA;NA;17	57.52;>TRINITY_DN73_c0_g1_i9:False:256;>TRINITY_DN58415_c0_g1_i1:True:88;CCTATAAATTCCCCGCCATATATTTCGTCTACGCACTGAAGAACGGAACAATATTGGAGCGTAAATACCATAATTTACGAAATTATAAACTATGCACCGATACACGTTGGTAGTATTAATGCTGGCAGCAGTATTTGTTGATTTCTACCATGCAGAGTTCATCGAAGAACAAGCAAAGGATGAAGAGTTATACAGAATGTCTGAAGATTCCGAATCTGAAGAATCTGTGCGCAAGAATGATGAATTACGCTGTACGATTGGTAAATGTCCCAAATGGTCACTGGGTTGAAAATGACGGAATAGAGAACTACTGATTGAAATATAAT…	68; Venom peptide HtC2Tx2 OS=Hadogenes troglodytes OX=1577150 PE=2 SV=1;40.000	65	7.39e-07;Transcriptome;No hits in Other Sex;Transcriptome_Sp2Male	TRINITY_DN73_c0_g1_i9:False:256	100.000	65	1.0;NA;NA;2;44;5193.39065;NA;Mass: 1090.55352 (KNDELRCTI)	PTMs: A	Mass: 1090.55352 (KNDELRCTI)	PTMs: A	Mass: 1859.90729 (NDELRCTIGKCPKWSL)	PTMs: A	C-C
Uncharacterized Venom Compound Ei112;Other;Unspecific;Signal Peptide	CS pos: 22-23. Pr: 0.9815	0.9815;Stop codon present;95	Reduced Sp9;NA;NA;NA;17	47.42;>TRINITY_DN295_c0_g1_i2:True:1;>TRINITY_DN4860_c0_g1_i1:False:495;TTTTTTTTTTTTTAGCATTGGGTAGACTTTAATGATTGAAAGTTTTTACAAGCAATAATTTATCTTGACAATTGTTAAAGGTTCCATTTAATAGAAAGGAAATTTAAACGAATCTCTTGACGATAAGTTTGATGTTAAACCGATCCTGGGTTCTGAATACTCAACCTCGTCTGACGTAAATGCATTTTCTTATCTTTCTTCTCAGTCGCTTCATTCTCTTTACATTTCTCACTCTTTTTATGACTTTCACGATTCTCTGGACCCTGGGAATTACTCTCGTCATTGTTCTAATTACACTTGTTCTTCTTATGTTACCTCTTCTGGGGT…	77; Venom protein OS=Hadrurus spadix OX=141984 PE=4 SV=1;47.826	69	1.84e-11;Transcriptome;Insolution_Sp2Male	TRINITY_DN2022_c3_g1_i1:True:63	56.757	74	0.9367088607594937;Transcriptome_Sp2Male	TRINITY_DN295_c0_g1_i2:True:1	100.000	79	1.0;NA;NA;2;57;7143.30347;NA;NA
Uncharacterized Venom Compound Ei112_variant;Other;Female	MALDI;Signal Peptide	CS pos: 22-23. Pr: 0.9815	0.9815;Stop codon present;95_1	Reduced Sp9;NA;NA;NA;14	47.42;>TRINITY_DN295_c0_g1_i1:True:1;>TRINITY_DN4860_c0_g1_i2:False:1260;CCGATCTCTTTGGTAAATCTTGTTAAGCAACCGATATGTTGGTGGAAAACAAATTTAAACCCCGGCAGACTTTTCATTTGAGCCGTTGTTTTAGAGAAATCGTCATTAAAGGTTTGTGACGTCAGGTCTTCAAATAAACTCGAACCCAAAATGAAGATTTCGCAATTACTGCTACGCATGTACAACAATTAACATTGATAGAGAATATGCTCCAAATGGACATTGGCAGAAATTATTTTCCTTGGTTCCTTTTACAGTTTGACTAAAAGTATCTACGAATCGAATGCCCGAATACTTTAGACAAAGAATTAATACGAGACACGTGA…	77; Venom protein OS=Hadrurus spadix OX=141984 PE=4 SV=1;47.826	69	2.87e-11;Transcriptome;Insolution_Sp2Male	TRINITY_DN2022_c3_g1_i1:True:63	54.430	79	0.79;Transcriptome_Sp2Male	TRINITY_DN295_c0_g1_i1:True:1	100.000	100	1.0;NA;NA;4;78;9841.84834;NA;Mass: 3369.07203 (MKRLRRKIRKCIYVRRVSRVLKARRQ)	PTMs:
[truncated: 126 more columns]
